# Supplementary material for: A Systematic Review of Melatonin in Plants: An Example of Evolution of Literature
Source: Front Plant Sci. 2021 Jun 18;12:683047. doi: 10.3389/fpls.2021.683047 (PMC8270005; doi:10.3389/fpls.2021.683047)
Supplement: Supplementary Data 1 — Complete bibliography with original research articles included in this study and query terms. [file Table_1.XLSX]

## Sheet: Articles-Jan8-withRef
SUM									52	258	231	188	74	49	14	4	12	1	1	4	0	0	1	6	0	0	0	4	0	4	104	147	107	118	85	98	13	11	27	67	25	120	15	1	23	41	36	9	21
						Authorship			Melatonin Discovery			Treatment types			Metabolism																	Antioxidant					Light										PGRs
Title	Authors	Abstract	Journal	Year	DOI	First Author	Last Author	Total Number Authors	1997 Murch	Dubbels 1995	Hattori 1995	exogenous	endogenous	transgenic OR knockout	hydroxymelatonin	3-hydroxymelatonin OR 3-OHM	2-hydroxymelatonin OR 2-OHM	6-hydroxymelatonin OR 6-OHM	4-hydroxymelatonin OR 4-OHM	cyclic hydroxymelatonin OR cyclic 3-hydroxymelatonin	melatonin glucoronide	AMIO OR 2-acetamidoethyl-5methoxyindolin-2-one	AMK OR N-acetyl-5methoxykynuramine	AFMK OR N1-acetyl-N2-formyl-5-methoxykynuramine	2,3-dihydroxymelatonin	5-MIAA OR 5-methoxyindole-3-acetic acid	5-ML OR 5-methoxytryptophol	5-MT OR 5-methoxytryptamine	5-methoxy-1H-indole-3-carbaldehyde	conjugate	metabolism	antioxidant	ROS or reactive oxygen species	H2O2 OR hydrogen peroxide	malondialdehyd	superoxide	rhythm	diurnal	photosynthesis	light	UV	chlorophyll	carotenoid	betanin	anthocyanin	senescence	abscisic acid	Gibberellin OR gibberellic acid	salicylic acid
MELATONIN IN EDIBLE PLANTS IDENTIFIED BY RADIOIMMUNOASSAY AND BY HIGH-PERFORMANCE LIQUID CHROMATOGRAPHY-MASS SPECTROMETRY	DUBBELS, R; REITER, RJ; KLENKE, E; GOEBEL, A; SCHNAKENBERG, E; EHLERS, C; SCHIWARA, HW; SCHLOOT, W	Melatonin, the chief hormone of the pineal gland in vertebrates, is widely distributed in the animal kingdom. Among many functions, melatonin synchronizes circadian and circannual rhythms, stimulates immune function, may increase life span, inhibits growth of cancer cells in vitro and cancer progression and promotion in vivo, and was recently shown to be a potent hydroxyl radical scavenger and an…	JOURNAL OF PINEAL RESEARCH	1995	10.1111/j.1600-079X.1995.tb00136.x	DUBBELS, R	SCHLOOT, W	8	0	0	0	0	0	0	0	0	0	0	0	0	0	0	0	0	0	0	0	0	0	0	1	1	0	0	0	0	1	0	0	0	0	0	0	0	0	0	0	0	0
IDENTIFICATION OF MELATONIN IN PLANTS AND ITS EFFECTS ON PLASMA MELATONIN LEVELS AND BINDING TO MELATONIN RECEPTORS IN VERTEBRATES	HATTORI, A; MIGITAKA, H; IIGO, M; ITOH, M; YAMAMOTO, K; OHTANIKANEKO, R; HARA, M; SUZUKI, T; REITER, RJ	Twenty-four edible plants were investigated for the presence of melatonin, heretofore considered to be a molecule found only in the animal kingdom. The amount of melatonin in different plants varied greatly with highest melatonin being present in plants of the rice family. Melatonin was identified by radioimmunoassay and verified by high performance liquid chromatography with fluorescence detecti…	BIOCHEMISTRY AND MOLECULAR BIOLOGY INTERNATIONAL	1995	1039-9712	HATTORI, A	REITER, RJ	9	0	0	0	0	0	0	0	0	0	0	0	0	0	0	0	0	0	0	0	0	0	0	0	0	0	0	0	0	0	0	0	0	0	0	0	0	0	0	0	0	0
Melatonin promotes water-stress tolerance, lateral root formation, and seed germination in cucumber (Cucumis sativus L.)	Zhang, Na; Zhao, Bing; Zhang, Hai-Jun; Weeda, Sarah; Yang, Chen; Yang, Zi-Cai; Ren, Shuxin; Guo, Yang-Dong	A comprehensive investigation was carried out to determine the changes that occurred in water-stressed cucumber (Cucumis sativus L.) in response to melatonin treatment. We examined the potential roles of melatonin during seed germination and root generation and measured its effect on reactive oxygen species (ROS) levels, antioxidant enzyme activities, and photosynthesis. Melatonin alleviated poly…	JOURNAL OF PINEAL RESEARCH	2013	10.1111/j.1600-079X.2012.01015.x	Zhang, Na	Guo, Yang-Dong	8	0	1	1	0	0	0	0	0	0	0	0	0	0	0	0	0	0	0	0	0	0	0	0	1	1	0	0	1	0	0	0	0	0	1	0	0	0	0	0	0	0
High levels of melatonin in the seeds of edible plants - Possible function in germ tissue protection	Manchester, LC; Tan, DX; Reiter, RJ; Park, W; Monis, K; Qi, WB	The seeds of plants represent the anlage of the next generation and are vital to their existence. Melatonin has been identified in the leaves and flowers of plants but not in seeds. In this study, we examined the seeds of 15 edible plants for the presence of melatonin which was extracted using cold ethanol. Melatonin was initially identified by radioimmunoassay and subsequently quantified and con…	LIFE SCIENCES	2000	10.1016/S0024-3205(00)00896-1	Manchester, LC	Qi, WB	6	1	1	1	0	0	0	0	0	0	0	0	0	0	0	0	0	0	0	0	0	0	0	0	1	0	0	0	0	0	0	0	1	0	0	0	0	0	0	0	0	0
The mitigation effects of exogenous melatonin on salinity-induced stress in Malus hupehensis	Li, Chao; Wang, Ping; Wei, Zhiwei; Liang, Dong; Liu, Changhai; Yin, Lihua; Jia, Dongfeng; Fu, Mingyang; Ma, Fengwang	As an indoleamine molecule, melatonin mediates many physiological processes in plants. We investigated its role in regulating growth, ion homeostasis, and the response to oxidative stress in Malus hupehensis Rehd. under high-salinity conditions. Stressed plants had reduced growth and a marked decline in their net photosynthetic rates and chlorophyll contents. However, pretreatment with 0.1 mu m m…	JOURNAL OF PINEAL RESEARCH	2012	10.1111/j.1600-079X.2012.00999.x	Li, Chao	Ma, Fengwang	9	0	1	1	1	0	0	0	0	0	0	0	0	0	0	0	0	0	0	0	0	0	0	0	0	0	1	0	0	0	0	0	0	0	1	0	0	0	0	0	0	0
Melatonin in walnuts: Influence on levels of melatonin and total antioxidant capacity of blood	Reiter, RJ; Manchester, LC; Tan, DX	Objective: We investigated whether melatonin is present in walnuts (Juglans regia L.) and, if so, tested whether eating walnuts influences melatonin levels and the total antioxidant status of the blood. Methods: Melatonin was extracted from walnuts and quantified by high-performance liquid chromatography. After feeding walnuts to rats, serum melatonin concentrations were measured using a radioimm…	NUTRITION	2005	10.1016/j.nut.2005.02.005	Reiter, RJ	Tan, DX	3	1	1	1	0	0	0	0	0	0	0	0	0	0	0	0	0	0	0	0	0	0	0	0	1	0	0	0	0	0	0	0	0	0	0	0	0	0	0	0	0	0
Delayed senescence of apple leaves by exogenous melatonin treatment: toward regulating the ascorbate-glutathione cycle	Wang, Ping; Yin, Lihua; Liang, Dong; Li, Chao; Ma, Fengwang; Yue, Zhiyong	The objectives of this study were to test the effects of exogenous melatonin on apple (Malus domestica Borkh. cv. Golden Delicious) leaves and investigate its possible physiological role in delaying leaf senescence. Detached leaves treated with 10 mm melatonin solutions clearly showed a slowing in their process of dark-induced senescence, as evidenced by both biochemical and molecular parameters.…	JOURNAL OF PINEAL RESEARCH	2012	10.1111/j.1600-079X.2011.00966.x	Wang, Ping	Yue, Zhiyong	6	0	1	1	1	0	0	0	0	0	0	0	0	0	0	0	0	0	0	0	0	0	0	0	1	1	1	0	0	0	0	1	0	0	1	0	0	0	1	0	0	0
Long-term exogenous application of melatonin delays drought-induced leaf senescence in apple	Wang, Ping; Sun, Xun; Li, Chao; Wei, Zhiwei; Liang, Dong; Ma, Fengwang	To examine the potential roles of melatonin in drought tolerance, we tested the effects of its long-term exogenous application on Hanfu' apple (Malus domestica Borkh.). When 100m melatonin was added to soils under drought conditions, the resultant oxidative stress was eased and leaf senescence was delayed. This molecule significantly reduced chlorophyll degradation and suppressed the up-regulatio…	JOURNAL OF PINEAL RESEARCH	2013	10.1111/jpi.12017	Wang, Ping	Ma, Fengwang	6	0	1	1	1	0	0	0	0	0	0	0	0	0	0	0	0	0	0	0	0	0	0	0	0	0	1	0	0	0	0	1	1	0	1	0	0	0	1	0	0	0
Comparative physiological, metabolomic, and transcriptomic analyses reveal mechanisms of improved abiotic stress resistance in bermudagrass [Cynodon dactylon (L). Pers.] by exogenous melatonin	Shi, Haitao; Jiang, Chuan; Ye, Tiantian; Tan, Dun-Xian; Reiter, Russel J.; Zhang, Heng; Liu, Renyi; Chan, Zhulong	Melatonin (N-acetyl-5-methoxytryptamine), a well-known animal hormone, is also involved in plant development and abiotic stress responses. In this study, it is shown that exogenous application of melatonin conferred improved salt, drought, and cold stress resistances in bermudagrass. Moreover, exogenous melatonin treatment alleviated reactive oxygen species (ROS) burst and cell damage induced by …	JOURNAL OF EXPERIMENTAL BOTANY	2015	10.1093/jxb/eru373	Shi, Haitao	Chan, Zhulong	8	0	1	1	1	0	0	0	0	0	0	0	0	0	0	0	0	0	0	0	0	0	0	1	1	1	0	0	0	0	0	0	0	0	0	0	0	0	0	0	0	0
Melatonin enhances plant growth and abiotic stress tolerance in soybean plants	Wei, Wei; Li, Qing-Tian; Chu, Ya-Nan; Reiter, Russel J.; Yu, Xiao-Min; Zhu, Dan-Hua; Zhang, Wan-Ke; Ma, Biao; Lin, Qing; Zhang, Jin-Song; Chen, Shou-Yi	Melatonin is a well-known agent that plays multiple roles in animals. Its possible function in plants is less clear. In the present study, we tested the effect of melatonin (N-acetyl-5-methoxytryptamine) on soybean growth and development. Coating seeds with melatonin significantly promoted soybean growth as judged from leaf size and plant height. This enhancement was also observed in soybean prod…	JOURNAL OF EXPERIMENTAL BOTANY	2015	10.1093/jxb/eru392	Wei, Wei	Chen, Shou-Yi	11	0	1	1	0	0	0	0	0	0	0	0	0	0	0	0	0	0	0	0	0	0	0	1	0	0	0	0	0	0	0	0	0	0	0	0	0	0	0	0	0	0
Melatonin promotes seed germination under high salinity by regulating antioxidant systems, ABA and GA(4) interaction in cucumber (Cucumis sativus L.)	Zhang, Hai-Jun; Zhang, Na; Yang, Rong-Chao; Wang, Li; Sun, Qian-Qian; Li, Dian-Bo; Cao, Yun-Yun; Weeda, Sarah; Zhao, Bing; Ren, Shuxin; Guo, Yang-Dong	Although previous studies have found that melatonin can promote seed germination, the mechanisms involved in perceiving and signaling melatonin remain poorly understood. In this study, it was found that melatonin was synthesized during cucumber seed germination with a peak in melatonin levels occurring 14 hr into germination. This is indicative of a correlation between melatonin synthesis and see…	JOURNAL OF PINEAL RESEARCH	2014	10.1111/jpi.12167	Zhang, Hai-Jun	Guo, Yang-Dong	11	0	1	1	1	0	0	0	0	0	0	0	0	0	0	0	0	0	0	0	0	0	0	0	1	0	0	0	1	0	0	0	0	0	0	0	0	0	0	1	0	0
Melatonin acts as a growth-stimulating compound in some monocot species	Hernandez-Ruiz, J; Cano, A; Arnao, MB	In a recent study melatonin (N-acetyl-5-methoxytryptamine), a well-investigated animal molecule but minimally studied in plants, was seen to have a physiological role as growth-promoting molecule in lupin hypocotyls. In the present study, the role of melatonin as a growth promoter is extended to coleoptiles of canary grass, wheat, barley and oat, in which it shows a relative auxinic activity [wit…	JOURNAL OF PINEAL RESEARCH	2005	10.1111/j.1600-079X.2005.00226.x	Hernandez-Ruiz, J	Arnao, MB	3	0	1	1	0	0	0	0	0	0	0	0	0	0	0	0	0	0	0	0	0	0	0	0	0	0	0	0	0	0	0	0	0	0	0	0	0	0	0	0	0	0
Melatonin: a growth-stimulating compound present in lupin tissues	Hernandez-Ruiz, J; Cano, A; Arnao, MB	Melatonin (N-acetyl-5-methoxi-tryptamine), a well-known animal hormone synthetised by the pineal gland, plays a key role in the circadian rhythm of vertebrates. An exhaustive bibliographical revision of studies on melatonin in plants published since 1990 points to very few studies (around 20), of which only 8 have a clear plant physiological focus. The data presented in this study demonstrate tha…	PLANTA	2004	10.1007/s00425-004-1317-3	Hernandez-Ruiz, J	Arnao, MB	3	0	1	0	0	0	0	0	0	0	0	0	0	0	0	0	0	0	0	0	0	0	0	0	0	0	0	0	0	1	0	0	0	0	0	0	0	0	0	0	0	0
Tryptophan is a precursor for melatonin and serotonin biosynthesis in in vitro regenerated St. John's wort (Hypericum perforatum L. cv. Anthos) plants	Murch, SJ; KrishnaRaj, S; Saxena, PK	Evidence of a pathway for the biosynthesis of the mammalian neurohormones melatonin and serotonin in in vitro regenerated plantlets of St. John's wort (Hypericum perforatum cv. Anthos) is presented. Isotope tracer experiments were performed on plantlets regenerated from thidiazuron-induced stem explants and grown on MS basal medium for 2 months. Radiolabel from C-14-tryptophan was recovered as C-…	PLANT CELL REPORTS	2000	10.1007/s002990000206	Murch, SJ	Saxena, PK	3	1	1	0	0	0	0	0	0	0	0	0	0	0	0	0	0	0	0	0	0	0	0	0	0	0	0	0	0	0	0	0	1	0	0	0	0	0	0	0	0	0
Role of melatonin in alleviating cold stress in Arabidopsis thaliana	Bajwa, Vikramjit S.; Shukla, Mukund R.; Sherif, Sherif M.; Murch, Susan J.; Saxena, Praveen K.	Melatonin (N-acetyl-5-methoxytryptamine) has been implicated in abiotic and biotic stress tolerance in plants. However, information on the effects of melatonin in cold-stress tolerance in vivo is limited. In this study, the effect of melatonin was investigated in the model plant Arabidopsis thaliana challenged with a cold stress at 4 degrees C for 72 and 120hr. Melatonin-treated plants (10 and 30…	JOURNAL OF PINEAL RESEARCH	2014	10.1111/jpi.12115	Bajwa, Vikramjit S.	Saxena, Praveen K.	5	1	1	1	1	0	0	0	0	0	0	0	0	0	0	0	0	0	0	0	0	0	0	0	1	1	0	0	0	0	0	0	0	0	0	0	0	0	0	0	0	0
Protective effect of melatonin against chlorophyll degradation during the senescence of barley leaves	Arnao, M. B.; Hernandez-Ruiz, J.	Melatonin (N-acetyl-5-methoxytryptamine) is a highly conserved molecule whose presence is not exclusive to the animal kingdom. Indeed, numerous studies have demonstrated its presence in plants, where the possible role(s) of this indoleamine is (are) under active investigation. The present work aims to further our knowledge in this respect and presents the results of a study of the effect that mel…	JOURNAL OF PINEAL RESEARCH	2009	10.1111/j.1600-079X.2008.00625.x	Arnao, M. B.	Hernandez-Ruiz, J.	2	0	0	0	1	1	0	0	0	0	0	0	0	0	0	0	0	0	0	0	0	0	0	0	0	0	0	0	0	0	0	1	0	0	1	0	0	0	1	1	0	0
Melatonin in Chinese medicinal herbs	Chen, GF; Huo, YS; Tan, DX; Liang, Z; Zhang, WB; Zhang, YK	Melatonin is a highly conserved molecule that not only exists in animals, but also is present in bacteria, unicellular organisms and in plants. Since melatonin is an antioxidant, in plants melatonin was speculated to protect them from intrinsic and environmental oxidative stress. More importantly, melatonin in edible plants inevitably enters animals and human through feed and food. In this study,…	LIFE SCIENCES	2003	10.1016/S0024-3205(03)00252-2	Chen, GF	Zhang, YK	6	1	1	1	0	0	0	0	0	0	0	0	0	0	0	0	0	0	0	0	0	0	0	0	1	0	0	0	0	0	0	0	0	0	0	0	0	0	0	0	0	0
Exogenously applied melatonin stimulates root growth and raises endogenous indoleacetic acid in roots of etiolated seedlings of Brassica juncea	Chen, Qian; Qi, Wen-bo; Reiter, Russel J.; Wei, Wei; Wang, Bao-min	Exogenous melatonin was applied to etiolated seedlings of wild leaf mustard (Brassica juncea) and the effect on root growth and endogenous indole-3-acetic acid (IAA) levels determined. The results show that 0.1 mu M melatonin has a stimulatory effect on root growth, while 100 mu M is inhibitory. Furthermore, the stimulatory effect was only detectable in young seedlings (2-d old). Older seedlings …	JOURNAL OF PLANT PHYSIOLOGY	2009	10.1016/j.jplph.2008.06.002	Chen, Qian	Wang, Bao-min	5	0	0	1	1	1	0	0	0	0	0	0	0	0	0	0	0	0	0	0	0	0	0	0	0	0	0	0	0	0	0	0	0	0	0	0	0	0	0	0	0	0
Melatonin promotes adventitious- and lateral root regeneration in etiolated hypocotyls of Lupinus albus L.	Arnao, Marino B.; Hernandez-Ruiz, Josefa	Melatonin is a well-known animal substance, which has recently been detected in plant tissues. However, there are only a few studies concerning its possible physiological role in plants. In this paper, we investigate the possible effect of melatonin on the regeneration of lateral and adventious roots in etiolated hypocotyls of Lupinus albus L. compared with the effect of indole-3-acetic acid. We …	JOURNAL OF PINEAL RESEARCH	2007	10.1111/j.1600-079X.2006.00396.x	Arnao, Marino B.	Hernandez-Ruiz, Josefa	2	0	1	0	1	0	0	0	0	0	0	0	0	0	0	0	0	0	0	0	0	0	0	0	0	1	0	0	0	0	0	0	0	0	0	0	0	0	0	0	0	0
Detection and quantification of the antioxidant melatonin in montmorency and balaton tart cherries (Prunus cerasus)	Burkhardt, S; Tan, DX; Manchester, LC; Hardeland, R; Reiter, RJ	The antioxidant melatonin was recently identified in a variety of edible plants and seeds in high concentrations. In plants, as in animals, melatonin is believed to function as a free radical scavenger and possibly in photoperiodism. In this study, melatonin was detected and quantified in fresh-frozen Balaton and Montmorency tart cherries (Prunus cerasus) using high-performance liquid chromatogra…	JOURNAL OF AGRICULTURAL AND FOOD CHEMISTRY	2001	10.1021/jf010321+	Burkhardt, S	Reiter, RJ	5	0	1	1	0	1	0	0	0	0	0	0	0	0	0	0	0	0	0	0	0	0	0	0	1	0	0	0	0	0	0	0	0	0	0	0	0	0	0	0	0	0
Presowing seed treatment with melatonin protects red cabbage seedlings against toxic copper ion concentrations	Posmyk, Malgorzata M.; Kuran, Hanna; Marciniak, Kazimierz; Janas, Krystyna M.	One of the targets of modern plant physiology is to identify tools for improving seed germination and plant growth under unfavorable environmental conditions. Seeds of Brassica oleracea rubrum were pretreated with melatonin at concentrations: 1, 10, and 100 mu M using a hydropriming method. Air-dried seeds of each experimental variants that were nonpretreated (control), hydroprimed (H) or hydropr…	JOURNAL OF PINEAL RESEARCH	2008	10.1111/j.1600-079X.2007.00552.x	Posmyk, Malgorzata M.	Janas, Krystyna M.	4	0	0	0	0	0	0	0	0	0	0	0	0	0	0	0	0	0	0	0	0	0	0	0	0	0	0	0	0	0	0	0	1	0	0	0	0	0	0	0	0	0
Melatonin in Glycyrrhiza uralensis: response of plant roots to spectral quality of light and UV-B radiation	Afreen, F.; Zobayed, S. M. A.; Kozai, T.	Melatonin (N-acetyl-5-methoxytryptamine) is known to be synthesized and secreted by the pineal gland in vertebrates. Evidence for the occurrence of melatonin in the roots of Glycyrrhiza uralensis plants and the response of this plant to the spectral quality of light including red, blue and white light (control) and UV-B radiation (280-315 nm) for the synthesis of melatonin were investigated. Mela…	JOURNAL OF PINEAL RESEARCH	2006	10.1111/j.1600-079X.2006.00337.x	Afreen, F.	Kozai, T.	3	0	1	1	0	0	0	0	0	0	0	0	0	0	0	0	0	0	0	0	0	0	0	0	0	0	0	0	0	0	0	0	1	1	0	0	0	0	0	0	0	0
Exogenous melatonin improves Malus resistance to Marssonina apple blotch	Yin, Lihua; Wang, Ping; Li, Mingjun; Ke, Xiwang; Li, Cuiying; Liang, Dong; Wu, Shan; Ma, Xinli; Li, Chao; Zou, Yangjun; Ma, Fengwang	We examined whether exogenously applied melatonin could improve resistance to Marssonina apple blotch (Diplocarpon mali) by apple [Malus prunifolia (Willd.) Borkh. cv. Donghongguo]. This serious disease leads to premature defoliation in the main regions of apple production. When plants were pretreated with melatonin, resistance was increased in the leaves. We investigated the potential roles for …	JOURNAL OF PINEAL RESEARCH	2013	10.1111/jpi.12038	Yin, Lihua	Ma, Fengwang	11	0	0	0	1	0	0	0	0	0	0	0	0	0	0	0	0	0	0	0	0	0	0	0	1	0	1	0	0	0	0	0	0	0	0	0	0	0	0	0	0	0
Mechanistic and comparative studies of melatonin and classic antioxidants in terms of their interactions with the ABTS cation radical	Tan, DX; Hardeland, R; Manchester, LC; Poeggeler, B; Lopez-Burillo, S; Mayo, JC; Sainz, RM; Reiter, RJ	Melatonin and classic antioxidants possess the capacity to scavenge ABTS(b+) with IC50 s of 4, 11, 15.5, 15.5, 17 and 21 mu m for melatonin, glutathione, vitamin C, trolox, NADH and NADPH, respectively. In terms of scavenging ABTS(b+) , melatonin exhibits a different profile than that of the classic antioxidants. Classic antioxidants scavenge one or less ABTS(b+) , while each melatonin molecule c…	JOURNAL OF PINEAL RESEARCH	2003	10.1034/j.1600-079X.2003.00037.x	Tan, DX	Reiter, RJ	8	0	1	1	0	0	0	1	1	0	0	0	1	0	0	0	1	0	0	0	0	0	0	0	1	0	0	0	0	0	0	0	0	0	0	0	0	0	0	0	0	0
The RNA-seq approach to discriminate gene expression profiles in response to melatonin on cucumber lateral root formation	Zhang, Na; Zhang, Hai-Jun; Zhao, Bing; Sun, Qian-Qian; Cao, Yun-Yun; Li, Ren; Wu, Xin-Xin; Weeda, Sarah; Li, Li; Ren, Shuxin; Reiter, Russel J.; Guo, Yang-Dong	Cucumber is a model cucurbitaceous plant with a known genome sequence which is important for studying molecular mechanisms of root development. In this study, RNA sequencing was employed to explore the mechanism of melatonin-induced lateral root formation in cucumber under salt stress. Three groups of seeds were examined, that is, seeds primed without melatonin (CK), seeds primed in a solution co…	JOURNAL OF PINEAL RESEARCH	2014	10.1111/jpi.12095	Zhang, Na	Guo, Yang-Dong	12	0	0	0	0	0	0	0	0	0	0	0	0	0	0	0	0	0	0	0	0	0	0	0	0	0	0	0	0	0	0	0	0	0	0	0	0	0	0	0	0	0
Melatonin applied to cucumber (Cucumis sativus L.) seeds improves germination during chilling stress	Posmyk, Malgorzata M.; Balabusta, M.; Wieczorek, M.; Sliwinska, E.; Janas, K. M.	The relationship between germination and melatonin applied during osmo- and hydropriming was studied in cucumber seeds. The proportion of nuclei with different DNA contents, the mean ploidy and the (2C + 4C = 8C)/2C ratio in unprimed and primed, dry and imbibed at 10 degrees C seeds were established by flow cytometry. Thiobarbituric acid reactive substances and protein oxidation were also estimat…	JOURNAL OF PINEAL RESEARCH	2009	10.1111/j.1600-079X.2008.00652.x	Posmyk, Malgorzata M.	Janas, K. M.	5	1	1	0	0	0	0	0	0	0	0	0	0	0	0	0	0	0	0	0	0	0	0	0	0	0	0	0	0	0	0	0	1	0	0	0	0	0	0	0	0	0
Melatonin mediates the regulation of ABA metabolism, free-radical scavenging, and stomatal behaviour in two Malus species under drought stress	Li, Chao; Tan, Dun-Xian; Liang, Dong; Chang, Cong; Jia, Dongfeng; Ma, Fengwang	Melatonin pre-treatment significantly increases the tolerance of both drought-tolerant Malus prunifolia and drought-sensitive M. hupehensis plants. Its beneficial effects include better water conservation in leaves, less electrolyte leakage, steady chlorophyll contents, and greater photosynthetic performance under stress conditions. Melatonin selectively down-regulates MdNCED3, an abscisic acid (…	JOURNAL OF EXPERIMENTAL BOTANY	2015	10.1093/jxb/eru476	Li, Chao	Ma, Fengwang	6	0	0	0	0	0	0	0	0	0	0	0	0	0	0	0	0	0	0	0	0	0	0	1	1	0	1	0	0	0	0	0	0	0	1	0	0	0	0	1	0	0
Melatonin and its potential biological functions in the fruits of sweet cherry	Zhao, Yu; Tan, Dun-Xian; Lei, Qiong; Chen, Hao; Wang, Lin; Li, Qing-tian; Gao, Yinan; Kong, Jin	Melatonin is a well-known molecule which possesses many beneficial effects on human health. Many agriculture products provide natural melatonin in the diet. Cherry is one such fruit as they are rich in melatonin. In order to understand the biological roles of melatonin in cherry fruit, melatonin synthesis and its changes over 24hr period were systematically monitored both during their development…	JOURNAL OF PINEAL RESEARCH	2013	10.1111/jpi.12044	Zhao, Yu	Kong, Jin	8	1	1	1	0	0	0	0	0	0	0	0	0	0	0	0	0	0	0	0	0	0	0	0	1	0	0	1	0	0	0	0	1	0	0	0	0	0	0	0	0	0
Novel rhythms of N-1-acetyl-N-2-formyl-5-methoxykynuramine and its precursor melatonin in water hyacinth: importance for phytoremediation	Tan, Dun-Xian; Manchester, Lucien C.; Di Mascio, Paolo; Martinez, Glaucia R.; Prado, Fernanda M.; Reiter, Russel J.	N-1-acetyl- N-2-formyl-5-methoxykynuramine (AMFK) is a major metabolite of melatonin in mammals. To investigate whether AFMK exists in plants, an aquatic plant, water hyacinth, was used. To achieve this, LC/MS/MS with a deuterated standard was employed. AFMK was identified in any plant for the first time. Both it and its precursor, melatonin, were rhythmic with peaks during the late light phase. …	FASEB JOURNAL	2007	10.1096/fj.06-7745com	Tan, Dun-Xian	Reiter, Russel J.	6	0	1	1	0	1	0	0	0	0	0	0	0	0	0	0	1	0	0	0	0	0	0	0	0	0	0	0	0	1	0	0	1	0	0	0	0	0	0	0	0	0
Arabidopsis Transcriptome Analysis Reveals Key Roles of Melatonin in Plant Defense Systems	Weeda, Sarah; Zhang, Na; Zhao, Xiaolei; Ndip, Grace; Guo, Yangdong; Buck, Gregory A.; Fu, Conggui; Ren, Shuxin	Melatonin is a ubiquitous molecule and exists across kingdoms including plant species. Studies on melatonin in plants have mainly focused on its physiological influence on growth and development, and on its biosynthesis. Much less attention has been drawn to its affect on genome-wide gene expression. To comprehensively investigate the role(s) of melatonin at the genomics level, we utilized mRNA-s…	PLOS ONE	2014	10.1371/journal.pone.0093462	Weeda, Sarah	Ren, Shuxin	8	0	1	1	0	0	0	0	0	0	0	0	0	0	0	0	0	0	0	0	0	0	0	0	0	1	0	0	0	0	0	0	0	0	0	0	0	0	0	0	0	0
Melatonin promotes ripening and improves quality of tomato fruit during postharvest life	Sun, Qianqian; Zhang, Na; Wang, Jinfang; Zhang, Haijun; Li, Dianbo; Shi, Jin; Li, Ren; Weeda, Sarah; Zhao, Bing; Ren, Shuxin; Guo, Yang-Dong	In this study, the effect of melatonin on the postharvest ripening and quality improvement of tomato fruit was carried out. The tomatoes were immersed in exogenous melatonin for 2 h, and then the related physiological indicators and the expression of genes during post-harvest life were evaluated. Compared with control check (CK), the 50 mu M melatonin treatment significantly increased lycopene le…	JOURNAL OF EXPERIMENTAL BOTANY	2015	10.1093/jxb/eru332	Sun, Qianqian	Guo, Yang-Dong	11	0	1	1	1	0	0	0	0	0	0	0	0	0	0	0	0	0	0	0	0	0	0	0	0	0	0	0	0	0	0	0	0	0	0	1	0	0	0	0	0	0
Melatonin-rich transgenic rice plants exhibit resistance to herbicide-induced oxidative stress	Park, Sangkyu; Lee, Da-Eun; Jang, Hyunki; Byeon, Yeong; Kim, Young-Soon; Back, Kyoungwhan	To examine whether melatonin-rich plants can defend against oxidative stress, we subjected melatonin-rich transgenic (MRT) rice plants to the singlet-oxygen-generating herbicide butafenacil. Both MRT and transgenic control (TC; expressing the vector only) rice seeds germinated and grew equally well in continuous dark on half-strength Murashige and Skoog (MS) medium containing 0.1m butafenacil. Ho…	JOURNAL OF PINEAL RESEARCH	2013	10.1111/j.1600-079X.2012.01029.x	Park, Sangkyu	Back, Kyoungwhan	6	0	1	1	0	0	1	0	0	0	0	0	0	0	0	0	0	0	0	0	0	0	0	0	0	1	1	1	1	0	0	0	1	0	1	0	0	0	0	0	0	0
Melatonin immunoreactivity in the photosynthetic prokaryote Rhodospirillum rubrum: Implications for an ancient antioxidant system	Manchester, LC; Poeggeler, B; Alvares, FL; Ogden, GB; Reiter, RJ		CELLULAR & MOLECULAR BIOLOGY RESEARCH	1995		Manchester, LC	Reiter, RJ	5	0	0	0	0	0	0	0	0	0	0	0	0	0	0	0	0	0	0	0	0	0	0	0	1	0	0	0	0	0	0	0	0	0	0	0	0	0	0	0	0	0
Melatonin delays leaf senescence and enhances salt stress tolerance in rice	Liang, Chengzhen; Zheng, Guangyong; Li, Wenzhen; Wang, Yiqin; Hu, Bin; Wang, Hongru; Wu, Hongkai; Qian, Yangwen; Zhu, Xin-Guang; Tan, Dun-Xian; Chen, Shou-Yi; Chu, Chengcai	Melatonin, an antioxidant in both animals and plants, has been reported to have beneficial effects on the aging process. It was also suggested to play a role in extending longevity and enhancing abiotic stress resistance in plant. In this study, we demonstrate that melatonin acts as a potent agent to delay leaf senescence and cell death in rice. Treatments with melatonin significantly reduced chl…	JOURNAL OF PINEAL RESEARCH	2015	10.1111/jpi.12243	Liang, Chengzhen	Chu, Chengcai	12	0	1	1	1	0	0	0	0	0	0	0	0	0	0	0	0	0	0	0	0	0	0	0	1	0	1	0	0	0	0	1	0	0	1	0	0	0	1	0	0	0
Melatonin regulates Arabidopsis root system architecture likely acting independently of auxin signaling	Pelagio-Flores, Ramon; Munoz-Parra, Edith; Ortiz-Castro, Randy; Lopez-Bucio, Jose	Melatonin (N-acetyl-5-methoxytryptamine) is a tryptophan-derived signal with important physiological roles in mammals. Although the presence of melatonin in plants may be universal, its endogenous function in plant tissues is unknown. On the basis of its structural similarity to indole-3-acetic acid, recent studies mainly focusing on root growth in several plant species have suggested a potential…	JOURNAL OF PINEAL RESEARCH	2012	10.1111/j.1600-079X.2012.00996.x	Pelagio-Flores, Ramon	Lopez-Bucio, Jose	4	0	1	1	0	1	0	0	0	0	0	0	0	0	0	0	0	0	0	0	0	0	0	0	0	0	0	0	0	0	0	0	0	0	0	0	0	0	0	0	0	0
Enhanced production of melatonin by ectopic overexpression of human serotonin N-acetyltransferase plays a role in cold resistance in transgenic rice seedlings	Kang, Kiyoon; Lee, Kyungjin; Park, Sangkyu; Kim, Young Soon; Back, Kyoungwhan	Serotonin N-acetyltransferase (SNA), a rate-limiting enzyme in melatonin biosynthesis in vertebrates, is responsible for the production of N-acetylserotonin; this molecule is then converted to melatonin by hydroxyindole-O-methyltransferase. We generated transgenic rice plants via expression of the human SNA gene under the constitutive ubiquitin promoter using Agrobacterium-mediated gene transform…	JOURNAL OF PINEAL RESEARCH	2010	10.1111/j.1600-079X.2010.00783.x	Kang, Kiyoon	Back, Kyoungwhan	5	0	1	1	1	1	1	0	0	0	0	0	0	0	0	0	0	0	0	0	0	0	0	0	0	0	0	0	0	0	0	0	0	0	1	0	0	0	0	0	0	0
Chemical profile and antioxidant capacities of tart cherry products	Kirakosyan, Ara; Seymour, E. M.; Llanes, Daniel E. Urcuyo; Kaufman, Peter B.; Bolling, Steven F.	The levels of anthocyanins and other flavonoids, as well as melatonin, in various tart cherry products (frozen and dried cherries, powders from individually quick frozen (IQF) cherry and juice concentrate) from two tart cherry cultivars,'Montmorency' and 'Balaton' were analysed comparatively by HPLC and electrospray mass spectrometry (EMS). Our results show that the major anthocyanin compound in …	FOOD CHEMISTRY	2009	10.1016/j.foodchem.2008.11.042	Kirakosyan, Ara	Bolling, Steven F.	5	0	0	0	0	0	0	0	0	0	0	0	0	0	0	0	0	0	0	0	0	0	0	0	1	1	0	0	0	0	0	0	0	0	0	0	0	1	0	0	0	0
The ameliorative effects of exogenous melatonin on grape cuttings under water-deficient stress: antioxidant metabolites, leaf anatomy, and chloroplast morphology	Meng, Jiang-Fei; Xu, Teng-Fei; Wang, Zhi-Zhen; Fang, Yu-Lin; Xi, Zhu-Mei; Zhang, Zhen-Wen	Grapes are an important economic crop and are widely cultivated around the world. Most grapes are grown in arid or semi-arid regions, and droughts take a heavy toll in grape and wine production areas. Developing effective drought-resistant cultivation measures is a priority for viticulture. Melatonin, an indoleamine, mediates many physiological processes in plants. Herein, we examined whether exo…	JOURNAL OF PINEAL RESEARCH	2014	10.1111/jpi.12159	Meng, Jiang-Fei	Zhang, Zhen-Wen	6	0	1	1	1	0	0	0	0	0	0	0	0	0	0	0	0	0	0	0	0	0	0	0	1	0	1	0	0	0	0	0	0	0	1	0	0	0	0	0	0	0
Melatonin: Occurrence and daily rhythm in Chenopodium rubrum	Kolar, J; Machackova, I; Eder, J; Prinsen, E; VanDongen, W; VanOnckelen, H; Illnerova, H	The occurrence of melatonin (5-methoxy-N-acetyltryptamine), a common animal hormone, in extracts of the above-ground parts of 15-day-old plants of Chenopodium rubrum was confirmed by liquid chromatography/tandem mass spectrometry. Using both this method and radioimmunoassay, changes in melatonin content during a 12 hr light/12 hr dark cycle were demonstrated. The melatonin concentration remained …	PHYTOCHEMISTRY	1997	10.1016/S0031-9422(96)00568-7	Kolar, J	Illnerova, H	7	0	1	0	0	0	0	0	0	0	0	0	0	0	0	0	0	0	0	0	0	0	0	0	0	0	0	0	0	1	0	0	1	0	0	0	0	0	0	0	0	0
Melatonin induces nitric oxide and the potential mechanisms relate to innate immunity against bacterial pathogen infection in Arabidopsis	Shi, Haitao; Chen, Yinhua; Tan, Dun-Xian; Reiter, Russel J.; Chan, Zhulong; He, Chaozu	Melatonin (N-acetyl-5-methoxytryptamine) is a naturally occurring small molecule, serving as important secondary messenger in the response of plants to various biotic and abiotic stresses. However, the interactions between melatonin and other important molecules in the plant stress response, especially in plant immunity, are largely unknown. In this study, we found that both melatonin and nitric …	JOURNAL OF PINEAL RESEARCH	2015	10.1111/jpi.12244	Shi, Haitao	He, Chaozu	6	0	1	1	1	1	0	0	0	0	0	0	0	0	0	0	0	0	0	0	0	0	0	0	0	0	0	0	0	0	0	0	0	0	0	0	0	0	0	0	0	1
Melatonin as a signal molecule triggering defense responses against pathogen attack in Arabidopsis and tobacco	Lee, Hyoung Yool; Byeon, Yeong; Back, Kyoungwhan	Melatonin plays pleiotropic roles in both animals and plants. The possible role of melatonin in plant innate immune responses was recently discovered. As an initial study, we employed Arabidopsis to determine whether melatonin is involved in defense against the virulent bacterial pathogen Pseudomonas syringae DC3000. The application of a 10 mu M concentration of melatonin on Arabidopsis and tobac…	JOURNAL OF PINEAL RESEARCH	2014	10.1111/jpi.12165	Lee, Hyoung Yool	Back, Kyoungwhan	3	0	1	1	0	0	0	0	0	0	0	0	0	0	0	0	0	0	0	0	0	0	0	0	0	0	0	0	0	0	0	0	0	0	0	0	0	0	0	0	0	1
Melatonin in plant organs	Van Tassel, DL; Roberts, N; Lewy, A; O'Neill, SD	The indoleamine melatonin, a well-known animal chemical, has been identified in extracts from several plant species. The function of melatonin in plants is unknown. Two major functions of melatonin in animals are dark signaling and antioxidant protection. Fruit ripening was used as a model physiological process that involves changes in the oxidative status of an organ. Tomato fruits at various st…	JOURNAL OF PINEAL RESEARCH	2001	10.1034/j.1600-079X.2001.310102.x	Van Tassel, DL	O'Neill, SD	4	0	1	0	0	0	0	0	0	0	0	0	0	0	0	0	0	0	0	0	0	0	0	0	1	0	0	0	0	0	0	0	1	0	0	0	0	0	0	0	0	0
The cysteine2/histidine2-type transcription factor ZINC FINGER OF ARABIDOPSIS THALIANA 6-activated C-REPEAT-BINDING FACTOR pathway is essential for melatonin-mediated freezing stress resistance in Arabidopsis	Shi, Haitao; Chan, Zhulong	Melatonin (N-acetyl-5-methoxytryptamine) is not only a widely known animal hormone, but also an important regulator in plant development and multiple abiotic stress responses. Recently, it has been revealed that melatonin alleviated cold stress through mediating several cold-related genes, including C-REPEAT-BINDING FACTORs (CBFs)/Drought Response Element Binding factors (DREBs), COR15a, and thre…	JOURNAL OF PINEAL RESEARCH	2014	10.1111/jpi.12155	Shi, Haitao	Chan, Zhulong	2	0	1	1	1	1	0	0	0	0	0	0	0	0	0	0	0	0	0	0	0	0	0	0	0	0	0	0	0	0	0	0	0	0	0	0	0	0	0	0	0	0
Overexpression of MzASMT improves melatonin production and enhances drought tolerance in transgenic Arabidopsis thaliana plants	Zuo, Bixiao; Zheng, Xiaodong; He, Pingli; Wang, Lin; Lei, Qiong; Feng, Chao; Zhou, Jingzhe; Li, Qingtian; Han, Zhenhai; Kong, Jin	Melatonin is a potent naturally occurring reactive oxygen species (ROS) and reactive nitrogen species (RNS) scavenger in plants. Melatonin protects plants from oxidative stress and, therefore, it improves their tolerance against a variety of environmental abiotic stressors. N-acetylserotonin-O-methyltransferase (ASMT) is a specific enzyme required for melatonin synthesis. In this report, an ASMT …	JOURNAL OF PINEAL RESEARCH	2014	10.1111/jpi.12180	Zuo, Bixiao	Kong, Jin	10	1	1	1	0	0	1	0	0	0	0	0	0	0	0	0	0	0	0	0	0	0	0	0	0	1	0	0	0	0	0	0	1	0	0	0	0	0	0	0	0	0
Melatonin promotes adventitious root regeneration in in vitro shoot tip explants of the commercial sweet cherry rootstocks CAB-6P (Prunus cerasus L.), Gisela 6 (P. cerasus P. canescens), and MxM 60 (P. avium P. mahaleb).	Sarropoulou, Virginia N.; Therios, Ioannis N.; Dimassi-Theriou, Kortessa N.	The objectives of this study were to test the effects of melatonin (N-acetyl-5-methoxytryptamine), a natural compound of edible plants on the rooting of certain commercial sweet cherry rootstocks. Shoot tip explants from previous in vitro cultures of the cherry rootstocks CAB-6P (Prunus cerasus L.), Gisela 6 (P.similar to cerasus x P.similar to canescens), and M x M 60 (P.similar to avium x P.sim…	JOURNAL OF PINEAL RESEARCH	2012	10.1111/j.1600-079X.2011.00914.x	Sarropoulou, Virginia N.	Dimassi-Theriou, Kortessa N.	3	0	1	1	1	0	0	0	0	0	0	0	0	0	0	0	0	0	0	0	0	0	0	0	0	0	0	0	0	0	0	0	0	0	0	0	0	0	0	0	0	0
Chemical stress by different agents affects the melatonin content of barley roots	Arnao, Marino B.; Hernandez-Ruiz, Josefa	The presence of melatonin (N-acetyl-5-methoxytryptamine) in plants has been clearly demonstrated. However, while this indoleamine has been intensively studied in animals, especially in mammals, the same is not true in the case of plants, where one of the most interesting aspects is its possible role as antioxidative molecule in physiological processes. Some data reflect the possible protective ro…	JOURNAL OF PINEAL RESEARCH	2009	10.1111/j.1600-079X.2008.00660.x	Arnao, Marino B.	Hernandez-Ruiz, Josefa	2	0	1	1	0	0	0	0	0	0	0	0	0	0	0	0	0	0	0	0	0	0	0	0	0	0	1	0	0	0	0	0	1	1	0	0	0	0	1	0	0	0
The role of serotonin and melatonin in plant morphogenesis: Regulation of auxin-induced root organogenesis in in vitro-cultured explants of St. John's wort (Hypericum perforatum L.)	Murch, SJ; Campbell, SSB; Saxena, PK	St. John's wort (Hypericum perforatum cv. Anthos) is a medicinal plant with historical and anecdotal evidence of efficacy as an anti-depressant. Recent research has demonstrated an active biosynthetic pathway leading to the production of the mammalian neurohormone melatonin in St. John's wort plantlets. The objective of the current study with to assess the physiological role of melatonin and rela…	IN VITRO CELLULAR & DEVELOPMENTAL BIOLOGY-PLANT	2001		Murch, SJ	Saxena, PK	3	0	0	0	0	1	0	0	0	0	0	0	0	0	0	0	0	0	0	0	0	0	0	0	0	0	0	0	0	0	0	0	0	0	0	0	0	0	0	0	0	0
Melatonin mitigates cadmium phytotoxicity through modulation of phytochelatins biosynthesis, vacuolar sequestration, and antioxidant potential in Solanum lycopersicum L	Hasan, Md. Kamrul; Ahammed, Golam Jalal; Yin, Lingling; Shi, Kai; Xia, Xiaojian; Zhou, Yanhong; Yu, Jingquan; Zhou, Jie	Melatonin is a ubiquitous signal molecule, playing crucial roles in plant growth and stress tolerance. Recently, toxic metal cadmium (Cd) has been reported to regulate melatonin content in rice; however, the function of melatonin under Cd stress, particularly in higher plants, still remains elusive. Here, we show that optimal dose of melatonin could effectively ameliorate Cd-induced phytotoxicity…	FRONTIERS IN PLANT SCIENCE	2015	10.3389/fpls.2015.00601	Hasan, Md. Kamrul	Zhou, Jie	8	0	0	0	1	1	0	0	0	0	0	0	0	0	0	0	0	0	0	0	0	0	0	0	1	0	0	0	0	0	0	0	0	0	0	0	0	0	0	0	0	0
Delay in leaf senescence of Malus hupehensis by long-term melatonin application is associated with its regulation of metabolic status and protein degradation	Wang, Ping; Sun, Xun; Chang, Cong; Feng, Fengjuan; Liang, Dong; Cheng, Lailiang; Ma, Fengwang	Melatonin has an important anti-aging role in plant physiology. We tested the effects of long-term melatonin exposure on metabolic status and protein degradation during natural leaf senescence in trees of Malus hupehensis Rehd. The 2-month regular supplement of 100m melatonin to the soil once every 6days altered the metabolic status and delayed protein degradation. For example, leaves from treate…	JOURNAL OF PINEAL RESEARCH	2013	10.1111/jpi.12091	Wang, Ping	Ma, Fengwang	7	0	0	0	0	0	0	0	0	0	0	0	0	0	0	0	0	0	0	0	0	0	0	0	0	1	0	0	0	0	0	1	0	0	1	0	0	0	1	0	0	0
The regulatory effect of melatonin on physiological, biochemical and molecular parameters in cold-stressed wheat seedlings	Turk, Hulya; Erdal, Serkan; Genisel, Mucip; Atici, Okkes; Demir, Yavuz; Yanmis, Derya	We investigated the possible mediatory role of melatonin in protecting wheat plants from cold stress. Ten-day-old wheat seedlings were pretreated with 1 mmol l(-1) melatonin for 12 h and subsequently exposed to stress conditions at 5/2 A degrees C (day/night) for 3 days. Cold stress caused serious reductions in leaf surface area, water content, and photosynthetic pigment content, whereas melatoni…	PLANT GROWTH REGULATION	2014	10.1007/s10725-014-9905-0	Turk, Hulya	Yanmis, Derya	6	1	1	1	0	0	0	0	0	0	0	0	0	0	0	0	0	0	0	0	0	0	0	0	1	1	1	0	1	0	0	0	0	0	0	0	0	0	0	0	0	0
Molecular cloning of rice serotonin N-acetyltransferase, the penultimate gene in plant melatonin biosynthesis	Kang, Kiyoon; Lee, Kyungjin; Park, Sangkyu; Byeon, Yeong; Back, Kyoungwhan	Because of the absence of an arylalkylamine N-acetyltransferase (AANAT) homolog in the plant genome, the proposal was made that a GCN5-related N-acetyltransferase superfamily gene (GNAT) could be substituted for AANAT. To clone rice serotonin N-acetyltransferase (SNAT), we expressed 31 rice GNAT cDNAs in Escherichia coli and screened SNAT activity by measuring N-acetyltryptamine after application…	JOURNAL OF PINEAL RESEARCH	2013	10.1111/jpi.12011	Kang, Kiyoon	Back, Kyoungwhan	5	0	1	1	0	0	0	0	0	0	0	0	0	0	0	0	0	0	0	0	0	0	0	0	0	0	0	0	0	0	0	0	0	0	0	0	0	0	0	0	0	0
Melatonin induces class A1 heat-shock factors (HSFA1s) and their possible involvement of thermotolerance in Arabidopsis	Shi, Haitao; Tan, Dun-Xian; Reiter, Russel J.; Ye, Tiantian; Yang, Fan; Chan, Zhulong	Melatonin (N-acetyl-5-methoxytryptamine) serves as an important signal molecule during plant developmental processes and multiple abiotic stress responses. However, the involvement of melatonin in thermotolerance and the underlying molecular mechanism in Arabidopsis were largely unknown. In this study, we found that the endogenous melatonin level in Arabidopsis leaves was significantly induced by…	JOURNAL OF PINEAL RESEARCH	2015	10.1111/jpi.12219	Shi, Haitao	Chan, Zhulong	6	0	1	1	1	1	1	0	0	0	0	0	0	0	0	0	0	0	0	0	0	0	0	0	0	0	0	0	0	0	0	0	0	0	0	0	0	0	0	0	0	0
Melatonin synthesis in rice seedlings in vivo is enhanced at high temperatures and under dark conditions due to increased serotonin N-acetyltransferase and N-acetylserotonin methyltransferase activities	Byeon, Yeong; Back, Kyoungwhan	Temperature and light are important environmental factors for plant growth and development. The final two enzymes in the melatonin synthesis pathway in plants are serotonin N-acetyltransferase (SNAT) and N-acetylserotonin methyltransferase (ASMT), which have thermophilic characteristics. Thus, the effects of temperature and light on melatonin synthesis in rice seedlings were investigated. Here, w…	JOURNAL OF PINEAL RESEARCH	2014	10.1111/jpi.12111	Byeon, Yeong	Back, Kyoungwhan	2	0	0	0	0	0	0	0	0	0	0	0	0	0	0	0	0	0	0	0	0	0	0	0	0	0	0	0	0	0	0	0	1	0	0	0	0	0	0	0	0	0
Melatonin enhances thermotolerance by promoting cellular protein protection in tomato plants	Xu, Wen; Cai, Shu-Yu; Zhang, Yun; Wang, Yu; Ahammed, Golam Jalal; Xia, Xiao-Jian; Shi, Kai; Zhou, Yan-Hong; Yu, Jing-Quan; Reiter, Russel J.; Zhou, Jie	Melatonin is a pleiotropic signaling molecule that provides physiological protection against diverse environmental stresses in plants. Nonetheless, the mechanisms for melatonin-mediated thermotolerance remain largely unknown. Here, we report that endogenous melatonin levels increased with a rise in ambient temperature and that peaked at 40 degrees C. Foliar pretreatment with an optimal dose of me…	JOURNAL OF PINEAL RESEARCH	2016	10.1111/jpi.12359	Xu, Wen	Zhou, Jie	11	0	0	0	1	1	0	0	0	0	0	0	0	0	0	0	0	0	0	0	0	0	0	0	0	0	0	0	0	0	0	0	0	0	0	0	0	0	0	0	0	0
Melatonin treatment delays postharvest senescence and regulates reactive oxygen species metabolism in peach fruit	Gao, Hui; Zhang, Zheng Ke; Chai, Hong Kang; Cheng, Ni; Yang, Yue; Wang, Dan Na; Yang, Ting; Cao, Wei	Peach fruit deteriorates and senesces quickly during storage at ambient temperature. Research confirms that melatonin (MT) is involved in plant senescence. However, little information is available on the effects of MT on postharvest senescence. In this study, two cultivars of peach fruit 'Shahong' and 'Qinmi' were treated with MT at 0.1 mmol L (1) and then stored at ambient temperature (25-28 deg…	POSTHARVEST BIOLOGY AND TECHNOLOGY	2016	10.1016/j.postharvbio.2016.03.006	Gao, Hui	Cao, Wei	8	0	1	0	0	0	0	0	0	0	0	0	0	0	0	0	0	0	0	0	0	0	0	1	1	1	1	1	1	0	0	1	0	0	0	0	0	0	1	0	0	0
Melatonin promotes seminal root elongation and root growth in transgenic rice after germination	Park, Sangkyu; Back, Kyoungwhan	The effect of melatonin on root growth after germination was examined in transgenic rice seedlings expressing sheep serotonin N-acetyltransferase (NAT). Enhanced melatonin levels were found in T3 homozygous seedlings because of the ectopic overexpression of sheep NAT, which is believed to be the rate-limiting enzyme in melatonin biosynthesis in animals. Compared with wild-type rice seeds, the tra…	JOURNAL OF PINEAL RESEARCH	2012	10.1111/j.1600-079X.2012.01008.x	Park, Sangkyu	Back, Kyoungwhan	2	0	1	1	0	0	1	0	0	0	0	0	0	0	0	0	0	0	0	0	0	0	0	0	0	0	0	0	0	0	0	0	1	0	0	0	0	0	0	0	0	0
Melatonin mediates selenium-induced tolerance to cadmium stress in tomato plants	Li, Meng-Qi; Hasan, Md. Kamrul; Li, Cai-Xia; Ahammed, Golam Jalal; Xia, Xiao-Jian; Shi, Kai; Zhou, Yan-Hong; Reiter, Russel J.; Yu, Jing-Quan; Xu, Ming-Xing; Zhou, Jie	Both selenium (Se) and melatonin reduce cadmium (Cd) uptake and mitigate Cd toxicity in plants. However, the relationship between Se and melatonin in Cd detoxification remains unclear. In this study, we investigated the influence of three forms of Se (selenocysteine, sodium selenite, and sodium selenate) on the biosynthesis of melatonin and the tolerance against Cd in tomato plants. Pretreatment …	JOURNAL OF PINEAL RESEARCH	2016	10.1111/jpi.12346	Li, Meng-Qi	Zhou, Jie	11	0	1	1	0	0	0	0	0	0	0	0	0	0	0	0	0	0	0	0	0	0	0	0	0	0	0	0	0	0	0	0	0	0	0	0	0	0	0	0	0	0
Molecular cloning of a plant N-acetylserotonin methyltransferase and its expression characteristics in rice	Kang, Kiyoon; Kong, Kyoungjin; Park, Sangkyu; Natsagdorj, Uyanga; Kim, Young Soon; Back, Kyoungwhan	N-acetylserotonin methyltransferase (ASMT), the last enzyme in the synthesis of melatonin, catalyzes N-acetylserotonin into melatonin. For the first time, we cloned ASMT from rice through the analysis of recombinant Escherichia coli harboring putative rice O-methyltransferase (OMT) cDNAs. In total, 18 full-length cDNAs, which show homology to wheat caffeic acid 3-O-methyltransferase, were express…	JOURNAL OF PINEAL RESEARCH	2011	10.1111/j.1600-079X.2010.00841.x	Kang, Kiyoon	Back, Kyoungwhan	6	0	1	1	0	0	0	0	0	0	0	0	0	0	0	0	0	0	0	0	0	0	0	0	0	1	0	0	0	0	0	0	0	0	0	0	0	0	1	0	0	0
Melatonin systemically ameliorates drought stress-induced damage in Medicago sativa plants by modulating nitro-oxidative homeostasis and proline metabolism	Antoniou, Chrystalla; Chatzimichail, Giannis; Xenofontos, Rafaella; Pavlou, Jan J.; Panagiotou, Evangelia; Christou, Anastasis; Fotopoulos, Vasileios	Recent reports have uncovered the multifunctional role of melatonin in plant physiological responses under optimal and suboptimal environmental conditions. In this study, we explored whether melatonin pretreatment could provoke priming effects in alfalfa (Medicago sativa L.) plants subsequently exposed to prolonged drought stress (7 days), by withholding watering. Results revealed that the rhizos…	JOURNAL OF PINEAL RESEARCH	2017	10.1111/jpi.12401	Antoniou, Chrystalla	Fotopoulos, Vasileios	7	0	1	1	0	0	0	0	0	0	0	0	0	0	0	0	0	0	0	0	0	0	0	1	1	0	1	0	0	0	0	0	1	0	1	0	0	0	0	0	0	0
Arabidopsis serotonin N-acetyltransferase knockout mutant plants exhibit decreased melatonin and salicylic acid levels resulting in susceptibility to an avirulent pathogen	Lee, Hyoung Yool; Byeon, Yeong; Tan, Dun-Xian; Reiter, Russel J.; Back, Kyoungwhan	Serotonin N-acetyltransferase (SNAT) is the penultimate enzyme in the melatonin biosynthesis pathway in plants. We examined the effects of SNAT gene inactivation in two Arabidopsis T-DNA insertion mutant lines. After inoculation with the avirulent pathogen Pseudomonas syringe pv. tomato DC3000 harboring the elicitor avrRpt2 (Pst-avrRpt2), melatonin levels in the snat knockout mutant lines were 50…	JOURNAL OF PINEAL RESEARCH	2015	10.1111/jpi.12214	Lee, Hyoung Yool	Back, Kyoungwhan	5	0	0	0	1	0	1	0	0	0	0	0	0	0	0	0	0	0	0	0	0	0	0	0	0	0	0	0	0	0	0	0	0	0	0	0	0	0	0	0	0	1
INDOLE-3-ACETIC ACID INDUCIBLE 17 positively modulates natural leaf senescence through melatonin-mediated pathway in Arabidopsis	Shi, Haitao; Reiter, Russel J.; Tan, Dun-Xian; Chan, Zhulong	Melatonin (N-acetyl-5-methoxytryptamine) functions as a ubiquitous modulator in multiple plant developmental processes and various stress responses. However, the involvement of melatonin in natural leaf senescence and the underlying molecular mechanism in Arabidopsis remain unclear. In this study, we found that the endogenous melatonin level was significantly induced in a developmental stage-depe…	JOURNAL OF PINEAL RESEARCH	2015	10.1111/jpi.12188	Shi, Haitao	Chan, Zhulong	4	0	1	1	1	1	1	0	0	0	0	0	0	0	0	0	0	0	0	0	0	0	0	0	0	1	0	0	0	0	0	1	0	0	1	0	0	0	1	0	0	0
Melatonin content in grape: myth or panacea?	Iriti, Marcello; Rossoni, Mara; Faoro, Franco	Melatonin (N-acetyl-5-methoxytryptamine) was detected by a modified HPLC method and ELISA tests in extracts of eight different Vitis vinifera cultivars, namely Nebbiolo, Croatina, Sangiovese, Merlot, Marzemino, Cabernet Franc, Cabernet Sauvignon and Barbera. Its concentration varied greatly among the cultivars, being the highest in Nebbiolo (0.965 ng g(-1)) and Croatina (0.870 ng g(-1)). Field tr…	JOURNAL OF THE SCIENCE OF FOOD AND AGRICULTURE	2006	10.1002/jsfa.2537	Iriti, Marcello	Faoro, Franco	3	1	1	1	0	0	0	0	0	0	0	0	0	0	0	0	0	0	0	0	0	0	0	0	1	0	0	0	0	0	0	0	0	1	0	0	0	1	0	0	0	0
Melatonin as an antioxidant and its semi-lunar rhythm in green macroalga Ulva sp.	Tal, Ofir; Haim, Abraham; Harel, Orna; Gerchman, Yoram	The presence and role of melatonin in plants are still under debate owing to difficulties of identification and quantification. Accordingly, although it has been frequently proposed that melatonin acts as an antioxidant in phototrophic organisms, experimental data on its physiological role are scarce. This study describes the use of a rapid and simple new method for quantification of melatonin in…	JOURNAL OF EXPERIMENTAL BOTANY	2011	10.1093/jxb/erq378	Tal, Ofir	Gerchman, Yoram	4	1	0	0	1	0	0	0	0	0	0	0	0	0	0	0	0	0	0	0	0	0	0	0	1	0	0	0	0	1	0	0	0	0	0	0	0	0	0	0	0	0
Changes in the levels of indoleamine phytochemicals during veraison and ripening of wine grapes	Murch, Susan J.; Hall, Barbara A.; Le, Cuong H.; Saxena, Praveen K.	Melatonin and serotonin have previously been described in mature wine grapes and finished wines, but the metabolism of these signalling molecules in the development of wine grapes has not previously been investigated. We harvested wine grapes at different stages of development from lag phase through veraison from eight different commercial vineyards representing a diversity of growing conditions,…	JOURNAL OF PINEAL RESEARCH	2010	10.1111/j.1600-079X.2010.00774.x	Murch, Susan J.	Saxena, Praveen K.	4	1	1	1	0	0	0	0	0	0	0	0	0	0	0	0	0	0	0	0	0	0	0	1	0	0	0	0	0	0	0	0	0	0	0	0	0	0	0	0	0	0
Exogenous Melatonin Confers Salt Stress Tolerance to Watermelon by Improving Photosynthesis and Redox Homeostasis	Li, Hao; Chang, Jingjing; Chen, Hejie; Wang, Zhongyuan; Gu, Xiurong; Wei, Chunhua; Zhang, Yong; Ma, Jianxiang; Yang, Jianqiang; Zhang, Xian	Melatonin, a pleiotropic signal molecule, has been shown to play important roles in the regulation of plant growth, development, and responses to environmental stresses. Since a few species have been investigated to unveil the effect of exogenous melatonin on salt stress, the underlying mechanism of melatonin-mediated salt stress tolerance in other plant species still remains largely unknown. In …	FRONTIERS IN PLANT SCIENCE	2017	10.3389/fpls.2017.00295	Li, Hao	Zhang, Xian	10	0	1	1	1	0	0	0	0	0	0	0	0	0	0	0	0	0	0	0	0	0	0	0	1	1	0	0	0	0	0	0	1	0	0	0	0	0	0	0	0	0
Tolerance to Stress Combination in Tomato Plants: New Insights in the Protective Role of Melatonin	Martinez, Vicente; Nieves-Cordones, Manuel; Lopez-Delacalle, Maria; Rodenas, Reyes; Mestre, Teresa C.; Garcia-Sanchez, Francisco; Rubio, Francisco; Nortes, Pedro A.; Mittler, Ron; Rivero, Rosa M.	Abiotic stresses such as drought, heat or salinity are major causes of yield loss worldwide. Recent studies have revealed that the acclimation of plants to a combination of different environmental stresses is unique and therefore cannot be directly deduced from studying the response of plants to each of the different stresses applied individually. The efficient detoxification of reactive oxygen s…	MOLECULES	2018	10.3390/molecules23030535	Martinez, Vicente	Rivero, Rosa M.	10	0	1	1	1	0	0	0	0	0	0	0	0	0	0	0	0	0	0	0	0	0	0	0	1	1	0	0	0	0	0	0	1	0	0	0	0	0	0	0	0	0
Melatonin improves the survival of cryopreserved callus of Rhodiola crenulata	Zhao, Yan; Qi, Li-Wang; Wang, Wei-Ming; Saxena, Praveen K.; Liu, Chun-Zhao	An important aspect of the function of melatonin seems to be the mediation of stress caused by environmental and chemical factors. In the cryopreservation process, environmental changes including osmotic injury, desiccation, and low temperature can impose a series of stresses on plants. In this study, we evaluated the role of melatonin in stress protection during the process of cryopreservation u…	JOURNAL OF PINEAL RESEARCH	2011	10.1111/j.1600-079X.2010.00817.x	Zhao, Yan	Liu, Chun-Zhao	5	1	1	1	0	0	0	0	0	0	0	0	0	0	0	0	0	0	0	0	0	0	0	0	1	0	0	1	0	0	0	0	0	0	0	0	0	0	0	0	0	0
Melatonin and serotonin in flowers and fruits of Datura metel L.	Murch, Susan J.; Alan, Ali R.; Cao, Jin; Saxena, Praveen K.	Datura metel is a plant that contains several different neurologically active phytochemicals which affect human health. On-going research has examined the potential role of the human neuroindoles, melatonin and serotonin, in medicinal plants with neurological efficacy. In this report, we describe the quantification of melatonin and serotonin in flowers and developing fruits of Datura metel and th…	JOURNAL OF PINEAL RESEARCH	2009	10.1111/j.1600-079X.2009.00711.x	Murch, Susan J.	Saxena, Praveen K.	4	1	0	1	0	0	0	0	0	0	0	0	0	0	0	0	0	0	0	0	0	0	0	0	0	0	0	0	0	0	0	0	0	0	0	0	0	0	0	0	0	0
Quantification of melatonin in phototrophic organisms	Pape, Carsten; Luening, Klaus	Melatonin, the chief secretory product of the vertebrate pineal gland is also known to occur in numerous photoautotrophic organisms. The indoleamine is suspected to act as a transducer of photoperiodic information and/or to participate in antioxidative protection. In higher plants and other photoautotrophic organisms, contradictory results for melatonin content for samples from the same species s…	JOURNAL OF PINEAL RESEARCH	2006	10.1111/j.1600-079X.2006.00348.x	Pape, Carsten	Luening, Klaus	2	1	1	1	0	0	0	0	0	0	0	0	0	0	0	0	0	0	0	0	0	0	0	0	0	0	1	0	0	0	0	0	0	0	0	0	0	0	0	0	0	0
Melatonin levels, determined by LC-ESI-MS/MS, fluctuate during the day/night cycle in Vitis vinifera cv Malbec: evidence of its antioxidant role in fruits	Boccalandro, Hernan E.; Gonzalez, Carina V.; Wunderlin, Daniel A.; Silva, Maria F.	The identification of melatonin in plants has inspired new investigations to understand its biological function and which endogenous and external factors control its levels in these organisms. Owing to the therapeutical and nutraceutical properties of melatonin, it should be important to develop reliable analytical methods for its quantification in vegetal matrices containing this indoleamine, su…	JOURNAL OF PINEAL RESEARCH	2011	10.1111/j.1600-079X.2011.00884.x	Boccalandro, Hernan E.	Silva, Maria F.	4	0	1	1	0	1	0	0	0	0	0	0	0	0	0	0	0	0	0	0	0	0	0	0	1	1	0	1	0	0	1	0	1	0	0	0	0	1	0	0	0	0
Grape phytochemicals: A bouquet of old and new nutraceuticals for human health	Iriti, Marcello; Faoro, Franco	Health benefits associated with Mediterranean diets are due to the significantly large intake of functional plant foods and beverages, i.e., fruits, vegetables, cereals, legumes, nuts, wine, beer, and olive oil, containing a great array of bioactive phytochemicals or nutraceutical compounds. Therefore, the low risk of chronic diseases, such as coronary hearth disease and certain cancers, observed…	MEDICAL HYPOTHESES	2006	10.1016/j.mehy.2006.03.049	Iriti, Marcello	Faoro, Franco	2	1	1	1	0	0	0	0	0	0	0	0	0	0	0	0	0	0	0	0	0	0	0	0	0	0	0	0	0	0	0	0	0	0	0	0	0	1	0	0	0	0
HsfA1a upregulates melatonin biosynthesis to confer cadmium tolerance in tomato plants	Cai, Shu-Yu; Zhang, Yun; Xu, You-Ping; Qi, Zhen-Yu; Li, Meng-Qi; Ahammed, Golam Jalal; Xia, Xiao-Jian; Shi, Kai; Zhou, Yan-Hong; Reiter, Russel J.; Yu, Jing-Quan; Zhou, Jie	Melatonin regulates broad aspects of plant responses to various biotic and abiotic stresses, but the upstream regulation of melatonin biosynthesis by these stresses remains largely unknown. Herein, we demonstrate that transcription factor heat-shock factor A1a (HsfA1a) conferred cadmium (Cd) tolerance to tomato plants, in part through its positive role in inducing melatonin biosynthesis under Cd …	JOURNAL OF PINEAL RESEARCH	2017	10.1111/jpi.12387	Cai, Shu-Yu	Zhou, Jie	12	0	0	0	0	0	0	0	0	0	0	0	0	0	0	0	0	0	0	0	0	0	0	0	0	0	0	0	0	0	0	0	0	0	1	0	0	0	0	0	0	0
The melatonin metabolite N-1-acetyl-5-methoxykynuramine is a potent singlet oxygen scavenger	Schaefer, Meike; Hardeland, Rudiger	Singlet oxygen was generated by means of rose bengal under irradiation by visible light. N-1-acetyl-5-methoxykynuramine (AMK) was rapidly destroyed by this reactive oxygen species, whereas its formylated precursor, N-1-acetyl-N-2-formyl-5-methoxykynuramine (AFMK), was remarkably inert. At photon fluence rates of 1400 mu mol photons/m(2)s, and using 20 mu m rose bengal, most of initially 0.2 mm AM…	JOURNAL OF PINEAL RESEARCH	2009	10.1111/j.1600-079X.2008.00614.x	Schaefer, Meike	Hardeland, Rudiger	2	0	0	0	0	0	0	0	0	0	0	0	0	0	0	1	1	0	0	0	0	0	0	0	0	1	0	0	0	0	0	0	1	1	0	0	0	0	0	0	0	0
Exogenous melatonin improves growth and photosynthetic capacity of cucumber under salinity-induced stress	Wang, L. Y.; Liu, J. L.; Wang, W. X.; Sun, Y.	Melatonin mediates many physiological processes in animals and plants. To examine the potential roles of melatonin in salinity tolerance, we investigated the effects of exogenous melatonin on growth and antioxidant system in cucumber under 200 mM NaCl stress conditions. The results showed that the melatonin-treated plants significantly increased growth mass and antioxidant protection. Under salin…	PHOTOSYNTHETICA	2016	10.1007/s11099-015-0140-3	Wang, L. Y.	Sun, Y.	4	0	0	0	1	0	0	0	0	0	0	0	0	0	0	0	0	0	0	0	0	0	0	0	1	0	1	0	1	0	0	0	0	0	1	0	0	0	0	0	0	0
Detection and quantification of melatonin and serotonin in eight Sweet Cherry cultivars (Prunus avium L.)	Gonzalez-Gomez, D.; Lozano, M.; Fernandez-Leon, M. F.; Ayuso, M. C.; Bernalte, M. J.; Rodriguez, A. B.	Melatonin functions as a free radical scavenger and controls the regulation of the sleep-wake cycle in mammals, while serotonin is the main intermediate in melatonin biosynthesis. In this paper, melatonin and serotonin have been detected and quantified for the first time in eight different sweet cherry cultivars using high performance liquid chromatography with mass spectrometry detection. The li…	EUROPEAN FOOD RESEARCH AND TECHNOLOGY	2009	10.1007/s00217-009-1042-z	Gonzalez-Gomez, D.	Rodriguez, A. B.	6	0	1	1	0	0	0	0	0	0	0	0	0	0	0	0	0	0	0	0	0	0	0	0	0	0	0	0	0	0	0	0	0	0	0	0	0	0	0	0	0	0
Characterization of tryptamine 5-hydroxylase and serotonin synthesis in rice plants	Kang, S.; Kang, K.; Lee, K.; Back, K.	Serotonin is a well-known pineal hormone that in mammals plays a key role in mood. In plants, serotonin is implicated in several physiological roles such as flowering, morphogenesis, and adaptation to environmental changes. However, its biosynthetic enzyme in plants has not been characterized. Therefore, we measured the serotonin content and enzyme activity responsible for serotonin biosynthesis …	PLANT CELL REPORTS	2007	10.1007/s00299-007-0405-9	Kang, S.	Back, K.	4	0	0	0	0	0	0	0	0	0	0	0	0	0	0	0	0	0	0	0	0	0	0	0	0	0	0	0	0	0	0	0	0	0	0	0	0	0	0	0	0	0
Comparative physiological and proteomic analyses reveal the actions of melatonin in the reduction of oxidative stress in Bermuda grass (Cynodon dactylon (L). Pers.)	Shi, Haitao; Wang, Xin; Tan, Dun-Xian; Reiter, Russel J.; Chan, Zhulong	The fact of melatonin as an important antioxidant in animals led plant researchers to speculate that melatonin also acts in the similar manner in plants. Although melatonin has significant effects on alleviating stress-triggered reactive oxygen species (ROS), the involvement of melatonin in direct oxidative stress and the underlying physiological and molecular mechanisms remain unclear in plants.…	JOURNAL OF PINEAL RESEARCH	2015	10.1111/jpi.12246	Shi, Haitao	Chan, Zhulong	5	0	1	1	1	0	0	0	0	0	0	0	0	0	0	0	0	0	0	0	0	0	0	1	1	1	1	0	0	0	0	0	0	0	0	0	0	0	0	0	0	0
Growth conditions determine different melatonin levels in Lupinus albus L.	Arnao, Marino B.; Hernandez-Ruiz, Josefa	Melatonin, an indoleamine, which has recently been assigned several roles in plant physiology as a growth promoter, as rooting agent, and as antioxidant in senescence delay and cytoprotection, seems to have a relevant function in plant stress situations. The presence of melatonin increases the resistance of lupin plant tissues (Lupinus albus L.) against natural or artificially induced adverse sit…	JOURNAL OF PINEAL RESEARCH	2013	10.1111/jpi.12055	Arnao, Marino B.	Hernandez-Ruiz, Josefa	2	0	1	1	0	1	0	0	0	0	0	0	0	0	0	0	0	0	0	0	0	0	0	0	1	0	1	0	0	0	0	0	0	0	0	0	0	0	1	1	0	0
Exogenously applied melatonin (N-acetyl-5-methoxytryptamine) affects flowering of the short-day plant Chenopodium rubrum	Kolar, J; Johnson, CH; Machackova, I	Melatonin (N -acetyl-5-methoxytryptamine) is an animal hormone synthesized predominantly at night. It often serves as a signal of darkness that regulates circadian rhythmicity and photoperiodism. Melatonin has also been found in algae and higher plants, including the short-day flowering plant Chenopodium rubrum . To test its involvement in plant photoperiodism, melatonin solutions were applied to…	PHYSIOLOGIA PLANTARUM	2003	10.1034/j.1399-3054.2003.00114.x	Kolar, J	Machackova, I	3	1	1	1	1	0	0	0	0	0	0	0	0	0	0	0	0	0	0	0	1	0	0	0	0	0	0	0	0	1	0	0	1	0	0	0	0	0	0	0	0	0
Redox intermediates of plant and mammalian peroxidases: A comparative transient-kinetic study of their reactivity toward indole derivatives	Jantschko, W; Furtmuller, PG; Allegra, M; Livrea, MA; Jakopitsch, C; Regelsberger, G; Obinger, C	A comparative study on the reactivity of five indole derivatives (tryptamine, N-acetyltryptamine, tryptophan, melatonin, and serotonin), with the redox intermediates compound I (k(2)) and compound II (k(3)) of the plant enzyme horseradish peroxidase (HRP) and the two mammalian enzymes lactoperoxidase (LPO) and myelo-peroxidase (MPO), was performed using the sequential-mixing stopped-flow techniqu…	ARCHIVES OF BIOCHEMISTRY AND BIOPHYSICS	2002	10.1006/abbi.2001.2674	Jantschko, W	Obinger, C	7	0	0	0	0	0	0	0	0	0	0	0	0	0	0	0	0	0	0	0	0	0	0	0	0	0	0	0	0	0	0	0	0	0	0	0	0	0	0	0	0	0
Changes in melatonin levels in transgenic 'Micro-Tom' tomato overexpressing ovine AANAT and ovine HIOMT genes	Wang, Lin; Zhao, Yu; Reiter, Russel J.; He, Changjiu; Liu, Guoshi; Lei, Qiong; Zuo, Bixiao; Zheng, Xiao Dong; Li, Qingtian; Kong, Jin	In animals, the melatonin biosynthesis pathway has been well defined after the isolation and identification of the four key genes that are involved in the conversion of tryptophan to melatonin. In plants, there are special alternative catalyzing steps, and plant genes share very low homology with the animal genes. It was of interest to examine the phenotype of transgenic Micro-Tom tomato plants o…	JOURNAL OF PINEAL RESEARCH	2014	10.1111/jpi.12105	Wang, Lin	Kong, Jin	10	0	1	1	0	0	1	0	0	0	0	0	0	0	0	0	0	0	0	0	0	0	0	0	0	0	0	0	0	0	0	0	0	0	0	0	0	0	0	0	0	0
Reversal of the inhibitory effect of light and high temperature on germination of Phacelia tanacetifolia seeds by melatonin	Tiryaki, Iskender; Keles, Huseyin	Possible role of melatonin in the germination of negatively photoblastic and thermosensitive seeds of Phacelia tanacetifolia Benth was studied. Final germination percentage (FGP) was determined in the presence or absence of light at various temperatures, ranging from 0 to 40 degrees C. The highest FGP was determined as 48.7% and 92% at temperature of 15 degrees C in the presence and absence of li…	JOURNAL OF PINEAL RESEARCH	2012	10.1111/j.1600-079X.2011.00947.x	Tiryaki, Iskender	Keles, Huseyin	2	0	1	1	0	0	0	0	0	0	0	0	0	0	0	0	0	0	0	0	0	0	0	0	0	0	0	0	0	0	0	0	1	0	0	0	0	0	0	0	0	0
Determination of melatonin in wine and plant extracts by capillary electrochromatography with immobilized carboxylic multi-walled carbon nanotubes as stationary phase	Stage, Patricia W.; Sombra, Lorena L.; Messina, German; Martinez, Luis D.; Silya, Maria F.	The finding of melatonin, the often called hormone of darkness in plants opens an interesting perspective associated to the plethora of health benefits related to the moderate consumption of red wine. In this study, the implementation of a new method for the determination of melatonin in complex food matrices by CEC with immobilized carboxylic multi-walled carbon nanotubes as stationary phase is …	ELECTROPHORESIS	2010	10.1002/elps.200900782	Stage, Patricia W.	Silya, Maria F.	5	1	1	1	0	0	0	0	0	0	0	0	0	0	0	0	0	0	0	0	0	0	0	0	0	0	0	0	0	0	0	0	0	0	0	0	0	0	0	0	0	0
Profiling of melatonin in the model tomato (Solanum lycopersicum L.) cultivar Micro-Tom	Okazaki, Masateru; Ezura, Hiroshi	Melatonin exists in a considerable variety of plant species. However, the physiological roles of melatonin in plants are not well understood. In this study, the distribution and accumulation of melatonin during leaf and fruit development were analyzed in Micro-Tom, a model cultivar of tomato (Solanum lycopersicum L.). Melatonin was extracted using an acetone-methanol method and measured by enzyme…	JOURNAL OF PINEAL RESEARCH	2009	10.1111/j.1600-079X.2009.00668.x	Okazaki, Masateru	Ezura, Hiroshi	2	0	1	1	0	0	0	0	0	0	0	0	0	0	0	0	0	0	0	0	0	0	0	0	0	0	0	0	0	0	0	0	0	0	0	0	0	0	0	0	0	0
Salt stress-induced seedling growth inhibition coincides with differential distribution of serotonin and melatonin in sunflower seedling roots and cotyledons	Mukherjee, Soumya; David, Anisha; Yadav, Sunita; Baluska, Frantisek; Bhatla, Satish Chander	Indoleamines regulate a variety of physiological functions during the growth, morphogenesis and stress-induced responses in plants. Present investigations report the effect of NaCl stress on endogenous serotonin and melatonin accumulation and their differential spatial distribution in sunflower (Helianthus annuus) seedling roots and cotyledons using HPLC and immunohistochemical techniques, respec…	PHYSIOLOGIA PLANTARUM	2014	10.1111/ppl.12218	Mukherjee, Soumya	Bhatla, Satish Chander	5	0	1	0	1	1	0	0	0	0	0	0	0	0	0	0	0	0	0	0	0	0	0	0	0	0	0	0	0	0	0	0	0	0	0	0	0	0	0	0	0	0
An increase in melatonin in transgenic rice causes pleiotropic phenotypes, including enhanced seedling growth, delayed flowering, and low grain yield	Byeon, Yeong; Back, Kyoungwhan	No previous reports have described the effects of an increase in endogenous melatonin levels on plant yield and reproduction. Here, the phenotypes of melatonin-rich transgenic rice plants overexpressing sheep serotonin N-acetyltransferase were investigated under field conditions. Early seedling growth of melatonin-rich transgenic rice was greatly accelerated, with enhanced biomass relative to the…	JOURNAL OF PINEAL RESEARCH	2014	10.1111/jpi.12129	Byeon, Yeong	Back, Kyoungwhan	2	0	1	1	0	1	1	0	0	0	0	0	0	0	0	0	0	0	0	0	0	0	0	0	0	0	0	0	0	0	0	0	0	0	0	0	0	0	0	0	0	0
Melatonin: A new bioactive compound in wine	Isabel Rodriguez-Naranjo, M.; Gil-Izquierdo, Angel; Troncoso, Ana M.; Cantos, Emma; Carmen Garcia-Parrilla, M.	Melatonin (N-acetyl-3-(2-aminoethyl)-5-methoxyindole) is biologically active as a neurohormone and a chronobiotic and antioxidant agent. Its concentration in plant material and foods is usually determined by ELISA. However, commercial ELISA kits are not validated for those matrixes. This paper aims to accurately detect melatonin in wines. The advantages and pitfalls of the methods currently used …	JOURNAL OF FOOD COMPOSITION AND ANALYSIS	2011	10.1016/j.jfca.2010.12.009	Isabel Rodriguez-Naranjo, M.	Carmen Garcia-Parrilla, M.	5	0	1	0	0	0	0	0	0	0	0	0	0	0	0	0	0	0	0	0	0	0	0	0	1	0	0	0	0	0	0	0	0	1	0	0	0	0	0	0	0	0
Melatonin, melatonin isomers and stilbenes in Italian traditional grape products and their antiradical capacity	Vitalini, Sara; Gardana, Claudio; Simonetti, Paolo; Fico, Gelsomina; Iriti, Marcello	Although polyphenols represent the paradigm of the health-promoting effects ascribed to grape products, recently, attention has been paid to dietary melatonin, significantly present in Mediterranean foods. In this work, we measured melatonin, its isomers, stilbenes (trans- and cis-resveratrol and their glucosides, piceids) and total polyphenols in some different grape products (red, white and des…	JOURNAL OF PINEAL RESEARCH	2013	10.1111/jpi.12028	Vitalini, Sara	Iriti, Marcello	5	1	1	1	0	0	0	0	0	0	0	0	0	0	0	0	0	0	0	0	0	0	0	0	0	1	0	0	0	0	0	0	0	0	0	0	0	0	0	0	0	0
Plant mitochondria synthesize melatonin and enhance the tolerance of plants to drought stress	Wang, Lin; Feng, Chao; Zheng, Xiaodong; Guo, Yan; Zhou, Fangfang; Shan, Dongqian; Liu, Xuan; Kong, Jin	Synthesis of melatonin in mitochondria was reported in animals. However, there is no report on whether plant mitochondria also produce melatonin. Herein, we show that plant mitochondria are a major site for melatonin synthesis. In an in vitro study, isolated apple mitochondria had the capacity to generate melatonin. Subcellular localization analysis documented that an apple SNAT isoform, MzSNAT5,…	JOURNAL OF PINEAL RESEARCH	2017	10.1111/jpi.12429	Wang, Lin	Kong, Jin	8	0	1	1	0	0	1	0	0	0	0	0	0	0	0	0	0	0	0	0	0	0	0	0	0	1	0	0	0	0	0	0	0	0	0	0	0	0	0	0	0	0
Determination of the melatonin content of different varieties of tomatoes (Lycopersicon esculentum) and strawberries (Fragaria ananassa)	Stuertz, Melanie; Cerezo, Ana B.; Cantos-Villar, E.; Garcia-Parrilla, M. C.	Melatonin has recently been detected in various plants and foods. However, data regarding the food composition of melatonin are too scarce to evaluate dietary intake. This paper aims to identify melatonin unequivocally using LC-MS in a wide set of varieties of tomatoes (Lycopersicon esculentum) and strawberry (Fragaria ananassa). Furthermore, a validated LC fluorescence was developed. This is the…	FOOD CHEMISTRY	2011	10.1016/j.foodchem.2011.01.093	Stuertz, Melanie	Garcia-Parrilla, M. C.	4	1	1	1	0	0	0	0	0	0	0	0	0	0	0	0	0	0	0	0	0	0	0	0	0	1	0	0	0	0	0	0	0	0	0	0	0	0	0	0	0	0
Cellular localization and kinetics of the rice melatonin biosynthetic enzymes SNAT and ASMT	Byeon, Yeong; Lee, Hyoung Yool; Lee, Kyungjin; Park, Sangkyu; Back, Kyoungwhan	Serotonin N-acetyltransferase (SNAT) and N-acetylserotonin methyltransferase (ASMT) are the final two enzymes in the melatonin synthesis pathway in plants. Although their corresponding genes have been cloned, their cellular localization and enzymatic characteristics are unknown. Using confocal microscopy, we showed that SNAT protein is localized in chloroplasts, whereas ASMT is expressed in the c…	JOURNAL OF PINEAL RESEARCH	2014	10.1111/jpi.12103	Byeon, Yeong	Back, Kyoungwhan	5	0	0	0	0	0	0	0	0	0	0	0	0	0	0	0	0	0	0	0	0	0	0	0	0	1	0	0	0	0	0	0	0	0	1	0	0	0	0	0	0	0
Tryptamine 5-hydroxylase-deficient Sekiguchi rice induces synthesis of 5-hydroxytryptophan and N-acetyltryptamine but decreases melatonin biosynthesis during senescence process of detached leaves	Park, Sangkyu; Lee, Kyungjin; Kim, Young-Soon; Back, Kyoungwhan	Melatonin biosynthesis was examined in Sekiguchi mutant rice lacking functional tryptamine 5-hydroxylase (T5H) activity, which is the terminal enzyme for serotonin biosynthesis in rice. During senescence process, the leaves of Sekiguchi mutant rice produced more tryptamine and N-acetyltryptamine compared with the wild-type Asahi leaves. Even though T5H activity is absent, Sekiguchi leaves produce…	JOURNAL OF PINEAL RESEARCH	2012	10.1111/j.1600-079X.2011.00930.x	Park, Sangkyu	Back, Kyoungwhan	4	0	1	1	1	0	0	0	0	0	0	0	0	0	0	0	0	0	0	0	0	0	0	0	0	0	0	0	0	0	0	1	0	0	0	0	0	0	1	0	0	0
Melatonin induces the transcripts of CBF/DREB1s and their involvement in both abiotic and biotic stresses in Arabidopsis	Shi, Haitao; Qian, Yongqiang; Tan, Dun-Xian; Reiter, Russel J.; He, Chaozu	Melatonin (N-acetyl-5-methoxytryptamine) is a naturally occurring small molecule that acts as an important secondary messenger in plant stress responses. However, the mechanism underlying the melatonin-mediated signaling pathway in plant stress responses has not been established. C-repeat-binding factors (CBFs)/Drought response element Binding 1 factors (DREB1s) encode transcription factors that …	JOURNAL OF PINEAL RESEARCH	2015	10.1111/jpi.12262	Shi, Haitao	He, Chaozu	5	0	1	1	1	1	0	0	0	0	0	0	0	0	0	0	0	0	0	0	0	0	0	0	0	1	0	0	0	0	0	0	0	0	0	0	0	0	0	0	0	0
Coordinated regulation of melatonin synthesis and degradation genes in rice leaves in response to cadmium treatment	Byeon, Yeong; Lee, Hyoung Yool; Hwang, Ok Jin; Lee, Hye-Jung; Lee, Kyungjin; Back, Kyoungwhan	We investigated the expression patterns of genes involved in melatonin synthesis and degradation in rice leaves upon cadmium (Cd) treatment and the subcellular localization sites of melatonin 2-hydroxylase (M2H) proteins. The Cd-induced synthesis of melatonin coincided with the increased expression of melatonin biosynthetic genes including tryptophan decarboxylase (TDC), tryptamine 5-hydroxylase …	JOURNAL OF PINEAL RESEARCH	2015	10.1111/jpi.12232	Byeon, Yeong	Back, Kyoungwhan	6	0	0	0	0	0	0	1	0	1	0	0	0	0	0	0	0	0	0	0	0	0	0	0	0	0	0	0	0	0	0	0	0	0	0	0	0	0	0	0	0	0
Melatonin enhances root regeneration, photosynthetic pigments, biomass, total carbohydrates and proline content in the cherry rootstock PHL-C (Prunus avium x Prunus cerasus)	Sarropoulou, Virginia; Dimassi-Theriou, Kortessa; Therios, Ioannis; Koukourikou-Petridou, Magdalene	The present study, investigates the effects of melatonin (0, 0.05, 0.1, 0.5,1, 5 and 10 mu M) on the morphogenic and biochemical responses in the cherry rootstock PHL-C (Prunus avium L x Prunus cerasus L.), from shoot tip explants. The incorporation of melatonin (0-10 mu M) in the Murashige and Skoog (MS) medium, greatly influenced rooting either positively or negatively. Melatonin, irrespective …	PLANT PHYSIOLOGY AND BIOCHEMISTRY	2012	10.1016/j.plaphy.2012.10.001	Sarropoulou, Virginia	Koukourikou-Petridou, Magdalene	4	0	1	0	0	0	0	0	0	0	0	0	0	0	0	0	0	0	0	0	0	0	0	0	0	0	0	0	0	0	0	0	0	0	1	0	0	0	0	0	0	0
Light-regulated melatonin biosynthesis in rice during the senescence process in detached leaves	Byeon, Yeong; Park, Sangkyu; Kim, Young-Soon; Park, Don-Hee; Lee, Sungbeom; Back, Kyoungwhan	The effect of light on melatonin biosynthesis was examined in detached rice (Oryza sativa cv. Asahi) leaves during the senescence process. The detached leaves were exposed to senescence treatment either in constant darkness or in constant light, and subjected to HPLC analysis for melatonin and its precursors. Higher melatonin levels were detected in rice leaves under constant light while very low…	JOURNAL OF PINEAL RESEARCH	2012	10.1111/j.1600-079X.2012.00976.x	Byeon, Yeong	Back, Kyoungwhan	6	0	1	1	0	0	0	0	0	0	0	0	0	0	0	0	0	0	0	0	0	0	0	0	0	0	0	0	0	0	0	1	1	0	0	0	0	0	1	0	0	0
Rapid method for accurate analysis of melatonin, serotonin and auxin in plant samples using liquid chromatography-tandem mass spectrometry	Cao, Jin; Murch, Susan J.; O'Brien, Robert; Saxena, Praveen K.	Currently, the information available on the physiological functions of melatonin in higher plants is rather limited and the role of plant melatonin in human health remains undetermined. Research in this area has been slow due to lack of efficient analytical methods for rapid identification and quantification of the melatonin and related compounds in complex plant matrices. In this communication, …	JOURNAL OF CHROMATOGRAPHY A	2006	10.1016/j.chroma.2006.09.079	Cao, Jin	Saxena, Praveen K.	4	1	1	1	0	0	0	0	0	0	0	0	0	0	0	0	0	0	0	0	0	0	0	0	0	1	0	0	0	0	0	0	0	0	0	0	0	0	0	0	0	0
Melatonin suppression of heat-induced leaf senescence involves changes in abscisic acid and cytokinin biosynthesis and signaling pathways in perennial ryegrass (Lolium perenne L.)	Zhang, Jing; Shi, Yi; Zhang, Xunzhong; Du, Hongmei; Xu, Bin; Huang, Bingru	Leaf senescence is a typical symptom of heat damage in cool-season plant species. The objective of this study was to determine whether melatonin could suppress heat-induced leaf senescence in perennial ryegrass (Lolium perenne L.) and whether melatonin interacted with abscisic acid (ABA) and cytokinin (CK) to exert its biological function. Perennial ryegrass (cv. 'Pinnacle') plants were foliar sp…	ENVIRONMENTAL AND EXPERIMENTAL BOTANY	2017	10.1016/j.envexpbot.2017.02.012	Zhang, Jing	Huang, Bingru	6	0	1	1	1	1	0	0	0	0	0	0	0	0	0	0	0	0	0	0	0	0	0	0	0	0	0	0	0	0	0	1	0	0	1	0	0	0	1	1	0	0
Caffeic acid O-methyltransferase is involved in the synthesis of melatonin by methylating N-acetylserotonin in Arabidopsis	Byeon, Yeong; Lee, Hyoung Yool; Lee, Kyungjin; Back, Kyoungwhan	Although a plant N-acetylserotonin methyltransferase (ASMT) was recently cloned from rice, homologous genes appear to be absent in dicotyledonous plants. To clone an ASMT de novo from a dicotyledonous plant, we expressed eight Arabidopsis thaliana O-methyltransferase (OMT) cDNAs in Escherichia coli and screened for ASMT activity by measuring melatonin production after the application of 1 mM N-ac…	JOURNAL OF PINEAL RESEARCH	2014	10.1111/jpi.12160	Byeon, Yeong	Back, Kyoungwhan	4	0	0	0	0	0	1	0	0	0	0	0	0	0	0	0	0	0	0	0	0	0	0	0	0	0	0	0	0	0	0	0	0	0	0	0	0	0	0	0	0	0
Phytomelatonin receptor PMTR1-mediated signaling regulates stomatal closure in Arabidopsis thaliana	Wei, Jian; Li, Dong-Xu; Zhang, Jia-Rong; Shan, Chi; Rengel, Zed; Song, Zhong-Bang; Chen, Qi	Melatonin has been detected in plants in 1995; however, the function and signaling pathway of this putative phytohormone are largely undetermined due to a lack of knowledge about its receptor. Here, we discovered the first phytomelatonin receptor (CAND2/PMTR1) in Arabidopsis thaliana and found that melatonin governs the receptor-dependent stomatal closure. The application of melatonin induced sto…	JOURNAL OF PINEAL RESEARCH	2018	10.1111/jpi.12500	Wei, Jian	Chen, Qi	7	0	1	1	0	0	0	0	0	0	0	0	0	0	0	0	0	0	0	0	0	0	0	0	0	0	1	0	0	0	0	0	0	0	0	0	0	0	0	0	0	0
Chloroplastic biosynthesis of melatonin and its involvement in protection of plants from salt stress	Zheng, Xiaodong; Tan, Dun X.; Allan, Andrew C.; Zuo, Bixiao; Zhao, Yu; Reiter, Russel J.; Wang, Lin; Wang, Zhi; Guo, Yan; Zhou, Jingzhe; Shan, Dongqian; Li, Qingtian; Han, Zhenhai; Kong, Jin	Within the chloroplasts reactive oxygen species (ROS) are generated during photosynthesis and stressful conditions. Excessive ROS damages chloroplasts and reduces photosynthesis if not properly detoxified. In this current study, we document that chloroplasts produce melatonin, a recently-discovered plant antioxidant molecule. When N-acetylserotonin, a substrate for melatonin synthesis, was fed to…	SCIENTIFIC REPORTS	2017	10.1038/srep41236	Zheng, Xiaodong	Kong, Jin	14	0	1	1	0	0	0	0	0	0	0	0	0	0	0	0	0	0	0	0	0	0	0	0	1	1	0	0	0	0	0	0	1	0	0	0	0	0	0	0	0	0
Exogenous melatonin improves seedling health index and drought tolerance in tomato	Liu, Jianlong; Wang, Weixiang; Wang, Liying; Sun, Yan	The melatonin molecule is well-known for its benefits to human health. It also mediates many physiological processes in plants. In the current study, the effects of melatonin on the health index and drought tolerance of tomato seedlings have been investigated. Under drought stress, chlorophyll contents and net rates of photosynthesis in tomato seedlings were significantly decreased. As the stress…	PLANT GROWTH REGULATION	2015	10.1007/s10725-015-0066-6	Liu, Jianlong	Sun, Yan	4	0	0	0	1	0	0	0	0	0	0	0	0	0	0	0	0	0	0	0	0	0	0	0	1	0	0	0	0	0	0	0	0	0	1	0	0	0	0	0	0	0
Melatonin and serotonin profiles in beans of Coffea species	Ramakrishna, Akula; Giridhar, Parvatam; Sankar, Kadimi Udaya; Ravishankar, Gokare Aswathanarayana	A high-performance liquid chromatography (HPLC) and an electrospray ionization mass spectrometry (LC/ESI-MS) methods were applied to quantify the profiles of melatonin and serotonin (5-HT) in green and roasted beans of Coffea canephora (robusta) and Coffea arabica (arabica). Both melatonin and 5-HT were detected in green coffee beans (5.8 +/- 0.8 mu g/g dry weight (DW), 10.5 +/- 0.6 mu g/g DW) an…	JOURNAL OF PINEAL RESEARCH	2012	10.1111/j.1600-079X.2011.00964.x	Ramakrishna, Akula	Ravishankar, Gokare Aswathanarayana	4	0	1	1	0	0	0	0	0	0	0	0	0	0	0	0	0	0	0	0	0	0	0	0	0	1	0	0	0	0	0	0	0	0	0	0	0	0	0	0	0	0
Lowering intercellular melatonin levels by transgenic analysis of indoleamine 2,3-dioxygenase from rice in tomato plants	Okazaki, Masateru; Higuchi, Kenji; Aouini, Asma; Ezura, Hiroshi	Melatonin exists in numerous living organisms including vertebrates, insects, fungi, bacteria, and plants. Extensive studies have been conducted on the physiological roles of melatonin in various plant species. In plants, melatonin seems to act in antioxidant protection, as a growth promoter, and in photoperiodism. However, the mechanisms by which melatonin carries out these roles remain unclear.…	JOURNAL OF PINEAL RESEARCH	2010	10.1111/j.1600-079X.2010.00788.x	Okazaki, Masateru	Ezura, Hiroshi	4	0	1	0	0	1	1	0	0	0	0	0	0	0	0	0	0	0	0	0	0	0	0	1	1	0	0	0	0	0	0	0	0	0	0	0	0	0	0	0	0	0
Melatonin enhances cold tolerance in drought-primed wild-type and abscisic acid-deficient mutant barley	Li, Xiangnan; Tan, Dun-Xian; Jiang, Dong; Liu, Fulai	Melatonin is involved in multiple plant developmental processes and various stress responses. To explore the roles of melatonin played as well as its association with abscisic acid (ABA) in a process of drought priming-induced cold tolerance (DPICT), a wild-type barley and its ABA-deficient mutant Az34 counterpart were selected for comparison, in which the effects of melatonin application (either…	JOURNAL OF PINEAL RESEARCH	2016	10.1111/jpi.12350	Li, Xiangnan	Liu, Fulai	4	0	0	0	1	1	0	0	0	0	0	0	0	0	0	0	0	0	0	0	0	0	0	0	1	0	0	0	0	0	0	0	0	0	0	0	0	0	0	1	0	0
Melatonin increased maize (Zea mays L.) seedling drought tolerance by alleviating drought-induced photosynthetic inhibition and oxidative damage	Ye, Jun; Wang, Shiwen; Deng, Xiping; Yin, Lina; Xiong, Binglin; Wang, Xinyue	The effect of melatonin application on enhancing plant stress tolerance is already known, but the specifics of its performance and its underlying mechanism are still poorly understood. The influences of foliar-sprayed melatonin (100 mu mol/L) on maize (Zea mays L.) seedlings growth during drought stress were investigated in this study. The growth of seedlings was not affected by melatonin applica…	ACTA PHYSIOLOGIAE PLANTARUM	2016	10.1007/s11738-015-2045-y	Ye, Jun	Wang, Xinyue	6	0	0	0	0	0	0	0	0	0	0	0	0	0	0	0	0	0	0	0	0	0	0	0	1	0	1	1	0	0	0	0	0	0	0	0	0	0	0	0	0	0
Effects of melatonin treatment on the postharvest quality of strawberry fruit	Liu, Changhong; Zheng, Huanhuan; Sheng, Kangliang; Liu, Wei; Zheng, Lei	The effects of exogenous melatonin on postharvest life and quality in strawberry fruit after harvest were evaluated. To explore the optimum concentration of melatonin treatment, strawberry fruit were treated with 0, 0.01, 0.1, 1 and 10 mmol L-1 melatonin for 5 min and then stored at 4 degrees C and 90% RH for 12 d. The results showed that application of melatonin at 0.1 or 1 mmol L-1 was notably …	POSTHARVEST BIOLOGY AND TECHNOLOGY	2018	10.1016/j.postharvbio.2018.01.016	Liu, Changhong	Zheng, Lei	5	0	0	0	1	1	0	0	0	0	0	0	0	0	0	0	0	0	0	0	0	0	0	0	1	0	1	1	0	0	0	0	0	0	0	0	0	0	1	0	0	0
Cloning of Arabidopsis serotonin N-acetyltransferase and its role with caffeic acid O-methyltransferase in the biosynthesis of melatonin in vitro despite their different subcellular localizations	Lee, Hyoung Yool; Byeon, Yeong; Lee, Kyungjin; Lee, Hye-Jung; Back, Kyoungwhan	Serotonin N-acetyltransferase (SNAT) is the penultimate enzyme in melatonin biosynthesis. We cloned SNAT from Arabidopsis thaliana (AtSNAT) and functionally characterized this enzyme for the first time from dicotyledonous plants. Similar to rice SNAT, AtSNAT was found to localize to chloroplasts with peak enzyme activity at 45 degrees C (K-m, 309m; V-max, 1400pmol/min/mg protein). AtSNAT also cat…	JOURNAL OF PINEAL RESEARCH	2014	10.1111/jpi.12181	Lee, Hyoung Yool	Back, Kyoungwhan	5	0	0	0	0	0	0	0	0	0	0	0	0	0	0	0	0	0	0	0	1	0	0	0	0	0	0	0	0	0	0	0	0	0	0	0	0	0	0	0	0	0
Growth conditions influence the melatonin content of tomato plants	Banon Arnao, Marino; Hernandez-Ruiz, Josefa	Melatonin (N-acetyl-5-methoxytryptamine) is an interesting molecule with well-known functions in vertebrates. Since its discovery in plants in 1995, many data indicate that its role as a cellular antioxidant is very relevant. Agents that induce stress cause increased melatonin levels in plant organs and melatonin levels fluctuate over the light:dark cycle; there are also conflicting data on the i…	FOOD CHEMISTRY	2013	10.1016/j.foodchem.2012.10.077	Banon Arnao, Marino	Hernandez-Ruiz, Josefa	2	0	1	1	0	0	0	0	0	0	0	0	0	0	0	0	0	0	0	0	0	0	0	0	1	0	0	0	0	0	0	0	1	0	0	0	0	0	0	0	0	0
Distribution of Melatonin in Different Zones of Lupin and Barley Plants at Different Ages in the Presence and Absence of Light	Hernandez-Ruiz, J.; Arnao, M. B.	In animals, melatonin (N-acetyl-5-methoxytryptamine) has several physiological roles, mostly related with circadian and seasonal rhythms. In 1995, it was detected in a variety of edible plants, and it is known that melatonin from plant foods is absorbed from the gastrointestinal tract and incorporated in the blood stream. This indoleamine also crosses the blood-brain barrier and the placenta, bei…	JOURNAL OF AGRICULTURAL AND FOOD CHEMISTRY	2008	10.1021/jf8022063	Hernandez-Ruiz, J.	Arnao, M. B.	2	1	1	1	0	0	0	0	0	0	0	0	0	0	0	0	0	0	0	0	0	0	0	0	0	1	0	0	0	1	0	0	1	0	0	0	0	0	0	0	0	0
A metabolomic analysis of medicinal diversity in Huang-qin (Scutellaria baicalensis Georgi) genotypes: discovery of novel compounds	Murch, SJ; Rupasinghe, HP; Goodenowe, D; Saxena, PK	In vitro manipulation of plant regeneration in the Chinese medicinal species Scutellaria baicalensis Georgi (Huang-qin) resulted in 26 chemically distinct germplasm lines. Antioxidant potential, growth rate and concentration of baicalin, baicalein, melatonin, and wogonin were the selective markers used to identify elite lines. Metabolomic analysis of a subset of the most distinct lines revealed t…	PLANT CELL REPORTS	2004	10.1007/s00299-004-0862-3	Murch, SJ	Saxena, PK	4	1	0	0	0	0	0	0	0	0	0	0	0	0	0	0	0	0	0	0	0	0	0	0	1	0	0	0	0	0	0	0	0	0	0	0	0	0	0	0	0	0
Overexpression of rice serotonin N-acetyltransferase 1 in transgenic rice plants confers resistance to cadmium and senescence and increases grain yield	Lee, Kyungjin; Back, Kyoungwhan	While ectopic overexpression of serotonin N-acetyltransferase (SNAT) in plants has been accomplished using animal SNAT genes, ectopic overexpression of plant SNAT genes in plants has not been investigated. Because the plant SNAT protein differs from that of animals in its subcellular localization and enzyme kinetics, its ectopic overexpression in plants would be expected to give outcomes distinct…	JOURNAL OF PINEAL RESEARCH	2017	10.1111/jpi.12392	Lee, Kyungjin	Back, Kyoungwhan	2	0	1	1	0	0	1	0	0	0	0	0	0	0	0	0	0	0	0	0	0	0	0	0	0	0	0	0	0	0	0	1	0	0	0	0	0	0	1	0	0	0
Melatonin Improved Anthocyanin Accumulation by Regulating Gene Expressions and Resulted in High Reactive Oxygen Species Scavenging Capacity in Cabbage	Zhang, Na; Sun, Qianqian; Li, Hongfei; Li, Xingsheng; Cao, Yunyun; Zhang, Haijun; Li, Shuangtao; Zhang, Lei; Qi, Yan; Ren, Shuxin; Zhao, Bing; Guo, Yang-Dong	In this work, we found, that exogenous melatonin pretreatment improved anthocyanin accumulation (1- to 2 -fold) in cabbage. To verify the relationship with melatonin and anthocyanin, an Arabidopsis mutant, snat, which expresses a defective form of the melatonin biosynthesis enzyme SNAT (Serotonin N-acetyl transferase), was employed. Under cold conditions, the foliage of wild-type Arabidopsis exhi…	FRONTIERS IN PLANT SCIENCE	2016	10.3389/fpls.2016.00197	Zhang, Na	Guo, Yang-Dong	12	0	0	0	1	0	0	0	0	0	0	0	0	0	0	0	0	0	0	0	0	0	0	0	1	1	0	0	0	0	0	0	0	0	0	0	0	1	0	0	0	0
Melatonin stimulates the expansion of etiolated lupin cotyledons	Hernandez-Ruiz, Josefa; Arnao, Marino B.	Melatonin (N-acetyl-5-methoxytryptamine) is an indoleamine which is structurally related to tryptophan, serotonin and indole-3-acetic acid (IAA), among other important substances. Many studies have clearly demonstrated its presence in different plant organs, including roots, stems, leaves, flowers, fruits and seeds. Since it discovery in plants in 1995, authors have postulated many physiological …	PLANT GROWTH REGULATION	2008	10.1007/s10725-008-9254-y	Hernandez-Ruiz, Josefa	Arnao, Marino B.	2	0	1	0	0	1	0	0	0	0	0	0	0	0	0	0	0	0	0	0	0	0	0	0	0	0	0	0	0	0	0	0	0	0	0	0	0	0	0	0	0	0
Melatonin is a phytochemical in olive oil	de la Puerta, Cristina; Carrascosa-Salmoral, Maria P.; Garcia-Luna, Pedro P.; Lardone, Patricia J.; Herrera, Juan L.; Fernandez-Montesinos, Rafael; Guerrero, Juan M.; Pozo, David	Given the numerous observations regarding the positive effects of olive oil consumption and the presence of melatonin in edible plants, we addressed for the first time the question of melatonin determination in virgin olive oil. All the extra virgin olive oil registered designation of origins from Spain and commercial samples of refined olive and sunflower oil were used. Immunoprecipitation and E…	FOOD CHEMISTRY	2007	10.1016/j.foodchem.2006.12.010	de la Puerta, Cristina	Pozo, David	8	1	0	1	0	0	0	0	0	0	0	0	0	0	0	0	0	0	0	0	0	0	0	0	0	0	0	0	0	0	0	0	0	0	0	0	0	0	0	0	0	0
Effects of melatonin on seedling growth, mineral nutrition, and nitrogen metabolism in cucumber under nitrate stress	Zhang, Ruimin; Sun, Yunkuo; Liu, Zeyu; Jin, Wen; Sun, Yan	In China, excessive use of nitrogen fertilizers in glasshouses leads to nitrate accumulations in soil and plants, which then limits productivity. Melatonin, an evolutionarily highly conserved molecule, has a wide range of functions in plants. We analyzed the effects of melatonin pretreatment on the growth, mineral nutrition, and nitrogen metabolism in cucumber (Cucumis sativus L. Jin You No. 1) w…	JOURNAL OF PINEAL RESEARCH	2017	10.1111/jpi.12403	Zhang, Ruimin	Sun, Yan	5	0	0	0	1	0	0	0	0	0	0	0	0	0	0	0	0	0	0	0	0	0	0	1	0	0	0	0	0	0	0	0	0	0	0	0	0	0	0	0	0	0
Melatonin is required for H2O2- and NO-mediated defense signaling through MAPKKK3 and OXI1 in Arabidopsis thaliana	Lee, Hyoung Yool; Back, Kyoungwhan	Melatonin influences plant innate immunity through the mitogen-activated protein kinase (MAPK) pathway. However, the most upstream MAPK component in melatonin signaling and the dependence of generation of a reactive oxygen species (ROS) burst on melatonin synthesis and signaling remain unclear. In this study, treatment of several mekk (alias mapkkk)-knockout Arabidopsis mutants with melatonin rev…	JOURNAL OF PINEAL RESEARCH	2017	10.1111/jpi.12379	Lee, Hyoung Yool	Back, Kyoungwhan	2	0	0	0	0	0	1	0	0	0	0	0	0	0	0	0	0	0	0	0	0	0	0	0	0	1	1	0	0	0	0	0	0	0	0	0	0	0	0	0	0	0
A label-free differential proteomics analysis reveals the effect of melatonin on promoting fruit ripening and anthocyanin accumulation upon postharvest in tomato	Sun, Qianqian; Zhang, Na; Wang, Jinfang; Cao, Yunyun; Li, Xingsheng; Zhang, Haijun; Zhang, Lei; Tan, Dun-Xian; Guo, Yang-Dong	To better understand the function of melatonin in tomato fruit ripening and quality improvement, a label-free quantitation method was used to investigate the proteins that differ between the control (CK) and 50 m melatonin treatment (M50) fruits. Proteomics data identified 241 proteins that were significantly influenced by melatonin. These proteins were involved in several ripening-related pathwa…	JOURNAL OF PINEAL RESEARCH	2016	10.1111/jpi.12315	Sun, Qianqian	Guo, Yang-Dong	9	0	1	0	1	0	0	0	0	0	0	0	0	0	0	0	0	0	0	0	0	0	0	1	0	0	0	0	0	0	0	0	0	0	0	0	0	1	1	0	0	0
DETECTION AND QUANTIFICATION OF MELATONIN IN A DINOFLAGELLATE, GONYAULAX-POLYEDRA - SOLUTIONS TO THE PROBLEM OF METHOXYINDOLE DESTRUCTION IN NON-VERTEBRATE MATERIAL	POEGGELER, B; HARDELAND, R	Preservative procedures are described for the extraction and quantification of melatonin in cell material from the dinoflagellate Gonyaulax polyedra, an organism in which this indoleamine is rapidly degraded due to interaction with free oxygen radicals and photooxidation. Cells were shock-frozen in liquid nitrogen and pulverized. Various extraction methods were applied to the powder, and rates of…	JOURNAL OF PINEAL RESEARCH	1994	10.1111/j.1600-079X.1994.tb00106.x	POEGGELER, B	HARDELAND, R	2	0	0	0	0	0	0	0	0	0	0	0	0	0	0	0	0	0	0	0	0	0	0	0	0	0	0	0	0	0	0	0	0	0	0	0	0	0	0	0	0	0
Melatonin confers plant tolerance against cadmium stress via the decrease of cadmium accumulation and reestablishment of microRNA-mediated redox homeostasis	Gu, Quan; Chen, Ziping; Yu, Xiuli; Cui, Weiti; Pan, Jincheng; Zhao, Gan; Xu, Sheng; Wang, Ren; Shen, Wenbiao	Although melatonin-alleviated cadmium (Cd) toxicity both in animals and plants have been well studied, little is known about its regulatory mechanisms in plants. Here, we discovered that Cd stress stimulated the production of endogenous melatonin in alfalfa seedling root tissues. The pretreatment with exogenous melatonin not only increased melatonin content, but also alleviated Cd-induced seedlin…	PLANT SCIENCE	2017	10.1016/j.plantsci.2017.05.001	Gu, Quan	Shen, Wenbiao	9	0	0	1	1	1	1	0	0	0	0	0	0	0	0	0	0	0	0	0	0	0	0	0	0	1	0	0	1	0	0	0	0	0	0	0	0	0	0	0	0	0
Melatonin improves antioxidant capacity and ion homeostasis and enhances salt tolerance in maize seedlings	Jiang, Chaoqiang; Cui, Quanren; Feng, Kun; Xu, Dafeng; Li, Chengfeng; Zheng, Qingsong	Melatonin (N-acetyl-5-methoxytryptamine) is a biological hormone involved in many important physiological processes in plants. To better understand the protective roles of melatonin in plants against salt stress, we determined the effects of exogenous melatonin (1 mu M) on plant growth, photosynthesis, antioxidant enzyme activity and ion homeostasis in maize plants under 100 mM NaCl. Results show…	ACTA PHYSIOLOGIAE PLANTARUM	2016	10.1007/s11738-016-2101-2	Jiang, Chaoqiang	Zheng, Qingsong	6	0	0	0	1	0	0	0	0	0	0	0	0	0	0	0	0	0	0	0	0	0	0	0	1	0	0	0	0	0	0	0	0	0	1	0	0	0	0	0	0	0
Melatonin regulates carbohydrate metabolism and defenses against Pseudomonas syringae pv. tomato DC3000 infection in Arabidopsis thaliana	Zhao, Hongbo; Xu, Lingfei; Su, Tao; Jiang, Yang; Hu, Lingyu; Ma, Fengwang	Melatonin has been reported to promote plant growth and development. Our experiments with Arabidopsis thaliana showed that exogenous applications of this molecule mediated invertase inhibitor (C/VIF)-regulated invertase activity and enhanced sucrose metabolism. Hexoses were accumulated in response to elevated activities by cell wall invertase (CWI) and vacuolar invertase (VI). Analyses of sugar m…	JOURNAL OF PINEAL RESEARCH	2015	10.1111/jpi.12245	Zhao, Hongbo	Ma, Fengwang	6	0	1	1	1	0	0	0	0	0	0	0	0	0	0	0	0	0	0	0	0	0	0	1	0	1	0	0	0	0	0	0	0	0	0	0	0	0	0	0	0	1
Elevated production of melatonin in transgenic rice seeds expressing rice tryptophan decarboxylase	Byeon, Yeong; Park, Sangkyu; Lee, Hyoung Yool; Kim, Young-Soon; Back, Kyoungwhan	A major goal of plant biotechnology is to improve the nutritional qualities of crop plants through metabolic engineering. Melatonin is a well-known bioactive molecule with an array of health-promoting properties, including potent antioxidant capability. To generate melatonin-rich rice plants, we first independently overexpressed three tryptophan decarboxylase isogenes in the rice genome. Melatoni…	JOURNAL OF PINEAL RESEARCH	2014	10.1111/jpi.12120	Byeon, Yeong	Back, Kyoungwhan	5	0	1	1	0	0	1	0	0	0	0	0	0	0	0	0	0	0	0	0	0	0	0	0	1	0	0	0	0	0	0	0	0	0	0	0	0	0	0	0	0	0
From vineyard to glass: agrochemicals enhance the melatonin and total polyphenol contents and antiradical activity of red wines	Vitalini, Sara; Gardana, Claudio; Zanzotto, Alessandro; Fico, Gelsomina; Faoro, Franco; Simonetti, Paolo; Iriti, Marcello	Resistance inducers are a class of agrochemicals, including benzothiadiazole and chitosan, which activate the plant own defence mechanisms. In this work, open-field treatments with plant activators were performed on two red grape (Vitis vinifera L.) varieties cultivated in different localities, Groppello (Brescia, Lombardia, Italy) and Merlot (Treviso, Veneto, Italy). Treatments were carried out …	JOURNAL OF PINEAL RESEARCH	2011	10.1111/j.1600-079X.2011.00887.x	Vitalini, Sara	Iriti, Marcello	7	0	1	1	0	0	0	0	0	0	0	0	0	0	0	0	0	0	0	0	0	0	0	0	0	0	0	0	0	0	0	0	0	0	0	0	0	0	0	0	0	0
Melatonin attenuates postharvest physiological deterioration of cassava storage roots	Ma, Qiuxiang; Zhang, Ting; Zhang, Peng; Wang, Zhen-Yu	Melatonin reportedly increases abiotic and biotic stress tolerance in plants, but information on its in vivo effects during postharvest physiological deterioration (PPD) in cassava is limited. In this study, we investigated the effect of melatonin in regulating cassava PPD. Treatment with 500 mg/L melatonin significantly delayed cassava PPD and reduced the accumulation of hydrogen peroxide (H2O2)…	JOURNAL OF PINEAL RESEARCH	2016	10.1111/jpi.12325	Ma, Qiuxiang	Wang, Zhen-Yu	4	0	1	1	1	1	0	0	0	0	0	0	0	0	0	0	0	0	0	0	0	0	0	0	0	1	1	0	1	0	0	0	0	0	0	0	0	0	0	0	0	0
Determination of melatonin and its isomer in foods by liquid chromatography tandem mass spectrometry	Kocadagli, Tolgahan; Yilmaz, Cemile; Gokmen, Vural	This study aimed to develop a reliable analytical method for the determination of melatonin and its isomers in various food products. The method entails ethanol extraction of solid samples (or dilution of liquid samples) prior to liquid chromatography coupled to triple quadruple mass spectrometry (LC-MS/MS) analysis of target analytes. The method was in-house validated and successfully applied to…	FOOD CHEMISTRY	2014	10.1016/j.foodchem.2013.12.036	Kocadagli, Tolgahan	Gokmen, Vural	3	0	1	1	0	0	0	0	0	0	0	0	0	0	0	0	0	0	0	0	0	0	0	0	0	0	0	0	0	0	0	0	0	0	0	0	0	0	0	0	0	0
Cloning and characterization of a Chlamydomonas reinhardtii cDNA arylalkylamine N-acetyltransferase and its use in the genetic engineering of melatonin content in the Micro-Tom tomato	Okazaki, Masateru; Higuchi, Kenji; Hanawa, Yutaka; Shiraiwa, Yoshihiro; Ezura, Hiroshi	Melatonin is found in a wide variety of plant species. Several investigators have studied the physiological roles of melatonin in plants. However, its role is not well understood because of the limited information on its biosynthetic pathway. To clarify melatonin biosynthesis in plants, we isolated a cDNA-coded arylalkylamine N-acetyltransferase (AANAT), a possible limiting enzyme for melatonin b…	JOURNAL OF PINEAL RESEARCH	2009	10.1111/j.1600-079X.2009.00673.x	Okazaki, Masateru	Ezura, Hiroshi	5	0	1	1	0	0	1	0	0	0	0	0	0	0	0	0	0	0	0	0	0	0	0	0	0	0	0	0	0	0	0	0	0	0	0	0	0	0	0	0	0	0
Melatonin and nitric oxide regulate sunflower seedling growth under salt stress accompanying differential expression of Cu/Zn SOD and Mn SOD	Arora, Dhara; Bhatla, Satish C.	Salinity results in significant reduction in sunflower (Helianthus annuus L.) seedling growth and excessive generation of reactive oxygen species (ROS). Present work highlights the possible role of melatonin as an antioxidant through its interaction with nitric oxide (NO), and as an early and long distance NaCl-stress sensing signaling molecule in seedling cotyledons. Exogenous melatonin (15 mu M…	FREE RADICAL BIOLOGY AND MEDICINE	2017	10.1016/j.freeradbiomed.2017.02.042	Arora, Dhara	Bhatla, Satish C.	2	0	0	0	1	0	0	0	0	0	0	0	0	0	0	0	0	0	0	0	0	0	0	0	1	1	0	0	1	0	0	0	1	0	0	0	0	0	0	0	0	0
Melatonin-Producing Endophytic Bacteria from Grapevine Roots Promote the Abiotic Stress-Induced Production of Endogenous Melatonin in Their Hosts	Jiao, Jian; Ma, Yaner; Chen, Sha; Liu, Chonghuai; Song, Yuyang; Qin, Yi; Yuan, Chunlong; Liu, Yanlin	Endophytes form symbiotic relationships with plants and constitute an important source of phytohormones and bioactive secondary metabolites for their hosts. To date, most studies of endophytes have focused on the influence of these microorganisms on plant growth and physiology and their role in plant defenses against biotic and abiotic stressors; however, to the best of our knowledge, the ability…	FRONTIERS IN PLANT SCIENCE	2016	10.3389/fpls.2016.01387	Jiao, Jian	Liu, Yanlin	8	0	1	1	0	1	0	0	0	0	0	0	0	0	0	0	0	0	0	0	0	0	0	0	0	1	1	1	0	0	0	0	0	0	0	0	0	0	0	0	0	0
Monitoring melatonin and its isomer in Vitis vinifera cv. Malbec by UHPLC-MS/MS from grape to bottle	Vicente Gomez, Federico Jose; Raba, Julio; Cerutti, Soledad; Fernanda Silva, Maria	Several studies have shown the presence of melatonin and related compounds in grapes and wines. The latter provides evidence of the possibility to enhance the nutraceutical properties of premium wines. However, there are many external factors that can influence the levels of this indolamine in grape and wines. In this study, the monitoring of melatonin and its tentatively identified isomer was ca…	JOURNAL OF PINEAL RESEARCH	2012	10.1111/j.1600-079X.2011.00949.x	Vicente Gomez, Federico Jose	Fernanda Silva, Maria	4	0	1	1	0	0	0	0	0	0	0	0	0	0	0	0	0	0	0	0	0	0	0	0	0	0	0	0	0	0	0	0	0	0	0	0	0	0	0	0	0	0
Investigation of the in vitro antioxidant behaviour of some 2-phenylindole derivatives: discussion on possible antioxidant mechanisms and comparison with melatonin	Suzen, Sibel; Bozkaya, Pinar; Coban, Tulay; Nebioglu, Dogu	Oxidative stress has been implicated in the development of many neurodegenerative diseases and also responsible from aging and some cancer types. Indolic compounds are a broad family of substances present in microorganisms, plants and animals. They are mainly related to tryptophan metabolism, and present particular properties that depend on their respective chemical structures. Due to free radica…	JOURNAL OF ENZYME INHIBITION AND MEDICINAL CHEMISTRY	2006	10.1080/14756360500381210	Suzen, Sibel	Nebioglu, Dogu	4	0	0	0	0	0	0	0	0	0	0	0	0	0	0	0	0	0	0	0	0	0	0	1	1	0	0	0	1	0	0	0	0	0	0	0	0	0	0	0	0	0
Free radical-scavenging activity of indolic compounds in aqueous and ethanolic media	Cano, A; Alcaraz, O; Arnao, MB	Indolic compounds are a broad family of substances present in microorganisms, plants and animals. They are mainly related with tryptophan metabolism, and present particularities that depend on their respective chemical structures. The most important members of the family are the plant hormone, indole-3-acetic acid, and the animal hormone, melatonin. An important characteristic of some indolic com…	ANALYTICAL AND BIOANALYTICAL CHEMISTRY	2003	10.1007/s00216-003-1848-7	Cano, A	Arnao, MB	3	0	0	0	0	0	0	0	0	0	0	0	0	0	0	0	0	0	0	0	0	0	0	1	1	0	1	0	0	0	0	0	0	0	0	0	0	0	0	0	0	0
Exogenous Melatonin Improves Antioxidant Defensein Cucumber Seeds (Cucumis sativus L.) Germinated under Chilling Stress	Balabusta, Marta; Szafranska, Katarzyna; Posmyk, Malgorzata M.	The relationship between exogenous melatonin applied into cucumber seeds during osmopriming and modifications of their antioxidant defense was studied. Accumulation of hydrogen peroxide, antioxidant enzyme activities and glutathione pool were investigated in embryonic axes isolated from the control, osmoprimed, and osmoprimed with melatonin seeds. Germinating cucumber seeds are very sensitive to …	FRONTIERS IN PLANT SCIENCE	2016	10.3389/fpls.2016.00575	Balabusta, Marta	Posmyk, Malgorzata M.	3	0	0	0	1	0	0	0	0	0	0	0	0	0	0	0	0	0	0	0	0	0	0	0	1	1	1	0	1	0	0	0	0	0	0	0	0	0	0	0	0	0
Promoting Roles of Melatonin in Adventitous Root Development of Solanum lycopersicum L. by Regulating Auxin and Nitric Oxide Signaling	Wen, Dan; Gong, Biao; Sun, Shasha; Liu, Shiqi; Wang, Xiufeng; Wei, Min; Yang, Fengjuan; Li, Yan; Shi, Qinghua	Melatonin (MT) plays integral roles in regulating several biological processes including plant growth, seed germination, flowering, senescence, and stress responses. This study investigated the effects of MT on adventitious root formation (ARF) of de-rooted tomato seedlings. Exogenous MT positively or negatively influenced ARF, which was dependent on the concentration of MT application. In the pr…	FRONTIERS IN PLANT SCIENCE	2016	10.3389/fpls.2016.00718	Wen, Dan	Shi, Qinghua	9	0	1	0	1	1	0	0	0	0	0	0	0	0	0	0	0	0	0	0	0	0	0	0	0	1	0	0	0	0	0	0	0	0	0	0	0	0	1	0	0	0
Functional analyses of three ASMT gene family members in rice plants	Park, Sangkyu; Byeon, Yeong; Back, Kyoungwhan	N-acetylserotonin methyltransferase (ASMT) is the final enzyme in a biosynthetic pathway that produces melatonin. ASMT may play a rate-limiting role in the production of this bioactive molecule in plants. There are three ASMT genes (ASMT1-ASMT3) in the rice genome, but only ASMT1 has been functionally characterized. A major barrier to further progress in characterizing these genes has been a fail…	JOURNAL OF PINEAL RESEARCH	2013	10.1111/jpi.12088	Park, Sangkyu	Back, Kyoungwhan	3	0	1	1	0	0	1	0	0	0	0	0	0	0	0	0	0	0	0	0	0	0	0	0	0	0	0	0	0	0	0	0	0	0	0	0	0	0	0	0	0	0
Melatonin treatment reduces chilling injury in peach fruit through its regulation of membrane fatty acid contents and phenolic metabolism	Gao, Hui; Lu, ZeMian; Yang, Yue; Wang, DanNa; Yang, Ting; Cao, MaoMao; Cao, Wei	Effects of 0.1 mM melatonin (MT) on chilling injury (CI), membrane fatty acid content and phenolic metabolism in peach fruit were studied during storage at 1 degrees C for 28 days. MT treatment delayed the development of CI in peach fruit, as was illustrated by MT-treated fruit showing lower CI incidence, CI index and firmness loss than the control. MT treatment prevented membrane lipid peroxidat…	FOOD CHEMISTRY	2018	10.1016/j.foodchem.2017.10.008	Gao, Hui	Cao, Wei	7	0	0	0	0	1	0	0	0	0	0	0	0	0	0	0	0	0	0	0	0	0	0	1	0	0	0	0	0	0	0	0	0	0	0	0	0	0	0	0	0	1
Beneficial effects of melatonin in overcoming drought stress in wheat seedlings	Cui, Guibin; Zhao, Xiaoxiao; Liu, Shudong; Sun, Fengli; Zhang, Chao; Xi, Yajun	Melatonin plays an important role in abiotic stress in plant, but its role in wheat drought tolerance is less known. To verify its role, wheat seedlings (Triticum aestivum L Tan 995') at 60% and 40% of field capacity were treated with 500 jtM melatonin in this study. Melatonin treatment significantly enhanced the drought tolerance of wheat seedlings, as demonstrated by decreased membrane damage, …	PLANT PHYSIOLOGY AND BIOCHEMISTRY	2017	10.1016/j.plaphy.2017.06.014	Cui, Guibin	Xi, Yajun	6	0	0	0	0	0	0	0	0	0	0	0	0	0	0	0	0	0	0	0	0	0	0	0	1	0	1	0	1	0	0	0	0	0	0	0	0	0	0	0	0	0
Mitogen-activated protein kinase pathways are required for melatonin-mediated defense responses in plants	Lee, Hyoung Yool; Back, Kyoungwhan	Melatonin enhances pathogen resistance by inducing the expression of a number of plant defense-related genes. To examine whether the melatonin-mediated pathogen resistance is associated with mitogen-activated protein kinase (MAPK) cascades, Arabidopsis and tobacco leaves were treated with melatonin and investigated for MAPK activation using an antiphospho-p44/42 MAPK (Erk1/2) monoclonal antibody.…	JOURNAL OF PINEAL RESEARCH	2016	10.1111/jpi.12314	Lee, Hyoung Yool	Back, Kyoungwhan	2	0	0	0	0	0	1	1	0	1	0	0	0	0	0	0	0	0	0	0	0	0	0	0	0	0	0	0	0	0	0	0	0	0	0	0	0	0	0	0	0	0
Alleviation of cold damage to photosystem II and metabolisms by melatonin in Bermudagrass	Fan, Jibiao; Hu, Zhengrong; Xie, Yan; Chan, Zhulong; Chen, Ke; Amombo, Erick; Chen, Liang; Fu, Jinmin	As a typical warm season grass, Bermudagrass [Cynodon dactylon (L).Pers.] is widely applied in turf systems and animal husbandry. However, cold temperature is a key factor limiting resource utilization for Bermudagrass. Therefore, it is relevant to study the mechanisms by which Burmudagrass responds to cold. Melatonin is a crucial animal and plant hormone that is responsible for plant abiotic str…	FRONTIERS IN PLANT SCIENCE	2015	10.3389/fpls.2015.00925	Fan, Jibiao	Fu, Jinmin	8	1	1	0	0	0	0	0	0	0	0	0	0	0	0	0	0	0	0	0	0	0	0	1	1	0	0	1	1	0	0	0	0	0	1	0	0	0	0	0	0	0
Melatonin pretreatment improves vanadium stress tolerance of watermelon seedlings by reducing vanadium concentration in the leaves and regulating melatonin biosynthesis and antioxidant-related gene expression	Nawaz, Muhammad Azher; Jiao, Yanyan; Chen, Chen; Shireen, Fareeha; Zheng, Zuhua; Imtiaz, Muhammad; Bie, Zhilong; Huang, Yuan	Vanadium (V) is an important heavy metal with ubiquitous presence in the Earth's crust, but limited information is available as to its effect on plants and management strategies. Melatonin is a widely studied biomolecule; it acts as an antioxidant and a signaling molecule that enhances the abiotic stress tolerance of plants. Melatonin improves copper, zinc, and cadmium tolerance in plants. In thi…	JOURNAL OF PLANT PHYSIOLOGY	2018	10.1016/j.jplph.2017.11.003	Nawaz, Muhammad Azher	Huang, Yuan	8	0	1	1	0	0	0	0	0	0	0	0	0	0	0	0	0	0	0	0	0	0	0	0	1	0	1	1	1	0	0	0	0	0	1	0	0	0	0	0	0	0
Identification of genes for melatonin synthetic enzymes in 'Red Fuji' apple (Malus domestica Borkh. cv. Red) and their expression and melatonin production during fruit development	Lei, Qiong; Wang, Lin; Tan, Dun-Xian; Zhao, Yu; Zheng, Xiao-Dong; Chen, Hao; Li, Qing-tian; Zuo, Bi-xiao; Kong, Jin	Melatonin is present in many edible fruits; however, the presence of melatonin in apple has not previously been reported. In this study, the genes for melatonin synthetic enzymes including tryptophan decarboxylase, tryptamine 5-hydroxylase (T5H), arylalkylamine N-acetyltransferase, and N-acetylserotonin methyltransferase were identified in Red Fuji' apple. Each gene has several homologous genes. …	JOURNAL OF PINEAL RESEARCH	2013	10.1111/jpi.12096	Lei, Qiong	Kong, Jin	9	0	1	1	0	0	0	0	0	0	0	0	0	0	0	0	0	0	0	0	0	0	0	0	0	1	0	1	0	0	0	0	0	0	0	0	0	0	0	0	0	0
A genome scale metabolic network for rice and accompanying analysis of tryptophan, auxin and serotonin biosynthesis regulation under biotic stress	Dharmawardhana, Palitha; Ren, Liya; Amarasinghe, Vindhya; Monaco, Marcela; Thomason, Jim; Ravenscroft, Dean; McCouch, Susan; Ware, Doreen; Jaiswal, Pankaj	Functional annotations of large plant genome projects mostly provide information on gene function and gene families based on the presence of protein domains and gene homology, but not necessarily in association with gene expression or metabolic and regulatory networks. These additional annotations are necessary to understand the physiology, development and adaptation of a plant and its interactio…	RICE	2013	10.1186/1939-8433-6-15	Dharmawardhana, Palitha	Jaiswal, Pankaj	9	0	0	0	0	0	0	0	0	0	0	0	0	0	0	0	0	0	0	0	0	0	0	1	0	0	0	0	0	0	1	0	0	0	0	0	0	0	0	0	0	0
Melatonin combined with ascorbic acid provides salt adaptation in Citrus aurantium L. seedlings	Kostopoulou, Zacharoula; Therios, Ioannis; Roumeliotis, Efstathios; Kanellis, Angelos K.; Molassiotis, Athanassios	Ascorbic acid (AsA) and melatonin (Mel) are known molecules participating in stress resistance, however, their combined role in counteracting the impact of salinity in plants is still unknown. In this work the effect of exogenous application of 0.50 mM AsA, 1 mu M Mel and their combination (AsA + Mel) on various stress responses in leaves and roots of Citrus aurantium L. seedlings grown under 100…	PLANT PHYSIOLOGY AND BIOCHEMISTRY	2015	10.1016/j.plaphy.2014.11.021	Kostopoulou, Zacharoula	Molassiotis, Athanassios	5	0	0	0	1	0	0	0	0	0	0	0	0	0	0	0	0	0	0	0	0	0	0	1	1	0	0	0	0	0	0	0	0	0	0	0	0	0	0	0	0	0
Production of melatonin by Saccharomyces strains under growth and fermentation conditions	Isabel Rodriguez-Naranjo, Maria; Jesus Torija, Maria; Mas, Albert; Cantos-Villar, Emma; Garcia-Parrilla, Maria Carmen	Melatonin is a bioactive compound that is present in wine because it is contained in vinification grapes and synthesized by yeast during alcoholic fermentation. The purpose of this study was to determine the capacity of various Saccharomyces strains to form melatonin during its growth and alcoholic fermentation. A selection of yeasts including six S. cerevisiae (Lalvin CLOS, Lalvin ICV-D254, Enof…	JOURNAL OF PINEAL RESEARCH	2012	10.1111/j.1600-079X.2012.00990.x	Isabel Rodriguez-Naranjo, Maria	Garcia-Parrilla, Maria Carmen	5	0	1	1	0	0	0	0	0	0	0	0	0	0	0	0	0	0	0	0	0	0	0	0	0	1	0	0	0	0	0	0	0	1	0	0	0	0	0	0	0	0
The presence of melatonin in grapevine (Vitis vinifera L.) berry tissues	Vitalini, Sara; Gardana, Claudio; Zanzotto, Alessandro; Simonetti, Paolo; Faoro, Franco; Fico, Gelsomina; Iriti, Marcello	Melatonin has been reported in a variety of food plants and, consequently, in a number of plant-derived foodstuffs. In grapevine (Vitis vinifera L.) products, it was found in berry exocarp (skin) of different cultivars and monovarietal wines. Herein, we assessed, by means of mass spectrometry, the occurrence of melatonin in all berry tissues (skin, flesh, and seed) at two different phenological s…	JOURNAL OF PINEAL RESEARCH	2011	10.1111/j.1600-079X.2011.00893.x	Vitalini, Sara	Iriti, Marcello	7	1	1	1	0	0	0	0	0	0	0	0	0	0	0	0	0	0	0	0	0	0	0	0	0	0	0	0	0	0	0	0	0	0	0	0	0	0	0	0	0	0
Exogenous Melatonin Alleviates Cold Stress by Promoting Antioxidant Defense and Redox Homeostasis in Camellia sinensis L.	Li, Xin; Wei, Ji-Peng; Scott, Eric R.; Liu, Jian-Wei; Guo, Shuai; Li, Yang; Zhang, Lan; Han, Wen-Yan	The unprecedented early spring frost that appears as a cold stress adversely affects growth and productivity in tea (Camellia sinensis L.); therefore, it is indispensable to develop approaches to improve the cold tolerance of tea. Here, we investigated the effect of pretreatment with exogenous melatonin on the net photosynthetic rate, the maximum photochemical efficiency of PSII, chlorophyll cont…	MOLECULES	2018	10.3390/molecules23010165	Li, Xin	Han, Wen-Yan	8	0	0	0	1	0	0	0	0	0	0	0	0	0	0	0	0	0	0	0	0	0	0	0	1	1	0	0	0	0	0	0	0	0	1	0	0	0	0	0	0	0
The mode of action of thidiazuron: auxins, indoleamines, and ion channels in the regeneration of Echinacea purpurea L.	Jones, Maxwell P. A.; Cao, Jin; O'Brien, Rob; Murch, Susan J.; Saxena, Praveen K.	The biochemical mechanisms underlying thidiazuron (TDZ)-induced regeneration in plant cells have not been clearly elucidated. Exposure of leaf explants of Echinacea purpurea to a medium containing TDZ results in undifferentiated cell proliferation and differentiated growth as mixed shoot organogenesis and somatic embryogenesis. The current studies were undertaken to determine the potential roles …	PLANT CELL REPORTS	2007	10.1007/s00299-007-0357-0	Jones, Maxwell P. A.	Saxena, Praveen K.	5	1	0	0	0	1	0	0	0	0	0	0	0	0	0	0	0	0	0	0	0	0	0	0	0	0	0	0	0	0	0	0	0	0	0	0	0	0	0	0	0	0
Molecular cloning and functional analysis of serotonin N-acetyltransferase from the cyanobacterium Synechocystis sp PCC 6803	Byeon, Yeong; Lee, Kyungjin; Park, Youn-Il; Park, Sangkyu; Back, Kyoungwhan	Serotonin N-acetyltransferase (SNAT) catalyzes conversion of serotonin into N-acetylserotonin, which is a direct precursor for melatonin biosynthesis in all organisms. Molecular cloning of plant SNAT from rice led to a screening for SNAT homolog genes in other species. We identified a cyanobacterium SNAT-like gene (cSNAT) that showed 56% amino acid homology with the rice SNAT. To confirm whether …	JOURNAL OF PINEAL RESEARCH	2013	10.1111/jpi.12080	Byeon, Yeong	Back, Kyoungwhan	5	0	0	0	0	0	0	0	0	0	0	0	0	0	0	0	0	0	0	0	0	0	0	0	0	0	0	0	0	0	0	0	0	0	0	0	0	0	0	0	0	0
Melatonin and serotonin: Mediators in the symphony of plant morphogenesis	Erland, Lauren A. E.; Shukla, Mukund R.; Singh, Amritpal S.; Murch, Susan J.; Saxena, Praveen K.	Melatonin and serotonin are important signaling and stress mitigating molecules that play important roles across growth and development in plants. Despite many well-documented responses, a systematic investigation of the entire metabolic pathway (tryptophan, tryptamine, and N-acetylserotonin) does not exist, leaving many open questions. The objective of this study was to determine the responses o…	JOURNAL OF PINEAL RESEARCH	2018	10.1111/jpi.12452	Erland, Lauren A. E.	Saxena, Praveen K.	5	0	1	1	0	0	0	0	0	0	0	0	0	0	0	0	0	0	0	0	0	0	0	0	0	1	0	0	0	0	0	0	0	0	0	0	0	0	0	1	0	1
The AtrbohF-dependent regulation of ROS signaling is required for melatonin-induced salinity tolerance in Arabidopsis	Chen, Ziping; Xie, Yanjie; Gu, Quan; Zhao, Gan; Zhang, Yihua; Cui, Weiti; Xu, Sheng; Wang, Ren; Shen, Wenbiao	Although several literatures confirmed the beneficial roles of exogenous melatonin in the enhancement of salinity tolerance in plants, whether or how endogenous melatonin confers plant salinity tolerance is still elusive. In the report, we observed impaired melatonin level and salinity hypersensitivity in atsnat, the Arabidopsis melatonin synthesis mutant. Above hypersensitivity was rescued by me…	FREE RADICAL BIOLOGY AND MEDICINE	2017	10.1016/j.freeradbiomed.2017.04.009	Chen, Ziping	Shen, Wenbiao	9	0	0	0	1	1	0	0	0	0	0	0	0	0	0	0	0	0	0	0	0	0	0	0	1	1	1	0	0	0	0	0	0	0	0	0	0	0	0	0	0	0
Melatonin enhances the recovery of cryopreserved shoot tips of American elm (Ulmus americana L.)	Uchendu, Esther E.; Shukla, Mukund R.; Reed, Barbara M.; Saxena, Praveen K.	Climate change and global migrations of people and goods have exposed trees to new diseases and abiotic challenges that threaten the survival of species. In vitro germplasm storage via cryopreservation is an effective tool to ensure conservation of tree species, but plant cells and tissues are exposed to multiple stresses during the cryopreservation process. The current study was designed to eval…	JOURNAL OF PINEAL RESEARCH	2013	10.1111/jpi.12094	Uchendu, Esther E.	Saxena, Praveen K.	4	0	0	0	0	0	0	0	0	0	0	0	0	0	0	0	0	0	0	0	0	0	0	0	1	0	0	0	0	0	0	0	0	0	0	0	0	0	0	0	0	0
Unveiling the mechanism of melatonin impacts on maize seedling growth: sugar metabolism as a case	Zhao, Hongbo; Su, Tao; Huo, Liuqing; Wei, Hongbin; Jiang, Yang; Xu, Lingfei; Ma, Fengwang	Melatonin regulates growth in many plants; however, the mechanism remains unclear. In this study, exogenous melatonin feeding resulted in both promotional (10m) and inhibitory (100m) effects on maize seedling growth. Initial analyses suggested positive correlations between the amount of melatonin and sucrose synthesis and hydrolysis-related gene expression, enzyme activities, and sucrose metaboli…	JOURNAL OF PINEAL RESEARCH	2015	10.1111/jpi.12258	Zhao, Hongbo	Ma, Fengwang	7	0	1	1	1	0	0	0	0	0	0	0	0	0	0	0	0	0	0	0	0	0	0	1	0	1	0	0	0	0	0	0	1	0	0	0	0	0	0	0	0	0
Exogenous melatonin enhances salt stress tolerance in maize seedlings by improving antioxidant and photosynthetic capacity	Chen, Yang-Er; Mao, Jing-Jing; Sun, Liang-Qi; Huang, Bo; Ding, Chun-Bang; Gu, Yu; Liao, Jin-Qiu; Hu, Chao; Zhang, Zhong-Wei; Yuan, Shu; Yuan, Ming	Melatonin (N-acetyl-5-methoxytryptamine) is an important biological hormone in many abiotic stress responses and developmental processes. In this study, the protective roles of melatonin were investigated by measuring the antioxidant defense system and photosynthetic characteristics in maize under salt stress. The results indicated that NaCl treatment led to the decrease in plant growth, chloroph…	PHYSIOLOGIA PLANTARUM	2018	10.1111/ppl.12737	Chen, Yang-Er	Yuan, Ming	11	0	0	1	1	0	0	0	0	0	0	0	0	0	0	0	0	0	0	0	0	0	0	0	1	1	0	0	0	0	0	0	0	0	1	0	0	0	0	0	0	0
Identification, transcriptional and functional analysis of heat-shock protein 90s in banana (Musa acuminata L.) highlight their novel role in melatonin-mediated plant response to Fusarium wilt	Wei, Yunxie; Hu, Wei; Wang, Qiannan; Zeng, Hongqiu; Li, Xiaolin; Yan, Yu; Reiter, Russel J.; He, Chaozu; Shi, Haitao	As one popular fresh fruit, banana (Musa acuminata) is cultivated in the world's subtropical and tropical areas. In recent years, pathogen Fusarium oxysporum f. sp. cubense (Foc) has been widely and rapidly spread to banana cultivated areas, causing substantial yield loss. However, the molecular mechanism of banana response to Foc remains unclear, and functional identification of disease-related …	JOURNAL OF PINEAL RESEARCH	2017	10.1111/jpi.12367	Wei, Yunxie	Shi, Haitao	9	0	0	0	1	0	0	0	0	0	0	0	0	0	0	0	0	0	0	0	0	0	0	0	0	1	0	0	0	0	0	0	1	0	0	0	0	0	0	0	0	0
Melatonin Regulates Root Meristem by Repressing Auxin Synthesis and Polar Auxin Transport in Arabidopsis	Wang, Qiannan; An, Bang; Wei, Yunxie; Reiter, Russel J.; Shi, Haitao; Luo, Hongli; He, Chaozu	Melatonin (N-acetyl-5-methoxytryptamine) plays important roles in regulating both biotic and abiotic stress tolerance, biological rhythms, plant growth and development. Sharing the same substrate (tryptophan) for the biosynthesis, melatonin and auxin also have similar effects in plant development. However, the specific function of melatonin in modulating plant root growth and the relationship bet…	FRONTIERS IN PLANT SCIENCE	2016	10.3389/fpls.2016.01882	Wang, Qiannan	He, Chaozu	7	0	1	1	0	0	0	0	0	0	0	0	0	0	0	0	0	0	0	0	0	0	0	0	0	0	0	0	0	1	0	0	0	0	0	0	0	0	0	0	0	0
Melatonin biosynthesis requires N-acetylserotonin methyltransferase activity of caffeic acid O-methyltransferase in rice	Byeon, Yeong; Choi, Geun-Hee; Lee, Hyoung Yool; Back, Kyoungwhan	Caffeic acid O-methyltransferase (COMT) methylates N-acetylserotonin into melatonin; that is, it has N-acetylserotonin O-methyltransferase (ASMT) activity. The ASMT activity of COMT was first detected in Arabidopsis thaliana COMT (AtCOMT). To confirm the involvement of COMT on melatonin synthesis in other plant species, the ASMT activity of a COMT from rice (Oryza sativa) (OsCOMT) was evaluated. …	JOURNAL OF EXPERIMENTAL BOTANY	2015	10.1093/jxb/erv396	Byeon, Yeong	Back, Kyoungwhan	4	0	1	1	0	0	1	0	0	0	0	0	0	0	0	0	0	0	0	0	0	0	0	0	0	0	0	0	0	0	0	0	0	0	0	0	0	0	0	0	0	0
Microarray analysis of genes differentially expressed in melatonin-rich transgenic rice expressing a sheep serotonin N-acetyltransferase	Byeon, Yeong; Park, Sangkyu; Kim, Young Soon; Back, Kyoungwhan	Transgenic rice plants overexpressing a sheep serotonin N-acetyltransferase led to an enhanced production of melatonin with various physiological effects, including seminal root elongation and resistance against cold and oxidative stress, which raises the possibility that melatonin may alter gene expression profiles in the transgenic rice. Therefore, we performed a microarray analysis to investig…	JOURNAL OF PINEAL RESEARCH	2013	10.1111/jpi.12077	Byeon, Yeong	Back, Kyoungwhan	4	0	1	1	0	0	1	0	0	0	0	0	0	0	0	0	0	0	0	0	0	0	0	0	0	0	0	0	0	0	0	0	0	0	0	0	0	0	1	0	0	0
In vitro-grown roots: a superior explant for prolific shoot regeneration of St. John's wort (Hypericum perforatum L. cv 'New Stem') in a temporary immersion bioreactor	Zobayed, SMA; Saxena, PK	Hypericum peiforatian L. (St. John's wort) is a traditional medicinal plant, which has been used for the treatment of neurological disorders and depression. In vitro regeneration of St. John's wort provides one approach for mass clonal propagation of this facultative apomictic species. The current study was designed (i) to compare the regeneration potential of several explant types and (ii) to in…	PLANT SCIENCE	2003	10.1016/S0168-9452(03)00064-5	Zobayed, SMA	Saxena, PK	2	0	0	0	0	0	0	0	0	0	0	0	0	0	0	0	0	0	0	0	0	0	0	0	0	0	0	0	0	0	0	0	0	0	0	0	0	0	0	0	0	0
Melatonin alleviates low PS I-limited carbon assimilation under elevated CO2 and enhances the cold tolerance of offspring in chlorophyll b-deficient mutant wheat	Li, Xiangnan; Brestic, Marian; Tan, Dun-Xian; Zivcak, Marek; Zhu, Xiancan; Liu, Shengqun; Song, Fengbin; Reiter, Russel J.; Liu, Fulai	Melatonin is involved in the regulation of carbohydrate metabolism and induction of cold tolerance in plants. The objective of this study was to investigate the roles of melatonin in modulation of carbon assimilation of wild-type wheat and the Chl b-deficient mutant ANK32B in response to elevated CO2 concentration ([CO2]) and the transgenerational effects of application of exogenous melatonin (he…	JOURNAL OF PINEAL RESEARCH	2018	10.1111/jpi.12453	Li, Xiangnan	Liu, Fulai	9	0	0	0	1	0	0	0	0	0	0	0	0	0	0	0	0	0	0	0	0	0	0	1	1	1	0	0	0	0	0	0	0	0	1	0	0	0	0	0	0	0
Effects of Melatonin on Anti-oxidative Systems and Photosystem II in Cold-Stressed Rice Seedlings	Han, Qiao-Hong; Huang, Bo; Ding, Chun-Bang; Zhang, Zhong-Wei; Chen, Yang-Er; Hu, Chao; Zhou, Li-Jun; Huang, Yan; Liao, Jin-Qiu; Yuan, Shu; Yuan, Ming	Melatonin (N-acetyl-5-methoxytryptamine) plays important role in multiple plant developmental processes and stress responses. We investigated the possible mediatory role of melatonin in growth, photosynthesis, and the response to cold stress in rice by using three different experiments: soaking seed; immersing roots, and spraying to leaves with 0, 20, or 100 mu M melatonin. After 6 days of cold s…	FRONTIERS IN PLANT SCIENCE	2017	10.3389/fpls.2017.00785	Han, Qiao-Hong	Yuan, Ming	11	0	1	1	1	0	0	0	0	0	0	0	0	0	0	0	0	0	0	0	0	0	0	0	1	1	0	1	0	0	0	0	0	0	0	0	0	0	0	0	0	0
Cloning and functional characterization of the Arabidopsis N-acetylserotonin O-methyltransferase responsible for melatonin synthesis	Byeon, Yeong; Lee, Hye-Jung; Lee, Hyoung Yool; Back, Kyoungwhan	The N-acetylserotonin O-methyltransferase (ASMT) gene encodes the enzyme that catalyzes the conversion of N-acetylserotonin to melatonin as the last step in melatonin biosynthesis. The first plant ASMT gene to be cloned was from rice. An orthologous gene encoding a protein with ASMT activity and only 39.7% amino acid sequence identity to the rice ASMT protein was recently isolated from apple (Mal…	JOURNAL OF PINEAL RESEARCH	2016	10.1111/jpi.12289	Byeon, Yeong	Back, Kyoungwhan	4	0	0	0	0	0	0	0	0	0	0	0	0	0	0	0	0	0	0	0	0	0	0	0	0	0	0	0	0	0	0	0	0	0	0	0	0	0	0	0	0	0
Melatonin regulates proteomic changes during leaf senescence in Malus hupehensis	Wang, Ping; Sun, Xun; Xie, Yinpeng; Li, Mingjun; Chen, Wei; Zhang, Sheng; Liang, Dong; Ma, Fengwang	Despite the relationship between melatonin and aging, the overall changes and regulation of proteome profiling by long-term melatonin exposure during leaf senescence is not well understood. In this study, leaf senescence in Malus hupehensis plants was delayed when exogenous melatonin was regularly applied to the roots for 2 months compared with natural leaf senescence. Proteins of samples 0 and 5…	JOURNAL OF PINEAL RESEARCH	2014	10.1111/jpi.12169	Wang, Ping	Ma, Fengwang	8	0	0	0	1	0	0	0	0	0	0	0	0	0	0	0	0	0	0	0	0	0	0	0	0	0	0	0	0	0	0	1	0	0	0	0	0	0	1	0	0	0
Local melatonin application induces cold tolerance in distant organs of Citrullus lanatus L. via long distance transport	Li, Hao; Chang, Jingjing; Zheng, Junxian; Dong, Yuchuan; Liu, Qiyan; Yang, Xiaozhen; Wei, Chunhua; Zhang, Yong; Ma, Jianxiang; Zhang, Xian	Melatonin is a ubiquitous chemical substance that regulates plant growth and responses to stress. Several recent studies show that exogenous melatonin confers cold tolerance to plants; however, the underlying mechanisms remain largely unknown. Here, we report that melatonin application at optimal dose, either on the leaves or the roots, not only induced cold stress tolerance in the site of applic…	SCIENTIFIC REPORTS	2017	10.1038/srep40858	Li, Hao	Zhang, Xian	10	0	1	1	1	0	0	0	0	0	0	0	0	0	0	0	0	0	0	0	0	0	0	0	1	0	0	0	0	0	0	0	0	0	0	0	0	0	0	0	0	0
Exogenous Melatonin Treatment Increases Chilling Tolerance and Induces Defense Response in Harvested Peach Fruit during Cold Storage	Cao, Shifeng; Song, Chunbo; Shao, Jiarong; Bian, Kun; Chen, Wei; Yang, Zhenfeng	The effect of exogenous melatonin on chilling injury in peach fruit after harvest was investigated. To explore the optimum concentration of melatonin for chilling tolerance induction, peach fruit were treated with 50, 100, or 200 mu M melatonin for 120 min and then stored for 28 days at 4 degrees C. The results showed that application of melatonin at 100 mu M was most effective in reducing chilli…	JOURNAL OF AGRICULTURAL AND FOOD CHEMISTRY	2016	10.1021/acs.jafc.6b01118	Cao, Shifeng	Yang, Zhenfeng	6	0	1	0	1	0	0	0	0	0	0	0	0	0	0	0	0	0	0	0	0	0	0	0	0	0	0	0	0	0	0	0	0	0	0	0	0	0	0	0	0	0
Comparative metabolomic analysis highlights the involvement of sugars and glycerol in melatonin-mediated innate immunity against bacterial pathogen in Arabidopsis	Qian, Yongqiang; Tan, Dun-Xian; Reiter, Russel J.; Shi, Haitao	Melatonin is an important secondary messenger in plant innate immunity against the bacterial pathogen Pseudomonas syringe pv. tomato (Pst) DC3000 in the salicylic acid (SA)-and nitric oxide (NO)-dependent pathway. However, the metabolic homeostasis in melatonin-mediated innate immunity is unknown. In this study, comparative metabolomic analysis found that the endogenous levels of both soluble sug…	SCIENTIFIC REPORTS	2015	10.1038/srep15815	Qian, Yongqiang	Shi, Haitao	4	0	1	1	1	1	0	0	0	0	0	0	0	0	0	0	0	0	0	0	0	0	0	0	0	1	0	0	0	0	0	0	1	0	0	0	0	0	0	0	0	1
A melatonin-rich germplasm line of St John's wort (Hypericum perforatum L.)	Murch, Susan J.; Saxena, Praveen K.	The objective of this study was to evaluate the possibility of selecting genetic variants of plants with enhanced concentrations of the indoleamine melatonin. A germplasm line of the medicinal plant species, St John's wort (Hypericum perforatum L.), with high levels of melatonin was selected in vitro using mutagenized tissues. The germplasm line has remained stable over a 5-yr period and containe…	JOURNAL OF PINEAL RESEARCH	2006	10.1111/j.1600-079X.2006.00367.x	Murch, Susan J.	Saxena, Praveen K.	2	1	0	0	0	0	0	0	0	0	0	0	0	0	0	0	0	0	0	0	0	0	0	1	1	0	0	0	0	0	0	0	0	0	0	0	0	0	0	0	0	0
Interactions between melatonin and nicotinamide nucleotide: NADH preservation in cells and in cell-free systems by melatonin	Tan, DX; Manchester, LC; Sainz, RM; Mayo, JC; Leon, J; Hardeland, R; Poeggeler, B; Reiter, RJ	Interactions of melatonin and nicotinamide adenine dinucleotide (NADH) have been studied in different experimental models including NADH-promoted oxyhemoglobin oxidation, vanadate-induced NADH oxidation and paraquat-induced NADH depletion in cultured PC12 cells. Our findings indicate that melatonin preserves NADH levels under oxidative stress both in cell-free systems and in cultured PC12 cells. …	JOURNAL OF PINEAL RESEARCH	2005	10.1111/j.1600-079X.2005.00234.x	Tan, DX	Reiter, RJ	8	1	1	1	0	0	0	0	0	0	0	0	0	0	0	0	1	0	0	0	0	0	0	1	1	1	0	0	0	0	0	0	0	0	0	0	0	0	0	0	0	0
Mammalian neurohormones: potential significance in reproductive physiology of St. John's wort (Hypericum perforatum L.)?	Murch, SJ; Saxena, PK	Melatonin and serotonin are indoleamine neurohormones that function as photoperiod signals in many species and have recently been found in St. John's wort, a medicinal plant used in the treatment of depression. There is no known role for melatonin in higher plants but melatonin functions as a signal of changes in photoperiod in other species. In the current study, serotonin and melatonin were qua…	NATURWISSENSCHAFTEN	2002	10.1007/s00114-002-0376-1	Murch, SJ	Saxena, PK	2	1	0	0	0	0	0	0	0	0	0	0	0	0	0	0	0	0	0	0	0	0	0	0	0	1	0	0	0	0	0	0	0	0	0	0	0	0	0	0	0	0
Daily profile of melatonin levels in Chenopodium rubrum L. depends on photoperiod	Wolf, K; Kolar, J; Witters, E; van Dongen, W; van Onckelen, H; Machackova, I	Melatonin is an animal hormone that regulates photoperiodic reactions in many vertebrates. Its level is usually higher at night, and the duration of elevated melatonin levels is proportional to the length of the night, thus giving information about day length. We have previously identified melatonin in the dicotyledonous plant Chenopodium rubrum. We compared melatonin daily profiles in C. rubrum …	JOURNAL OF PLANT PHYSIOLOGY	2001	10.1078/0176-1617-00561	Wolf, K	Machackova, I	6	0	1	0	0	0	0	0	0	0	0	0	0	0	0	0	0	0	0	0	0	0	0	0	0	0	0	0	0	0	0	0	1	0	0	0	0	0	0	0	0	0
Endogenous melatonin deficiency aggravates high temperature-induced oxidative stress in Solanum lycopersicum L.	Ahammed, Golam Jalal; Xu, Wen; Liu, Airong; Chen, Shuangchen	Melatonin is a natural biostimulating molecule that occurs in a number of plant species. Despite a short history of phytomelatonin research, the critical roles of melatonin in plant stress responses have extensively been documented. However, the majority of such studies constitute 'pharmacological approach' and studies exploring the relevance of endogenous melatonin are scanty. As an attempt to u…	ENVIRONMENTAL AND EXPERIMENTAL BOTANY	2019	10.1016/j.envexpbot.2018.06.006	Ahammed, Golam Jalal	Chen, Shuangchen	4	0	0	0	1	1	0	0	0	0	0	0	0	0	0	0	0	0	0	0	0	0	0	0	1	0	0	1	0	0	0	0	0	0	0	0	0	0	0	0	0	0
Low melatonin production by suppression of either serotonin N-acetyltransferase or N-acetylserotonin methyltransferase in rice causes seedling growth retardation with yield penalty, abiotic stress susceptibility, and enhanced coleoptile growth under anoxic conditions	Byeon, Yeong; Back, Kyoungwhan	Serotonin N-acetyltransferase (SNAT) and N-acetylserotonin methyltransferase (ASMT) are the last two key enzymes for melatonin biosynthesis in living organisms. In this study, we demonstrated that transgenic rice (Oryza sativa L.) plants, in which expression of either endogenous SNAT or ASMT was suppressed, had reduced melatonin synthesis, confirming that both SNAT and ASMT are functionally invol…	JOURNAL OF PINEAL RESEARCH	2016	10.1111/jpi.12317	Byeon, Yeong	Back, Kyoungwhan	2	0	1	1	1	1	1	0	0	0	0	0	0	0	0	0	0	0	0	0	0	0	0	0	0	0	0	0	0	0	0	0	0	0	0	0	0	0	1	0	0	0
Glutathione-dependent induction of local and systemic defense against oxidative stress by exogenous melatonin in cucumber (Cucumis sativus L.)	Li, Hao; He, Jie; Yang, Xiaozhen; Li, Xin; Luo, Dan; Wei, Chunhua; Ma, Jianxiang; Zhang, Yong; Yang, Jianqiang; Zhang, Xian	Melatonin is involved in defending against oxidative stress caused by various environmental stresses in plants. In this study, the roles of exogenous melatonin in regulating local and systemic defense against photooxidative stress in cucumber (Cucumis sativus) and the involvement of redox signaling were examined. Foliar or rhizospheric treatment with melatonin enhanced tolerance to photooxidative…	JOURNAL OF PINEAL RESEARCH	2016	10.1111/jpi.12304	Li, Hao	Zhang, Xian	10	0	1	1	1	0	0	0	0	0	0	0	0	0	0	0	0	0	0	0	0	0	0	0	0	0	1	0	0	0	0	0	0	0	0	0	0	0	0	0	0	0
Melatonin-mediated nitric oxide improves tolerance to cadmium toxicity by reducing oxidative stress in wheat plants	Kaya, Cengiz; Okant, Mustafa; Ugurlar, Ferhat; Alyemeni, Mohammed Nasser; Ashraf, Muhammad; Ahmad, Parvaiz	Two independent trials were conducted to examine the involvement of nitric oxide (NO) in MT-mediated tolerance to Cd toxicity in wheat plants. Cadmium toxicity considerably led to a decrease in plant growth, total chlorophyll, PSII maximum efficiency (Fv/Fm), leaf water potential, potassium (K+) and calcium (Ca2+). Simultaneously, it caused an increase in levels of leaf malondialdehyde (MDA), hyd…	CHEMOSPHERE	2019	10.1016/j.chemosphere.2019.03.026	Kaya, Cengiz	Ahmad, Parvaiz	6	0	0	0	0	1	0	0	0	0	0	0	0	0	0	0	0	0	0	0	0	0	0	0	0	0	1	1	1	0	0	0	0	0	1	0	0	0	0	0	0	0
Kinetic analysis of purified recombinant rice N-acetylserotonin methyltransferase and peak melatonin production in etiolated rice shoots	Park, Sangkyu; Byeon, Yeong; Kim, Young-Soon; Back, Kyoungwhan	Rice (Oryza sativa) N-acetylserotonin methyltransferase (osASMT), the last enzyme in the synthesis of melatonin, was expressed in Escherichia coli and purified. We then characterized its enzyme kinetics, which is the first time this has been performed in plants. Purified glutathione S-transferase (GST)-fused recombinant osASMT (GST-osASMT) and GST-free osASMT showed specific enzyme activities of …	JOURNAL OF PINEAL RESEARCH	2013	10.1111/j.1600-079X.2012.01019.x	Park, Sangkyu	Back, Kyoungwhan	4	0	0	0	0	1	0	0	0	0	0	0	0	0	0	0	0	0	0	0	0	0	0	0	0	0	0	0	0	0	0	0	1	0	0	0	0	0	0	0	0	0
RAV transcription factors are essential for disease resistance against cassava bacterial blight via activation of melatonin biosynthesis genes	Wei, Yunxie; Chang, Yanli; Zeng, Hongqiu; Liu, Guoyin; He, Chaozu; Shi, Haitao	With 1 AP2 domain and 1 B3 domain, 7 MeRAVs in apetala2/ethylene response factor (AP2/ERF) gene family have been identified in cassava. However, the in vivo roles of these remain unknown. Gene expression assays showed that the transcripts of MeRAVs were commonly regulated after Xanthomonas axonopodis pv manihotis (Xam) and MeRAVs were specifically located in plant cell nuclei. Through virus-induc…	JOURNAL OF PINEAL RESEARCH	2018	10.1111/jpi.12454	Wei, Yunxie	Shi, Haitao	6	0	0	0	0	1	0	0	0	0	0	0	0	0	0	0	0	0	0	0	0	0	0	0	0	0	0	0	0	0	0	0	1	0	0	0	0	0	0	0	0	0
Exogenous melatonin ameliorates cold-induced damage in tomato plants	Ding, Fei; Liu, Bin; Zhang, Shuoxin	Low temperature is an adverse environmental factor posing damage to tomato plants and causing huge loss of yields. Thus, seeking an effective way of ameliorating cold damage is important for sustainable tomato production. Melatonin is a crucial molecule involved in plant abiotic stress responses. In this study, we investigated the role of exogenous melatonin in amelioration of cold damage in toma…	SCIENTIA HORTICULTURAE	2017	10.1016/j.scienta.2017.03.029	Ding, Fei	Zhang, Shuoxin	3	0	1	1	1	0	0	0	0	0	0	0	0	0	0	0	0	0	0	0	0	0	0	0	1	1	0	1	0	0	0	0	0	0	0	0	0	0	0	0	0	0
Proteomic analysis reveals a role of melatonin in promoting cucumber seed germination under high salinity by regulating energy production	Zhang, Na; Zhang, Hai-Jun; Sun, Qian-Qian; Cao, Yun-Yun; Li, Xingsheng; Zhao, Bing; Wu, Ping; Guo, Yang-Dong	Seed germination is a critical and complex process in the plant life cycle. Although previous studies have found that melatonin can promote seed germination under salt stress, the involvement of melatonin in the regulation of proteomic changes remains poorly understood. In this study, a total of 157 proteins were significantly influenced (ratio >= 2 or <= -2) by melatonin during seed germination …	SCIENTIFIC REPORTS	2017	10.1038/s41598-017-00566-1	Zhang, Na	Guo, Yang-Dong	8	0	1	1	0	0	0	0	0	0	0	0	0	0	0	0	0	0	0	0	0	0	0	1	0	0	0	0	0	0	0	0	0	0	0	0	0	0	0	0	0	0
Exogenous melatonin improved potassium content in Malus under different stress conditions	Li, Chao; Liang, Bowen; Chang, Cong; Wei, Zhiwei; Zhou, Shasha; Ma, Fengwang	Melatonin mediates many physiological processes in plants. We investigated its role in regulating growth, potassium uptake, and root system architecture under three types of stress: salinity or a deficiency of all nutrients in Malus hupehensis Rehd., as well as a K deficiency in Malus rockii Rehd. Each treatment caused a reduction in growth rates and disrupted the absorption of potassium. However…	JOURNAL OF PINEAL RESEARCH	2016	10.1111/jpi.12342	Li, Chao	Ma, Fengwang	6	0	0	0	1	0	0	0	0	0	0	0	0	0	0	0	0	0	0	0	0	0	0	0	1	1	1	0	0	0	0	0	0	0	0	0	0	0	0	0	0	0
Melatonin in Arabidopsis thaliana acts as plant growth regulator at low concentrations and preserves seed viability at high concentrations	Gatica Hernandez, Ismael; Vicente Gomez, Federico Jose; Cerutti, Soledad; Veronica Arana, Maria; Fernanda Silva, Maria	Since the discovery of melatonin in plants, several roles have been described for different species, organs, and developmental stages. Arabidopsis thaliana, being a model plant species, is adequate to contribute to the elucidation of the role of melatonin in plants. In this work, melatonin was monitored daily by UHPLC-MS/MS in leaves, in order to study its diurnal accumulation as well as the effe…	PLANT PHYSIOLOGY AND BIOCHEMISTRY	2015	10.1016/j.plaphy.2015.06.011	Gatica Hernandez, Ismael	Fernanda Silva, Maria	5	0	1	1	1	0	0	0	0	0	0	0	0	0	0	0	0	0	0	0	0	0	0	0	0	0	0	0	0	0	1	0	1	0	0	0	0	0	1	0	0	0
Melatonin enhances the occurrence of autophagy induced by oxidative stress in Arabidopsis seedlings	Wang, Ping; Sun, Xun; Wang, Na; Tan, Dun-Xian; Ma, Fengwang	The beneficial effect that melatonin has against mitochondrial dysfunctioning seems to be linked to mitophagy. Roles for melatonin have been demonstrated in promoting health and preventing disease, as well as activating the process of autophagy in general. However, no reports have been made about how the application of melatonin regulates that process when plants are exposed to oxidative stress. …	JOURNAL OF PINEAL RESEARCH	2015	10.1111/jpi.12233	Wang, Ping	Ma, Fengwang	5	0	1	1	1	0	0	0	0	0	0	0	0	0	0	0	0	0	0	0	0	0	0	0	1	1	1	0	0	0	0	0	0	0	0	0	0	0	0	0	0	0
Sodic alkaline stress mitigation with exogenous melatonin involves reactive oxygen metabolism and ion homeostasis in tomato	Liu, Na; Jin, Zhiyong; Wang, Shuoshuo; Gong, Biao; Wen, Dan; Wang, Xiufeng; Wei, Min; Shi, Qinghua	Melatonin, as an indoleamine molecule, is involved in multiple physiological processes in plants. In this study, the effects of exogenous melatonin on plant growth, reactive oxygen metabolism and ion homeo-stasis in alkaline-treated tomato seedlings were investigated. Alkaline stress caused much lower level in maximum photochemistry efficiency of PSII (Fv/Fm), chlorophyll content, the activity of…	SCIENTIA HORTICULTURAE	2015	10.1016/j.scienta.2014.10.049	Liu, Na	Shi, Qinghua	8	0	1	1	1	0	0	0	0	0	0	0	0	0	0	0	0	0	0	0	0	0	0	1	1	1	0	0	0	0	0	0	0	0	1	0	0	0	0	0	0	0
Melatonin Inhibits Cadmium Translocation and Enhances Plant Tolerance by Regulating Sulfur Uptake and Assimilation in Solanum lycopersicum L.	Hasan, Md Kamrul; Ahammed, Golam Jalal; Sun, Shuchang; Li, Mengqi; Yin, Hanqin; Zhou, Jie	Sulfur (5) metabolism plays a vital role in Cd detoxification, but the collaboration between melatonin biosynthesis and S metabolism under Cd stress remains unaddressed. Using exogenous melatonin, melatonin-deficient tomato plants with a silenced caffeic acid O-methyltransferase (COMT) gene, and COMT-overexpressing plants with cosuppression of sulfate transporter (SUT)1 and SUT2 genes, we found t…	JOURNAL OF AGRICULTURAL AND FOOD CHEMISTRY	2019	10.1021/acs.jafc.9b02404	Hasan, Md Kamrul	Zhou, Jie	6	0	0	0	1	0	0	0	0	0	0	0	0	0	0	0	0	0	0	0	0	0	0	1	0	0	0	0	0	0	0	0	0	0	0	0	0	0	0	0	0	0
Nitric Oxide Is Required for Melatonin-Enhanced Tolerance against Salinity Stress in Rapeseed (Brassica napus L.) Seedlings	Zhao, Gan; Zhao, Yingying; Yu, Xiuli; Kiprotich, Felix; Han, Han; Guan, Rongzhan; Wang, Ren; Shen, Wenbiao	Although melatonin (N-acetyl-5-methoxytryptamine) could alleviate salinity stress in plants, the downstream signaling pathway is still not fully characterized. Here, we report that endogenous melatonin and thereafter nitric oxide (NO) accumulation was successively increased in NaCl-stressed rapeseed (Brassica napus L.) seedling roots. Application of melatonin and NO-releasing compound not only co…	INTERNATIONAL JOURNAL OF MOLECULAR SCIENCES	2018	10.3390/ijms19071912	Zhao, Gan	Shen, Wenbiao	8	0	0	0	0	1	0	0	0	0	0	0	0	0	0	0	0	0	0	0	0	0	0	0	1	1	0	0	0	0	0	0	0	0	0	0	0	0	0	0	0	0
Melatonin limited ethylene production, softening and reduced physiology disorder in pear (&ITPyrus communis&IT L.) fruit during senescence	Zhai, Rui; Liu, Jianlong; Liu, Fengxia; Zhao, Yingxiao; Liu, Lulu; Fang, Chen; Wang, Huibin; Li, Xieyu; Wang, Zhigang; Ma, Fengwang; Xu, Lingfei	Some pear (Pyrus communis L.) fruit show a certain resistance to ripening. Thus, postharvest cold storage is commonly used to accelerate their ripening process by promoting ethylene production. However, the enhanced ethylene biosynthesis also accelerates pear fruit senescence. Here, the effects of melatonin on the senescence process in pear fruit was investigated. In a rapidly softening pear 'Sta…	POSTHARVEST BIOLOGY AND TECHNOLOGY	2018	10.1016/j.postharvbio.2018.01.017	Zhai, Rui	Xu, Lingfei	11	0	0	0	0	0	0	0	0	0	0	0	0	0	0	0	0	0	0	0	0	0	0	0	1	0	0	0	0	0	0	1	0	0	0	0	0	0	1	0	0	0
Melatonin Mitigates Salt Stress in Wheat Seedlings by Modulating Polyamine Metabolism	Ke, Qingbo; Ye, Jun; Wang, Bomei; Ren, Jianhong; Yin, Lina; Deng, Xiping; Wang, Shiwen	Melatonin, a small molecular weight indoleamine molecule, is involved in various biological processes and responses to environmental cues in plants. However, its function in abiotic stress response and the underlying mechanisms is less clear. In this study, we investigated the effect of melatonin on wheat seedlings growth under salt stress condition. Exogenous melatonin pretreatment partially mit…	FRONTIERS IN PLANT SCIENCE	2018	10.3389/fpls.2018.00914	Ke, Qingbo	Wang, Shiwen	7	0	0	0	1	1	0	0	0	0	0	0	0	0	0	0	0	0	0	0	0	0	0	1	0	0	1	0	0	0	0	0	0	0	1	0	0	0	0	0	0	0
Molecular cloning of melatonin 2-hydroxylase responsible for 2-hydroxymelatonin production in rice (Oryza sativa)	Byeon, Yeong; Back, Kyoungwhan	Although melatonin biosynthetic genes from plants have been cloned, the melatonin catabolism mechanisms remain unclear. To clone the genes responsible for melatonin metabolism, we ectopically expressed 35 full-length cDNAs of rice 2-oxoglutarate-dependent dioxygenase (2-ODD) in Escherichia coli and purified the corresponding recombinant proteins. In vitro 2-ODD assays showed four independent 2-OD…	JOURNAL OF PINEAL RESEARCH	2015	10.1111/jpi.12220	Byeon, Yeong	Back, Kyoungwhan	2	0	1	1	0	0	0	1	0	1	0	0	0	0	0	0	0	0	0	0	0	0	0	1	0	0	0	0	0	0	0	0	0	0	0	0	0	0	0	0	0	0
High levels of melatonin generated during the brewing process	Garcia-Moreno, H.; Calvo, J. R.; Maldonado, M. D.	Beer is a beverage consumed worldwide. It is produced from cereals (barley or wheat) and contains a wide array of bioactive phytochemicals and nutraceutical compounds. Specifically, high melatonin concentrations have been found in beer. Beers with high alcohol content are those that present the greatest concentrations of melatonin and vice versa. In this study, gel filtration chromatography and E…	JOURNAL OF PINEAL RESEARCH	2013	10.1111/jpi.12005	Garcia-Moreno, H.	Maldonado, M. D.	3	0	1	1	0	0	0	0	0	0	0	0	0	0	0	0	0	0	0	0	0	0	0	0	0	0	0	0	0	0	0	0	0	0	0	0	0	0	0	0	0	0
Comparative Physiological and Transcriptomic Analyses Reveal the Actions of Melatonin in the Delay of Postharvest Physiological Deterioration of Cassava	Hu, Wei; Kong, Hua; Guo, Yunling; Zhang, Yuliang; Ding, Zehong; Tie, Weiwei; Yan, Yan; Huang, Qixing; Peng, Ming; Shi, Haitao; Guo, Anping	Melatonin plays important roles in various aspects of biological processes. However, it is less known on the effects and mechanism of melatonin on the postharvest physiological deterioration (PPD) process of cassava, which largely restricts the potential of cassava as a food and industrial crop. In this study, we found that exogenous application of melatonin significantly delayed PPD of cassava t…	FRONTIERS IN PLANT SCIENCE	2016	10.3389/fpls.2016.00736	Hu, Wei	Guo, Anping	11	0	1	1	1	0	0	0	0	0	0	0	0	0	0	0	0	0	0	0	0	0	0	1	1	1	0	0	0	0	0	0	0	0	0	0	0	0	0	0	0	0
Sodic alkaline stress mitigation by exogenous melatonin in tomato needs nitric oxide as a downstream signal	Liu, Na; Gong, Biao; Jin, Zhiyong; Wang, Xiufeng; Wei, Min; Yang, Fengjuan; Li, Yan; Shi, Qinghua	The present study was designed to determine the interactive effect of exogenous melatonin and nitric oxide (NO) on sodic alkaline stress mitigation in tomato seedlings. It was observed that exogenous melatonin treatment elevated NO levels in alkaline-stressed tomato roots. However, exogenous NO had little effects on melatonin levels. Importantly, melatonin-induced NO generation was accompanied by…	JOURNAL OF PLANT PHYSIOLOGY	2015	10.1016/j.jplph.2015.07.012	Liu, Na	Shi, Qinghua	8	0	0	0	1	0	0	0	0	0	0	0	0	0	0	0	0	0	0	0	0	0	0	0	0	0	0	0	0	0	0	0	0	0	0	0	0	0	0	0	0	0
Exogenous Melatonin Application Delays Senescence of Kiwifruit Leaves by Regulating the Antioxidant Capacity and Biosynthesis of Flavonoids	Liang, Dong; Shen, Yanqiu; Ni, Zhiyou; Wang, Qin; Lei, Zhi; Xu, Nengqin; Deng, Qunxian; Lin, Lijin; Wang, Jin; Lv, Xiulan; Xia, Hui	Melatonin, a multiple signal molecule, plays important roles in delaying senescence during the development of plants. Because few species have been studied for the effect of exogenous melatonin on anti-aging, the plausible mechanism of melatonin of anti-aging effects on other plant species has remained largely unknown. In the present study, the effects of exogenous melatonin on leaf senescence in…	FRONTIERS IN PLANT SCIENCE	2018	10.3389/fpls.2018.00426	Liang, Dong	Xia, Hui	11	0	0	0	1	0	0	0	0	0	0	0	0	0	0	0	0	0	0	0	0	0	0	0	1	0	1	0	1	0	0	1	0	0	1	0	0	1	1	0	0	0
Melatonin and nitric oxide modulate glutathione content and glutathione reductase activity in sunflower seedling cotyledons accompanying salt stress	Kaur, Harmeet; Bhatla, Satish C.	The present findings demonstrate significant modulation of total glutathione content, reduced glutathione (GSH) content, oxidized glutathione (GSSG) content, GSH/GSSG ratio and glutathione reductase (GR; EC 1.6.4.2) activity in dark-grown seedling cotyledons in response to salt-stress (120 mM NaCl) in sunflower (Helianthus annuus L) seedlings. A differential spatial distribution of GR activity (m…	NITRIC OXIDE-BIOLOGY AND CHEMISTRY	2016	10.1016/j.niox.2016.07.001	Kaur, Harmeet	Bhatla, Satish C.	2	0	0	0	0	0	0	0	0	0	0	0	0	0	0	0	0	0	0	0	0	0	0	0	0	1	0	0	0	0	0	0	1	0	0	0	0	0	0	0	0	0
Predominance of 2-hydroxymelatonin over melatonin in plants	Byeon, Yeong; Tan, Dun-Xian; Reiter, Russel J.; Back, Kyoungwhan	The cloning of the gene encoding melatonin 2-hydroxylase (M2H), which is responsible for the synthesis of 2-hydroxymelatonin, has expanded the study of melatonin metabolism in plants. Kinetic analysis of M2H enzymatic activity demonstrated that the catalytic efficiency of M2H is much higher than those of other melatonin biosynthetic enzymes such as serotonin N-acetyltransferase (SNAT) and N-acety…	JOURNAL OF PINEAL RESEARCH	2015	10.1111/jpi.12274	Byeon, Yeong	Back, Kyoungwhan	4	1	1	1	0	0	0	1	0	1	1	1	0	0	0	0	0	0	0	0	0	0	0	1	0	0	0	0	0	0	0	0	0	0	0	0	0	0	0	0	0	0
Yeast contribution to melatonin, melatonin isomers and tryptophan ethyl ester during alcoholic fermentation of grape musts	Vigentini, Ileana; Gardana, Claudio; Fracassetti, Daniela; Gabrielli, Mario; Foschino, Roberto; Simonetti, Paolo; Tirelli, Antonio; Iriti, Marcello	Melatonin (MEL) has been found in some medicinal and food plants, including grapevine, a commodity of particular interest for the production of wine, a beverage of economic relevance. It has also been suggested that MEL in wine may, at least in part, contribute to the health-promoting properties attributed to this beverage and, possibly, to other traditional Mediterranean foodstuffs. After a prel…	JOURNAL OF PINEAL RESEARCH	2015	10.1111/jpi.12223	Vigentini, Ileana	Iriti, Marcello	8	0	0	0	0	0	0	0	0	0	0	0	0	0	0	0	0	0	0	0	0	0	0	0	0	0	0	0	0	0	0	0	0	0	0	0	0	0	0	0	0	0
Melatonin content of pepper and tomato fruits: Effects of cultivar and solar radiation	Riga, Patrick; Medina, Sonia; Garcia-Flores, Libia Alejandra; Gil-Izquierdo, Angel	We evaluated the effect of cultivar and solar radiation on the melatonin content of Capsicum annuum (pepper) and Solanum lycopersicum (tomato) fruits. The melatonin content of red pepper fruits ranged from 31 to 93 ng g(-1) (dry weight). The melatonin content of tomato ranged from 7.5 to 250 ng g(-1) (dry weight). We also studied the effect of ripeness on melatonin content and identified one grou…	FOOD CHEMISTRY	2014	10.1016/j.foodchem.2014.01.117	Riga, Patrick	Gil-Izquierdo, Angel	4	0	1	0	0	0	0	0	0	0	0	0	0	0	0	0	0	0	0	0	0	0	0	0	0	0	0	0	0	0	0	0	0	0	0	0	0	0	0	0	0	0
Alcoholic fermentation induces melatonin synthesis in orange juice	Fernandez-Pachon, M. S.; Medina, S.; Herrero-Martin, G.; Cerrillo, I.; Berna, G.; Escudero-Lopez, B.; Ferreres, F.; Martin, F.; Garcia-Parrilla, M. C.; Gil-Izquierdo, A.	Melatonin (N-acetyl-5-methoxytryptamine) is a molecule implicated in multiple biological functions. Its level decreases with age, and the intake of foods rich in melatonin has been considered an exogenous source of this important agent. Orange is a natural source of melatonin. Melatonin synthesis occurs during alcoholic fermentation of grapes, malt and pomegranate. The amino acid tryptophan is th…	JOURNAL OF PINEAL RESEARCH	2014	10.1111/jpi.12093	Fernandez-Pachon, M. S.	Gil-Izquierdo, A.	10	0	0	1	1	0	0	0	0	0	0	0	0	0	0	0	0	0	0	0	0	0	0	0	0	0	0	0	0	0	0	0	0	0	0	0	0	0	0	0	0	0
Comparisons of Scutellaria baicalensis, Scutellaria lateriflora and Scutellaria racemosa: Genome size, antioxidant potential and phytochemistry	Cole, Ian B.; Cao, Jin; Alan, Ali R.; Saxena, Praveen K.; Murch, Susan J.	The genus Scutellaria in the family Lamiaceae has over 350 species, many of which are medicinally active. One species, Scutellaria baicalensis, is one of the most widely prescribed plants in Traditional Chinese Medicine, used for neurological disorders, cancer and inflammatory diseases and has been the subject of detailed scientific study but little is known about the phytochemistry of other Scut…	PLANTA MEDICA	2008	10.1055/s-2008-1034358	Cole, Ian B.	Murch, Susan J.	5	1	0	0	0	0	0	0	0	0	0	0	0	0	0	0	0	0	0	0	0	0	0	1	1	0	0	0	0	0	0	0	0	0	0	0	0	0	0	0	0	0
Melatonin contents in mulberry (Morus spp.) leaves: Effects of sample preparation, cultivar, leaf age and tea processing	Pothinuch, P.; Tongchitpakdee, S.	The effects of sample preparation, cultivar, leaf age and tea processing on melatonin content of mulberry (Morus spp.) leaves were investigated. Sample preparation using ultrasonic technique in combination with solid phase extraction resulted in high recovery rate (76%), when compared to homogenisation in combination with liquid-liquid extraction procedure (12% recovery rate). The melatonin conte…	FOOD CHEMISTRY	2011	10.1016/j.foodchem.2011.03.045	Pothinuch, P.	Tongchitpakdee, S.	2	1	1	1	0	0	0	0	0	0	0	0	0	0	0	0	0	0	0	0	0	0	0	0	0	0	0	0	0	0	0	0	0	0	0	0	0	0	0	0	0	0
Melatonin Attenuates Potato Late Blight by Disrupting Cell Growth, Stress Tolerance, Fungicide Susceptibility and Homeostasis of Gene Expression in Phytophthora infestans	Zhang, Shumin; Zheng, Xianzhe; Reiter, Russel J.; Feng, Shun; Wang, Ying; Liu, Sen; Jin, Liang; Li, Zhengguo; Datla, Raju; Ren, Maozhi	Phytophthora infestans (P. infestans) is the causal agent of potato late blight, which caused the devastating Irish Potato Famine during 1845-1852. Until now, potato late blight is still the most serious threat to potato growth and has caused significant economic losses worldwide. Melatonin can induce plant innate immunity against pathogen infection, but the direct effects of melatonin on plant p…	FRONTIERS IN PLANT SCIENCE	2017	10.3389/fpls.2017.01993	Zhang, Shumin	Ren, Maozhi	10	0	0	0	1	0	0	0	0	0	0	0	0	0	0	0	0	0	0	0	0	0	0	0	0	0	0	0	0	0	0	0	1	0	0	0	0	0	0	0	0	0
De Novo Sequencing of Hypericum perforatum Transcriptome to Identify Potential Genes Involved in the Biosynthesis of Active Metabolites	He, Miao; Wang, Ying; Hua, Wenping; Zhang, Yuan; Wang, Zhezhi	Background: Hypericum perforatum L. (St. John's wort) is a medicinal plant with pharmacological properties that are antidepressant, anti-inflammatory, antiviral, anti-cancer, and antibacterial. Its major active metabolites are hypericins, hyperforins, and melatonin. However, little genetic information is available for this species, especially that concerning the biosynthetic pathways for active i…	PLOS ONE	2012	10.1371/journal.pone.0042081	He, Miao	Wang, Zhezhi	5	0	0	0	0	0	0	0	0	0	0	0	0	0	0	0	0	0	0	0	0	0	0	1	0	0	0	0	0	0	0	0	0	0	0	0	0	0	0	0	0	0
Long-term exogenous application of melatonin improves nutrient uptake fluxes in apple plants under moderate drought stress	Liang, Bowen; Ma, Changqing; Zhang, Zhijun; Wei, Zhiwei; Gao, Tengteng; Zhao, Qi; Ma, Fengwang; Li, Chao	To examine the potential roles of melatonin in nutrient uptake, we investigated the influence of its long-term exogenous application on `Naganofuji No.2' apple (Mains domestica Borkh.) under moderate drought conditions. Both growth and the uptake of macro-and micronutrients were generally decreased in stressed plants. However, the application of exogenous melatonin significantly mitigated this gr…	ENVIRONMENTAL AND EXPERIMENTAL BOTANY	2018	10.1016/j.envexpbot.2018.08.016	Liang, Bowen	Li, Chao	8	0	1	1	1	1	0	0	0	0	0	0	0	0	0	0	0	0	0	0	0	0	0	1	0	0	1	0	0	0	0	0	0	0	1	0	0	0	0	0	0	0
Exogenous Melatonin Alleviates Alkaline Stress in Malus hupehensis Rehd. by Regulating the Biosynthesis of Polyamines	Gong, Xiaoqing; Shi, Shuting; Dou, Fangfang; Song, Yi; Ma, Fengwang	Since melatonin was identified in plants decades ago, much attention has been devoted to discovering its role in plant science. There is still a great deal to learn about the functional importance of melatonin, as well as its functional mode. In this paper, we examine the role of melatonin treatment in the response of Malus hupehensis Rehd. to alkaline conditions. Stressed seedlings showed chloro…	MOLECULES	2017	10.3390/molecules22091542	Gong, Xiaoqing	Ma, Fengwang	5	0	0	0	1	0	0	0	0	0	0	0	0	0	0	0	0	0	0	0	0	0	0	0	1	1	0	0	1	0	0	0	0	0	0	0	0	0	0	0	0	0
Hydrogen peroxide produced by NADPH oxidase: a novel downstream signaling pathway in melatonin-induced stress tolerance in Solanum lycopersicum	Gong, Biao; Yan, Yanyan; Wen, Dan; Shi, Qinghua	The beneficial effects of melatonin on abiotic stress have been demonstrated in several plants. However, little is known about the signal transduction pathway of melatonin involved in the plant stress response. Here, we manipulated the melatonin levels in tomato plants through a chemical approach. The roles of melatonin in stress tolerance were studied by assessing the symptoms, chlorophyll fluor…	PHYSIOLOGIA PLANTARUM	2017	10.1111/ppl.12581	Gong, Biao	Shi, Qinghua	4	0	1	0	0	0	0	0	0	0	0	0	0	0	0	0	0	0	0	0	0	0	0	0	0	1	1	0	0	0	0	0	0	0	1	0	0	0	0	0	0	0
2-Hydroxymelatonin promotes the resistance of rice plant to multiple simultaneous abiotic stresses (combined cold and drought)	Lee, Hye-Jung; Back, Kyoungwhan	We investigated the physiological roles of 2-hydroxymelatonin (2-OHMel) in rice seedlings. When they were challenged with simultaneous multiple abiotic stressors, such as a combination of cold and drought, those pretreated with 2-OHMel were resistant, whereas no tolerance was observed in seedlings treated with either melatonin or water (control). The tolerance phenotype was associated with the in…	JOURNAL OF PINEAL RESEARCH	2016	10.1111/jpi.12347	Lee, Hye-Jung	Back, Kyoungwhan	2	0	0	0	0	0	1	1	0	1	0	0	0	0	0	0	0	0	0	0	0	0	0	0	0	0	0	0	0	0	0	0	1	0	0	0	0	0	0	0	0	0
Comparative photosynthetic and metabolic analyses reveal mechanism of improved cold stress tolerance in bermudagrass by exogenous melatonin	Hu, Zhengrong; Fan, Jibiao; Xie, Yan; Amombo, Erick; Liu, Ao; Gitau, Margaret Mukami; Khaldun, A. B. M.; Chen, Liang; Fu, Jinmin	Melatonin (N-acetyl-5-methoxytryptamine) has been reported to participate in plant development and abiotic stress responses. The main objective of this study was to investigate the role of melatonin in the cold-sensitive (S) and the cold-tolerant (T) bermudagrass genotypes' response to cold stress. The genotypes were treated with 100 mu M melatonin and exposed to 4 degrees C temperature for 3 day…	PLANT PHYSIOLOGY AND BIOCHEMISTRY	2016	10.1016/j.plaphy.2016.01.008	Hu, Zhengrong	Fu, Jinmin	9	0	1	1	1	1	0	0	0	0	0	0	0	0	0	0	0	0	0	0	0	0	0	0	1	0	0	0	0	0	0	0	1	0	0	0	0	0	0	0	0	0
Assessment of Different Sample Processing Procedures Applied to the Determination of Melatonin in Plants	Arnao, Marino B.; Hernandez-Ruiz, Josefa	Introduction - Melatonin, an indoleamine well known in vertebrates and structurally related to other important substances such as tryptophan or indole-3-acetic acid, is also present in the plant kingdom although its specific function(s) remain to be established. The emerging field of melatonin studies in plants has progressed very slowly, mainly due to the problems associated with melatonin quant…	PHYTOCHEMICAL ANALYSIS	2009	10.1002/pca.1083	Arnao, Marino B.	Hernandez-Ruiz, Josefa	2	0	1	1	0	0	0	0	0	0	0	0	0	0	0	0	0	0	0	0	0	0	0	0	0	0	0	0	0	0	0	0	0	0	0	0	0	0	0	0	0	0
Natural Variation in Banana Varieties Highlights the Role of Melatonin in Postharvest Ripening and Quality	Hu, Wei; Yang, Hai; Tie, Weiwei; Yan, Yan; Ding, Zehong; Liu, Yang; Wu, Chunlai; Wang, Jiashui; Reiter, Russel J.; Tan, Dun-Xian; Shi, Haitao; Xu, Biyu; Jin, Zhiqiang	This study aimed to investigate the role of melatonin in postharvest ripening and quality in various banana varieties with contrasting ripening periods. During the postharvest life, endogenous melatonin showed similar performance with ethylene in connection to ripening. In comparison to ethylene, melatonin was more correlated with postharvest banana ripening. Exogenous application of melatonin re…	JOURNAL OF AGRICULTURAL AND FOOD CHEMISTRY	2017	10.1021/acs.jafc.7b03354	Hu, Wei	Jin, Zhiqiang	13	0	1	1	1	1	0	0	0	0	0	0	0	0	0	0	0	0	0	0	0	0	0	0	0	0	0	0	0	0	0	0	1	0	0	0	0	0	0	0	0	0
Melatonin-induced CBF/DREB1s are essential for diurnal change of disease resistance and CCA1 expression in Arabidopsis	Shi, Haitao; Wei, Yunxie; He, Chaozu	Melatonin (N-acetyl-5-methoxytryptamine) is an important regulator of circadian rhythms and immunity in animals. However, the diurnal changes of endogenous melatonin and melatonin-mediated diurnal change of downstream responses remain unclear in Arabidopsis. Using the publicly available microarray data, we found that the transcript levels of two melatonin synthesis genes (serotonin N-acetyltransf…	PLANT PHYSIOLOGY AND BIOCHEMISTRY	2016	10.1016/j.plaphy.2016.01.018	Shi, Haitao	He, Chaozu	3	0	0	0	1	1	0	0	0	0	0	0	0	0	0	0	0	0	0	0	0	0	0	0	0	0	0	0	0	1	1	0	0	0	0	0	0	0	0	0	0	0
Melatonin and other factors that promote rooting and sprouting of shoot cuttings in Punica granatum cv. Wonderful	Sarrou, Eirini; Therios, Ioannis; Dimassi-Theriou, Kortessa	The agricultural and medicinal plant pomegranate (Punica granatum L. cv. Wonderful) was studied to examine the effects of wounding of cuttings and to test the effects of different concentrations of indole-3-butyric acid (IBA), gibberellic acid (GA(3)), hydrogen peroxide (H2O2), melatonin (MEL), and ascorbic acid (ASC) on rooting of the shoot cuttings under mist. The data indicated that IBA had a …	TURKISH JOURNAL OF BOTANY	2014	10.3906/bot-1302-55	Sarrou, Eirini	Dimassi-Theriou, Kortessa	3	0	0	0	0	0	0	0	0	0	0	0	0	0	0	0	0	0	0	0	0	0	0	0	0	0	1	0	0	0	0	0	0	0	0	0	0	0	0	0	1	0
The Structurally Related Auxin and Melatonin Tryptophan-Derivatives and their Roles in Arabidopsis thaliana and in the Human Malaria Parasite Plasmodium falciparum	Koyama, Fernanda C.; Carvalho, Thais L. G.; Alves, Eduardo; da Silva, Henrique B.; de Azevedo, Mauro F.; Hemerly, Adriana S.; Garcia, Celia R. S.	Indole compounds are involved in a range of functions in many organisms. In the human malaria parasite Plasmodium falciparum, melatonin and other tryptophan derivatives are able to modulate its intraerythrocytic cycle, increasing the schizont population as well as parasitemia, likely through ubiquitin-proteasome system (UPS) gene regulation. In plants, melatonin regulates root development, in a s…	JOURNAL OF EUKARYOTIC MICROBIOLOGY	2013	10.1111/jeu.12080	Koyama, Fernanda C.	Garcia, Celia R. S.	7	0	1	1	0	0	0	0	0	0	0	0	0	0	0	0	0	0	0	0	0	0	0	0	0	0	0	0	0	0	0	0	0	0	0	0	0	0	0	0	0	0
Transcriptional suppression of tryptamine 5-hydroxylase, a terminal serotonin biosynthetic gene, induces melatonin biosynthesis in rice (Oryza sativa L.)	Park, Sangkyu; Byeon, Yeong; Back, Kyoungwhan	Rice tryptamine 5-hydroxylase (T5H) is the second enzyme in melatonin biosynthesis, catalyzing tryptamine into serotonin. Transgenic rice plants, in which the expression of endogenous T5H was either overexpressed or repressed, were examined for alteration in melatonin biosynthesis. Unexpectedly, the overexpression genotypes showed reduced levels of melatonin, while the repression genotypes had el…	JOURNAL OF PINEAL RESEARCH	2013	10.1111/jpi.12053	Park, Sangkyu	Back, Kyoungwhan	3	0	0	0	0	1	1	0	0	0	0	0	0	0	0	0	0	0	0	0	0	0	0	0	0	0	0	0	0	0	0	0	0	0	0	0	0	0	0	0	0	0
Ozone sensitivity of currant tomato (Lycopersicon pimpinellifolium), a potential bioindicator species	Iriti, M; Belli, L; Nali, C; Lorenzini, G; Gerosa, G; Faoro, F	The wild tomato species Lycopersicon pimpinellifolium (currant tomato) was exposed to different O-3 concentration, both in controlled environment fumigation facilities and in open-top chambers, to assess its sensitivity and to verify its potential as a bioindicator plant. Plants appeared particularly sensitive to O-3 at an early stage of growth, responding with typical chlorotic spots within 24 h…	ENVIRONMENTAL POLLUTION	2006	10.1016/j.envpol.2005.08.046	Iriti, M	Faoro, F	6	0	1	0	0	0	0	0	0	0	0	0	0	0	0	0	0	0	0	0	0	0	0	0	0	1	1	0	0	0	0	0	0	0	0	0	0	0	0	0	0	0
Melatonin-Stimulated Triacylglycerol Breakdown and Energy Turnover under Salinity Stress Contributes to the Maintenance of Plasma Membrane H+-ATPase Activity and K+/Na+ Homeostasis in Sweet Potato	Yu, Yicheng; Wang, Aimin; Li, Xiang; Kou, Meng; Wang, Wenjun; Chen, Xianyang; Xu, Tao; Zhu, Mingku; Ma, Daifu; Li, Zongyun; Sun, Jian	Melatonin (MT) is a multifunctional molecule in animals and plants and is involved in defense against salinity stress in various plant species. In this study, MT pretreatment was simultaneously applied to the roots and leaves of sweet potato seedlings [Ipomoea batatas (L.) Lam.], which is an important food and industry crop worldwide, followed by treatment of 150 mM NaCl. The roles of MT in media…	FRONTIERS IN PLANT SCIENCE	2018	10.3389/fpls.2018.00256	Yu, Yicheng	Sun, Jian	11	0	1	1	1	0	0	0	0	0	0	0	0	0	0	0	0	0	0	0	0	0	0	1	0	0	0	0	0	0	0	0	0	0	0	0	0	0	0	0	0	0
Interactive effects of melatonin and cytokinin on alleviating drought-induced leaf senescence in creeping bentgrass (Agrostis stolonifera)	Ma, Xiqing; Zhang, Jing; Burgess, Patrick; Rossi, Stephanie; Huang, Bingru	Drought stress induces leaf senescence while cytokinins (CK) and melatonin (ME) play roles in regulating leaf senescence. The objectives of this study were to determine whether ME alone or interacting with CK could suppress drought-induced leaf senescence through mediating CK pathways and chlorophyll catabolism in creeping bentgrass (Agrostis stolonifera). Plants of wild type ('WT') (cv. 'Penncro…	ENVIRONMENTAL AND EXPERIMENTAL BOTANY	2018	10.1016/j.envexpbot.2017.10.010	Ma, Xiqing	Huang, Bingru	5	0	0	0	1	1	1	0	0	0	0	0	0	0	0	0	0	0	0	0	0	0	0	0	0	1	1	0	0	0	0	1	0	0	1	0	0	0	1	0	0	0
Melatonin and derived L-tryptophan metabolites produced during alcoholic fermentation by different wine yeast strains	Fernandez-Cruz, E.; Alvarez-Fernandez, M. A.; Valero, E.; Troncoso, A. M.; Garcia-Parrilla, M. C.	Melatonin is a neurohormone involved in the regulation of circadian rhythms in humans. Evidence has recently been found of its occurrence in wines and its role in the winemaking process. The yeast Saccharomyces cerevisiae is consequently thought to be important in Melatonin synthesis, but limited data and reference texts are available on this synthetic pathway. This paper aims to elucidate whethe…	FOOD CHEMISTRY	2017	10.1016/j.foodchem.2016.08.020	Fernandez-Cruz, E.	Garcia-Parrilla, M. C.	5	0	0	0	0	0	0	0	0	0	0	0	0	0	0	0	0	0	0	0	0	0	0	0	0	0	0	0	0	1	0	0	0	1	0	0	0	0	0	0	0	0
Beneficial Roles of Melatonin on Redox Regulation of Photosynthetic Electron Transport and Synthesis of D1 Protein in Tomato Seedlings under Salt Stress	Zhou, Xiaoting; Zhao, Hailiang; Cao, Kai; Hu, Lipan; Du, Tianhao; Baluska, Frantisek; Zou, Zhirong	Melatonin is important in the protection of plants suffering various forms of abiotic stress. The molecular mechanisms underlying the melatonin-mediated protection of their photosynthetic machinery are not completely resolved. This study investigates the effects of exogenous melatonin applications on salt-induced damage to the light reaction components of the photosynthetic machinery of tomato se…	FRONTIERS IN PLANT SCIENCE	2016	10.3389/fpls.2016.01823	Zhou, Xiaoting	Zou, Zhirong	7	0	0	0	1	0	0	0	0	0	0	0	0	0	0	0	0	0	0	0	0	0	0	0	0	1	0	0	0	0	0	0	1	0	0	0	0	0	0	0	0	0
Melatonin mediates the stabilization of DELLA proteins to repress the floral transition in Arabidopsis	Shi, Haitao; Wei, Yunxie; Wang, Qiannan; Reiter, Russel J.; He, Chaozu	Precise floral transition from vegetative growth phase to reproductive growth phase is very important in plant life cycle. In flowering genetic pathways, DELLA proteins are master transcriptional regulators of gibberelic acid (GA) pathway, and FLOWERING LOCUS C (FLC) is a core repressor of vernalization pathway as well as downstream of DELLAs. As a crucial messenger in plants, the possible involv…	JOURNAL OF PINEAL RESEARCH	2016	10.1111/jpi.12320	Shi, Haitao	He, Chaozu	5	0	1	1	1	1	0	0	0	0	0	0	0	0	0	0	0	0	0	0	0	0	0	0	0	0	0	0	0	0	0	0	0	0	0	0	0	0	0	0	0	0
Induction of serotonin biosynthesis is uncoupled from the coordinated induction of tryptophan biosynthesis in pepper fruits (Capsicum annuum) upon pathogen infection	Park, Sangkyu; Kang, Kiyoon; Lee, Kyungjin; Choi, Doil; Kim, Young-Soon; Back, Kyoungwhan	It has been suggested that serotonin biosynthesis is regulated by tryptophan decarboxylase (TDC) in plants. To determine if TDC plays a rate-limiting role in serotonin biosynthesis, two TDC genes, PepTDC1 and PepTDC2, were cloned from pepper (Capsicum annuum L.) fruits infected with anthracnose fungus and their expression was then examined in various organs, including fruit that had been treated …	PLANTA	2009	10.1007/s00425-009-1015-2	Park, Sangkyu	Back, Kyoungwhan	6	0	0	0	0	0	0	0	0	0	0	0	0	0	0	0	0	0	0	0	0	0	0	0	0	0	0	0	0	0	0	0	0	0	0	0	0	0	0	0	0	0
High-Throughput MicroRNA and mRNA Sequencing Reveals That MicroRNAs May Be Involved in Melatonin-Mediated Cold Tolerance in Citrullus lanatus L	Li, Hao; Dong, Yuchuan; Chang, Jingjing; He, Jie; Chen, Hejie; Liu, Qiyan; Wei, Chunhua; Ma, Jianxiang; Zhang, Yong; Yang, Jianqiang; Zhang, Xian	Transcriptional regulation of cold-responsive genes is crucial for exogenous melatonin mediated cold tolerance in plants. Nonetheless, how melatonin regulates cold responsive genes is largely unknown. In this study, we found that exogenous melatonin improved cold tolerance in watermelon by regulating expression of microRNAs (miRNAs). We identified a set of miRNAs that were regulated by melatonin …	FRONTIERS IN PLANT SCIENCE	2016	10.3389/fpls.2016.01231	Li, Hao	Zhang, Xian	11	0	1	1	1	0	0	0	0	0	0	0	0	0	0	0	0	0	0	0	0	0	0	0	0	0	0	0	0	0	0	0	0	0	0	0	0	0	0	0	0	0
Transient induction of melatonin biosynthesis in rice (Oryza sativa L.) during the reproductive stage	Park, Sangkyu; Tieu-Ngoc Nguyen Le; Byeon, Yeong; Kim, Young Soon; Back, Kyoungwhan	The regulation of reproduction-stage inducible melatonin biosynthesis in rice (Oryza sativa cv. Dongjin) was investigated. The flag leaf and panicle (flower) were collected from field-grown rice at three different reproductive stages: the preflowering stage, flowering stage, and postflowering stage. Melatonin synthesis was induced in the panicle, whereas no induction was observed in the flag leaf…	JOURNAL OF PINEAL RESEARCH	2013	10.1111/jpi.12021	Park, Sangkyu	Back, Kyoungwhan	5	0	1	1	0	0	0	0	0	0	0	0	0	0	0	0	0	0	0	0	0	0	0	0	0	0	0	0	0	0	0	0	0	0	0	0	0	0	0	0	0	0
Melatonin: A Multifunctional Molecule That Triggers Defense Responses against High Light and Nitrogen Starvation Stress in Haematococcus pluvialis	Ding, Wei; Zhao, Yongteng; Xu, Jun-Wei; Zhao, Peng; Li, Tao; Ma, Huixian; Reiter, Russel J.; Yu, Xuya	Melatonin (MLT), a ubiquitously distributed small molecule, functions in plant responses to various biotic and abiotic stresses. However, the interactions between melatonin and other important molecules in Haematococcus pluvialis response stresses are largely unknown. In the present study, exogenous melatonin improved H. pluvialis resistance to nitrogen starvation and high light. We concluded tha…	JOURNAL OF AGRICULTURAL AND FOOD CHEMISTRY	2018	10.1021/acs.jafc.8b02178	Ding, Wei	Yu, Xuya	8	0	0	0	1	0	0	0	0	0	0	0	0	0	0	0	0	0	0	0	0	0	0	0	1	1	0	0	0	0	0	0	1	1	0	0	0	0	0	0	0	0
Exogenous Melatonin Confers Cadmium Tolerance by Counterbalancing the Hydrogen Peroxide Homeostasis in Wheat Seedlings	Ni, Jun; Wang, Qiaojian; Shah, Faheem Afzal; Liu, Wenbo; Wang, Dongdong; Huang, Shengwei; Fu, Songling; Wu, Lifang	Melatonin has emerged as a research highlight regarding its important role in regulating plant growth and the adaptation to the environmental stresses. In this study, we investigated how melatonin prevented the cadmium toxicity to wheat seedlings. The results demonstrated that cadmium induced the expression of melatonin biosynthesis-related genes and cause a significant increase of endogenous mel…	MOLECULES	2018	10.3390/molecules23040799	Ni, Jun	Wu, Lifang	8	0	0	1	1	1	0	0	0	0	0	0	0	0	0	0	0	0	0	0	0	0	0	0	1	0	1	0	1	0	0	0	1	0	0	0	0	0	1	0	0	0
Exogenous Melatonin Improves Plant Iron Deficiency Tolerance via Increased Accumulation of Polyamine-Mediated Nitric Oxide	Zhou, Cheng; Liu, Zhi; Zhu, Lin; Ma, Zhongyou; Wang, Jianfei; Zhu, Jian	Melatonin has recently been demonstrated to play important roles in the regulation of plant growth, development, and abiotic and biotic stress responses. However, the possible involvement of melatonin in Fe deficiency responses and the underlying mechanisms remained elusive in Arabidopsis thaliana. In this study, Fe deficiency quickly induced melatonin synthesis in Arabidopsis plants. Exogenous m…	INTERNATIONAL JOURNAL OF MOLECULAR SCIENCES	2016	10.3390/ijms17111777	Zhou, Cheng	Zhu, Jian	6	0	0	0	1	0	0	0	0	0	0	0	0	0	0	0	0	0	0	0	0	0	0	0	0	1	0	0	0	0	0	0	0	0	0	0	0	0	0	0	0	0
Exogenous Melatonin Suppresses Dark-Induced Leaf Senescence by Activating the Superoxide Dismutase-Catalase Antioxidant Pathway and Down-Regulating Chlorophyll Degradation in Excised Leaves of Perennial Ryegrass (Lolium perenne L.)	Zhang, Jing; Li, Huibin; Xu, Bin; Li, Jing; Huang, Bingru	Leaf senescence is a typical symptom in plants exposed to dark and may be regulated by plant growth regulators. The objective of this study was to determine whether exogenous application of melatonin (N-acetyl-5-methoxytryptamine) suppresses dark induced leaf senescence and the effects of melatonin on reactive oxygen species (ROS) scavenging system and chlorophyll degradation pathway in perennial…	FRONTIERS IN PLANT SCIENCE	2016	10.3389/fpls.2016.01500	Zhang, Jing	Huang, Bingru	5	0	1	1	1	1	0	0	0	0	0	0	0	0	0	0	0	0	0	0	0	0	0	0	1	1	1	1	1	0	0	1	0	0	1	0	0	0	1	0	0	0
Chloroplast-encoded serotonin N-acetyltransferase in the red alga Pyropia yezoensis: gene transition to the nucleus from chloroplasts	Byeon, Yeong; Lee, Hyoung Yool; Choi, Dong-Woog; Back, Kyoungwhan	Melatonin biosynthesis involves the N-acetylation of arylalkylamines such as serotonin, which is catalysed by serotonin N-acetyltransferase (SNAT), the penultimate enzyme of melatonin biosynthesis in both animals and plants. Here, we report the functional characterization of a putative N-acetyltransferase gene in the chloroplast genome of the alga laver (Pyropia yezoensis, formerly known as Porph…	JOURNAL OF EXPERIMENTAL BOTANY	2015	10.1093/jxb/eru357	Byeon, Yeong	Back, Kyoungwhan	4	0	1	1	0	0	0	0	0	0	0	0	0	0	0	0	0	0	0	0	0	0	0	0	0	0	0	0	0	0	0	0	0	0	0	0	0	0	0	0	0	0
Analytical tools for elucidating the biological role of melatonin in plants by LC-MS/MS	Vicente Gomez, Federico Jose; Gatica Hernandez, Ismael; Dante Martinez, Luis; Fernanda Silva, Maria; Cerutti, Soledad	Melatonin (MT) presence in higher plants was recently discovered and the knowledge of its function in vivo is limited. Several studies have recently shown the occurrence of MT and related compounds in grapes and wines. The analysis of MT in plants and foods represents a highly challenging task due to its wide concentration range, the difficulty in the selection of the extraction solvents because …	ELECTROPHORESIS	2013	10.1002/elps.201200569	Vicente Gomez, Federico Jose	Cerutti, Soledad	5	0	1	1	0	0	0	0	0	0	0	0	0	0	0	0	0	0	0	0	0	0	0	0	0	0	0	0	0	0	0	0	0	0	0	0	0	0	0	0	0	0
Cadmium-induced melatonin synthesis in rice requires light, hydrogen peroxide, and nitric oxide: Key regulatory roles for tryptophan decarboxylase and caffeic acid O-methyltransferase	Lee, Kyungjin; Choi, Geun-Hee; Back, Kyoungwhan	In plants, melatonin production is induced by stimuli such as cold and drought, and cadmium (Cd) is the best elicitor of melatonin production in rice. However, the mechanism by which Cd induces melatonin synthesis in plants remains unknown. We challenged rice seedlings with Cd under different light conditions and found that continuous light produced the highest levels of melatonin, while continuo…	JOURNAL OF PINEAL RESEARCH	2017	10.1111/jpi.12441	Lee, Kyungjin	Back, Kyoungwhan	3	0	0	0	0	0	0	0	0	0	0	0	0	0	0	0	0	0	0	0	0	0	0	0	0	0	1	0	0	0	0	0	1	0	0	0	0	0	0	0	0	0
Melatonin Application to Pisum sativum L. Seeds Positively Influences the Function of the Photosynthetic Apparatus in Growing Seedlings during Paraquat-Induced Oxidative Stress	Szafranska, Katarzyna; Reiter, Russel J.; Posmyk, Malgorzata M.	Melatonin, due to its pleiotropic effects plays an important role improving tolerance to stresses. Plants increase endogenous melatonin synthesis when faced with harsh environments as well as exogenously applied melatonin limits stress injuries. Presented work demonstrated that single melatonin application into the seeds during pre-sowing priming improved oxidative stress tolerance of growing see…	FRONTIERS IN PLANT SCIENCE	2016	10.3389/fpls.2016.01663	Szafranska, Katarzyna	Posmyk, Malgorzata M.	3	0	0	0	1	1	0	0	0	0	0	0	0	0	0	0	0	0	0	0	0	0	0	0	0	1	0	0	0	0	0	0	1	0	1	1	0	0	0	0	0	0
The beneficial effects of exogenous melatonin on tomato fruit properties	Liu, Jianlong; Zhang, Ruimin; Sun, Yunkuo; Liu, Zeyu; Jin, Wen; Sun, Yan	As a highly conserved molecule evolutionarily,melatonin displays an exceptional multiplicity of actions in plants. Our study objective was to analyze how long-term applications of exogenous melatonin influence the quality and yield of fruit from 'ZheFen No. 701' tomato (Solanum lycopersicum). Plants that grew from seeds that had been soaked with melatonin prior to germination had much higher yiel…	SCIENTIA HORTICULTURAE	2016	10.1016/j.scienta.2016.05.003	Liu, Jianlong	Sun, Yan	6	0	1	1	1	0	0	0	0	0	0	0	0	0	0	0	0	0	0	0	0	0	0	0	0	0	0	0	0	0	0	0	0	0	0	0	0	0	0	0	0	0
Melatonin alleviates cold-induced oxidative damage in maize seedlings by up-regulating mineral elements and enhancing antioxidant activity	Turk, Hulya; Erdal, Serkan	Melatonin, known as an animal hormone and an antioxidant with a low molecular weight, is one of the most commonly used substances to improve plant resistance against various environmental stresses. However, there are no studies explaining the effects of melatonin on the relationship between defense system and mineral composition of plants under stressed and unstressed-conditions. The present stud…	JOURNAL OF PLANT NUTRITION AND SOIL SCIENCE	2015	10.1002/jpln.201400476	Turk, Hulya	Erdal, Serkan	2	0	1	1	0	0	0	0	0	0	0	0	0	0	0	0	0	0	0	0	0	0	0	0	1	0	1	1	1	0	0	0	0	0	1	0	0	0	0	0	0	0
Production of transgenic Nicotiana sylvestris plants expressing melatonin synthetase genes and their effect on UV-B-induced DNA damage	Zhang, LaiJun; Jia, JingFen; Xu, Yao; Wang, Yingli; Hao, JianGuo; Li, TianKe	We have obtained transgenic plants of Nicotiana sylvestris expressing an arylalkylamine N-acetyltransferase (AANAT) gene and a hydroxyindole-O-methyltransferase (HIOMT) gene using Agrobacterium tumefaciens-mediated transformation. Both AANAT and HIOMT are key enzymes in melatonin synthesis. Transgenic plants of N. sylvestris were characterized by polymerase chain reaction (PCR) and reverse transc…	IN VITRO CELLULAR & DEVELOPMENTAL BIOLOGY-PLANT	2012	10.1007/s11627-011-9413-0	Zhang, LaiJun	Li, TianKe	6	0	1	0	0	0	1	0	0	0	0	0	0	0	0	0	0	0	0	0	0	0	0	0	0	0	0	0	0	0	0	0	0	1	0	0	0	0	0	0	0	0
Transcriptomic profiling of tall fescue in response to heat stress and improved thermotolerance by melatonin and 24-epibrassinolide	Alam, Mohammad Nur; Zhang, Lihua; Yang, Li; Islam, Md. Rabiul; Liu, Yang; Luo, Hong; Yang, Pingfang; Wang, Qingfeng; Chan, Zhulong	Background: Tall fescue is a widely used cool season turfgrass and relatively sensitive to high temperature. Chemical compounds like melatonin (MT) and 24-epibrassinolide (EBL) have been reported to improve plant heat stress tolerance effectively. Results: In this study, we reported that MT and EBL pretreated tall fescue seedlings showed decreased reactive oxygen species (ROS), electrolyte leakag…	BMC GENOMICS	2018	10.1186/s12864-018-4588-y	Alam, Mohammad Nur	Chan, Zhulong	9	0	1	1	1	0	0	0	0	0	0	0	0	0	0	0	0	0	0	0	0	0	0	1	1	1	0	0	0	0	0	0	0	0	1	0	0	0	0	0	0	0
Melatonin Improves Heat Tolerance in Kiwifruit Seedlings through Promoting Antioxidant Enzymatic Activity and Glutathione S-Transferase Transcription	Liang, Dong; Gao, Fan; Ni, Zhiyou; Lin, Lijin; Deng, Qunxian; Tang, Yi; Wang, Xun; Luo, Xian; Xia, Hui	Evidence exists to suggest that melatonin (MT) is important to abiotic stress tolerance in plants. Here, we investigated whether exogenous MT reduces heat damage on biological parameters and gene expression in kiwifruit (Actinidia deliciosa) seedlings. Pretreatment with MT alleviates heat-induced oxidative harm through reducing H2O2 content and increasing proline content. Moreover, MT application…	MOLECULES	2018	10.3390/molecules23030584	Liang, Dong	Xia, Hui	9	0	0	0	1	0	0	0	0	0	0	0	0	0	0	0	0	0	0	0	0	0	0	0	1	0	1	0	1	0	0	0	0	0	0	0	0	0	0	0	0	0
Chloroplast overexpression of rice caffeic acid O-methyltransferase increases melatonin production in chloroplasts via the 5-methoxytryptamine pathway in transgenic rice plants	Choi, Geun-Hee; Lee, Hyoung Yool; Back, Kyoungwhan	Recent analyses of the enzymatic features of various melatonin biosynthetic genes from bacteria, animals, and plants have led to the hypothesis that melatonin could be synthesized via the 5-methoxytryptamine (5-MT) pathway. 5-MT is known to be synthesized in vitro from serotonin by the enzymatic action of -O-methyltransferases, including N-acetylserotonin methyltransferase (ASMT) and caffeic acid…	JOURNAL OF PINEAL RESEARCH	2017	10.1111/jpi.12412	Choi, Geun-Hee	Back, Kyoungwhan	3	0	0	0	0	0	1	0	0	0	0	0	0	0	0	0	0	0	0	0	1	0	0	0	0	0	0	0	0	0	0	0	1	0	0	0	0	0	1	0	0	0
The vertebrate pineal hormone melatonin is produced by the brown alga Pterygophora californica and mimics dark effects on growth rate in the light	Fuhrberg, B; Balzer, I; Hardeland, R; Werner, A; Luning, K	Melatonin, a methoxylated indoleamine, plays a role as a mediator of darkness in animals as well as in the unicellular alga Gonyaulax polyedra Stein and was recently detected in higher plants. We report on the first finding of melatonin in a multicellular alga, the brown alga Pterygophora californica Rupr. Melatonin was identified in juvenile sporophytes of P. californica by two independent metho…	PLANTA	1996		Fuhrberg, B	Luning, K	5	0	0	0	0	0	0	0	0	0	0	0	0	0	0	0	0	0	0	0	0	0	0	0	0	0	0	0	0	0	0	0	1	1	0	0	0	0	0	0	0	0
Hydrogen peroxide acts downstream of melatonin to induce lateral root formation	Chen, Ziping; Gu, Quan; Yu, Xiuli; Huang, Liqin; Xu, Sheng; Wang, Ren; Shen, Wei; Shen, Wenbiao	Background and Aims Although several studies have confirmed the beneficial roles of exogenous melatonin in lateral root (LR) formation, the molecular mechanism is still elusive. Here, the role of hydrogen peroxide (H2O2) in the induction of LR formation triggered by melatonin was investigated. Methods Alfalfa (Medicago sativa 'Biaogan') and transgenic Arabidopsis seedlings were treated with or wi…	ANNALS OF BOTANY	2018	10.1093/aob/mcx207	Chen, Ziping	Shen, Wenbiao	8	0	0	1	1	1	1	0	0	0	0	0	0	0	0	0	0	0	0	0	0	0	0	0	0	0	1	0	0	0	0	0	0	0	0	0	0	0	0	0	0	0
Melatonin treatment of pre-veraison grape berries to increase size and synchronicity of berries and modify wine aroma components	Meng, Jiang-Fei; Xu, Teng-Fei; Song, Chang-Zheng; Yu, Yong; Hu, Fan; Zhang, Li; Zhang, Zhen-Wen; Xi, Zhu-Mei	A comprehensive investigation was carried out to determine the effect of exogenous melatonin treatment of pre-veraison grapes on grape berries and its wines. Two melatonin treatments of pre-veraison grape berries increased the weight of the berries by approximately 6.6%. Meanwhile, this melatonin treatment could be beneficial in the reduction of underripe and overripe fruits and in enhancing the …	FOOD CHEMISTRY	2015	10.1016/j.foodchem.2015.03.140	Meng, Jiang-Fei	Xi, Zhu-Mei	8	0	0	0	1	0	0	0	0	0	0	0	0	0	0	0	0	0	0	0	0	0	0	0	0	0	0	0	0	0	0	0	0	0	0	0	0	0	0	0	0	0
Differential roles of melatonin in plant-host resistance and pathogen suppression in cucurbits	Mandal, Mihir Kumar; Suren, Haktan; Ward, Brian; Boroujerdi, Arezue; Kousik, Chandrasekar	Since the 1950s, research on the animal neurohormone, melatonin, has focused on its multiregulatory effect on patients suffering from insomnia, cancer, and Alzheimer's disease. In plants, melatonin plays major role in plant growth and development, and is inducible in response to diverse biotic and abiotic stresses. However, studies on the direct role of melatonin in disease suppression and as a s…	JOURNAL OF PINEAL RESEARCH	2018	10.1111/jpi.12505	Mandal, Mihir Kumar	Kousik, Chandrasekar	5	0	0	0	0	0	0	0	0	0	0	0	0	0	0	0	0	0	0	0	0	0	0	0	0	0	0	0	0	0	0	0	0	0	0	0	0	0	0	0	0	0
Effects of Melatonin on Antioxidant Capacity in Naked Oat Seedlings under Drought Stress	Gao, Wenying; Zhang, Yujing; Feng, Zheng; Bai, Qingqing; He, Jinjin; Wang, Yingjuan	Melatonin (N-acetyl-5-methoxytryptamine, MT) is a molecule with pleiotropic effects including antioxidant activity, regulated plant growth, development, and reduced environmental stress in plants. However, only a few studies have analyzed the effect of exogenous MT on drought stress in naked oat seedlings. Therefore, in this study, we studied the effects of exogenous MT on the antioxidant capacit…	MOLECULES	2018	10.3390/molecules23071580	Gao, Wenying	Wang, Yingjuan	6	0	1	1	1	0	0	0	0	0	0	0	0	0	0	0	0	0	0	0	0	0	0	0	1	1	1	0	1	0	0	0	0	0	0	0	0	0	0	0	0	0
Melatonin Improves Waterlogging Tolerance of Malus baccata (Linn.) Borkh. Seedlings by Maintaining Aerobic Respiration, Photosynthesis and ROS Migration	Zheng, Xiaodong; Zhou, Jingzhe; Tan, Dun-Xian; Wang, Na; Wang, Lin; Shan, Dongqian; Kong, Jin	Waterlogging, one of the notorious abiotic stressors, retards the growth of apple plants and reduces their production. Thus, it is an urgent agenda for scientists to identify the suitable remedies for this problem. In the current study, we found that melatonin significantly improved the tolerance of apple seedlings against waterlogging stress. This was indicated by the reduced chlorosis and wilti…	FRONTIERS IN PLANT SCIENCE	2017	10.3389/fpls.2017.00483	Zheng, Xiaodong	Kong, Jin	7	0	1	1	1	0	0	0	0	0	0	0	0	0	0	0	0	0	0	0	0	0	0	0	0	1	0	0	0	0	0	0	0	0	0	0	0	0	0	0	0	0
Apple autophagy-related protein MdATG3s afford tolerance to multiple abiotic stresses	Wang, Ping; Sun, Xun; Jia, Xin; Ma, Fengwang	The efficient degradation system of autophagy in plant cells has important roles in removing and recycling intracellular components during normal development or under environmental stresses. Formation of autophagosomes requires the conjugation of ubiquitin-like protein ATG8 to phosphatidylethanolamine (PE). We isolated two ubiquitin-conjugating enzyme E2 -like ATG3 homologues from Malus domestica…	PLANT SCIENCE	2017	10.1016/j.plantsci.2016.12.003	Wang, Ping	Ma, Fengwang	4	0	0	0	0	0	0	0	0	0	0	0	0	0	0	0	0	0	0	0	0	0	0	0	0	0	0	0	0	0	0	0	0	0	0	0	0	0	1	0	0	0
Improved cold tolerance in Elymus nutans by exogenous application of melatonin may involve ABA-dependent and ABA-independent pathways	Fu, Juanjuan; Wu, Ye; Miao, Yanjun; Xu, Yamei; Zhao, Enhua; Wang, Jin; Sun, Huaien; Liu, Qian; Xue, Yongwei; Xu, Yuefei; Hu, Tianming	Melatonin is an important secondary messenger that plays a central role in plant growth, as well as abiotic and biotic stress tolerance. However, the underlying physiological and molecular mechanisms of melatonin-mediated cold tolerance, especially interactions between melatonin and other key molecules in the plant stress response, remain unknown. Here, the interrelation between melatonin and abs…	SCIENTIFIC REPORTS	2017	10.1038/srep39865	Fu, Juanjuan	Hu, Tianming	11	0	0	0	1	1	0	0	0	0	0	0	0	0	0	0	0	0	0	0	0	0	0	0	1	1	0	0	0	0	0	0	0	0	0	0	0	0	0	1	0	0
Cloning and characterization of the serotonin N-acetyltransferase-2 gene (SNAT2) in rice (Oryza sativa)	Byeon, Yeong; Lee, Hyoung Yool; Back, Kyoungwhan	The penultimate enzyme in melatonin synthesis is serotonin N-acetyltransferase (SNAT), which exists as a single copy in mammals and plants. Our recent studies of the Arabidopsis snat-knockout mutant and SNATRNAi rice (Oryza sativa) plants predicted the presence of at least one other SNAT isogene in plants; that is, the snat-knockout mutant of Arabidopsis and the SNATRNAi rice plants still produce…	JOURNAL OF PINEAL RESEARCH	2016	10.1111/jpi.12339	Byeon, Yeong	Back, Kyoungwhan	3	0	0	0	0	0	1	0	0	0	0	0	0	0	0	0	0	0	0	0	0	0	0	0	0	1	0	0	0	0	0	0	0	0	0	0	0	0	0	0	0	0
Cloning and characterization of a serotonin N-acetyltransferase from a gymnosperm, loblolly pine (Pinus taeda)	Park, Sangkyu; Byeon, Yeong; Lee, Hyoung Yool; Kim, Young-Soon; Ahn, Taeho; Back, Kyoungwhan	Serotonin N-acetyltransferase (SNAT) is the penultimate enzyme in melatonin biosynthesis in both animals and plants. SNAT catalyzes serotonin into N-acetylserotonin, an immediate precursor for melatonin biosynthesis by N-acetylserotonin methyltransferase (ASMT). We cloned the SNAT gene from a gymnosperm loblolly pine (Pinus teada). The loblolly pine SNAT (PtSNAT) gene encodes 255 amino acids harb…	JOURNAL OF PINEAL RESEARCH	2014	10.1111/jpi.12174	Park, Sangkyu	Back, Kyoungwhan	6	0	1	1	0	0	0	0	0	0	0	0	0	0	0	0	0	0	0	0	0	0	0	0	0	0	0	0	0	0	0	0	0	0	0	0	0	0	0	0	0	0
Resveratrol affects in a different way primary versus fixed DNA damage induced by H2O2 in mammalian cells in vitro	De Salvia, R; Festa, F; Ricordy, R; Perticone, P; Cozzi, R	Resveratrol (3,5,4'-trihydroxystilbene) is a natural occurring molecule, synthesized by plants in response to different stresses. Recent literature data seem to converge in indicating Resveratrol as an agent possessing protective effects against oxidative stresses through different mechanisms. Furthermore conflicting data are present in relation to its activity of free radical scavenger. Here we …	TOXICOLOGY LETTERS	2002	10.1016/S0378-4274(02)00151-0	De Salvia, R	Cozzi, R	5	0	0	0	0	1	0	0	0	0	0	0	0	0	0	0	0	0	0	0	0	0	0	1	1	1	1	0	0	0	0	0	1	0	0	0	0	0	0	0	0	0
Melatonin alleviates iron stress by improving iron homeostasis, antioxidant defense and secondary metabolism in cucumber	Ahammed, Golam Jalal; Wu, Meijuan; Wang, Yaqi; Yan, Yaru; Mao, Qi; Ren, Jingjing; Ma, Ronghui; Liu, Airong; Chen, Shuangchen	Iron is an essential element for plants and animals; however, deficit or excess iron can result in stress on plants. In this study, we unveiled the mechanisms of shoot-based tolerance to iron toxicity by melatonin (N-acetyl-5-methoxytryptamine) in cucumber plants. Both low and high iron (Fe) supply in hydroponics decreased growth and biomass accumulation, induced chlorosis and oxidative stress, a…	SCIENTIA HORTICULTURAE	2020	10.1016/j.scienta.2020.109205	Ahammed, Golam Jalal	Chen, Shuangchen	9	0	0	0	1	1	0	0	0	0	0	0	0	0	0	0	0	0	0	0	0	0	0	1	1	1	0	0	0	0	0	0	0	0	1	0	0	0	0	0	0	0
Exogenous Melatonin Enhances Cold, Salt and Drought Stress Tolerance by Improving Antioxidant Defense in Tea Plant (Camellia sinensis (L.) O. Kuntze)	Li, Jiahao; Yang, Yiqing; Sun, Kang; Chen, Yi; Chen, Xuan; Li, Xinghui	Melatonin is a biological hormone that plays crucial roles in stress tolerance. In this study, we investigated the effect of exogenous melatonin on abiotic stress in the tea plant. Under cold, salt and drought stress, increasing malondialdehyde levels and decreasing maximum photochemical efficiency of PSII were observed in tea leaves. Meanwhile, the levels of reactive oxygen species (ROS) increas…	MOLECULES	2019	10.3390/molecules24091826	Li, Jiahao	Li, Xinghui	6	0	1	1	1	0	0	0	0	0	0	0	0	0	0	0	0	0	0	0	0	0	0	0	1	1	0	1	1	0	0	0	0	0	0	0	0	0	0	0	0	0
COMT1 Silencing Aggravates Heat Stress-Induced Reduction in Photosynthesis by Decreasing Chlorophyll Content, Photosystem II Activity, and Electron Transport Efficiency in Tomato	Ahammed, Golam J.; Xu, Wen; Liu, Airong; Chen, Shuangchen	Despite a range of initiatives to reduce global carbon emission, the mean global temperature is increasing due to climate change. Since rising temperatures pose a serious threat of food insecurity, it is important to further explore important biological molecules that can confer thermotolerance to plants. Recently, melatonin has emerged as a universal abiotic stress regulator that can enhance pla…	FRONTIERS IN PLANT SCIENCE	2018	10.3389/fpls.2018.00998	Ahammed, Golam J.	Chen, Shuangchen	4	0	0	0	1	1	0	0	0	0	0	0	0	0	0	0	0	0	0	0	0	0	0	0	0	1	0	0	0	0	0	0	1	0	1	0	0	0	0	0	0	0
H2O2 mediates ALA-induced glutathione and ascorbate accumulation in the perception and resistance to oxidative stress in Solanum lycopersicum at low temperatures	Liu, Tao; Hu, Xiaohui; Zhang, Jiao; Zhang, Junheng; Du, Qingjie; Li, Jianming	Background: Low temperature is a crucial factor influencing plant growth and development. The chlorophyll precursor, 5-aminolevulinic acid (ALA) is widely used to improve plant cold tolerance. However, the interaction between H2O2 and cellular redox signaling involved in ALA-induced resistance to low temperature stress in plants remains largely unknown. Here, the roles of ALA in perceiving and re…	BMC PLANT BIOLOGY	2018	10.1186/s12870-018-1254-0	Liu, Tao	Li, Jianming	6	0	0	0	1	0	0	0	0	0	0	0	0	0	0	0	0	0	0	0	0	0	0	0	1	0	1	0	1	0	0	0	0	0	1	0	0	0	0	0	0	0
Exogenous Melatonin Mitigates Acid Rain Stress to Tomato Plants through Modulation of Leaf Ultrastructure, Photosynthesis and Antioxidant Potential	Debnath, Biswojit; Hussain, Mubasher; Irshad, Muhammad; Mitra, Sangeeta; Li, Min; Liu, Shuang; Qiu, Dongliang	Acid rain (AR) is a serious global environmental issue causing physio-morphological changes in plants. Melatonin, as an indoleamine molecule, has been known to mediate many physiological processes in plants under different kinds of environmental stress. However, the role of melatonin in acid rain stress tolerance remains inexpressible. This study investigated the possible role of melatonin on dif…	MOLECULES	2018	10.3390/molecules23020388	Debnath, Biswojit	Qiu, Dongliang	7	0	0	0	1	0	0	0	0	0	0	0	0	0	0	0	0	0	0	0	0	0	0	1	1	1	0	0	0	0	0	0	0	0	0	0	0	0	0	0	0	0
Melatonin Improves the Photosynthetic Carbon Assimilation and Antioxidant Capacity in Wheat Exposed to Nano-ZnO Stress	Zuo, Zhiyu; Sun, Luying; Wang, Tianyu; Miao, Peng; Zhu, Xiancan; Liu, Shengqun; Song, Fengbin; Mao, Hanping; Li, Xiangnan	The release of nanoparticles into the environment is inevitable, which has raised global environmental concern. Melatonin is involved in various stress responses in plants. The present study investigated the effects of melatonin on photosynthetic carbon (C) assimilation and plant growth in nano-ZnO stressed plants. It was found that melatonin improved the photosynthetic C assimilation in nano-ZnO…	MOLECULES	2017	10.3390/molecules22101727	Zuo, Zhiyu	Li, Xiangnan	9	0	0	0	0	0	0	0	0	0	0	0	0	0	0	0	0	0	0	0	0	0	0	0	1	0	0	0	0	0	0	0	0	0	1	0	0	0	0	0	0	0
Zinc and multi-mineral supplementation should mitigate the pathogenic impact of cadmium exposure	McCarty, Mark F.	High-level cadmium (Cd) exposure has long been known to induce nephropathy, severe osteoporosis, and fractures in humans. More recent epidemiology, however, reveals that, in populations not known to have important industrial exposure to this heavy metal, high-normal blood or urine Cd levels correlate with increased risk for vascular disorders, cancers, diabetes, and total mortality, as well as os…	MEDICAL HYPOTHESES	2012	10.1016/j.mehy.2012.07.043	#VALUE!	#VALUE!	1	0	0	0	0	0	0	0	0	0	0	0	0	0	0	0	0	0	0	0	0	0	0	0	1	1	0	0	0	0	0	0	0	0	0	0	0	0	0	0	0	0
Integrative roles of nitric oxide and hydrogen sulfide in melatonin-induced tolerance of pepper (Capsicum annuum L.) plants to iron deficiency and salt stress alone or in combination	Kaya, Cengiz; Higgs, David; Ashraf, Muhammad; Alyemeni, Mohammed N.; Ahmad, Parvaiz	There seems to be no report in the literature on the effect of melatonin (MT) in relieving the detrimental effects of combined application of salt stress (SS) and iron deficiency (ID). Therefore, the effect of MT on the accumulation/synthesis of endogenous nitric oxide (NO) and hydrogen sulphide (H2S) and how far these molecules are involved in MT-improved tolerance to the combined application of…	PHYSIOLOGIA PLANTARUM	2020	10.1111/ppl.12976	Kaya, Cengiz	Ahmad, Parvaiz	5	0	0	1	0	1	0	0	0	0	0	0	0	0	0	0	0	0	0	0	0	0	0	0	1	1	0	0	0	0	0	0	0	0	0	0	0	0	0	0	0	0
Melatonin delays leaf senescence of Chinese flowering cabbage by suppressing ABFs-mediated abscisic acid biosynthesis and chlorophyll degradation	Tan, Xiao-Li; Fan, Zhong-qi; Kuang, Jian-fei; Lu, Wang-jin; Reiter, Russel J.; Lakshmanan, Prakash; Su, Xin-guo; Zhou, Jie; Chen, Jian-ye; Shan, Wei	Melatonin and abscisic acid (ABA) play contrasting roles in regulating leaf senescence in plants. The molecular mechanism underlying the interaction between melatonin and ABA involved in leaf senescence, however, remains poorly defined. Herein, we found that exogenous application of melatonin delayed the senescence of Chinese flowering cabbage, accompanied by reduced expression of chlorophyll cat…	JOURNAL OF PINEAL RESEARCH	2019	10.1111/jpi.12570	Tan, Xiao-Li	Shan, Wei	10	0	1	1	1	1	0	0	0	0	0	0	0	0	0	0	0	0	0	0	0	0	0	0	0	0	0	0	0	0	0	1	0	0	1	0	0	0	1	1	0	0
Melatonin Inhibits Ethylene Synthesis via Nitric Oxide Regulation To Delay Postharvest Senescence in Pears	Liu, Jianlong; Yang, Jie; Zhang, Haiqi; Cong, Liu; Zhai, Rui; Yang, Chengquan; Wang, Zhigang; Ma, Fengwang; Xu, Lingfei	Understanding ripening and senescence processes in postharvest stored fruit is key to the identification and implementation of effective treatment methods. Here, we explored the effects of exogenous applications of melatonin (MT) and nitric oxide (NO) on ripening and softening processes in three cultivars of European pear (Pyrus communis L.). The results showed that MT and NO played important rol…	JOURNAL OF AGRICULTURAL AND FOOD CHEMISTRY	2019	10.1021/acs.jafc.8b06580	Liu, Jianlong	Xu, Lingfei	9	0	0	0	1	0	0	0	0	0	0	0	0	0	0	0	0	0	0	0	0	0	0	0	0	0	0	0	0	0	0	1	0	0	0	0	0	0	1	0	0	0
Exogenous melatonin promotes biomass accumulation and photosynthesis of kiwifruit seedlings under drought stress	Liang, Dong; Ni, Zhiyou; Xia, Hui; Xie, Yue; Lv, Xiulan; Wang, Jin; Lin, Lijin; Deng, Qunxian; Luo, Xian	Melatonin is involved in regulating plant growth and responding to multiple environmental stresses. The underlying mechanism by which melatonin mediates drought tolerance in some plant species remains unknown. We investigated the effects of melatonin with different doses (50, 100, and 200 mu M) on growth and photosynthesis in kiwifruit (A. chinensis var. deliciosa cv. Qinmei) seedlings under drou…	SCIENTIA HORTICULTURAE	2019	10.1016/j.scienta.2018.10.058	Liang, Dong	Luo, Xian	9	0	0	0	1	0	0	0	0	0	0	0	0	0	0	0	0	0	0	0	0	0	0	0	0	0	0	0	0	0	0	0	1	0	0	0	0	0	0	0	0	0
Rice histone deacetylase 10 and Arabidopsis histone deacetylase 14 genes encode N-acetylserotonin deacetylase, which catalyzes conversion of N-acetylserotonin into serotonin, a reverse reaction for melatonin biosynthesis in plants	Lee, Kyungjin; Lee, Hyoung Yool; Back, Kyoungwhan	In plants, melatonin production is strictly regulated, unlike the production of its precursor, serotonin, which is highly inducible in response to stimuli, such as senescence and pathogen exposure. Exogenous serotonin treatment does not greatly induce the production of N-acetylserotonin (NAS) and melatonin in plants, which suggests the possible existence of one or more regulatory genes in the pat…	JOURNAL OF PINEAL RESEARCH	2018	10.1111/jpi.12460	Lee, Kyungjin	Back, Kyoungwhan	3	0	0	0	1	0	0	0	0	0	0	0	0	0	0	0	0	0	0	0	0	0	0	0	0	0	0	0	0	0	0	0	0	0	0	0	0	0	1	0	0	0
Melatonin may exert a protective role against drought stress in maize	Fleta-Soriano, E.; Diaz, L.; Bonet, E.; Munne-Bosch, S.	Melatonin (N-acetyl-5methoxytryptamine) is an amphiphilic low-molecular-weight compound found in evolutionary distant living organisms, from bacteria to mammals. It can be synthesized by plants and acts as a potent antioxidant and/or a regulator of plant growth and development. Here, we investigated the role of melatonin in plant response to drought stress and recovery in maize (Zea mays L.) plan…	JOURNAL OF AGRONOMY AND CROP SCIENCE	2017	10.1111/jac.12201	Fleta-Soriano, E.	Munne-Bosch, S.	4	0	0	0	1	1	0	0	0	0	0	0	0	0	0	0	0	0	0	0	0	0	0	0	1	0	0	0	0	0	0	0	0	0	0	0	0	0	0	1	0	1
Melatonin Improves the Photosynthetic Apparatus in Pea Leaves Stressed by Paraquat via Chlorophyll Breakdown Regulation and Its Accelerated de novo Synthesis	Szafranska, Katarzyna; Reiter, Russel J.; Posmyk, Malgorzata M.	The positive effect of melatonin on the function of the photosynthetic apparatus is known, but little is known about the specific mechanisms of melatonin's action in plants. The influence of melatonin on chlorophyll metabolism of 24-day-old Pisum sativum L. seedlings during paraquat (PQ)-induced oxidative stress was investigated in this study. Seeds were hydro-primed with water (H), 50 and 200 ?M…	FRONTIERS IN PLANT SCIENCE	2017	10.3389/fpls.2017.00878	Szafranska, Katarzyna	Posmyk, Malgorzata M.	3	0	0	0	0	0	0	0	0	0	0	0	0	0	0	0	0	0	0	0	0	0	0	1	0	0	0	0	0	0	0	0	0	0	1	0	0	0	0	0	0	0
Exogenous Melatonin Mitigates Photoinhibition by Accelerating Non-photochemical Quenching in Tomato Seedlings Exposed to Moderate Light during Chilling	Ding, Fei; Wang, Meiling; Liu, Bin; Zhang, Shuoxin	Melatonin plays an important role in tolerance to multiple stresses in plants. Recent studies have shown that melatonin relieves photoinhibition in plants under cold stress; however, the mechanisms are not fully understood. Non-photochemical quenching (NPQ) is a key process thermally dissipating excess light energy that plants employ as a protective mechanism to prevent the over reduction of phot…	FRONTIERS IN PLANT SCIENCE	2017	10.3389/fpls.2017.00244	Ding, Fei	Zhang, Shuoxin	4	0	0	0	1	0	0	0	0	0	0	0	0	0	0	0	0	0	0	0	0	0	0	0	0	0	0	0	0	0	0	0	1	0	0	0	0	0	0	0	0	0
Melatonin alleviates aluminium toxicity through modulating antioxidative enzymes and enhancing organic acid anion exudation in soybean	Zhang, Jiarong; Zeng, Bingjie; Mao, Yawen; Kong, Xiangying; Wang, Xinxun; Yang, Ye; Zhang, Jie; Xu, Jin; Rengel, Zed; Chen, Qi	Aluminium (Al) toxicity is a major chemical constraint limiting plant growth and production on acidic soils. Melatonin (N-acetyl-5-methoxytryptamine) is a ubiquitous molecule that plays crucial roles in plant growth and stress tolerance. However, there is no knowledge regarding whether melatonin is involved in plant responses to Al stress. Here, we show that optimal concentrations of melatonin co…	FUNCTIONAL PLANT BIOLOGY	2017	10.1071/FP17003	Zhang, Jiarong	Chen, Qi	10	0	0	0	0	1	0	0	0	0	0	0	0	0	0	0	0	0	0	0	0	0	0	0	1	0	1	0	0	0	0	0	0	0	0	0	0	0	0	0	0	0
Comparative Transcriptional Profiling of Melatonin Synthesis and Catabolic Genes Indicates the Possible Role of Melatonin in Developmental and Stress Responses in Rice	Wei, Yunxie; Zeng, Hongqiu; Hu, Wei; Chen, Lanzhen; He, Chaozu; Shi, Haitao	As a well-known animal hormone, melatonin (N-acetyl-5-methoxytryptamine) is also involved in multiple plant biological processes, especially in various stress responses. Rice is one of the most important crops, and melatonin is taken in by many people everyday from rice. However, the transcriptional profiling of melatonin related genes in rice is largely unknown. In this study, the expression pat…	FRONTIERS IN PLANT SCIENCE	2016	10.3389/fpls.2016.00676	Wei, Yunxie	Shi, Haitao	6	0	1	1	0	0	0	0	0	0	0	0	0	0	0	0	0	0	0	0	0	0	0	0	0	1	0	0	0	1	0	0	1	0	0	0	0	0	0	1	0	0
Exogenous melatonin improves corn (Zea mays L.) embryo proteome in seeds subjected to chilling stress	Kolodziejczyk, Izabela; Dzitko, Katarzyna; Szewczyk, Rafal; Posmyk, Malgorzata M.	Melatonin (MEL; N-acetyl-5-methoxytryptamine) plays an important role in plant stress defense. Various plant species rich in this indoleamine have shown a higher capacity for stress tolerance. Moreover, it has great potential for plant biostimulation, is biodegradable and non-toxic for the environment. All this indicates that our concept of seed enrichment with exogenous MEL is justified. This wo…	JOURNAL OF PLANT PHYSIOLOGY	2016	10.1016/j.jplph.2016.01.012	Kolodziejczyk, Izabela	Posmyk, Malgorzata M.	4	0	0	0	1	0	0	0	0	0	0	0	0	0	0	0	0	0	0	0	0	0	0	0	0	0	0	0	0	0	0	0	0	0	0	0	0	0	0	0	0	0
Effect of Illumination on the Content of Melatonin, Phenolic Compounds, and Antioxidant Activity During Germination of Lentils (Lens culinaris L.) and Kidney Beans (Phaseolus vulgaris L.)	Aguilera, Yolanda; Liebana, Rosa; Herrera, Teresa; Rebollo-Hernanz, Miguel; Sanchez-Puelles, Carlos; Benitez, Vanesa; Martin-Cabrejas, Maria A.	This study reports the effects of two different illumination conditions during germination (12 h light/12 h dark vs 24 h dark) in lentils (Lens culinaris L.) and kidney beans (Phaseolus vulgaris L.) on the content of melatonin and phenolic compounds, as well as the antioxidant activity. Germination led to relative increase in melatonin content and significant antioxidant activity, while the conte…	JOURNAL OF AGRICULTURAL AND FOOD CHEMISTRY	2014	10.1021/jf503613w	Aguilera, Yolanda	Martin-Cabrejas, Maria A.	7	0	1	1	0	0	0	0	0	0	0	0	0	0	0	0	0	0	0	0	0	0	0	0	1	0	0	0	0	0	0	0	1	0	0	0	0	0	0	0	0	0
Profiling the melatonin content in organs of the pepper plant during different growth stages	Korkmaz, Ahmet; Deger, Ozlem; Cuci, Yakup	Melatonin (N-acetyl-5-methoxytryptamine), a well-known animal hormone, was first isolated from bovine pineal gland and, since then, it was discovered in evolutionary distant organisms including bacteria, algae, invertebrates, and finally in higher plants. Although the presence of melatonin in plants seems to be a universal phenomenon, there is still an absence of information on its occurrence in …	SCIENTIA HORTICULTURAE	2014	10.1016/j.scienta.2014.04.018	Korkmaz, Ahmet	Cuci, Yakup	3	0	1	1	0	0	0	0	0	0	0	0	0	0	0	0	0	0	0	0	0	0	0	0	0	0	0	0	0	0	0	0	0	0	0	0	0	0	0	0	0	0
Comparison of the binding and reactivity of plant and mammalian peroxidases to indole derivatives by computational docking	Hallingback, HR; Gabdoulline, RR; Wade, RC	The oxidation of melatonin by the mammalian myeloperoxidase (MPO) provides protection against the damaging effects of reactive oxygen species. Indole derivatives, such as melatonin and serotonin, are also substrates of the plant horseradish peroxidase (HRP), but this enzyme exhibits remarkable differences from MPO in the specificity and reaction rates for these compounds. A structural understandi…	BIOCHEMISTRY	2006	10.1021/bi051510e	Hallingback, HR	Wade, RC	3	0	0	0	0	0	0	0	0	0	0	0	0	0	0	0	0	0	0	0	0	0	0	0	0	1	0	0	0	0	0	0	0	0	0	0	0	0	0	0	0	0
Exogenous Melatonin Counteracts NaCl-Induced Damage by Regulating the Antioxidant System, Proline and Carbohydrates Metabolism in Tomato Seedlings	Siddiqui, Manzer H.; Alamri, Saud; Al-Khaishany, Mutahhar Y.; Khan, M. Nasir; Al-Amri, Abdullah; Ali, Hayssam M.; Alaraidh, Ibrahim A.; Alsahli, Abdulaziz A.	Melatonin, a natural agent, has multiple functions in animals as well as in plants. However, its possible roles in plants under abiotic stress are not clear. Nowadays, soil salinity is a major threat to global agriculture because a high soil salt content causes multiple stresses (hyperosmotic, ionic, and oxidative). Therefore, the aim of the present study was to explore: (1) the involvement of me…	INTERNATIONAL JOURNAL OF MOLECULAR SCIENCES	2019	10.3390/ijms20020353	Siddiqui, Manzer H.	Alsahli, Abdulaziz A.	8	0	1	1	1	0	0	0	0	0	0	0	0	0	0	0	0	0	0	0	0	0	0	1	1	1	1	1	1	0	0	0	0	0	1	0	0	0	0	0	0	0
Melatonin enhances astaxanthin accumulation in the green microalga Haematococcus pluvialis by mechanisms possibly related to abiotic stress tolerance	Ding, Wei; Zhao, Peng; Peng, Jun; Zhao, Yongteng; Xu, Jun-Wei; Li, Tao; Reiter, Russel J.; Ma, Huixian; Yu, Xuya	Melatonin (N-acetyl-5-methoxytryptamine) is widely regarded as an important messenger in higher plants and mammals in their resistance to various biotic and abiotic stresses. However, the role of melatonin in microalgae has been rarely investigated. In this study, melatonin was first used to promote astaxanthin biosynthesis under limited nitrogen and high light conditions. The interactions betwee…	ALGAL RESEARCH-BIOMASS BIOFUELS AND BIOPRODUCTS	2018	10.1016/j.algal.2018.05.021	Ding, Wei	Yu, Xuya	9	0	0	0	0	0	0	0	0	0	0	0	0	0	0	0	0	0	0	0	0	0	0	0	0	0	0	0	0	0	0	0	1	1	0	0	0	0	0	0	0	1
The effect of pH on horseradish peroxidase-catalyzed oxidation of melatonin: production of N-1-acetyl-N-2-formyl-5-methoxykynuramine versus radical-mediated degradation	Ximenes, Valdecir F.; Fernandes, Joao Roberto; Bueno, Vania B.; Catalani, Luiz H.; de Oliveira, Georgino H.; Machado, Rosangela G. P.	There is a g-rowing body of evidence that melatonin and its oxidation product, N-1-acetyl-N-2-formyl-5-methoxykynuramine (AFMK), have anti-inflammatory properties. From a nutritional point of view, the discovery of melatonin in plant tissues emphasizes the importance of its relationship with plant peroxidases. Here we found that the pH of the reaction mixture has a profound influence in the react…	JOURNAL OF PINEAL RESEARCH	2007	10.1111/j.1600-079X.2007.00419.x	Ximenes, Valdecir F.	Machado, Rosangela G. P.	6	0	0	0	0	0	0	1	0	1	0	0	0	0	0	0	1	0	0	0	0	0	0	0	0	0	0	0	0	0	0	0	0	0	0	0	0	0	0	0	0	0
Melatonin alleviates chilling stress in cucumber seedlings by up-regulation of CsZat12 and modulation of polyamine and abscisic acid metabolism	Zhao, Hailiang; Zhang, Kai; Zhou, Xiaoting; Xi, Linjie; Wang, Yuping; Xu, Hongjun; Pan, Tonghua; Zou, Zhirong	To obtain new insights into the mechanisms of the positive effects of exogenous melatonin applications to cucumber seedlings during chilling, we investigated its role in regulating photosynthesis, the transcription level of csZat12 and the metabolism of polyamines (PAs) and of abscisic acid (ABA). The negative effects of chilling were clearly alleviated in cucumber seedlings by irrigation with 20…	SCIENTIFIC REPORTS	2017	10.1038/s41598-017-05267-3	Zhao, Hailiang	Zou, Zhirong	8	0	1	0	1	0	0	0	0	0	0	0	0	0	0	0	0	0	0	0	0	0	0	1	0	0	0	0	0	0	0	0	0	0	0	0	0	0	0	1	0	0
In vitro propagation of North American ginseng (Panax quinquefolius L.)	Uchendu, Esther E.; Paliyath, Gopinadhan; Brown, Dan C. W.; Saxena, Praveen K.	North American ginseng (NAG) (Panax quinquefolius L.) is a medicinally important plant with multiple uses in the natural health product industry. As seed propagation is time-consuming because of the slow growth cycle of the plant, in vitro propagation using a bioreactor system was evaluated as an effective approach to accelerate plant production. An efficient method was developed to multiply noda…	IN VITRO CELLULAR & DEVELOPMENTAL BIOLOGY-PLANT	2011	10.1007/s11627-011-9379-y	Uchendu, Esther E.	Saxena, Praveen K.	4	0	1	0	0	0	0	0	0	0	0	0	0	0	0	0	0	0	0	0	0	0	0	0	0	0	0	0	0	0	0	0	0	0	0	0	0	0	0	0	0	0
Interferon-gamma independent oxidation of melatonin by macrophages	Rodrigues, MR; Rodriguez, D; Catalani, LH; Russo, M; Campa, A	Mononuclear phagocytes appear to synthesize kynurenine-like products from the oxidation of biologically active indole compounds including melatonin, catalyzed by interferon (IFN)-gamma -inducible enzyme indoleamine 2,3-dioxygenase (IDO). Concanavalin A (Con A) is a plant lectin that induces interferon-gamma (IFN-gamma ) production by T cells. In this study we investigated whether Con A-primed per…	JOURNAL OF PINEAL RESEARCH	2003	10.1034/j.1600-079X.2003.02944.x	Rodrigues, MR	Campa, A	5	0	0	0	0	0	0	0	0	0	0	0	0	0	0	0	1	0	0	0	0	0	0	0	0	0	0	0	0	0	0	0	0	0	0	0	0	0	0	0	0	0
Teas and herbal infusions as sources of melatonin and other bioactive non-nutrient components	Herrera, Teresa; Aguilera, Yolanda; Rebollo-Hernanz, Miguel; Bravo, Elena; Benitez, Vanesa; Martinez-Saez, Nuria; Arribas, Silvia M.; Dolores del Castillo, Maria; Martin-Cabrejas, Maria A.	The consumption of teas and herbal infusions has increased in Europe and the USA in recent years. The goal of this work was to provide new knowledge on the contents of melatonin and other bioactive non-nutrient compounds of nineteen highly consumed herbal infusions. Melatonin was previously assessed in some medicinal plants alcoholic extracts but not described in herbal aqueous infusions as we re…	LWT-FOOD SCIENCE AND TECHNOLOGY	2018	10.1016/j.lwt.2017.10.031	Herrera, Teresa	Martin-Cabrejas, Maria A.	9	1	0	0	0	0	0	0	0	0	0	0	0	0	0	0	0	0	0	0	0	0	0	0	1	0	0	0	0	0	0	0	0	0	0	0	0	0	0	0	0	0
Exogenous application of a low concentration of melatonin enhances salt tolerance in rapeseed (Brassica napus L.) seedlings	Zeng Liu	Melatonin is a naturally occurring compound in plants. Here, we tested the effect of exogenous melatonin on rapeseed (Brassica napus L.) grown under salt stress. Application of 30 mu mol L-1 melatonin alleviated salt-induced growth inhibition, and the shoot fresh weight, the shoot dry weight, the root fresh weight, and the root dry weight of seedlings treated with exogenous melatonin increased by…	JOURNAL OF INTEGRATIVE AGRICULTURE	2018					0	0	0	1	0	0	0	0	0	0	0	0	0	0	0	0	0	0	0	0	0	0	0			1	0	0		0			0	0	0	0	0		0	0	0
Molecular cloning of melatonin 3-hydroxylase and its production of cyclic 3-hydroxymelatonin in rice (Oryza sativa)	Lee, Kyungjin; Zawadzka, Anna; Czarnocki, Zbigniew; Reiter, Russel J.; Back, Kyoungwhan	Melatonin is metabolized in animals to cyclic 3-hydroxymelatonin (3-OHM) not by an enzymatic pathway, but by interaction with hydroxyl radicals. The production of 3-OHM in animals suggests the possible presence of 3-OHM in plants. Prior to the identification of 3-OHM in plants, we directly cloned the corresponding gene(s) responsible for 3-OHM synthesis using Escherichia coli library strains expr…	JOURNAL OF PINEAL RESEARCH	2016	10.1111/jpi.12361	Lee, Kyungjin	Back, Kyoungwhan	5	0	0	0	0	0	0	1	1	1	0	0	1	0	0	0	0	0	0	0	0	0	0	1	0	0	0	0	0	0	0	0	0	0	0	0	0	0	0	0	0	0
Indoleamines and calcium enhance somatic embryogenesis in Coffea canephora P ex Fr	Ramakrishna, A.; Giridhar, P.; Jobin, M.; Paulose, C. S.; Ravishankar, G. A.	Melatonin (MEL) and serotonin (SER) are important indoleamines that are involved in neural transmission in mammalian cells. They are also known to be present in various genera of plants. The role (s) of these indoleamines in plants are not well known. In this study, the effects of SER, MEL, calcium, and calcium ionophore (A23187), a calcium channel activator, on somatic embryogenesis in Coffea ca…	PLANT CELL TISSUE AND ORGAN CULTURE	2012	10.1007/s11240-011-0039-z	Ramakrishna, A.	Ravishankar, G. A.	5	1	1	0	0	1	0	0	0	0	0	0	0	0	0	0	0	0	0	0	0	0	0	0	0	0	0	0	0	0	0	0	0	0	0	0	0	0	0	0	0	0
Phytomelatonin in the leaves and fruits of wild perennial plants	Zohar, Ram; Izhaki, Ido; Koplovich, Avi; Ben-Shlomo, Rachel	Phytomelatonin has been documented in numerous flowering plants, mostly in cultivated species consumed by humans. Although frugivorous animals feed on fruits, the phytomelatonin content of these organs has hardly ever been tested in wild plants. The aim of this study was to determine the levels of phytomelatonin in the leaves and fleshy fruits of 31 wild perennial species known to be eaten by her…	PHYTOCHEMISTRY LETTERS	2011	10.1016/j.phytol.2011.04.002	Zohar, Ram	Ben-Shlomo, Rachel	4	0	1	1	0	0	0	0	0	0	0	0	0	0	0	0	0	0	0	0	0	0	0	0	0	0	0	0	0	0	0	0	0	0	0	0	0	0	0	0	0	0
Measurement of melatonin in alcoholic and hot water extracts of Tanacetum parthenium, Tripleurospermum disciforme and Viola odorata	Ansari, M.; Rafiee, Kh; Yasa, N.; Vardasbi, S.; Naimi, S. M.; Nowrouzi, A.	Background and the purpose of the study: Melatonin has recently been found in several plant tissues. Some reports show that the majority of the herbs containing the high level of melatonin have been used traditionally to treat neurological disorders or diseases associated with the generation of free radicals. Current study was undertaken to screen some medicinal plant species with historical evid…	DARU-JOURNAL OF PHARMACEUTICAL SCIENCES	2010		Ansari, M.	Nowrouzi, A.	6	0	0	0	0	0	0	0	0	0	0	0	0	0	0	0	0	0	0	0	0	0	0	0	0	1	0	0	0	0	0	0	0	1	0	0	0	0	0	0	0	0
Antioxidant flavonoid glycosides from Evolvulus alsinoides	Kumar, Manmeet; Ahmad, Ausaf; Rawat, Preeti; Khan, Mohammad Faheem; Rasheed, Naila; Gupta, Prasoon; Sathiamoorthy, B.; Bhatia, Gitika; Palit, Gautam; Maurya, Rakesh	Oxidative damage is an established outcome of chronic stress. Thus, the present study was designed to investigate the modulatory role of ethanolic extract of Evolvulus alsinoides (EA) in terms of oxidative alterations at peripheral and central level in rats subjected to chronic unpredictable stress (CUS). CUS exposure for 7 days reduced Cu, Zn superoxide dismutase and catalase activity with incre…	FITOTERAPIA	2010	10.1016/j.fitote.2009.09.003	Kumar, Manmeet	Maurya, Rakesh	10	0	0	0	0	0	0	0	0	0	0	0	0	0	0	0	0	0	0	0	0	0	0	0	1	0	0	0	1	0	0	0	0	0	0	0	0	0	0	0	0	0
Exogenous Melatonin Alleviates Oxidative Damages and Protects Photosystem II in Maize Seedlings Under Drought Stress	Huang, Bo; Chen, Yang-Er; Zhao, Yu-Qing; Ding, Chun-Bang; Liao, Jin-Qiu; Hu, Chao; Zhou, Li-Jun; Zhang, Zhong-Wei; Yuan, Shu; Yuan, Ming	The protective role of melatonin in plants against various abiotic stresses have been widely demonstrated, but poorly explored in organ-specific responses and the transmission of melatonin signals across organs. In this study, the effects of melatonin with the root-irrigation method and the leaf-spraying method on the antioxidant system and photosynthetic machinery in maize seedlings under drough…	FRONTIERS IN PLANT SCIENCE	2019	10.3389/fpls.2019.00677	Huang, Bo	Yuan, Ming	10	0	1	1	1	0	0	0	0	0	0	0	0	0	0	0	0	0	0	0	0	0	0	1	0	0	0	0	0	0	0	0	0	0	0	0	0	0	0	0	0	0
Melatonin is involved in skotomorphogenesis by regulating brassinosteroid biosynthesis in rice plants	Hwang, Ok Jin; Back, Kyoungwhan	Serotonin N-acetyltransferase (SNAT) is the penultimate enzyme in melatonin biosynthesis catalyzing the conversion of serotonin into N-acetylserotonin. In plants, SNAT is encoded by 2 isogenes of which SNAT1 is constitutively expressed and its overexpression confers increased yield in rice. However, the role of SNAT2 remains to be clarified. In contrast to SNAT1, the diurnal rhythm of SNAT2 mRNA …	JOURNAL OF PINEAL RESEARCH	2018	10.1111/jpi.12495	Hwang, Ok Jin	Back, Kyoungwhan	2	0	0	0	1	0	1	0	0	0	0	0	0	0	0	0	0	0	0	0	0	0	0	0	0	0	0	0	0	0	1	0	0	0	0	0	0	0	0	0	0	0
Microchip electrophoresis-single wall carbon nanotube press-transferred electrodes for fast and reliable electrochemical sensing of melatonin and its precursors	Vicente Gomez, Federico Jose; Martin, Aida; Fernanda Silva, Maria; Escarpa, Alberto	In the current work, single-wall carbon nanotube press-transferred electrodes (SW-PTEs) were used for detection of melatonin (MT) and its precursors tryptophan (Trp) and serotonin (5-HT) on microchip electrophoresis (ME). SW-PTEs were simply fabricated by press transferring a filtered dispersion of single-wall carbon nanotubes on a nonconductive PMMA substrate, where single-wall carbon nanotubes …	ELECTROPHORESIS	2015	10.1002/elps.201400580	Vicente Gomez, Federico Jose	Escarpa, Alberto	4	0	0	0	0	0	0	0	0	0	0	0	0	0	0	0	0	0	0	0	0	0	0	0	0	0	0	0	0	0	0	0	0	0	0	0	0	0	0	0	0	0
Chloroplastic and cytoplasmic overexpression of sheep serotonin N-acetyltransferase in transgenic rice plants is associated with low melatonin production despite high enzyme activity	Byeon, Yeong; Lee, Hyoung Yool; Back, Kyoungwhan	Serotonin N-acetyltransferase (SNAT), the penultimate enzyme in melatonin biosynthesis, catalyzes the conversion of serotonin into N-acetylserotonin. Plant SNAT is localized in chloroplasts. To test SNAT localization effects on melatonin synthesis, we generated transgenic rice plants overexpressing a sheep (Ovis aries) SNAT (OaSNAT) in their chloroplasts and compared melatonin biosynthesis with t…	JOURNAL OF PINEAL RESEARCH	2015	10.1111/jpi.12231	Byeon, Yeong	Back, Kyoungwhan	3	0	0	0	0	0	1	1	0	1	0	0	0	0	0	0	0	0	0	0	0	0	0	0	0	0	0	0	0	0	0	0	0	0	0	0	0	0	0	0	0	0
Novel compounds that enhance Agrobacterium-mediated plant transformation by mitigating oxidative stress	Dan, Yinghui; Zhang, Song; Zhong, Heng; Yi, Hochul; Sainz, Manuel B.	Agrobacterium tumefaciens caused tissue browning leading to subsequent cell death in plant transformation and novel anti-oxidative compounds enhanced Agrobacterium -mediated plant transformation by mitigating oxidative stress. Browning and death of cells transformed with Agrobacterium tumefaciens is a long-standing and high impact problem in plant transformation and the agricultural biotechnology…	PLANT CELL REPORTS	2015	10.1007/s00299-014-1707-3	Dan, Yinghui	Sainz, Manuel B.	5	0	0	0	0	0	1	0	0	0	0	0	0	0	0	0	0	0	0	0	0	0	0	0	0	0	0	0	0	0	0	0	0	0	0	0	0	0	0	0	0	0
Water stress-induced abscisic acid accumulation in relation to reducing agents and sulfhydryl modifiers in maize plant	Jia, W; Zhang, J	Signalling process of water stress-induced abscisic acid (ABA) accumulation was investigated in maize (Zea mays L.) leaf and root tissues. Potent free-radical scavengers and reducing agents, N-acetyl cysteine (NAC) and cystein (Cys), significantly inhibited or nearly completely blocked dehydration-induced ABA accumulation. Dithiothreitol (DTT), a reducing agent but not a free-radical scavenger, a…	PLANT CELL AND ENVIRONMENT	2000	10.1046/j.1365-3040.2000.00646.x	Jia, W	Zhang, J	2	0	0	0	0	0	0	0	0	0	0	0	0	0	0	0	0	0	0	0	0	0	0	0	0	0	1	0	1	0	0	0	0	0	0	0	0	0	0	1	0	0
Metabolic analysis of the melatonin biosynthesis pathway using chemical labeling coupled with liquid chromatography-mass spectrometry	Ye, Tiantian; Yin, Xiaoming; Yu, Lei; Zheng, Shu-Jian; Cai, Wen-Jing; Wu, Yan; Feng, Yu-Qi	Characterization of the melatonin (MLT) biosynthesis pathway in plants is still limited. Additionally, a metabolomic analysis of MLT biosynthesis in plants is still a challenge due to analyte structural and chemical diversity, low analyte abundances, and plant matrix complexities. Herein, a sensitive liquid chromatography-mass spectrometry (LC-MS) method enabling the simultaneous determination of…	JOURNAL OF PINEAL RESEARCH	2019	10.1111/jpi.12531	Ye, Tiantian	Feng, Yu-Qi	7	0	0	0	0	0	0	0	0	0	0	0	0	0	0	0	0	0	0	0	0	0	0	0	0	0	0	0	0	0	0	0	0	0	0	0	0	0	0	0	0	0
Novel molecular mechanisms for the adaptogenic effects of herbal extracts on isolated brain cells using systems biology	Panossian, Alexander; Seo, Ean-Jeong; Efferth, Thomas	Introduction: Adaptogens are natural compounds or plant extracts that increase adaptability and survival of organisms under stress. Adaptogens stimulate cellular and organismal defense systems by activating intracellular and extracellular signaling pathways and expression of stress-activated proteins and neuropeptides. The effects adaptogens on mediators of adaptive stress response and longevity …	PHYTOMEDICINE	2018	10.1016/j.phymed.2018.09.204	Panossian, Alexander	Efferth, Thomas	3	0	0	0	0	0	0	0	0	0	0	0	0	0	0	0	0	0	0	0	0	0	0	0	0	0	0	0	0	0	0	0	0	0	0	0	0	0	0	0	0	0
Premature leaf senescence 3, encoding a methyltransferase, is required for melatonin biosynthesis in rice	Hong, Yongbo; Zhang, Yingxin; Sinumporn, Sittipun; Yu, Ning; Zhan, Xiaodeng; Shen, Xihong; Chen, Daibo; Yu, Ping; Wu, Weixun; Liu, Qunen; Cao, Zhaoyun; Zhao, Chunde; Cheng, Shihua; Cao, Liyong	Premature leaf senescence in rice is one of the most common factors affecting the plant's development and yield. Although methyltransferases are involved in diverse biological functions, their roles in rice leaf senescence have not been previously reported. In this study, we identified the premature leaf senescence 3 (pls3) mutant in rice, which led to early leaf senescence and early heading date…	PLANT JOURNAL	2018	10.1111/tpj.13995	Hong, Yongbo	Cao, Liyong	14	0	0	0	1	0	0	0	0	0	0	0	0	0	0	0	0	0	0	0	0	0	0	0	0	0	1	1	0	0	0	0	0	0	1	0	0	0	1	0	0	0
Cold Priming Induced Tolerance to Subsequent Low Temperature Stress is Enhanced by Melatonin Application during Recovery in Wheat	Sun, Luying; Li, Xiangnan; Wang, Zongshuai; Sun, Zhongwei; Zhu, Xiancan; Liu, Shengqun; Song, Fengbin; Liu, Fulai; Wang, Yongjun	Cold priming can alleviate the effects of subsequent cold stress on wheat plant growth. Melatonin plays a key role in cold stress response in plants. In this study, the effects of foliar melatonin application during recovery on the cold tolerance of cold primed wheat plants were investigated. It was found that both melatonin and cold priming increased the photosynthetic rate and stomatal conducta…	MOLECULES	2018	10.3390/molecules23051091	Sun, Luying	Wang, Yongjun	9	0	0	0	0	0	0	0	0	0	0	0	0	0	0	0	0	0	0	0	0	0	0	0	0	0	0	0	0	0	0	0	0	0	0	0	0	0	0	0	0	0
Exogenous melatonin alleviates damage from drought stress in Brassica napus L. (rapeseed) seedlings	Li, Jingjing; Zeng, Liu; Cheng, Yong; Lu, Guangyuan; Fu, Guiping; Ma, Haiqing; Liu, Qingyun; Zhang, Xuekun; Zou, Xiling; Li, Chunsheng	This study investigated the ability of exogenous melatonin (MT) to alleviate drought stress in Brassica napus L. (rapeseed) seedlings. Seedling traits under control condition, drought stress, and drought stress with exogenous MT were evaluated. The results indicated that 0.05 mmol/L exogenous MT had the greatest protective effect against simulated drought stress. Exogenous MT alleviated the seedl…	ACTA PHYSIOLOGIAE PLANTARUM	2018	10.1007/s11738-017-2601-8	Li, Jingjing	Li, Chunsheng	10	0	0	0	1	0	0	0	0	0	0	0	0	0	0	0	0	0	0	0	0	0	0	0	0	0	1	0	0	0	0	0	0	0	0	0	0	0	0	0	0	0
Ameliorative effects of melatonin on dark-induced leaf senescence in gardenia (Gardenia jasminoides Ellis): leaf morphology, anatomy, physiology and transcriptome	Zhao, Daqiu; Wang, Rong; Meng, Jiasong; Li, Zhiyuan; Wu, Yanqing; Tao, Jun	Cut gardenia (Gardenia jasminoides Ellis) foliage is widely used as a vase material or flower bouquet indoors; however, insufficient indoor light accelerates its senescence, which shortens its viewing time. In this study, applying melatonin to delay gardenia leaf senescence when exposed to extremely low light condition (darkness), and the results showed that 1.0 mM was the effective concentration…	SCIENTIFIC REPORTS	2017	10.1038/s41598-017-10799-9	Zhao, Daqiu	Tao, Jun	6	0	1	1	1	1	0	0	0	0	0	0	0	0	0	0	0	0	0	0	0	0	0	1	0	0	0	0	1	0	0	0	0	0	1	1	0	0	1	0	0	0
Two transcriptional activators of N-acetylserotonin O-methyltransferase 2 and melatonin biosynthesis in cassava	Wei, Yunxie; Liu, Guoyin; Bai, Yujing; Xia, Feiyu; He, Chaozu; Shi, Haitao	Similar to the situation in animals, melatonin biosynthesis is regulated by four sequential enzymatic steps in plants. Although the melatonin synthesis genes have been identified in various plants, the upstream transcription factors of them remain unknown. In this study on cassava (Manihot esculenta), we found that MeWRKY79 and heat-shock transcription factor 20 (MeHsf20) targeted the W-box and t…	JOURNAL OF EXPERIMENTAL BOTANY	2017	10.1093/jxb/erx305	Wei, Yunxie	Shi, Haitao	6	0	1	1	1	0	0	0	0	0	0	0	0	0	0	0	0	0	0	0	0	0	0	0	0	0	0	0	0	0	0	0	0	0	0	0	0	0	0	0	0	0
Effect of melatonin, salicylic acid and gibberellic acid on leaf essential oil and other secondary metabolites of bitter orange young seedlings	Sarrou, Eirini; Chatzopoulou, Paschalina; Dimassi-Theriou, Kortessa; Therios, Ioannis; Koularmani, Ageliki	An investigation was carried out in order to estimate the biochemical changes occurring in bitter orange (Citrus aurantium L.) leaves in response to melatonin (MEL), gibberellic acid (GA) and salicylic acid (SA) treatments. We examined the effect of MEL, GA and SA on the essential oil (EO), the total phenolic (TPC) and total flavonoid content (TFC), and the antioxidant activity of bitter orange l…	JOURNAL OF ESSENTIAL OIL RESEARCH	2015	10.1080/10412905.2015.1064485	Sarrou, Eirini	Koularmani, Ageliki	5	0	0	0	0	0	0	0	0	0	0	0	0	0	0	0	0	0	0	0	0	0	0	0	0	0	0	0	0	0	0	0	0	0	0	0	0	0	0	0	1	1
Circadian changes in endogenous concentrations of indole-3-acetic acid, melatonin, serotonin, abscisic acid and jasmonic acid in Characeae (Chara australis Brown)	Beilby, Mary J.; Turi, Christina E.; Baker, Teesha C.; Tymm, Fiona J. M.; Murch, Susan J.	Giant-celled Characeae (Chara australis Brown), grown for 4months on 12/12hr day/night cycle and summer/autumn temperatures, exhibited distinct concentration maxima in auxin (indole-3-acetic acid; IAA), melatonin and serotonin about 4hr after subjective daybreak. These concentration peaks persisted after 3day pretreatment in continuous darkness: confirming a circadian rhythm, rather than a respon…	PLANT SIGNALING & BEHAVIOR	2015	10.1080/15592324.2015.1082697	Beilby, Mary J.	Murch, Susan J.	5	1	1	1	0	1	0	0	0	0	0	0	0	0	0	0	0	0	0	0	0	0	0	0	0	0	0	0	0	0	0	0	0	0	0	0	0	0	0	1	0	0
Melatonin Induces Disease Resistance to Botrytis cinerea in Tomato Fruit by Activating Jasmonic Acid Signaling Pathway	Liu, Chunxue; Chen, Lingling; Zhao, Ruirui; Li, Rui; Zhang, Shujuan; Yu, Wenqing; Sheng, Jiping; Shen, Lin	Melatonin acts as a crucial signaling molecule with multiple physiological functions in plant response to abiotic and biotic stresses. However, the impact and regulatory mechanism of melatonin on attenuating tomato fruit fungal decay are unclear. In this study, we investigated the potential roles of melatonin in modulating fruit resistance to Botrytis cinerea and explored related physiological an…	JOURNAL OF AGRICULTURAL AND FOOD CHEMISTRY	2019	10.1021/acs.jafc.9b00058	Liu, Chunxue	Shen, Lin	8	0	1	1	0	0	0	0	0	0	0	0	0	0	0	0	0	0	0	0	0	0	0	0	0	0	1	0	0	0	0	0	0	0	0	0	0	0	0	0	0	0
The role of endogenous nitric oxide in melatonin-improved tolerance to lead toxicity in maize plants	Okant, Mustafa; Kaya, Cengiz	Melatonin (MT) and nitric oxide (NO) are known as scavengers of free radicals and an antioxidant against biotic and abiotic stresses in plant defense systems. However, whether NO interplays role in MT-induced antioxidant defense remains to be determined in the plants exposed to lead (Pb) toxicity. So, two experiments were designed to evaluate the role of NO in MT-mediated tolerance of maize plant…	ENVIRONMENTAL SCIENCE AND POLLUTION RESEARCH	2019	10.1007/s11356-019-04517-3	Okant, Mustafa	Kaya, Cengiz	2	0	0	0	0	1	0	0	0	0	0	0	0	0	0	0	0	0	0	0	0	0	0	0	0	0	1	1	0	0	0	0	0	0	1	0	0	0	0	0	0	0
Overexpression of TaCOMT Improves Melatonin Production and Enhances Drought Tolerance in Transgenic Arabidopsis	Yang, Wen-Jing; Du, Yong-Tao; Zhou, Yong-Bin; Chen, Jun; Xu, Zhao-Shi; Ma, You-Zhi; Chen, Ming; Min, Dong-Hong	Melatonin (N-acetyl-5-methoxytryptamine) is involved in many developmental processes and responses to various abiotic stresses in plants. Most of the studies on melatonin focus on its functions and physiological responses in plants, while its regulation mechanism remains unknown. Caffeic acid 3-O-methyltransferase (COMT) functions at a key step of the biosynthesis process of melatonin. In this st…	INTERNATIONAL JOURNAL OF MOLECULAR SCIENCES	2019	10.3390/ijms20030652	Yang, Wen-Jing	Min, Dong-Hong	8	0	1	1	0	0	1	0	0	0	0	0	0	0	0	0	0	0	0	0	0	0	0	0	0	0	0	1	0	0	0	0	0	0	0	0	0	0	0	0	0	0
Direct visualization of location and uptake of applied melatonin and serotonin in living tissues and their redistribution in plants in response to thermal stress	Erland, Lauren A. E.; Yasunaga, Adam; Li, Isaac T. S.; Murch, Susan J.; Saxena, Praveen K.	Melatonin and serotonin are important phytochemicals enabling plants to redirect growth in response to environmental stresses. Despite much research on their biosynthetic routes, localization of their biosynthetic enzymes and recent identification of a phytomelatonin receptor, localization of the molecules themselves has to date not been possible. Elucidation of their locations in living tissues …	JOURNAL OF PINEAL RESEARCH	2019	10.1111/jpi.12527	Erland, Lauren A. E.	Saxena, Praveen K.	5	0	0	0	0	0	0	0	0	0	0	0	0	0	0	0	0	0	0	0	0	0	0	0	0	0	0	0	0	0	0	0	0	0	0	0	0	0	0	0	0	0
Effect of melatonin priming on photosynthetic capacity of tomato leaves under low-temperature stress	Yang, X. L.; Xu, H.; Li, D.; Gao, X.; Li, T. L.; Wang, R.	Melatonin has different functions in plant growth and development, especially in the protection of plants suffering from various forms of abiotic stress. We explored the effect of melatonin priming on photosynthetic activity of tomato (Lycopersicon esculentum L.) leaves. Our results showed that 100 A mu M is the optimal concentration used for alleviation of the damage to photosynthetic apparatus.…	PHOTOSYNTHETICA	2018	10.1007/s11099-017-0748-6	Yang, X. L.	Wang, R.	6	0	0	0	0	0	0	0	0	0	0	0	0	0	0	0	0	0	0	0	0	0	0	0	0	0	0	0	0	0	0	0	0	0	0	0	0	0	0	0	0	0
Exogenous Melatonin Improves Tolerance to Water Deficit by Promoting Cuticle Formation in Tomato Plants	Ding, Fei; Wang, Gang; Wang, Meiling; Zhang, Shuoxin	The plant cuticle, composed of cutin and waxes, is a hydrophobic layer coating the aerial organs of terrestrial plants and playing a critical role in limiting water loss. While melatonin has been recently demonstrated to be involved in responses to drought stress in plants, its relationship with cuticle formation is not known. In the present work, we report the effects of melatonin on the formati…	MOLECULES	2018	10.3390/molecules23071605	Ding, Fei	Zhang, Shuoxin	4	0	1	1	1	0	0	0	0	0	0	0	0	0	0	0	0	0	0	0	0	0	0	0	0	0	0	0	0	0	0	0	0	0	1	0	0	0	0	0	0	0
Melatonin Alleviates High Temperature-Induced Pollen Abortion in Solanum lycopersicum	Qi, Zhen-Yu; Wang, Kai-Xin; Yan, Meng-Yu; Kanwar, Mukesh Kumar; Li, Dao-Yi; Wijaya, Leonard; Alyemeni, Mohammed Nasser; Ahmad, Parvaiz; Zhou, Jie	Melatonin is a pleiotropic signal molecule that plays critical roles in regulating plant growth and development, as well as providing physiological protections against various environmental stresses. Nonetheless, the mechanisms for melatonin-mediated pollen thermotolerance remain largely unknown. In this study, we report that irrigation treatment with melatonin (20 mu M) effectively ameliorated h…	MOLECULES	2018	10.3390/molecules23020386	Qi, Zhen-Yu	Zhou, Jie	9	0	0	0	0	0	0	0	0	0	0	0	0	0	0	0	0	0	0	0	0	0	0	0	0	0	0	0	0	0	0	0	0	0	0	0	0	0	0	0	0	0
A Simple, Rapid Method for Determination of Melatonin in Plant Tissues by UPLC Coupled with High Resolution Orbitrap Mass Spectrometry	Ye, Tiantian; Hao, Yan-Hong; Yu, Lei; Shi, Haitao; Reiter, Russel J.; Feng, Yu-Qi	Melatonin (MLT) was involved in regulating various stages of plant growth and development. However, due to the low concentration and complex matrixes of plant, the analysis of MLT is a challenging task. In this study, we developed a rapid and efficient method with simplified sample preparation by employing UPLC coupled with a high resolution Orbitrap mass spectrometry, and stable isotope-labeled …	FRONTIERS IN PLANT SCIENCE	2017	10.3389/fpls.2017.00064	Ye, Tiantian	Feng, Yu-Qi	6	0	1	1	0	0	0	0	0	0	0	0	0	0	0	0	0	0	0	0	0	0	0	0	0	0	0	0	0	0	0	0	0	0	0	0	0	0	0	0	0	0
Melatonin production in Escherichia coli by dual expression of serotonin N-acetyltransferase and caffeic acid O-methyltransferase	Byeon, Yeong; Back, Kyoungwhan	Melatonin is a well-known bioactive molecule produced in animals and plants and a well-studied natural compound. Two enzymatic steps are required for the biosynthesis of melatonin from serotonin. First, serotonin N-acetyltransferase (SNAT) catalyzes serotonin to N-acetylserotonin (NAS) followed by the action of N-acetylserotonin O-methyltransferase (ASMT), resulting in the synthesis of O-methylat…	APPLIED MICROBIOLOGY AND BIOTECHNOLOGY	2016	10.1007/s00253-016-7458-z	Byeon, Yeong	Back, Kyoungwhan	2	0	0	0	0	0	1	0	0	0	0	0	0	0	0	0	0	0	0	0	0	0	0	0	0	0	0	0	0	0	0	0	0	0	0	0	0	0	0	0	0	0
Crystal Structure of Hyp-1, a Hypericum perforatum PR-10 Protein, in Complex with Melatonin	Sliwiak, Joanna; Dauter, Zbigniew; Jaskolski, Mariusz	Hyp-1, a PR-10-fold protein from Hypericum perforatum, was crystallized in complex with melatonin (MEL). The structure confirms the conserved protein fold and the presence of three unusual ligand binding sites, two of which are internal chambers (1,2), while the third one (3) is formed as an invagination of the protein surface. The MEL ligand in site 1 is well defined while that in site 3 seems t…	FRONTIERS IN PLANT SCIENCE	2016	10.3389/fpls.2016.00668	Sliwiak, Joanna	Jaskolski, Mariusz	3	1	1	0	0	0	0	0	0	0	0	0	0	0	0	0	0	0	0	0	0	0	0	0	0	0	0	0	0	0	0	0	0	0	0	0	0	0	0	0	0	0
Melatonin alleviates heat-induced damage of tomato seedlings by balancing redox homeostasis and modulating polyamine and nitric oxide biosynthesis	Jahan, Mohammad Shah; Shu, Sheng; Wang, Yu; Chen, Zheng; He, Mingming; Tao, Meiqi; Sun, Jin; Guo, Shirong	BackgroundMelatonin is a pleiotropic signaling molecule that plays multifarious roles in plants stress tolerance. The polyamine (PAs) metabolic pathway has been suggested to eliminate the effects of environmental stresses. However, the underlying mechanism of how melatonin and PAs function together under heat stress largely remains unknown. In this study, we investigated the potential role of mel…	BMC PLANT BIOLOGY	2019	10.1186/s12870-019-1992-7	Jahan, Mohammad Shah	Guo, Shirong	8	0	0	0	1	1	0	0	0	0	0	0	0	0	0	0	0	0	0	0	0	0	0	0	0	0	1	1	1	0	0	0	0	0	0	0	0	0	0	0	0	0
Using Transcriptome to Discover a Novel Melatonin-Induced Sodic Alkaline Stress Resistant Pathway in Solanum lycopersicum L.	Yan, Yanyan; Jing, Xin; Tang, Huimeng; Li, Xiaotong; Gong, Biao; Shi, Qinghua	Melatonin plays important roles in multiple stress responses. However, the downstream signaling pathway and molecular mechanism are unclear until now. Here, we not only revealed the transcriptional control of melatonin-induced sodic alkaline stress tolerance, but also described a screen for key downstream transcriptional factors of melatonin through transcriptome analysis. The melatonin-induced t…	PLANT AND CELL PHYSIOLOGY	2019	10.1093/pcp/pcz126	Yan, Yanyan	Shi, Qinghua	6	0	1	0	0	0	0	0	0	0	0	0	0	0	0	0	0	0	0	0	0	0	0	0	0	0	0	0	0	0	0	0	0	0	0	0	0	0	0	0	0	0
Melatonin alleviates aluminum-induced root growth inhibition by interfering with nitric oxide production in Arabidopsis	Zhang, Jiarong; Li, Dongxu; Wei, Jian; Ma, Wenna; Kong, Xiangying; Rengel, Zed; Chen, Qi	Root growth inhibition is the primary symptom of aluminum (Al) toxicity. In this study, the roles of nitric oxide (NO) and melatonin, two ubiquitous signal molecules involved in diverse plant physiological processes and stress responses, were investigated in Arabidopsis responses to Al toxicity. The results showed that nitric reductase- and nitric oxide synthase-dependent NO production contribute…	ENVIRONMENTAL AND EXPERIMENTAL BOTANY	2019	10.1016/j.envexpbot.2018.08.014	Zhang, Jiarong	Chen, Qi	7	0	0	0	1	0	0	0	0	0	0	0	0	0	0	0	0	0	0	0	0	0	0	0	0	0	0	0	0	0	0	0	0	0	0	0	0	0	0	0	0	0
Melatonin Improved Waterlogging Tolerance in Alfalfa (Medicago sativa) by Reprogramming Polyamine and Ethylene Metabolism	Zhang, Qiang; Liu, Xiaofei; Zhang, Zhifei; Liu, Ningfang; Li, Danzhu; Hu, Longxing	Melatonin (MT), polyamines (PAs), and ethylene have been suggested to play key roles in plant growth and development in response to environmental abiotic stresses. However, the effect of melatonin on polyamine and ethylene metabolism under waterlogging stress has rarely been elucidated. The main purpose of this study was to investigate the effect of melatonin pretreatment on waterlogging stress i…	FRONTIERS IN PLANT SCIENCE	2019	10.3389/fpls.2019.00044	Zhang, Qiang	Hu, Longxing	6	0	0	0	0	1	0	0	0	0	0	0	0	0	0	0	0	0	0	0	0	0	0	1	0	0	0	1	0	0	0	0	0	0	1	0	0	0	0	0	0	0
Alleviation of cold damage by exogenous application of melatonin in vegetatively propagated tea plant (Camellia sinensis (L.) O. Kuntze)	Li, Jiahao; Arkorful, Emmanuel; Cheng, Siyuan; Zhou, Qiongqiong; Li, Huan; Chen, Xuan; Sun, Kang; Li, Xinghui	Melatonin is involve in plant development and abiotic stress responses. In the present study, the effects of exogenous melatonin on chilling in tea plant were investigated. Compared to control, decreasing chlorophyll contents and increasing malondialdehyde levels in leaves were observed in tea plants treated with chilling at 4 degrees C. Interestingly, compared to chilling treatment, chlorophyll …	SCIENTIA HORTICULTURAE	2018	10.1016/j.scienta.2018.04.068	Li, Jiahao	Li, Xinghui	8	0	1	1	1	0	0	0	0	0	0	0	0	0	0	0	0	0	0	0	0	0	0	0	0	0	0	1	1	0	0	0	0	0	1	0	0	0	0	0	0	0
Melatonin application confers enhanced salt tolerance by regulating Na+ and Cl- accumulation in rice	Li, Xiaojiang; Yu, Bingjun; Cui, Yiqing; Yin, Yifan	The mitigating effects of melatonin (MT) treatment on salt-stressed seed germination capacity and of MT pretreatment (including the whole period of seed germination and seedling cultivation) on the salt tolerance of two rice (Oryza sativa L. ssp. japonica) cultivars, Liaojing 4 (LJ4, salt tolerant) and Nipponbare (Nipp, salt sensitive), and the related physiological and molecular events were inve…	PLANT GROWTH REGULATION	2017	10.1007/s10725-017-0310-3	Li, Xiaojiang	Yin, Yifan	4	0	0	0	0	0	0	0	0	0	0	0	0	0	0	0	0	0	0	0	0	0	0	0	0	0	1	0	1	0	0	0	0	0	0	0	0	0	0	0	0	0
Melatonin and resveratrol reverse the toxic effect of high boron (B) and modulate biochemical parameters in pepper plants (Capsicum annuum L.)	Sarafi, Eleana; Tsouvaltzis, Pavlos; Chatzissavvidis, Christos; Siomos, Anastasios; Therios, Ioannis	The objectives of this research were to test a possible involvement of melatonin (MEL) and resveratrol (RES) in restoring growth and to control boron (B) toxicity in peppers. The plants were subjected to four different nutrient solution treatments as following: 1) half-strength Hoagland's nutrient solution (Control), 2) half-strength Hoagland's nutrient solution-F100 mu M B (100 mu MB), 3) half-s…	PLANT PHYSIOLOGY AND BIOCHEMISTRY	2017	10.1016/j.plaphy.2016.12.018	Sarafi, Eleana	Therios, Ioannis	5	0	1	1	0	0	0	0	0	0	0	0	0	0	0	0	0	0	0	0	0	0	0	0	0	0	0	0	0	0	0	0	0	0	0	0	0	0	0	0	0	0
Comprehensive transcriptional and functional analyses of melatonin synthesis genes in cassava reveal their novel role in hypersensitive-like cell death	Wei, Yunxie; Hu, Wei; Wang, Qiannan; Liu, Wei; Wu, Chunjie; Zeng, Hongqiu; Yan, Yu; Li, Xiaolin; He, Chaozu; Shi, Haitao	Melatonin is a widely known hormone in animals. Since melatonin was discovered in plants, more and more studies highlight its involvement in a wide range of physiological processes including plant development and stress responses. Many advances have been made in the terms of melatonin-mediated abiotic stress resistance and innate immunity in plants, focusing on model plants such as rice and Arabi…	SCIENTIFIC REPORTS	2016	10.1038/srep35029	Wei, Yunxie	Shi, Haitao	10	0	1	1	0	0	0	0	0	0	0	0	0	0	0	0	0	0	0	0	0	0	0	0	0	0	1	0	0	0	0	0	0	0	0	0	0	0	0	0	0	0
Effect of Cultivar, Temperature, and Environmental Conditions on the Dynamic Change of Melatonin in Mulberry Fruit Development and Wine Fermentation	Wang, Cheng; Yin, Li-Yuan; Shi, Xue-Ying; Xiao, Hua; Kang, Kun; Liu, Xing-Yan; Zhan, Ji-Cheng; Huang, Wei-Dong	High levels of melatonin have been reported in various foods but not in mulberry or its wine. This study investigated the dynamic changes of melatonin levels during mulberry fruit development and ethanol fermentation of 2 different coloredmulberry cultivars (Hongguo2 Morus nigra, black and Baiyuwang Morus alba, white) at 2 fermentation temperatures (16 and 25 degrees C). Our results showed that t…	JOURNAL OF FOOD SCIENCE	2016	10.1111/1750-3841.13263	Wang, Cheng	Huang, Wei-Dong	8	0	0	0	0	0	0	0	0	0	0	0	0	0	0	0	0	0	0	0	0	0	0	0	0	0	0	0	0	0	0	0	0	0	0	0	0	0	0	0	0	0
The levels of melatonin and its metabolites in conditioned corn (Zea mays L.) and cucumber (Cucumis sativus L.) seeds during storage	Kolodziejczyk, Izabela; Balabusta, Marta; Szewczyk, Rafal; Posmyk, Malgorzata M.	The efficiency of pre-sowing conditioning/priming methods used to apply melatonin into seeds was verified: osmopriming in the case of dicot Cucumis sativus and hydropriming of monocot Zea mays seeds. Both priming techniques were selected experimentally as optimal for the studied plant species. Four different seed variants were compared: control non-treated ones, and seeds conditioned with water o…	ACTA PHYSIOLOGIAE PLANTARUM	2015	10.1007/s11738-015-1850-7	Kolodziejczyk, Izabela	Posmyk, Malgorzata M.	4	0	1	1	1	1	0	0	0	0	0	0	0	0	0	0	0	0	0	0	0	0	0	0	0	0	0	0	0	0	0	0	0	0	0	0	0	0	0	0	0	0
Melatonin Alleviates Copper Toxicity via Improving Copper Sequestration and ROS Scavenging in Cucumber	Cao, Yun-Yun; Qi, Chuan-Dong; Li, Shuangtao; Wang, Zhirong; Wang, Xiaoyun; Wang, Jinfang; Ren, Shuxin; Li, Xingsheng; Zhang, Na; Guo, Yang-Dong	Melatonin plays an important role in stress tolerance in plants. In this study, exogenous melatonin significantly alleviated the dwarf phenotype and inhibited the decrease of plant fresh weight induced by excess copper (Cu2+). Our results indicated that melatonin alleviated Cu2+ toxicity by improving Cu2+ sequestration, carbon metabolism and ROS (reactive oxygen species) scavenging, rather than b…	PLANT AND CELL PHYSIOLOGY	2019	10.1093/pcp/pcy226	Cao, Yun-Yun	Guo, Yang-Dong	10	0	0	0	1	0	0	0	0	0	0	0	0	0	0	0	0	0	0	0	0	0	0	1	0	1	0	0	0	0	0	0	0	0	0	0	0	0	0	0	0	0
Spermidine and Melatonin Attenuate Fluoride Toxicity by Regulating Gene Expression of Antioxidants in Cajanus cajan L.	Yadu, Bhumika; Chandrakar, Vibhuti; Meena, Rakesh Kumar; Poddar, Aditi; Keshavkant, S.	Being regulators of growth, both spermidine (Spd) and melatonin (Mel) are involved actively in the modulation of abiotic stress responses of plants. Hence, the present study was aimed to scrutinize the possible involvements of Spd and Mel in alleviation of fluoride ion (F-)-induced injuries in Cajanus cajan L. Seeds of C. cajan L. were exposed to 1) control, 2) F-, 3) Spd, 4) Spd+F-, 5) Mel and 6…	JOURNAL OF PLANT GROWTH REGULATION	2018	10.1007/s00344-018-9786-y	Yadu, Bhumika	Keshavkant, S.	5	0	0	0	1	1	0	0	0	0	0	0	0	0	0	0	0	0	0	0	0	0	0	0	1	0	0	1	1	0	0	0	0	0	0	0	0	0	0	0	0	0
Melatonin alleviates low-sulfur stress by promoting sulfur homeostasis in tomato plants	Hasan, Md Kamrul; Liu, Chen-Xu; Pan, Yan-Ting; Ahammed, Golam Jalal; Qi, Zhen-Yu; Zhou, Jie	Despite involvement of melatonin (MT) in plant growth and stress tolerance, its role in sulfur (S) acquisition and assimilation remains unclear. Here we report that low-S conditions cause serious growth inhibition by reducing chlorophyll content, photosynthesis and biomass accumulation. S deficiency evoked oxidative stress leading to the cell structural alterations and DNA damage. In contrast, MT…	SCIENTIFIC REPORTS	2018	10.1038/s41598-018-28561-0	Hasan, Md Kamrul	Zhou, Jie	6	0	0	0	0	0	0	0	0	0	0	0	0	0	0	0	0	0	0	0	0	0	0	1	0	0	0	0	0	0	0	0	0	0	1	0	0	0	0	0	0	0
Melatonin Induces Parthenocarpy by Regulating Genes in Gibberellin Pathways of 'Starkrimson' Pear (Pyrus communis L.)	Liu, Jianlong; Zhai, Rui; Liu, Fengxia; Zhao, Yingxiao; Wang, Huibin; Liu, Lulu; Yang, Chengquan; Wang, Zhigang; Ma, Fengwang; Xu, Lingfei	Parthenocarpy, the production of seedless fruit without fertilization, has a variety of valuable qualities, especially for self-incompatible species, such as pear. To explore whether melatonin (MT) induces parthenocarpy, we used 'Starkrimson' pear as a material for morphological observations. According to our results, exogenous MT promoted the expansion and division of the mesocarp cells in a man…	FRONTIERS IN PLANT SCIENCE	2018	10.3389/fpls.2018.00946	Liu, Jianlong	Xu, Lingfei	10	0	0	0	1	0	0	0	0	0	0	0	0	0	0	0	0	0	0	0	0	0	0	0	0	0	0	0	0	0	0	0	0	0	0	0	0	0	0	0	1	0
Melatonin Protects Cultured Tobacco Cells against Lead-Induced Cell Death via Inhibition of Cytochrome c Translocation.	Kobylinska, Agnieszka; Reiter, Russel J.; Posmyk, Malgorzata M.	Melatonin was discovered in plants more than two decades ago and, especially in the last decade, it has captured the interests of plant biologists. Beyond its possible participation in photoperiod processes and its role as a direct free radical scavenger as well as an indirect antioxidant, melatonin is also involved in plant defense strategies/reactions. However, the mechanisms that this indoleam…	FRONTIERS IN PLANT SCIENCE	2017	10.3389/fpls.2017.01560	Kobylinska, Agnieszka	Posmyk, Malgorzata M.	3	0	1	1	1	0	0	0	0	0	0	0	0	0	0	0	0	0	0	0	0	0	0	0	0	0	0	0	1	0	0	0	0	0	0	0	0	0	0	0	0	0
Serotonin modulates Arabidopsis root growth via changes in reactive oxygen species and jasmonic acid-ethylene signaling	Pelagio-Flores, Ramon; Francisco Ruiz-Herrera, Leon; Lopez-Bucio, Jose	Serotonin (5-hydroxytryptamine) is a bioactive indoleamine with neurotransmitter function in vertebrates, which represents an emerging signaling molecule in plants, playing key roles in the development and defense. In this study, the role of reactive oxygen species (ROS) and jasmonic acid (JA)-ethylene (Et) signaling in root developmental alterations induced by serotonin was investigated. An Arab…	PHYSIOLOGIA PLANTARUM	2016	10.1111/ppl.12429	Pelagio-Flores, Ramon	Lopez-Bucio, Jose	3	0	0	0	0	0	0	0	0	0	0	0	0	0	0	0	0	0	0	0	0	0	0	0	0	1	0	0	0	0	0	0	0	0	0	0	0	0	0	0	0	0
A new microwave-assisted extraction method for melatonin determination in rice grains	Setyaningsih, W.; Palma, M.; Barroso, C. G.	A new microwave-assisted extraction (MAE) method has been developed for the extraction of melatonin from rice grains. The stability of melatonin under MAE conditions was studied in order to define the working range. The studied analytical conditions for the MAE were temperature (125-175 degrees C), microwave power (500-1000 W). time (5-15 min), solvent (10-90% EtOAc in MeOH), and ratio of solvent…	JOURNAL OF CEREAL SCIENCE	2012	10.1016/j.jcs.2012.02.012	Setyaningsih, W.	Barroso, C. G.	3	0	0	1	0	0	0	0	0	0	0	0	0	0	0	0	0	0	0	0	0	0	0	0	0	0	0	0	0	0	0	0	0	0	0	0	0	0	0	0	0	0
Endogenous profiles of indoleamines: serotonin and melatonin in different tissues of Coffea canephora P ex Fr. as analyzed by HPLC and LC-MS-ESI	Ramakrishna, Akula; Giridhar, Parvatam; Sankar, Kadimi Udaya; Ravishankar, Gokare Aswathanarayana	Endogenous indoleamine profiles in various ex vitro and in vitro tissues of commercially important Coffea canephora were analyzed by using a high performance liquid chromatography and further confirmed with electrospray ionization mass spectrometry. High content of serotonin (SER) (98.54 +/- A 5 mu g/g) and melatonin (MEL) (115.25 +/- A 6 mu g/g) were found in freshly harvested seeds of C. caneph…	ACTA PHYSIOLOGIAE PLANTARUM	2012	10.1007/s11738-011-0829-2	Ramakrishna, Akula	Ravishankar, Gokare Aswathanarayana	4	0	0	1	0	1	0	0	0	0	0	0	0	0	0	0	0	0	0	0	0	0	0	0	0	0	0	0	0	0	0	0	0	0	0	0	0	0	0	0	0	0
Melatonin regulates the functional components of photosynthesis, antioxidant system, gene expression, and metabolic pathways to induce drought resistance in grafted Carya cathayensis plants	Sharma, Anket; Wang, Junfeng; Xu, Dongbin; Tao, Shenchen; Chong, Sunli; Yan, Daoliang; Li, Zhen; Yuan, Huwei; Zheng, Bingsong	The Chinese hickory (Carya cathayensis) is an economically important tree species popular for its nuts. However, the tree requires a long time to reach the nut-producing phase. To overcome this problem, grafting is widely used to reduce the time from the vegetative to the reproductive phase. This tree species also faces many environmental challenges due to climate change; drought is an important …	SCIENCE OF THE TOTAL ENVIRONMENT	2020	10.1016/j.scitotenv.2020.136675	Sharma, Anket	Zheng, Bingsong	9	0	0	0	1	0	0	0	0	0	0	0	0	0	0	0	0	0	0	0	0	0	0	1	1	0	0	0	1	0	0	1	0	0	1	1	0	0	0	1	0	0
Seed priming with melatonin coping drought stress in rapeseed by regulating reactive oxygen species detoxification: Antioxidant defense system, osmotic adjustment, stomatal traits and chloroplast ultrastructure perseveration	Khan, Mohammad Nauman; Zhang, Jing; Luo, Tao; Liu, Jiahuan; Rizwan, Muhammad; Fahad, Shah; Xu, Zhenghua; Hu, Liyong	Water stress encumbers the rapeseed growth and development primarily by oxidative alteration to biological membranes and interrupted tissue water status. Seedling tolerance to water stress is vital for better crop development through the entire period under drought stress condition. The enhancement of plant stress tolerance due to melatonin application is already known; however, the specific unde…	INDUSTRIAL CROPS AND PRODUCTS	2019	10.1016/j.indcrop.2019.111597	Khan, Mohammad Nauman	Hu, Liyong	8	0	1	0	0	0	0	0	0	0	0	0	0	0	0	0	0	0	0	0	0	0	0	0	1	1	1	0	0	0	0	0	0	0	1	0	0	0	0	0	0	0
Flavonoids inhibit both rice and sheep serotonin N-acetyltransferases and reduce melatonin levels in plants	Lee, Kyungjin; Hwang, Ok Jin; Reiter, Russel J.; Back, Kyoungwhan	The plant melatonin biosynthetic pathway has been well characterized, but inhibitors of melatonin synthesis have not been well studied. Here, we found that flavonoids potently inhibited plant melatonin synthesis. For example, flavonoids including morin and myricetin significantly inhibited purified, recombinant sheep serotonin N-acetyltransferase (SNAT). Flavonoids also dose-dependently and poten…	JOURNAL OF PINEAL RESEARCH	2018	10.1111/jpi.12512	Lee, Kyungjin	Back, Kyoungwhan	4	0	0	0	0	0	1	0	0	0	0	0	0	0	0	0	0	0	0	0	0	0	0	0	0	0	0	0	0	0	0	0	0	0	0	0	0	0	0	0	0	0
Proteomic analysis of melatonin-mediated osmotic tolerance by improving energy metabolism and autophagy in wheat (Triticum aestivum L.)	Cui, Guibin; Sun, Fengli; Gao, Xinmei; Xie, Kunliang; Zhang, Chao; Liu, Shudong; Xi, Yajun	Melatonin-mediated osmotic tolerance was attributed to increased antioxidant capacity, energy metabolism, osmoregulation and autophagy in wheat (Triticum aestivum L.). Melatonin is known to play multiple roles in plant abiotic stress tolerance. However, its role in wheat has been rarely investigated. In this study, 25% polyethylene glycol 6000 (PEG 6000) was used to simulate osmotic stress, and w…	PLANTA	2018	10.1007/s00425-018-2881-2	Cui, Guibin	Xi, Yajun	7	0	0	0	0	0	0	0	0	0	0	0	0	0	0	0	0	0	0	0	0	0	0	1	0	0	1	0	0	0	0	0	0	0	0	0	0	0	0	0	0	0
Melatonin significantly influences seed germination and seedling growth of Stevia rebaudiana Bertoni	Simlat, Magdalena; Ptak, Agata; Skrzypek, Edyta; Warchol, Marzena; Moranska, Emilia; Piorkowska, Ewa	Background. Melatonin (MEL) is a signaling molecule in plants that affects developmental processes during vegetative and reproductive growth. Investigations have proved that exogenously applied MEL also has the potential to improve seed germination and plant development. Methods. In the present study, seeds of stevia, a species with a very low germination rate, were germinated on an agar gel (AG)…	PEERJ	2018	10.7717/peerj.5009	Simlat, Magdalena	Piorkowska, Ewa	6	1	1	1	1	0	0	0	0	0	0	0	0	0	0	0	0	0	0	0	0	0	0	0	0	0	0	0	1	0	0	0	0	0	0	0	0	0	0	0	0	0
Crosstalk between calcium and melatonin affects postharvest physiological deterioration and quality loss in cassava	Hu, Wei; Tie, Weiwei; Ou, Wenjun; Yan, Yan; Kong, Hua; Zuo, Jiao; Ding, Xupo; Ding, Zehong; Liu, Yang; Wu, Chunlai; Guo, Yunling; Shi, Haitao; Li, Kaimian; Guo, Anping	Rapid postharvest physiological deterioration largely reduces the quality and marketability of cassava. The molecular mechanism underlying cassava postharvest physiological deterioration and quality loss is largely unknown. The present study aimed to investigate the role of calcium and its relationship with melatonin in cassava postharvest physiological deterioration. Transcriptomic analyses indi…	POSTHARVEST BIOLOGY AND TECHNOLOGY	2018	10.1016/j.postharvbio.2018.02.007	Hu, Wei	Guo, Anping	14	0	1	1	1	1	0	0	0	0	0	0	0	0	0	0	0	0	0	0	0	0	0	0	0	1	0	0	0	0	0	0	0	0	0	0	0	0	0	0	0	0
Effects of Exogenous Melatonin on Methyl Viologen-Mediated Oxidative Stress in Apple Leaf	Wei, Zhiwei; Gao, Tengteng; Liang, Bowen; Zhao, Qi; Ma, Fengwang; Li, Chao	Oxidative stress is a major source of damage of plants exposed to adverse environments. We examined the effect of exogenous melatonin (MT) in limiting of oxidative stress caused by methyl viologen (MV; paraquatin) in apple leaves (Malus domestica Borkh.). When detached leaves were pre-treated with melatonin, their level of stress tolerance increased. Under MV treatment, melatonin effectively alle…	INTERNATIONAL JOURNAL OF MOLECULAR SCIENCES	2018	10.3390/ijms19010316	Wei, Zhiwei	Li, Chao	6	0	1	1	1	0	0	0	0	0	0	0	0	0	0	0	0	0	0	0	0	0	0	0	0	0	0	0	1	0	0	0	0	0	1	0	0	0	0	0	0	0
Multiresponse optimization of a UPLC method for the simultaneous determination of tryptophan and 15 tryptophan-derived compounds using a Box-Behnken design with a desirability function	Setyaningsih, Widiastuti; Saputro, Irfan E.; Carrera, Ceferino A.; Palma, Miguel; Barroso, Carmelo G.	A Box-Behnken design was used in conjunction with multiresponse optimization based on the desirability function to carry out the simultaneous separation of tryptophan and 15 derivatives by Ultra Performance Liquid Chromatography. The gradient composition of the mobile phase and the flow rate were optimized with respect to the resolution of severely overlapping chromatographic peaks and the total …	FOOD CHEMISTRY	2017	10.1016/j.foodchem.2016.12.034	Setyaningsih, Widiastuti	Barroso, Carmelo G.	5	0	0	0	0	0	0	0	0	0	0	0	0	0	0	0	0	0	0	0	0	0	0	0	0	0	0	0	0	0	0	0	0	0	0	0	0	0	0	0	0	0
Endophytic Bacterium Pseudomonas fluorescens RG11 May Transform Tryptophan to Melatonin and Promote Endogenous Melatonin Levels in the Roots of Four Grape Cultivars	Ma, Yaner; Jiao, Jian; Fan, Xiucai; Sun, Haisheng; Zhang, Ying; Jiang, Jianfu; Liu, Chonghuai	Endophytes have been verified to synthesize melatonin in vitro and promote abiotic stress-induced production of endogenous melatonin in grape (Vitis vinifera L.) roots. This study aimed to further characterize the biotransformation of tryptophan to melatonin in the endophytic bacterium Pseudomonas fluorescens RG11 and to investigate its capacity for enhancing endogenous melatonin levels in the ro…	FRONTIERS IN PLANT SCIENCE	2017	10.3389/fpls.2016.02068	Ma, Yaner	Liu, Chonghuai	7	0	1	1	0	1	0	0	0	0	0	0	0	0	0	0	0	0	0	0	0	0	0	0	0	0	0	0	0	0	0	0	0	0	0	0	0	0	0	0	0	0
Melatonin in Plants and Plant Culture Systems: Variability, Stability and Efficient Quantification	Erland, Lauren A. E.; Chattopadhyay, Abhishek; Jones, Andrew Maxwell P.; Saxena, Praveen K.	Despite growing evidence of the importance of melatonin and serotonin in the plant life, there is still much debate over the stability of melatonin, with extraction and analysis methods varying greatly from lab to lab with respect to time, temperature, light levels, extraction solvents, and mechanical disruption. The variability in methodology has created conflicting results that confound the com…	FRONTIERS IN PLANT SCIENCE	2016	10.3389/fpls.2016.01721	Erland, Lauren A. E.	Saxena, Praveen K.	4	0	1	1	0	0	0	0	0	0	0	0	0	0	0	0	0	0	0	0	0	0	0	0	0	0	0	0	0	0	0	0	0	0	0	0	0	0	0	0	0	0
Identification and characterization of serotonin as an anti-browning compound of apple and pear	Bajwa, Vikramjit S.; Shukla, Mukund R.; Sherif, Sherif M.; Murch, Susan J.; Saxena, Praveen K.	Serotonin (5-hydroxytryptamine) is an indoleamine with important physiological functions in plants, including developmental processes and stress responses. In this study, a simple and rapid bioassay was developed to investigate the inhibition of the fruit browning enzyme, polyphenol oxidase (PPO) via serotonin, employing cut apple discs as well as apple tissue homogenate treated with serotonin. T…	POSTHARVEST BIOLOGY AND TECHNOLOGY	2015	10.1016/j.postharvbio.2015.08.018	Bajwa, Vikramjit S.	Saxena, Praveen K.	5	0	0	0	0	0	0	0	0	0	0	0	0	0	0	0	0	0	0	0	0	0	0	0	0	0	0	0	0	0	0	0	0	0	0	0	0	0	0	0	0	0
Impact of Melatonin Enrichment during Germination of Legumes on Bioactive Compounds and Antioxidant Activity	Aguilera, Yolanda; Herrera, Teresa; Liebana, Rosa; Rebollo-Hernanz, Miguel; Sanchez-Puelles, Carlos; Martin-Cabrejas, Maria A.	This study assesses the impact of melatonin enriched watering on the germination of lentils (Lens culinaris L.) and kidney beans (Phaseolus vulgaris L.). The melatonin levels in lentil and bean sprouts measured by HPLC-MS/MS were more important than those found in other legumes and sprouts, being higher in lentil (1090 ng/g) than in kidney bean (529 ng/g) sprouts. This alternative germination pro…	JOURNAL OF AGRICULTURAL AND FOOD CHEMISTRY	2015	10.1021/acs.jafc.5b03128	Aguilera, Yolanda	Martin-Cabrejas, Maria A.	6	0	0	0	0	0	0	0	0	0	0	0	0	0	0	0	0	0	0	0	0	0	0	0	1	0	0	0	0	0	0	0	0	0	0	0	0	0	0	0	0	0
Melatonin treatment inhibits gray mold and induces disease resistance in cherry tomato fruit during postharvest	Li, Sheng-e; Xu, Yanhong; Bi, Yang; Zhang, Bo; Shen, Shuling; Jiang, Tianjia; Zheng, Xiaolin	Melatonin, an indolic compound, is a ubiquitous molecule with pleiotropic roles in plant. The effects of melatonin treatment on the development of gray mold, disease resistance signals and phenylpropanoid pathway in cherry tomato were investigated after the mature-green fruit were dipped in 0.1 mM melatonin for 60 min and subsequently stored at 22 +/- 1 degrees C. The results showed that melatoni…	POSTHARVEST BIOLOGY AND TECHNOLOGY	2019	10.1016/j.postharvbio.2019.110962	Li, Sheng-e	Zheng, Xiaolin	7	0	0	0	0	1	0	0	0	0	0	0	0	0	0	0	0	0	0	0	0	0	0	0	0	0	0	0	0	0	0	0	0	0	0	0	0	0	0	0	0	1
Foliar spraying of melatonin confers cadmium tolerance in Nicotiana tabacum L	Wang, Meng; Duan, Shuhui; Zhou, Zhicheng; Chen, Shibao; Wang, Duo	Melatonin is a multifunctional signaling molecule that regulates broad aspects of responses to environmental stresses in plants. Cadmium (Cd) is a persistent soil contaminant that is toxic to all living organisms. Recent reports have uncovered the protective role of melatonin in alleviating Cd phytotoxicity, but little is known about its regulatory mechanisms in plants. In this study, we found th…	ECOTOXICOLOGY AND ENVIRONMENTAL SAFETY	2019	10.1016/j.ecoenv.2018.11.127	Wang, Meng	Wang, Duo	5	0	0	0	0	0	0	0	0	0	0	0	0	0	0	0	0	0	0	0	0	0	0	0	0	0	0	0	0	0	0	0	0	0	0	0	0	0	0	0	0	0
Interactive Effects of Light and Melatonin on Biosynthesis of Silymarin and Anti-Inflammatory Potential in Callus Cultures of Silybum marianum (L.) Gaertn.	Shah, Muzamil; Ullah, Muhammad Asad; Drouet, Samantha; Younas, Muhammad; Tungmunnithum, Duangjai; Giglioli-Guivarc'h, Nathalie; Hano, Christophe; Abbasi, Bilal Haider	Silybum marianum (L.) Gaertn. is a well-known medicinal herb, primarily used in liver protection. Light strongly affects several physiological processes along with secondary metabolites biosynthesis in plants. Herein, S. marianum was exploited for in vitro potential under different light regimes in the presence of melatonin. The optimal callogenic response occurred in the combination of 1.0 mg/L …	MOLECULES	2019	10.3390/molecules24071207	Shah, Muzamil	Abbasi, Bilal Haider	8	0	1	0	0	0	0	0	0	0	0	0	0	0	0	0	0	0	0	0	0	0	0	0	0	0	0	0	0	0	0	0	1	0	0	0	0	0	0	0	0	0
Melatonin-Mediated Regulation of Growth and Antioxidant Capacity in Salt-Tolerant Naked Oat under Salt Stress	Gao, Wenying; Feng, Zheng; Bai, Qingqing; He, Jinjin; Wang, Yingjuan	Melatonin (MT; N-acetyl-5-methoxytryptamine) is a pleiotropic signaling molecule that has been demonstrated to play an important role in plant growth, development, and regulation of environmental stress responses. Studies have been conducted on the role of the exogenous application of MT in a few species, but the potential mechanisms of MT-mediated stress tolerance under salt stress are still lar…	INTERNATIONAL JOURNAL OF MOLECULAR SCIENCES	2019	10.3390/ijms20051176	Gao, Wenying	Wang, Yingjuan	5	0	1	0	1	0	0	0	0	0	0	0	0	0	0	0	0	0	0	0	0	0	0	0	1	0	1	1	1	0	0	0	0	0	1	0	0	0	0	0	0	0
Melatonin-deficient rice plants show a common semidwarf phenotype either dependent or independent of brassinosteroid biosynthesis	Lee, Kyungjin; Back, Kyoungwhan	Melatonin-deficient rice with a semidwarf erect-leaf phenotype was created by suppressing serotonin N-acetyltransferase 2 (SNAT2). We generated an RNAi transgenic rice that suppressed tryptophan decarboxylase (TDC), which encodes the first TDC enzyme committed step for melatonin biosynthesis in plants catalyzing the conversion of tryptophan into tryptamine, to determine whether other transgenic r…	JOURNAL OF PINEAL RESEARCH	2019	10.1111/jpi.12537	Lee, Kyungjin	Back, Kyoungwhan	2	0	0	0	0	0	1	0	0	0	0	0	0	0	0	0	0	0	0	0	0	0	0	0	0	0	0	0	0	0	0	0	0	0	0	0	0	0	0	0	0	0
Foliar application of melatonin induces tolerance to drought stress in Moldavian balm plants (Dracocephalum moldavica) through regulating the antioxidant system	Kabiri, Rozita; Hatami, Ali; Oloumi, Hakimeh; Naghizadeh, Mehdi; Nasibi, Fatemeh; Tahmasebi, Zahra	Melatonin, as an indoleamine molecule, regulates a wide range of physiological functions during the growth, morphogenesis and response of plants to biotic and abiotic stresses. In this research, the effect of exogenous application of melatonin (0 (distilled water), 50, 100 and 150 mu M) to the leaves of Moldavian balm plants grown under different levels of drought stress (100% (control), 80%, 60%…	FOLIA HORTICULTURAE	2018	10.2478/fhort-2018-0016	Kabiri, Rozita	Tahmasebi, Zahra	6	0	0	0	1	0	0	0	0	0	0	0	0	0	0	0	0	0	0	0	0	0	0	0	1	0	1	1	1	0	0	0	0	0	1	0	0	0	0	0	0	0
Melatonin redirects carbohydrates metabolism during sugar starvation in plant cells	Kobylinska, Agnieszka; Borek, Slawomir; Posmyk, Malgorzata M.	Recent studies have shown that melatonin is an important molecule in plant physiology. It seems that the most important is that melatonin efficacy eliminates oxidative stress (direct and indirect antioxidant) and moreover induce plant stress reaction and switch on different defence strategies (preventively and interventively actions). In this report, the impact of exogenous melatonin on carbohydr…	JOURNAL OF PINEAL RESEARCH	2018	10.1111/jpi.12466	Kobylinska, Agnieszka	Posmyk, Malgorzata M.	3	0	0	0	1	0	0	0	0	0	0	0	0	0	0	0	0	0	0	0	0	0	0	1	0	0	0	0	0	0	0	0	0	1	0	0	0	0	0	0	0	0
Solid phase extraction/cyclodextrin-modified micellar electrokinetic chromatography for the analysis of melatonin and related indole compounds in plants	Gomez, Federico J. V.; Gatica Hernandez, Ismael; Cerutti, Soledad; Silva, Maria F.	The identification of melatonin in plants has inspired new investigations to understand its biological function. In this work, a robust, reliable, low-cost, quick and simple method based on solid phase extraction followed by micellar electrokinetic chromatography for the extraction, preconcentration and simultaneous determination of melatonin, tryptophan, serotonin and indole-3-acetic add in plan…	MICROCHEMICAL JOURNAL	2015	10.1016/j.microc.2015.05.013	Gomez, Federico J. V.	Silva, Maria F.	4	0	0	0	0	0	0	0	0	0	0	0	0	0	0	0	0	0	0	0	0	0	0	0	0	0	0	0	0	0	0	0	0	0	0	0	0	0	0	0	0	0
Naturally-occurring tetrahydro-beta-carboline alkaloids derived from tryptophan are oxidized to bioactive beta-carboline alkaloids by heme peroxidases	Herraiz, Tomas; Galisteo, Juan	beta-Carbolines are indole alkaloids that occur in plants, foods, and endogenously in mammals and humans, and which exhibit potent biological, psychopharmacological and toxicological activities. They form from naturally-occurring tetrahydro-beta-carboline alkaloids arising from tryptophan by still unknown way and mechanism. Results in this research show that heme peroxidases catalyzed the oxidati…	BIOCHEMICAL AND BIOPHYSICAL RESEARCH COMMUNICATIONS	2014	10.1016/j.bbrc.2014.07.047	Herraiz, Tomas	Galisteo, Juan	2	0	0	0	0	1	0	0	0	0	0	0	0	0	0	0	0	0	0	0	0	0	0	0	0	0	1	0	0	0	0	0	0	0	0	0	0	0	0	0	0	0
Targeted and Untargeted Phytochemistry of Ligusticum canbyi: Indoleamines, Phthalides, Antioxidant Potential, and Use of Metabolomics as a Hypothesis-Generating Technique for Compound Discovery	Turi, Christina E.; Murch, Susan J.	Ligusticum canbyi (J.M. Coult & Rose) is a medicinal understory forest species used in traditional rituals and ceremonies for spiritual enlightenment and improved mental health. Very little is known about the phytochemical complexity or diversity of L.canbyi tissues or extracts. The current study was undertaken to determine whether Ligusticum tissues and extracts contain specifically targeted bio…	PLANTA MEDICA	2013	10.1055/s-0033-1350618	Turi, Christina E.	Murch, Susan J.	2	1	0	0	0	0	0	0	0	0	0	0	0	0	0	0	0	0	0	0	0	0	0	0	1	0	0	0	0	0	0	0	0	0	0	0	0	0	0	0	0	0
Melatonin promotes plant growth by increasing nitrogen uptake and assimilation under nitrogen deficient condition in winter wheat	Qiao, Yujie; Yin, Lina; Wang, Bomei; Ke, Qingbo; Deng, Xiping; Wang, Shiwen	Melatonin (MEL) has been widely reported to be beneficial to plant growth and development, but few studies have combined investigations of the performance and function of MEL with detailed physiologically based analyses of nitrogen (N) uptake and metabolism in staple crops. In this study, the effect of MEL application on winter wheat seedling growth and grain yield were investigated in hydroponic…	PLANT PHYSIOLOGY AND BIOCHEMISTRY	2019	10.1016/j.plaphy.2019.03.037	Qiao, Yujie	Wang, Shiwen	6	0	0	0	0	0	0	0	0	0	0	0	0	0	0	0	0	0	0	0	0	0	0	1	0	0	0	0	0	0	0	0	0	0	0	0	0	0	0	0	0	0
Melatonin induction and its role in high light stress tolerance in Arabidopsis thaliana	Lee, Hyoung Yool; Back, Kyoungwhan	In plants, melatonin is a potent bioactive molecule involved in the response against various biotic and abiotic stresses. However, little is known of its defensive role against high light (HL) stress. In this study, we found that melatonin was transiently induced in response to HL stress in Arabidopsis thaliana with a simultaneous increase in the expression of melatonin biosynthetic genes, includ…	JOURNAL OF PINEAL RESEARCH	2018	10.1111/jpi.12504	Lee, Hyoung Yool	Back, Kyoungwhan	2	0	1	1	1	0	0	0	0	0	0	0	0	0	0	0	0	0	0	0	0	0	0	0	0	0	0	1	0	0	0	0	1	0	0	0	0	0	0	0	0	0
Melatonin affects the growth and cadmium accumulation of Malachium aquaticum and Galinsoga parviflora	Tang, Yi; Lin, Lijin; Xie, Yongdong; Liu, Ji; Sun, Guochao; Li, Huanxiu; Liao, Ming'an; Wang, Zhihui; Liang, Dong; Xia, Hui; Wang, Xun; Zhang, Jing; Liu, Zejing; Huang, Zhi; He, Zhongqun; Tu, Lihua	Phytoremediation technology has become one of the main techniques for remediating soils polluted by heavy metals because it does not damage the environment, but heavy metal-tolerant plants have the disadvantages of low biomass and slow growth. A pot experiment was conducted to study the effects of melatonin (Mel) on growth and cadmium (Cd) accumulation in the Cd accumulator Malachium aquaticum an…	INTERNATIONAL JOURNAL OF PHYTOREMEDIATION	2018	10.1080/15226514.2017.1374341	Tang, Yi	Tu, Lihua	16	0	0	0	0	0	0	0	0	0	0	0	0	0	0	0	0	0	0	0	0	0	0	0	0	0	0	0	0	0	0	0	0	0	0	0	0	0	0	0	0	0
Cadmium Disrupts Subcellular Organelles, Including Chloroplasts, Resulting in Melatonin Induction in Plants	Lee, Hyoung-Yool; Back, Kyoungwhan	Cadmium is a well-known elicitor of melatonin synthesis in plants, including rice. However, the mechanisms by which cadmium induces melatonin induction remain elusive. To investigate whether cadmium influences physical integrities in subcellular organelles, we treated tobacco leaves with either CdCl2 or AlCl3 and monitored the structures of subcellular organelles-such as chloroplasts, mitochondri…	MOLECULES	2017	10.3390/molecules22101791	Lee, Hyoung-Yool	Back, Kyoungwhan	2	0	0	0	0	0	0	0	0	0	0	0	0	0	0	0	0	0	0	0	0	0	0	0	0	0	0	0	0	0	0	0	0	0	0	0	0	0	0	0	0	0
Isolation and characterization of MdATG18 alpha, a WD40-repeat AuTophaGy-related gene responsive to leaf senescence and abiotic stress in Malus	Wang, Ping; Sun, Xun; Yue, Zhiyong; Liang, Dong; Wang, Na; Ma, Fengwang	Autophagy is an important means for recycling damaged cell components or degrading various proteins when plants are under starvation or oxidative stress. AuTophaGy-related gene 18 (ATG18), a phosphoinositide-binding protein that functions through the WD40 domain, is required for vesicle formation in autophagy. Here, we isolated and characterized MdATG18a from Malus domestica. Its full-length cDNA…	SCIENTIA HORTICULTURAE	2014	10.1016/j.scienta.2013.10.038	Wang, Ping	Ma, Fengwang	6	0	0	0	0	0	0	0	0	0	0	0	0	0	0	0	0	0	0	0	0	0	0	0	0	0	0	0	0	0	0	0	0	0	0	0	0	0	1	0	0	0
Insights into the metabolism of membrane lipid fatty acids associated with chilling injury in post-harvest bell peppers	Ge, Wanying; Kong, Ximan; Zhao, Yingbo; Wei, Baodong; Zhou, Qian; Ji, Shujuan	Bell peppers are susceptible to chilling injury (CI). To uncover the metabolism of membrane lipid fatty acids (FAs) accompanying CI, a gas chromatography-mass spectrometry (GC-MS)-based approach was used to quantitatively profile major membrane lipid FAs in bell peppers. RT-qPCR was performed to investigate the expression of the key genes that regulate the synthesis of unsaturated FAs. Additional…	FOOD CHEMISTRY	2019	10.1016/j.foodchem.2019.05.117	Ge, Wanying	Ji, Shujuan	6	0	0	0	0	0	0	0	0	0	0	0	0	0	0	0	0	0	0	0	0	0	0	1	0	0	0	0	0	0	0	0	0	0	0	0	0	0	0	0	0	0
Simultaneous Determination of Melatonin, l-Tryptophan, and two l-Tryptophan-Derived Esters in Food by HPLC with Graphene Oxide/SiO2 Nanocomposite as the Adsorbent	Niu, Jiahua; Zhang, Xiaoting; Qin, Peige; Yang, Yixin; Tian, Shufang; Yang, Hui; Lu, Minghua	In this research, a dispersive solid-phase extraction (dSPE) with graphene oxide@SiO2 (GO@SiO2) nanocomposites as the adsorbent followed by high-performance liquid chromatography analysis was developed for simultaneous determination of melatonin, l-tryptophan, and two l-tryptophan-derived esters in food (black sesame seed (Sesamum indicum L.) was selected in this case). The GO@SiO2 nanocomposite …	FOOD ANALYTICAL METHODS	2018	10.1007/s12161-018-1213-2	Niu, Jiahua	Lu, Minghua	7	0	1	0	0	0	0	0	0	0	0	0	0	0	0	0	0	0	0	0	0	0	0	0	0	0	0	0	0	0	0	0	0	0	0	0	0	0	0	0	0	0
Melatonin Treatment Enhances the Polyphenol Content and Antioxidant Capacity of Red Wine	Xu Lili	Melatonin and polyphenols are strong antioxidants, and melatonin is also a potential plant growth regulator. The role of melatonin in regulating polyphenol metabolism is unclear. This study assessed the primary impacts of exogenous melatonin treatment on phenolics accumulation and antioxidant capacity of the 'Moldova' wine. It was found that two times of 100 mu mol.L-1 melatonin treatment clearly…	HORTICULTURAL PLANT JOURNAL	2018	10.1016/j.hpj.2018.05.004	Xu Lili	Yao Yuxin	5	0	0	0				0	0	0	0	0	0	0	0	0	0	0	0	0	0	0	0	1	0	0	0	0	0	0	0	0	0	0	0	0	0	1		0	0	0
Effects of melatonin on photosynthetic performance and antioxidants in melon during cold and recovery	Zhang, Y. P.; Yang, S. J.; Chen, Y. Y.	Melatonin (MT), a tryptophan derivative, plays an important role in the function and survival of organisms. To better understand the role of MT in cold tolerance, the melon (Cucumis melo L.) were sprayed with various concentrations of MT (0, 50, 100, 200 or 400 mu M), exposed to cold stress (day/night temperature of 12/6 A degrees C) for 7 d, and then returned to optimal conditions (28/18 A degre…	BIOLOGIA PLANTARUM	2017	10.1007/s10535-017-0717-8	Zhang, Y. P.	Chen, Y. Y.	3	0	0	0	0	0	0	0	0	0	0	0	0	0	0	0	0	0	0	0	0	0	0	0	1	0	0	1	1	0	0	0	0	0	1	0	0	0	0	0	0	0
Examination of the auxin hypothesis of phytomelatonin action in classical auxin assay systems in maize	Kim, Minjae; Seo, Hyesu; Park, Chanwoo; Park, Woong June	Melatonin has been found in a wide range of plant groups. Its physiological roles have been suggested to be diverse in stress protection and plant growth regulation. An attractive hypothesis is that phytomelatonin acts as an auxin to regulate plant development. However, the auxin hypothesis is controversial, since both supporting and contradictory evidence has been reported. We systematically inv…	JOURNAL OF PLANT PHYSIOLOGY	2016	10.1016/j.jplph.2015.11.009	Kim, Minjae	Park, Woong June	4	0	0	0	0	0	0	0	0	0	0	0	0	0	0	0	0	0	0	0	0	0	0	0	0	0	0	0	0	0	0	0	0	0	0	0	0	0	0	0	0	0
Determination of Melatonin in Rice (Oryza sativa) Grains by Pressurized Liquid Extraction	Setyaningsih, Widiastuti; Estiono Saputro, Irfan; Fernandez Barbero, Gerardo; Palma, Miguel; Garcia Barroso, Carmelo	Melatonin provides a number of benefits for human health. The study reported here concerns the optimization, validation, and application of analytical pressurized liquid extraction and high-performance liquid chromatography coupled to a fluorescence detector for the determination of melatonin in rice grains. The factors that are most likely to affect the extraction efficiency were optimized with …	JOURNAL OF AGRICULTURAL AND FOOD CHEMISTRY	2015	10.1021/jf505106m	Setyaningsih, Widiastuti	Garcia Barroso, Carmelo	5	0	0	1	0	0	0	0	0	0	0	0	0	0	0	0	0	0	0	0	0	0	0	0	0	0	0	0	0	0	0	0	0	0	0	0	0	0	0	0	0	0
Melatonin improves bioreductant capacity and silver nanoparticles synthesis using Catharanthus roseus leaves	Sheshadri, S. A.; Sriram, S.; Balamurugan, P.; Anupriya, R.; Princy, S. Adline; Brindha, P.; Bindu, S.	Melatonin is a natural hormone found in a variety of living organisms, including plants, and possesses the potential to act as a growth promoter and stress alleviator. The present study aims in understanding the effect of melatonin in Catharanthus roseus (C. roseus; medicinal plant used in anticancer therapy) leaf extracts for enhanced silver nanoparticle synthesis. Our results indicated that the…	RSC ADVANCES	2015	10.1039/c5ra01848j	Sheshadri, S. A.	Bindu, S.	7	0	0	0	0	0	0	0	0	0	0	0	0	0	0	0	0	0	0	0	0	0	0	0	0	1	0	0	0	0	0	0	0	1	1	0	0	0	0	0	0	0
Involvement of melatonin applied to Vigna radiata L. seeds in plant response to chilling stress	Szafranska, Katarzyna; Szewczyk, Rafal; Janas, Krystyna Maria	The impact of melatonin (50 A mu M L-1) applied to Vigna radiata seeds by hydro-priming on phenolic content, L-phenylalanine ammonialyase (PAL) activity, MEL level, antioxidant properties of ethanol extracts as well as electrolyte leakage from chilled and re-warmed Vigna radiata roots of seedlings were examined. Seedlings obtained from non-primed seeds, hydro-primed and hydro-primed with MEL were…	CENTRAL EUROPEAN JOURNAL OF BIOLOGY	2014	10.2478/s11535-014-0330-1	Szafranska, Katarzyna	Janas, Krystyna Maria	3	0	1	1	0	0	0	0	0	0	0	0	0	0	0	0	0	0	0	0	0	0	0	0	0	0	0	0	0	0	0	0	0	0	0	0	0	0	0	0	0	0
A rice chloroplast transit peptide sequence does not alter the cytoplasmic localization of sheep serotonin N-acetyltransferase expressed in transgenic rice plants	Byeon, Yeong; Lee, Hyoung Yool; Lee, Kyungjin; Back, Kyoungwhan	Ectopic overexpression of melatonin biosynthetic genes of animal origin has been used to generate melatonin-rich transgenic plants to examine the functional roles of melatonin in plants. However, the subcellular localization of these proteins expressed in the transgenic plants remains unknown. We studied the localization of sheep (Ovis aries) serotonin N-acetyltransferase (OaSNAT) and a translati…	JOURNAL OF PINEAL RESEARCH	2014	10.1111/jpi.12151	Byeon, Yeong	Back, Kyoungwhan	4	0	0	0	0	0	1	0	0	0	0	0	0	0	0	0	0	0	0	0	0	0	0	0	0	0	0	0	0	0	0	0	0	0	0	0	0	0	0	0	0	0
The flavonoid myricetin reduces nocturnal melatonin levels in the blood through the inhibition of serotonin N-acetyltransferase	Shin, Jae-Cheon; Jung, Hoe-Yune; Harikishore, Amaravadhi; Kwon, Oh-Deog; Yoon, Ho Sup; Kim, Kyong-Tai; Choi, Bo-Hwa	Melatonin is secreted during the hours of darkness and is thought to influence the circadian and seasonal timing of a variety of physiological processes. AANAT, which is expressed in the pineal gland, retina, and various other tissues, catalyzes the conversion of serotonin to N-acetylserotonin and is the rate-limiting enzyme in the biosynthetic pathway of melatonin. The compounds that modulate th…	BIOCHEMICAL AND BIOPHYSICAL RESEARCH COMMUNICATIONS	2013	10.1016/j.bbrc.2013.09.076	Shin, Jae-Cheon	Choi, Bo-Hwa	7	0	0	0	0	0	0	0	0	0	0	0	0	0	0	0	0	0	0	0	0	0	0	0	0	0	0	0	0	0	0	0	0	0	0	0	0	0	0	0	0	0
Phenolic Content and Antioxidant Capacity of Essential Oil Obtained from Sawdust of Chamaecyparis obtusa by Microwave-Assisted Hydrodistillation	Bajpai, Vivek K.; Sharma, Ajay; Kim, Sung Hong; Baek, Kwang-Hyun	Reactive oxygen species and free radicals play a major role in food deterioration. Current research is directed towards finding naturally occurring antioxidants of plant origin. In the present study, the chemical composition analysis of the essential oil obtained from sawdust of Chamaecyparis obtuse (COEO) was conducted by gas chromatography coupled with mass spectroscopy (GC-MS). Further, the ph…	FOOD TECHNOLOGY AND BIOTECHNOLOGY	2013		Bajpai, Vivek K.	Baek, Kwang-Hyun	4	0	0	0	0	0	0	0	0	0	0	0	0	0	0	0	0	0	0	0	0	0	0	0	1	0	0	0	1	0	0	0	0	0	0	0	0	0	0	0	0	0
Biotinylated indoles as probes for indole-binding proteins	Dolusic, E; Kowalczyk, M; Magnus, V; Sandberg, G; Normanly, J	Biotinylated indoles were prepared for application as bifunctional probes for the detection of indole-binding proteins which participate in the life processes of humans, animals, plants, and bacteria. The indole nucleus was functionalized, at ring positions 3, 5, or 6, by attachment of a 2-aminoethyl group, which was then coupled to the carboxyl moiety of biotin, via a spacer composed of 3 or 4 c…	BIOCONJUGATE CHEMISTRY	2001	10.1021/bc000035o	Dolusic, E	Normanly, J	5	0	0	0	0	0	0	0	0	0	0	0	0	0	0	0	0	0	0	0	0	0	1	0	0	0	0	0	0	0	0	0	0	0	0	0	0	0	0	0	0	0
INFLUENCE OF MELATONIN ON ANTIOXIDANT DEFENSE SYSTEM AND YIELD OF WHEAT (TRITICUM AESTIVUM L.) GENOTYPES UNDER SALINE CONDITION	Zafar, Sara; Hasnain, Zuhair; Anwar, Sumera; Perveen, Shagufta; Iqbal, Naeem; Noman, Ali; Ali, Mohsan	Melatonin (N-acetyl-5-methoxytryptamine) has emerged as a new growth regulator in plants due to its positive role in alleviation of abiotic stresses. The regulation effect of melatonin in mediation of salinity stress on antioxidative activities, growth and yield of wheat plants was investigated using genotypes Sarsabz and S-24, grown under 10 dSm(-1) NaCl salinity stress. Different concentrations…	PAKISTAN JOURNAL OF BOTANY	2019	10.30848/PJB2019-6(5)	Zafar, Sara	Ali, Mohsan	7	0	0	0	0	0	0	0	0	0	0	0	0	0	0	0	0	0	0	0	0	0	0	0	1	0	0	1	1	0	0	0	0	0	0	0	0	0	0	0	0	0
Melatonin treatment promotes endogenous melatonin accumulation and triggers GABA shunt pathway activity in tomato fruits during cold storage	Sharafi, Yavar; Aghdam, Morteza Soleimani; Luo, Zisheng; Jannatizadeh, Abbasali; Razavi, Farhang; Fard, Javad Rezapour; Farmani, Boukaga	Higher H2O2 accumulation in tomato fruits during storage at 4 degrees C for 7 days by melatonin treatment at 100 mu M may serve as signaling molecule for promoting endogenous melatonin accumulation by trigerring melatonin biosynthesis TDC, T5H, SNAT, and ASMT genes expression during storage at 4 degrees C for 28 days. Also, higher GABA shunt pathway activity demonstrating by higher GAD, GABA-T an…	SCIENTIA HORTICULTURAE	2019	10.1016/j.scienta.2019.04.056	Sharafi, Yavar	Farmani, Boukaga	7	0	0	0	0	1	0	0	0	0	0	0	0	0	0	0	0	0	0	0	0	0	0	0	0	0	1	0	0	0	0	0	0	0	0	0	0	0	0	0	0	0
Melatonin decreases resistance to postharvest green mold on citrus fruit by scavenging defense-related reactive oxygen species	Lin, Yunlong; Fan, Liqin; Xia, Xuehan; Wang, Zhongkang; Yin, Youping; Cheng, Yulin; Li, Zhengguo	Melatonin, an important and conserved indoleamine compound, is involved in many plant physiological functions. Postharvest diseases caused by fungal pathogens lead to huge economic losses worldwide, but nothing is currently known about the role of melatonin in fruit resistance to postharvest diseases. Here, we report on the effect of exogenous melatonin treatment of citrus fruit to postharvest gr…	POSTHARVEST BIOLOGY AND TECHNOLOGY	2019	10.1016/j.postharvbio.2019.03.016	Lin, Yunlong	Li, Zhengguo	7	0	1	1	0	0	0	0	0	0	0	0	0	0	0	0	0	0	0	0	0	0	0	1	0	1	1	0	0	0	0	0	0	0	0	0	0	0	0	0	0	0
Effect of Ultraviolet-C Radiation and Melatonin Stress on Biosynthesis of Antioxidant and Antidiabetic Metabolites Produced in In Vitro Callus Cultures of Lepidium sativum L.	Ullah, Muhammad Asad; Tungmunnithum, Duangjai; Garros, Laurine; Drouet, Samantha; Hano, Christophe; Abbasi, Bilal Haider	Lepidium sativum L. is a rich source of polyphenols that have huge medicinal and pharmaceutical applications. In the current study, an effective abiotic elicitation strategy was designed for enhanced biosynthesis of polyphenols in callus culture of L. sativum. Callus was exposed to UV-C radiations for different time intervals and various concentrations of melatonin. Secondary metabolites were qua…	INTERNATIONAL JOURNAL OF MOLECULAR SCIENCES	2019	10.3390/ijms20071787	Ullah, Muhammad Asad	Abbasi, Bilal Haider	6	0	0	0	0	0	0	0	0	0	0	0	0	0	0	0	0	0	0	0	0	0	0	0	1	0	0	0	0	0	0	0	0	1	0	0	0	0	0	0	0	0
Apple tree flowering is mediated by low level of melatonin under the regulation of seasonal light signal	Zhang, Haixia; Wang, Lin; Shi, Kun; Shan, Dongqian; Zhu, Yunpeng; Wang, Chanyu; Bai, Yixue; Yan, Tianci; Zheng, Xiaodong; Kong, Jin	Melatonin regulates the seasonal reproduction in photoperiodic sensitive animals. Its function in plants reproduction has not been extensively studied. In the current study, the effects of melatonin on the apple tree flowering have been systematically investigated. For consecutive 2-year monitoring, it was found that the flowering was always associated with the drop of melatonin level in apple tr…	JOURNAL OF PINEAL RESEARCH	2019	10.1111/jpi.12551	Zhang, Haixia	Kong, Jin	10	0	1	1	0	0	0	0	0	0	0	0	0	0	0	0	0	0	0	0	0	0	0	0	0	0	0	0	0	0	0	0	1	0	0	0	0	0	0	0	0	0
Melatonin in Apples and Juice: Inhibition of Browning and Microorganism Growth in Apple Juice	Zhang, Haixia; Liu, Xuan; Chen, Ting; Ji, Yazhen; Shi, Kun; Wang, Lin; Zheng, Xiaodong; Kong, Jin	Synthetic melatonin (N-acetyl-5-methoxytryptamine, MT) is popular in the US and Asian markets as a health supplement. Here, we identified a naturally occurring melatonin source in apple juice. Melatonin was present in all 18 apple cultivars tested. The highest melatonin level of the edible part of apple was detected in the apple peel. The melatonin content in 'Fuji' apple juice is comparable to t…	MOLECULES	2018	10.3390/molecules23030521	Zhang, Haixia	Kong, Jin	8	0	0	1	0	0	0	0	0	0	0	0	0	0	0	0	0	0	0	0	0	0	0	0	0	0	0	0	0	0	0	0	0	0	0	0	0	0	0	0	0	0
Effects of melatonin on the growth and cadmium characteristics of Cyphomandra betacea seedlings	Lin, Lijin; Li, Jianhua; Chen, Fabo; Liao, Ming'an; Tang, Yi; Liang, Dong; Xia, Hui; Lai, Yunsong; Wang, Xun; Chen, Cheng; Ren, Wei	To determine whether the melatonin (MT) could reduce cadmium (Cd) accumulation in Cyphomandra betacea seedlings, different concentrations of MT were added to the nutrient solution and soil to study its effects on the growth and Cd characteristics of C. betacea seedlings. Fifty micromoles per liter (mu mol/kg) of MT increased the biomass of C. betacea seedlings, but 100-200 mu mol/L (mu mol/kg) MT…	ENVIRONMENTAL MONITORING AND ASSESSMENT	2018	10.1007/s10661-018-6481-1	Lin, Lijin	Ren, Wei	11	0	0	0	0	0	0	0	0	0	0	0	0	0	0	0	0	0	0	0	0	0	0	0	0	0	0	0	0	0	0	0	0	0	0	0	0	0	0	0	0	0
Melatonin Is Involved in Regulation of Bermudagrass Growth and Development and Response to Low K+ Stress	Chen, Liang; Fan, Jibiao; Hu, Zhengrong; Huang, Xuebing; Amombo, Erick; Liu, Ao; Bi, Aoyue; Chen, Ke; Xie, Yan; Fu, Jinmin	Melatonin (N-acetyl-5-methoxytryptamine) plays critical roles in plant growth and development and during the response to multiple abiotic stresses. However, the roles of melatonin in plant response to K+ deficiency remain largely unknown. In the present study, we observed that the endogenous melatonin contents in bermudagrass were remarkably increased by low K+ (LK) treatment, suggesting that mel…	FRONTIERS IN PLANT SCIENCE	2017	10.3389/fpls.2017.02038	Chen, Liang	Fu, Jinmin	10	0	1	0	0	0	0	0	0	0	0	0	0	0	0	0	0	0	0	0	0	0	0	0	0	0	0	0	0	0	0	0	0	0	1	0	0	0	0	0	0	0
Melatonin Has the Potential to Alleviate Cinnamic Acid Stress in Cucumber Seedlings	Li, Juanqi; Li, Yang; Tan, Yongqiang; Qu, Mei; Zhang, Wenna; Gao, Lihong	Cinnamic acid (CA), which is a well-known major autotoxin secreted by the roots in cucumber continuous cropping, has been proven to exhibit inhibitory regulation of plant morphogenesis and development. Melatonin (MT) has been recently demonstrated to play important roles in alleviating plant abiotic stresses. To investigate whether MT supplementation could improve cucumber seedling growth under C…	FRONTIERS IN PLANT SCIENCE	2017	10.3389/fpls.2017.01193	Li, Juanqi	Gao, Lihong	6	0	0	0	0	0	0	0	0	0	0	0	0	0	0	0	0	0	0	0	0	0	0	0	0	0	0	0	0	0	0	0	0	0	0	0	0	0	0	0	0	0
High Concentration of Melatonin Regulates Leaf Development by Suppressing Cell Proliferation and Endoreduplication in Arabidopsis	Wang, Qiannan; An, Bang; Shi, Haitao; Luo, Hongli; He, Chaozu	N-acetyl-5-methoxytryptamine (Melatonin), as a crucial messenger in plants, functions in adjusting biological rhythms, stress tolerance, plant growth and development. Several studies have shown the retardation effect of exogenous melatonin treatment on plant growth and development. However, the in vivo role of melatonin in regulating plant leaf growth and the underlying mechanism are still unclea…	INTERNATIONAL JOURNAL OF MOLECULAR SCIENCES	2017	10.3390/ijms18050991	Wang, Qiannan	He, Chaozu	5	0	1	1	0	0	0	0	0	0	0	0	0	0	0	0	0	0	0	0	0	0	0	0	0	0	0	0	0	0	0	0	0	0	0	0	0	0	0	0	0	0
Melatonin restricts Pb-induced PCD by enhancing BI-1 expression in tobacco suspension cells	Kobylinska, A.; Posmyk, Malgorzata M.	Melatonin is a conserved substance, which was discovered in the evolutionary distant organisms like bacteria, plants, invertebrates and vertebrates. Recent studies have shown that melatonin despite its possible role in photoperiod processes, has been found to be a direct free radical scavenger and an indirect antioxidant. In this report the impact of exogenous melatonin on the Bax inhibitor-1 (BI…	BIOMETALS	2016	10.1007/s10534-016-9977-6	Kobylinska, A.	Posmyk, Malgorzata M.	2	0	0	0	0	0	0	0	0	0	0	0	0	0	0	0	0	0	0	0	0	0	0	0	0	0	0	0	0	0	0	0	0	0	0	0	0	0	0	0	0	0
Determination of melatonin content in traditional Thai herbal remedies used as sleeping aids	Padumanonda, Tanit; Johns, Jeffrey; Sangkasat, Autcharaporn; Tiyaworanant, Suppachai	Background: Melatonin content was screened in leaves of seven edible herbs used as sleeping aids in Thai traditional medicine. These plants are Piper nigrum L, Sesbania glandiflora (L.) Desv., Sesbania sesban (L.) Merr., Senna tora (L.) Roxb., Moringa oleifera Lam., Momordica charantia L. and Baccaurea ramiflora Lour. Dried leaves were extracted by sonication in methanol for six hours at room tem…	DARU-JOURNAL OF PHARMACEUTICAL SCIENCES	2014	10.1186/2008-2231-22-6	Padumanonda, Tanit	Tiyaworanant, Suppachai	4	1	1	0	0	0	0	0	0	0	0	0	0	0	0	0	0	0	0	0	0	0	0	0	0	0	0	0	0	0	0	0	0	0	0	0	0	0	0	0	0	0
Strigolactone represses the synthesis of melatonin, thereby inducing floral transition in Arabidopsis thaliana in an FLC-dependent manner	Zhang, Zixin; Hu, Qian; Liu, Yanan; Cheng, Peilei; Cheng, Hua; Liu, Weixin; Xing, Xiaojuan; Guan, Zhiyong; Fang, Weimin; Chen, Sumei; Jiang, Jiafu; Chen, Fadi	The transition from vegetative to reproductive growth is a key developmental event in a plant's life cycle. The process is mediated by a combination of phytohormones, including melatonin (MT) and strigolactone (SL). Here, the Arabidopsis mutants, d14-1 and max4-1, which are compromised with respect to either SL synthesis or signaling, were shown to flower earlier than wild types. The tissue MT co…	JOURNAL OF PINEAL RESEARCH	2019	10.1111/jpi.12582	Zhang, Zixin	Chen, Fadi	12	0	1	0	0	0	0	0	0	0	0	0	0	0	0	0	0	0	0	0	0	0	0	0	0	0	0	0	0	0	0	0	0	0	0	0	0	0	0	0	0	0
Melatonin increases the performance of Malus hupehensis after UV-B exposure	Wei, Zhiwei; Li, Chao; Gao, Tengteng; Zhang, Zhijun; Liang, Bowen; Lv, Zuosen; Zou, Yangjun; Ma, Fengwang	Melatonin, an evolutionarily conserved molecule, is implicated in numerous physiological processes in plants. To explore the potential roles of melatonin in response to UV-B radiation, we examined the influence of exogenous melatonin on Malus hupehensis Rehd. seedlings under two levels of UV-B radiation. Under UV-B stress, seedlings showed significant reduction in plant growth, biomass production…	PLANT PHYSIOLOGY AND BIOCHEMISTRY	2019	10.1016/j.plaphy.2019.04.026	Wei, Zhiwei	Ma, Fengwang	8	0	1	1	0	0	0	0	0	0	0	0	0	0	0	0	0	0	0	0	0	0	0	0	0	0	1	0	0	0	0	0	0	1	1	0	0	0	0	0	0	0
Effect of Exogenous Melatonin on Seed Germination and Seedling Growth in Melon (Cucumis melo L.) Under Salt Stress	Luis Castanares, Jose; Alberto Bouzo, Carlos	An investigation was carried out to evaluate the effect of different application forms and concentrations of melatonin on germination and initial growth of melon plants in several different salinity conditions. We evaluated germination percentage and growth of seedlings and measured total chlorophyll content, relative electrolyte leakage, peroxidase activity, root viability, proline concentration…	HORTICULTURAL PLANT JOURNAL	2019	10.1016/j.hpj.2019.01.002	Luis Castanares, Jose	Alberto Bouzo, Carlos	2	0	1	1	1	0	0	0	0	0	0	0	0	0	0	0	0	0	0	0	0	0	0	0	0	0	0	0	0	0	0	0	0	0	1	0	0	0	0	0	0	0
Exogenous melatonin improves salt tolerance in tomato by regulating photosynthetic electron flux and the ascorbate-glutathione cycle	Yin, Zepeng; Lu, Jiazhi; Meng, Sida; Liu, Yiling; Mostafa, Islam; Qi, Mingfang; Li, Tianlai	Melatonin (MT) can protect plants against abiotic stress. In order to explore whether melatonin can improve photosynthetic function under NaCl stress, Solanum lycopersicum L. cv. Liaoyuanduoli were exposed to 150 mmol L-1 NaCl stress with or without pretreatment with 150 mu mol L-1 melatonin. The results showed that NaCl stress can lead to reduced chlorophyll content, lower photosynthetic functio…	JOURNAL OF PLANT INTERACTIONS	2019	10.1080/17429145.2019.1645895	Yin, Zepeng	Li, Tianlai	7	0	0	0	1	0	0	0	0	0	0	0	0	0	0	0	0	0	0	0	0	0	0	0	0	0	0	0	0	0	0	0	0	0	1	0	0	0	0	0	0	0
Synergistic effects of melatonin and distinct spectral lights for enhanced production of anti-cancerous compounds in callus cultures of Fagonia indica	Khan, Taimoor; Ullah, Muhammad Asad; Garros, Laurine; Hano, Christophe; Abbasi, Bilal Haider	Fagonia indica is one of the commercially vital medicinal plant species. It is well-known for biosynthesis of anticancer phenolics and flavonoids metabolites. The plant has been exploited for in vitro studies and production of vital phytochemicals, however, the synergistic effects of melatonin and lights remains to be investigated. In current study, we have evaluated the synergistic effects of me…	JOURNAL OF PHOTOCHEMISTRY AND PHOTOBIOLOGY B-BIOLOGY	2019	10.1016/j.jphotobiol.2018.10.010	Khan, Taimoor	Abbasi, Bilal Haider	5	0	1	1	0	0	0	0	0	0	0	0	0	0	0	0	0	0	0	0	0	0	0	0	0	0	0	0	1	0	0	0	1	0	0	0	0	0	0	0	0	0
The mitigation effects of exogenous melatonin on replant disease in apple	Li, Chao; Zhao, Qi; Gao, Tengteng; Wang, Hongying; Zhang, Zhijun; Liang, Bowen; Wei, Zhiwei; Liu, Changhai; Ma, Fengwang	Melatonin mediates many physiological processes in plants. The problem of apple replant disease is unsolved. Our study objectives were to evaluate the regulatory effect of melatonin on plant resistance to this challenge and investigate the preliminary mechanism by which melatonin helps alleviate the effects of this disease. Two-year-old trees of Fuji apple (Malus domestica), grafted onto rootstoc…	JOURNAL OF PINEAL RESEARCH	2018	10.1111/jpi.12523	Li, Chao	Ma, Fengwang	9	0	1	1	1	0	0	0	0	0	0	0	0	0	0	0	0	0	0	0	0	0	0	0	0	0	0	0	0	0	0	0	0	0	1	0	0	0	0	0	0	0
Exogenous Melatonin Improves Fruit Quality Features, Health Promoting Antioxidant Compounds and Yield Traits in Tomato Fruits under Acid Rain Stress	Debnath, Biswojit; Hussain, Mubasher; Li, Min; Lu, Xiaocao; Sun, Yueting; Qiu, Dongliang	Acid rain is a serious worldwide environmental problem which reduces the growth and yield of crops. Melatonin, as a pleiotropic molecule has been known to improve stress tolerance by limiting the oxidative damage of plants exposed to adverse environments. However, the role of exogenous melatonin particularly on the yield and antioxidant compounds in tomato fruits under abiotic stress condition re…	MOLECULES	2018	10.3390/molecules23081868	Debnath, Biswojit	Qiu, Dongliang	6	0	0	0	1	0	0	0	0	0	0	0	0	0	0	0	0	0	0	0	0	0	0	0	1	0	0	0	0	0	0	0	0	0	0	1	0	0	0	0	0	0
Melatonin and Expression of Tryptophan Decarboxylase Gene (TDC) in Herbaceous Peony (Paeonia lactiflora Pall.) Flowers	Zhao, Daqiu; Wang, Rong; Liu, Ding; Wu, Yanqing; Sun, Jing; Tao, Jun	Melatonin is a bioactive, edible ingredient that promotes human health and exists widely in plants, but little is known about its biosynthetic routes and underlying molecular mechanisms in the herbaceous peony. In this contribution, we found that herbaceous peony flowers are rich in melatonin that is found in the greatest quantities in the white series, followed by the ink series, the red series …	MOLECULES	2018	10.3390/molecules23051164	Zhao, Daqiu	Tao, Jun	6	0	0	1	0	0	0	0	0	0	0	0	0	0	0	0	0	0	0	0	0	0	0	0	0	0	0	0	0	0	0	0	0	0	0	0	0	0	0	0	0	0
Synthetic pathways and processes for effective production of 5-hydroxytryptophan and serotonin from glucose in Escherichia coli	Mora-Villalobos, Jose-Anibal; Zeng, An-Ping	Background: Tryptophan derivatives such as 5-hydroxytryptophan (5HTP) and serotonin are valuable molecules with pharmaceutical interest. 5HTP is presently mainly obtained by extraction from the plant Griffonia simplicifolia and serotonin is produced by chemical synthesis. A simple biotechnological method for the production of these compounds is desired. Results: In a first attempt to synthesize s…	JOURNAL OF BIOLOGICAL ENGINEERING	2018	10.1186/s13036-018-0094-7	Mora-Villalobos, Jose-Anibal	Zeng, An-Ping	2	0	0	0	0	0	0	0	0	0	0	0	0	0	0	0	0	0	0	0	0	0	0	0	0	0	0	0	0	0	0	0	0	0	0	0	0	0	0	0	0	0
Identification of differentially expressed proteins in bermudagrass response to cold stress in the presence of ethylene	Hu, Zhengrong; Liu, Ao; Bi, Aoyue; Amombo, Erick; Gitau, Margaret Mukami; Huang, Xuebing; Chen, Liang; Fu, Jinmin	Low temperature is considered to be a key environmental factor that limits broad application of bermudagrass (Cynodon dactylon). The phytohormone ethylene has been confirmed to be involved in plant response to cold stress. However, there is limited knowledge concerning the proteomic alterations of ethylene-regulated cold stress response in plant. To explore the possible molecular mechanism, a pro…	ENVIRONMENTAL AND EXPERIMENTAL BOTANY	2017	10.1016/j.envexpbot.2017.04.001	Hu, Zhengrong	Fu, Jinmin	8	0	0	0	0	0	0	0	0	0	0	0	0	0	0	0	0	0	0	0	0	0	0	1	0	0	0	0	0	0	0	0	0	0	0	0	0	0	0	0	0	0
Interactive effects of melatonin and light on growth parameters and biochemical markers in adventitious roots of Withania somnifera L.	Adil, Muhammad; Abbasi, Bilal Haider; Khan, Tariq	Light plays a pertinent role in plant photo-morphogenesis and it is believed to have an impact on the melatonin-induced physiological functions. In the current study, different light regimes were employed with varying levels of melatonin, either singly or in combination with auxins for the growth and development of adventitious roots in Withania somnifera L. It was observed that 600 A mu M melato…	PLANT CELL TISSUE AND ORGAN CULTURE	2015	10.1007/s11240-015-0844-x	Adil, Muhammad	Khan, Tariq	3	0	1	0	0	0	0	0	0	0	0	0	0	0	0	0	0	0	0	0	0	0	0	0	0	0	0	0	0	0	0	0	1	0	0	0	0	0	0	0	0	0
Tryptophan-Ethylester, the False (Unveiled) Melatonin Isomer in Red Wine	Iriti, Marcello; Vigentini, Ileana	Among the food plants, the presence of melatonin in grapes (Vitis vinifera L.) deserves particular attention because of the production of wine, an alcoholic beverage of economic relevance and with putative healthy effects. Furthermore, melatonin isomers have been detected in wine too. Recently, one of these isomers has been identified as tryptophan-ethylester, a compound with the same molecular w…	INTERNATIONAL JOURNAL OF TRYPTOPHAN RESEARCH	2015	10.4137/IJTR.S22450	Iriti, Marcello	Vigentini, Ileana	2	0	0	0	0	0	0	0	0	0	0	0	0	0	0	0	0	0	0	0	0	0	0	0	0	0	0	0	0	0	0	0	0	0	0	0	0	0	0	0	0	0
Photoperiod influences endogenous indoleamines in cultured green alga Dunaliella bardawil	Ramakrishna, A.; Dayananda, C.; Giridhar, P.; Rajasekaran, T.; Ravishankar, G. A.		INDIAN JOURNAL OF EXPERIMENTAL BIOLOGY	2011		Ramakrishna, A.	Ravishankar, G. A.	5	0	0	0	0	1	0	0	0	0	0	0	0	0	0	0	0	0	0	0	0	0	0	0	0	0	0	0	0	0	0	0	0	0	0	0	0	0	0	0	0	0
DEVELOPMENT OF HIGHBUSH BLUEBERRY (Vaccinium corymbosum hort. non L.) in vitro SHOOT CULTURES UNDER THE INFLUENCE OF MELATONIN	Litwinczuk, Wojciech; Wadas-Boron, Magdalena	The influence of melatonin (MEL) in comparison with IAA, IBA (all at 5.71 mu M), and auxin-free (0) medium on development of highbush blueberry (Vaccinium corymbosum hort. non L.) 'Herbert' in vitro shoot cultures was examined. Depending on the kind of hormone in vitro cultures consisted of various number of axillary (AX) and adventitious (AD) shoots. The influence of melatonin on in vitro cultur…	ACTA SCIENTIARUM POLONORUM-HORTORUM CULTUS	2009		Litwinczuk, Wojciech	Wadas-Boron, Magdalena	2	0	0	0	0	0	0	0	0	0	0	0	0	0	0	0	0	0	0	0	0	0	0	0	0	0	0	0	0	0	0	0	0	0	0	0	0	0	0	0	0	0
Exogenous melatonin-mediated modulation of arsenic tolerance with improved accretion of secondary metabolite production, activating antioxidant capacity and improved chloroplast ultrastructure in rosemary herb	Farouk, Saad; Al-Amri, Salem M.	Arsenic (As) recognized as a group I human carcinogen additionally poses a threat to plants which limit growth, metabolic activity, and productivity. Melatonin (MEL) is a naturally occurring compound in plants that have been recognized to mediate numerous morphological, physiological and molecular processes. Conversely, the role of MEL in inducing As-tolerance remains inexpressible and the plausi…	ECOTOXICOLOGY AND ENVIRONMENTAL SAFETY	2019	10.1016/j.ecoenv.2019.05.021	Farouk, Saad	Al-Amri, Salem M.	2	0	0	0	1	0	0	0	0	0	0	0	0	0	0	0	0	0	0	0	0	0	0	0	1	1	0	0	0	0	0	0	0	0	0	0	0	1	0	0	0	0
COMT1 overexpression resulting in increased melatonin biosynthesis contributes to the alleviation of carbendazim phytotoxicity and residues in tomato plants	Yan, Yanyan; Sun, Shasha; Zhao, Ning; Yang, Wanying; Shi, Qinghua; Gong, Biao	Melatonin (Mel) serves as an important signalling molecule in various aspects of stress tolerance in plants. However, the function of Mel in pesticide metabolism remains unknown. Here, selecting the widely used fungicide carbendazim (MBC) as the model, we found that exogenous Mel had the ability to alleviate pesticide phytotoxicity and residues in tomato as well as in some other vegetables. Addit…	ENVIRONMENTAL POLLUTION	2019	10.1016/j.envpol.2019.05.052	Yan, Yanyan	Gong, Biao	6	0	0	0	0	0	0	0	0	0	0	0	0	0	0	0	0	0	0	0	0	0	0	1	0	0	0	0	0	0	0	0	0	0	0	0	0	0	0	0	0	0
Exogenous melatonin accelerates seed germination in cotton (Gossypium hirsutum L.)	Xiao, Shuang; Liu, Liantao; Wang, Hao; Li, Dongxiao; Bai, Zhiying; Zhang, Yongjiang; Sun, Hongchun; Zhang, Ke; Li, Cundong	Seed germination is considered the beginning of the spermatophyte lifecycle, and it is a crucial stage in determining subsequent plant growth and development. Although many previous studies have found that melatonin can promote seed germination, the role of melatonin in cotton germination remains unexamined. The main objective of this study is the characterization of potential promotional effects…	PLOS ONE	2019	10.1371/journal.pone.0216575	Xiao, Shuang	Li, Cundong	9	0	1	1	1	0	0	0	0	0	0	0	0	0	0	0	0	0	0	0	0	0	0	0	0	0	0	1	1	0	0	0	0	0	0	0	0	0	0	1	0	0
Melatonin enhances thermotolerance of maize seedlings (Zea mays L.) by modulating antioxidant defense, methylglyoxal detoxification, and osmoregulation systems	Li, Zhong-Guang; Xu, Ying; Bai, Li-Kang; Zhang, Shu-Yan; Wang, Yue	Melatonin (MT), derived from tryptophan, is an amazing signaling molecule with multiple functions in plants. Heat stress (HS) induced by high temperature is a major stress factor that limits metabolism, growth, development, and productivity of plants. However, whether MT could enhance the thermotolerance of maize seedlings and the underlying mechanisms is not completely known. In this study, trea…	PROTOPLASMA	2019	10.1007/s00709-018-1311-4	Li, Zhong-Guang	Wang, Yue	5	0	1	1	0	0	0	0	0	0	0	0	0	0	0	0	0	0	0	0	0	0	0	1	1	0	0	1	0	0	0	0	0	0	0	0	0	0	0	0	0	0
Melatonin-Mediated Sugar Accumulation and Growth Inhibition in Apple Plants Involves Down-Regulation of Fructokinase 2 Expression and Activity	Yang, Jingjing; Zhang, Chunxia; Wang, Zhengyang; Sun, Simin; Zhan, Ruiling; Zhao, Yuyue; Ma, Baiquan; Ma, Fengwang; Li, Mingjun	Melatonin has been reported to play roles in regulating carbohydrate levels and plant growth. However, little is known about the exact mechanism by which melatonin regulates sugar levels and growth in plants. In this study, it was found that high levels of melatonin inhibited the growth of wild-type (WT) apple plants and induced significant accumulations of fructose, glucose, and sucrose in apple…	FRONTIERS IN PLANT SCIENCE	2019	10.3389/fpls.2019.00150	Yang, Jingjing	Li, Mingjun	9	0	0	0	0	0	0	0	0	0	0	0	0	0	0	0	0	0	0	0	0	0	0	0	0	0	0	0	0	0	0	0	0	0	0	0	0	0	0	0	0	0
Melatonin treatment of pre-veraison grape berries modifies phenolic components and antioxidant activity of grapes and wine	Meng, Jiang-Fei; Yu, Yong; Shi, Tian-Ci; Fu, Yu-Shi; Zhao, Ting; Zhang, Zhen-Wen	A comprehensive investigation was conducted to determine the effects of exogenous melatonin treatment of pre-veraison grapes on phenolic components and antioxidants of grape berries and wine. The results showed an increase in the concentration of cyanin-3-O-glucoside, peonidin derivatives, and two flavanols [namely (+)-catechins and (-)-epicatechins] of grapes, as well as flavonols in both grapes…	FOOD SCIENCE AND TECHNOLOGY	2019	10.1590/1678-457X.24517	Meng, Jiang-Fei	Zhang, Zhen-Wen	6	0	0	0	0	0	0	0	0	0	0	0	0	0	0	0	0	0	0	0	0	0	0	0	1	0	0	0	0	0	0	0	0	0	0	0	0	0	0	0	0	0
Transcriptomic and physiological analyses reveal drought adaptation strategies in drought-tolerant and-susceptible watermelon genotypes	Li, Hao; Mo, YanLing; Cui, Qi; Yang, XiaoZhen; Guo, YanLiang; Wei, ChunHua; Yang, Jianqiang; Zhang, Yong; Ma, JianXiang; Zhang, Xian	Drought stress has become one of the most urgent environmental hazards for horticultural crops. In this research, we analyzed watermelon adaptation strategies to drought stress in drought-tolerant (M20) and-susceptible (Y34) genotypes via transcriptomic and physiological analyses. After drought stress, a total of 6228 and 4311 differentially expressed genes (DEGs) were observed in Y34 and M20, re…	PLANT SCIENCE	2019	10.1016/j.plantsci.2018.10.016	Li, Hao	Zhang, Xian	10	0	1	1	0	0	0	0	0	0	0	0	0	0	0	0	0	0	0	0	0	0	0	0	0	0	0	0	0	0	0	0	0	0	0	0	0	0	0	0	0	0
Exogenous melatonin trigger biomass accumulation and production of stress enzymes during callogenesis in medicinally important Prunella vulgaris L. (Selfheal)	Fazal, Hina; Abbasi, Bilal Haider; Ahmad, Nisar; Ali, Mohammad	The objective of the current study was to monitor the variations caused by the application of exogenous melatonin on growth kinetics and production of stress enzymes in Prunella vulgaris. Leaf and petiole explants were used for callogenesis. These explants were inoculated on Murashige and Skoog media containing various concentrations of melatonin alone or in combination with 2.0 mg/l naphthalene …	PHYSIOLOGY AND MOLECULAR BIOLOGY OF PLANTS	2018	10.1007/s12298-018-0567-7	Fazal, Hina	Ali, Mohammad	4	0	0	0	1	0	0	0	0	0	0	0	0	0	0	0	0	0	0	0	0	0	0	0	0	0	0	0	1	0	0	0	0	0	0	0	0	0	0	0	0	0
PR-10 proteins as potential mediators of melatonin-cytokinin cross-talk in plants: crystallographic studies of LlPR-10.2B isoform from yellow lupine	Sliwiak, Joanna; Sikorski, Michal; Jaskolski, Mariusz	LlPR-10.2B, a Pathogenesis-related class 10 (PR-10) protein from yellow lupine (Lupinus luteus) was crystallized in complex with melatonin, an emerging important plant regulator and antioxidant. The structure reveals two molecules of melatonin bound in the internal cavity of the protein, plus a very well-defined electron density near the cavity entrance, corresponding to an unknown ligand molecul…	FEBS JOURNAL	2018	10.1111/febs.14455	Sliwiak, Joanna	Jaskolski, Mariusz	3	0	0	0	0	0	0	0	0	0	0	0	0	0	0	0	0	0	0	0	0	0	0	0	0	1	0	0	0	0	0	0	0	0	0	0	0	0	0	0	0	0
The Effects of Seed Treatment with Melatonin on Germination and Emergence Performance of Pepper Seeds under Chilling Stress	Korkmaz, Ahmet; Karaca, Aygul; Kocacinar, Ferit; Cuci, Yakup	In this research, the possibilities of improving chilling stress tolerance in pepper (Capsicum annuum L.) at seedling stages were investigated. In order to improve tolerance to chilling stress, melatonin was applied in various concentrations (0, 1, 5 or 25 mu M) through foliar spray. After melatonin applications, plants were subjected to chilling stress at (5 degrees C/10 degrees C, night/day) fo…	JOURNAL OF AGRICULTURAL SCIENCES-TARIM BILIMLERI DERGISI	2017		Korkmaz, Ahmet	Cuci, Yakup	4	0	0	0	0	0	0	0	0	0	0	0	0	0	0	0	0	0	0	0	0	0	0	0	0	0	0	0	0	0	0	0	0	0	0	0	0	0	0	0	0	0
MELATONIN-LOADED ALGINATE BEADS IMPROVE CRYOPRESERVATION OF YAM (Dioscorea alata and D. cayenensis)	Uchendu, Esther E.; Keller, E. R. Joachim	BACKGROUND: The cryopreservation of yam is constrained with many challenges. OBJECTIVE: This study tested the effects of melatonin on shoot tips of D. alata and D. cayenensis accessions exposed to water and liquid nitrogen (LN) stresses. MATERIALS AND METHODS: Sucrose pretreatment (0.3 M) was applied for 48 h before cryopreservation. Shoot tips were encapsulated in beads loaded with 0.75 M sucros…	CRYOLETTERS	2016		Uchendu, Esther E.	Keller, E. R. Joachim	2	0	0	0	0	0	0	0	0	0	0	0	0	0	0	0	0	0	0	0	0	0	0	0	0	0	0	0	0	0	0	0	0	0	0	0	0	0	0	0	0	0
Salinity-Induced Noise in Membrane Potential of Characeae Chara australis: Effect of Exogenous Melatonin	Beilby, Mary J.; Al Khazaaly, Sabah; Bisson, Mary A.	Salt sensitive Characeae Chara australis responds to 50 mM NaCl by a prompt appearance of noise in the trans-membrane potential difference (PD). The noise diminishes with time in saline and PD depolarization, leading to altered current-voltage characteristics that could be modeled with H+/OH- channels. Beilby and Al Khazaaly (JMB 230:21-34, 2009) suggested that the noise might arise from cooperat…	JOURNAL OF MEMBRANE BIOLOGY	2015	10.1007/s00232-014-9746-9	Beilby, Mary J.	Bisson, Mary A.	3	1	1	1	1	0	0	0	0	0	0	0	0	0	0	0	0	0	0	0	0	0	0	0	0	0	0	0	0	0	0	0	0	0	0	0	0	0	0	0	0	0
Alleviating effects of exogenous melatonin on salt stress in cucumber	Zhang, Tengguo; Shi, Zhongfei; Zhang, Xiaohua; Zheng, Sheng; Wang, Juan; Mo, Jiangnan	Melatonin (N-acetyl-5-methoxytryptamine) is an important molecule in plants that regulates growth and development and responds to abiotic stresses. In this study, we studied the role of exogenous melatonin in alleviating salt stress in cucumber. The results showed that exogenous melatonin pretreatment could improve cell viability, protect photosynthesis, increase antioxidant enzyme activity, inhi…	SCIENTIA HORTICULTURAE	2020	10.1016/j.scienta.2019.109070	Zhang, Tengguo	Mo, Jiangnan	6	0	1	0	1	0	0	0	0	0	0	0	0	0	0	0	0	0	0	0	0	0	0	0	0	0	1	1	0	0	0	0	0	0	0	0	0	0	0	0	0	0
Melatonin Application Improves Salt Tolerance of Alfalfa (Medicago sativa L.) by Enhancing Antioxidant Capacity	Cen, Huifang; Wang, Tingting; Liu, Huayue; Tian, Danyang; Zhang, Yunwei	Alfalfa (Medicago sativa L.) is an important and widely cultivated forage grass. The productivity and forage quality of alfalfa are severely affected by salt stress. Melatonin is a bioactive molecule with versatile physiological functions and plays important roles in response to various biotic and abiotic stresses. Melatonin has been proven efficient in improving alfalfa drought and waterlogging …	PLANTS-BASEL	2020	10.3390/plants9020220	Cen, Huifang	Zhang, Yunwei	5	0	0	1	0	0	0	0	0	0	0	0	0	0	0	0	0	0	0	0	0	0	0	0	1	0	1	1	1	0	0	0	0	0	0	0	0	0	0	0	0	0
Melatonin alleviates pericarp browning in litchi fruit by regulating membrane lipid and energy metabolisms	Wang, Tian; Hu, Meijiao; Yuan, Debao; Yun, Ze; Gao, Zhaoyin; Su, Zihan; Zhang, Zhengke	Melatonin functions as a pivotal bio-active molecule that is involved in diverse physiological processes in plants. This study investigated the effects of exogenous melatonin on browning, membrane phospholipids, membrane fatty acids, energy status, and activities of enzymes associated with lipid and energy metabolisms in harvested litchi (Litchi chinensis Sonn. cv. A4Wuhe) fruit during storage at…	POSTHARVEST BIOLOGY AND TECHNOLOGY	2020	10.1016/j.postharvbio.2019.111066	Wang, Tian	Zhang, Zhengke	7	0	0	0	0	0	0	0	0	0	0	0	0	0	0	0	0	0	0	0	0	0	0	1	0	0	0	0	0	0	0	0	0	0	0	0	0	0	0	0	0	0
Overexpression of CrCOMT from Carex rigescens increases salt stress and modulates melatonin synthesis in Arabidopsis thaliana	Zhang, Kun; Cui, Huiting; Cao, Shihao; Yan, Li; Li, Mingna; Sun, Yan	Key message CrCOMT, a COMT gene in Carex rigescens, was verified to enhance salt stress tolerance in transgenic Arabidopsis. High salinity severely restricts plant growth and development while melatonin can alleviate salt damage. Caffeic acid O-methyltransferase (COMT) plays an important role in regulating plant growth, development, and stress responses. COMT could also participate in melatonin b…	PLANT CELL REPORTS	2019	10.1007/s00299-019-02461-7	Zhang, Kun	Sun, Yan	6	0	0	0	0	0	0	0	0	0	0	0	0	0	0	0	0	0	0	0	0	0	0	0	0	0	0	0	0	0	0	0	0	0	1	0	0	0	0	0	0	0
Exogenous melatonin confers drought stress by promoting plant growth, photosynthetic capacity and antioxidant defense system of maize seedlings	Ahmad, Shakeel; Kamran, Muhammad; Ding, Ruixia; Meng, Xiangping; Wang, Haiqi; Ahmad, Irshad; Fahad, Shah; Han, Qingfang	Melatonin is an important biologically active hormone that plays a vital role in plant growth and development. In particular, it has been investigated for its roles in abiotic stress management. The current experiment was carried out to investigate the protective role of melatonin in photosynthetic traits and the antioxidant defense system of maize seedling under drought stress. Maize seedlings w…	PEERJ	2019	10.7717/peerj.7793	Ahmad, Shakeel	Han, Qingfang	8	0	0	0	1	0	0	0	0	0	0	0	0	0	0	0	0	0	0	0	0	0	0	0	1	0	0	0	0	0	0	0	0	0	1	1	0	0	0	0	0	0
Comparative transcriptomic and metabolic analysis reveals the effect of melatonin on delaying anthracnose incidence upon postharvest banana fruit peel	Li, Taotao; Wu, Qixian; Zhu, Hong; Zhou, Yijie; Jiang, Yueming; Gao, Huijun; Yun, Ze	BackgroundBanana anthracnose, caused by Colletotrichum musae, is one of the most severe postharvest diseases in banana. Melatonin is widely known for its role in enhancing plant stress tolerance. However, little is known about the control of melatonin on anthracnose in postharvest banana fruit.ResultsIn this study, exogenous melatonin treatment could significantly reduce the incidence of anthracn…	BMC PLANT BIOLOGY	2019	10.1186/s12870-019-1855-2	Li, Taotao	Yun, Ze	7	0	1	0	0	0	0	0	0	0	0	0	0	0	0	0	0	0	0	0	0	0	0	1	0	0	0	0	0	0	0	0	0	0	0	0	0	0	0	0	0	0
Exogenous application of melatonin improves plant resistance to virus infection	Zhao, L.; Chen, L.; Gun, P.; Zhan, X.; Zhang, Y.; Hou, C.; Wu, Z.; Wu, Y-F; Wang, Q-C	In this study, melatonin (MEL)-mediated plant resistance to tobacco mosaic virus (TMV) was examined to study local infection in Nicotiana glutinosa and systemic infection in Solanum lycopersicum. Exogenous application of 100 mu m MEL increased anti-virus infection activity to 37.4% in virus-infected N. glutinosa plants. The same treatment significantly reduced relative levels of virus RNA analyse…	PLANT PATHOLOGY	2019	10.1111/ppa.13057	Zhao, L.	Wang, Q-C	9	0	0	0	1	0	0	0	0	0	0	0	0	0	0	0	0	0	0	0	0	0	0	0	0	0	1	0	0	0	0	0	0	0	0	0	0	0	0	0	0	1
Melatonin, glutathione and thiourea attenuates lead and acid rain-induced deleterious responses by regulating gene expression of antioxidants in Trigonella foenum graecum L.	Xalxo, R.; Keshavkant, S.	Lead and acid rain are important abiotic stress factors that limit the growth, development, metabolic activity and yield of the crops. Melatonin (MT; an indoleamine molecule), glutathione (GSH; free thiol tripeptide) and thiourea (TU; non physiological thiol based ROS scavenger) have been known to mediate several physiological, biochemical and molecular processes in plants under different kinds o…	CHEMOSPHERE	2019	10.1016/j.chemosphere.2019.01.029	Xalxo, R.	Keshavkant, S.	2	0	0	0	0	0	0	0	0	0	0	0	0	0	0	0	0	0	0	0	0	0	0	0	1	0	1	1	1	0	0	0	0	0	0	0	0	0	0	0	0	0
Comparative physiological responses and transcriptome analysis reveal the roles of melatonin and serotonin in regulating growth and metabolism in Arabidopsis	Wan, Jinpeng; Zhang, Ping; Wang, Ruling; Sun, Liangliang; Ju, Qiong; Xu, Jin	BackgroundMelatonin and serotonin are well-known signaling molecules that mediate multiple physiological activities in plants, including stress defense, growth, development, and morphogenesis, but their underlying mechanisms have not yet been thoroughly elucidated. In this study, we investigated the roles of melatonin and serotonin in modulating plant growth and defense by integrating physiologic…	BMC PLANT BIOLOGY	2018	10.1186/s12870-018-1548-2	Wan, Jinpeng	Xu, Jin	6	0	0	0	0	0	0	0	0	0	0	0	0	0	0	0	0	0	0	0	0	0	0	1	0	0	0	0	0	0	0	0	0	0	0	0	0	0	0	0	0	0
Melatonin biosynthesis enzymes recruit WRKY transcription factors to regulate melatonin accumulation and transcriptional activity on W-box in cassava	Wei, Yunxie; Liu, Guoyin; Chang, Yanli; Lin, Daozhe; Reiter, Russel J.; He, Chaozu; Shi, Haitao	Melatonin is widely involved in growth, development, and stress responses in plants. Although the melatonin synthesis enzymes have been identified in various plants, their interacting proteins remain unknown. Herein, overexpression of tryptophan decarboxylase 2 (MeTDC2)-interacting proteins, N-acetylserotonin O-methyltransferase 2 (MeASMT2) interacting proteins, and N-acetylserotonin O-methyltran…	JOURNAL OF PINEAL RESEARCH	2018	10.1111/jpi.12487	Wei, Yunxie	Shi, Haitao	7	0	1	1	0	0	0	0	0	0	0	0	0	0	0	0	0	0	0	0	0	0	0	0	0	0	0	0	0	0	0	0	0	0	0	0	0	0	0	0	0	0
Powdery Mildew Resistant Rootstocks that Impart Tolerance to Grafted Susceptible Watermelon Scion Seedlings	Kousik, Chandrasekar S.; Mandal, Mihir; Hassell, Richard	Powdery mildew (PM) is a major foliar disease causing serious economic losses of cucurbit crops grown in the United States. The pathogen Podosphaera xanthii, which causes PM, is known to infect seedlings, stems, foliage, petioles, and fruit of cucurbit crops. In recent years, grafting watermelon on resistant rootstocks for managing soilbome diseases has been gaining popularity in the U.S.A. Howev…	PLANT DISEASE	2018	10.1094/PDIS-09-17-1384-RE	Kousik, Chandrasekar S.	Hassell, Richard	3	0	0	0	0	0	0	0	0	0	0	0	0	0	0	0	0	0	0	0	0	0	0	0	0	0	0	0	0	0	0	0	0	0	0	0	0	0	0	0	0	0
Genome-wide identification and expression profile analysis of the NAC transcription factor family during abiotic and biotic stress in woodland strawberry	Zhang, He; Kang, Hao; Su, Chulian; Qi, Yanxiang; Liu, Xiaomei; Pu, Jinji	The NAC transcription factors involved plant development and response to various stress stimuli. However, little information is available concerning the NAC family in the woodland strawberry. Herein, 37 NAC genes were identified from the woodland strawberry genome and were classified into 13 groups based on phylogenetic analysis. And further analyses of gene structure and conserved motifs showed …	PLOS ONE	2018	10.1371/journal.pone.0197892	Zhang, He	Pu, Jinji	6	0	0	0	0	0	0	0	0	0	0	0	0	0	0	0	0	0	0	0	0	0	0	0	0	0	1	0	0	0	0	0	0	0	0	0	0	0	0	0	0	0
Effect of Melatonin on the stability and expression of reference genes in Catharanthus roseus	Sheshadri, S. A.; Nishanth, M. J.; Yamine, V.; Simon, Bindu	The role of Melatonin in influencing diverse genes in plants has gained momentum in recent years and many reports have employed qRT-PCR for their quantification. Relative quantification of gene expression relies on accurate normalization of qRT-PCR data against a stably-expressing internal reference-gene. Although researchers have been using commonly available reference-genes to assess Melatonin-…	SCIENTIFIC REPORTS	2018	10.1038/s41598-018-20474-2	Sheshadri, S. A.	Simon, Bindu	4	0	0	0	0	0	0	0	0	0	0	0	0	0	0	0	0	0	0	0	0	0	0	0	0	1	0	0	0	0	0	0	0	0	0	0	0	0	0	0	0	0
Exogenous melatonin expediently modifies proteome of maize (Zea mays L.) embryo during seed germination	Kolodziejczyk, Izabela; Dzitko, Katarzyna; Szewczyk, Rafal; Posmyk, Malgorzata M.	Melatonin (N-acetyl-5-methoxytryptamine) has a great potential for plant biostimulation. Its role in plant physiology is intensively explored, and its important function in plant stress defence frequently underlined. Melatonin is particularly effective when applied as an additional factor of seed priming. In the presented research, hydroconditioning was chosen experimentally as optimal for maize …	ACTA PHYSIOLOGIAE PLANTARUM	2016	10.1007/s11738-016-2166-y	Kolodziejczyk, Izabela	Posmyk, Malgorzata M.	4	0	0	0	1	0	0	0	0	0	0	0	0	0	0	0	0	0	0	0	0	0	0	0	0	0	0	0	0	0	0	0	0	0	0	0	0	0	0	0	0	0
A straightforward procedure to biosynthesise melatonin using freshly chopped Achillea millefolium L. as reagent	Marioni, Franco; Bertoli, Alessandra; Pistelli, Luisa	D, L-Tryptophan as the precursor of melatonin and Achillea millefolium L. as the plant cell tissue were used in order to force the plant enzymatic system to enhance the production of melatonin. The biotransformation protocol was performed by adding the precursor to the freshly chopped plant material suspended in water and stirred at room temperature in total darkness. The melatonin content was ev…	PHYTOCHEMISTRY LETTERS	2008	10.1016/j.phytol.2008.06.001	Marioni, Franco	Pistelli, Luisa	3	1	0	1	0	0	0	0	0	0	0	0	0	0	0	0	0	0	0	0	0	0	0	0	0	0	0	0	0	0	0	0	0	0	0	0	0	0	0	0	0	0
Chromium resistant microbes and melatonin reduced Cr uptake and toxicity, improved physio-biochemical traits and yield of wheat in contaminated soil	Seleiman, Mahmoud F.; Ali, Shafaqat; Refay, Yahya; Rizwan, Muhammad; Alhammad, Bushra Ahmed; El-Hendawy, Salah E.	Melatonin and metal resistant microbes can enhance plant defense responses against various abiotic stresses, but little is known about the combined effects of melatonin and chromium (Cr) resistant microbes on reducing Cr toxicity in wheat (Triticum aestivum L.). In current study, we examined the effects of combined application of melatonin (0,1, 2 mM) and Bacillus subtilis (with and without inocu…	CHEMOSPHERE	2020	10.1016/j.chemosphere.2020.126239	Seleiman, Mahmoud F.	El-Hendawy, Salah E.	6	0	0	0	0	0	0	0	0	0	0	0	0	0	0	0	0	0	0	0	0	0	0	0	0	0	1	1	0	0	0	0	0	0	1	0	0	0	0	0	0	0
Seed priming with melatonin effects on growth, essential oil compounds and antioxidant activity of basil (Ocimum basilicum L.) under salinity stress	Bahcesular, Burak; Yildirim, Emel Diraz; Karacocuk, Meral; Kulak, Muhittin; Karaman, Sengul	Melatonin has been reported to exhibit significant functions in plant growth and development in response stress conditions. Along with the present study, the effects of melatonin priming on plant growth and development, essential oil, phenolic acids and antioxidant activities of basil (Ocimum basilicum L.) under salinity were examined. In this context, the seeds were firstly primed with 1 and 10 …	INDUSTRIAL CROPS AND PRODUCTS	2020	10.1016/j.indcrop.2020.112165	Bahcesular, Burak	Karaman, Sengul	5	0	0	0	0	0	0	0	0	0	0	0	0	0	0	0	0	0	0	0	0	0	0	0	1	0	0	0	0	0	0	0	0	0	0	0	0	0	0	0	0	0
Melatonin application reduces fluoride uptake and toxicity in rice seedlings by altering abscisic acid, gibberellin, auxin and antioxidant homeostasis	Banerjee, Aditya; Roychoudhury, Aryadeep	The manuscript presents an elaborate report on the ameliorative effects of exogenous melatonin in soil-grown seedlings of the rice variety, IR-64 subjected to prolonged fluoride stress. Exogenous melatonin stimulated the physiological growth of the stressed seedlings by triggering high accumulation of gibberellic acid (GA) and melatonin via up regulation of the biosynthetic genes like GA3ox, TDC,…	PLANT PHYSIOLOGY AND BIOCHEMISTRY	2019	10.1016/j.plaphy.2019.10.033	Banerjee, Aditya	Roychoudhury, Aryadeep	2	0	0	0	0	0	0	0	0	0	0	0	0	0	0	0	0	0	0	0	0	0	0	0	1	0	0	1	0	0	0	0	0	0	0	0	0	0	0	1	1	0
Knockout of Arabidopsis Serotonin N-Acetyltransferase-2 Reduces Melatonin Levels and Delays Flowering	Lee, Hyoung Yool; Lee, Kyungjin; Back, Kyoungwhan	Melatonin plays roles in both plant growth and defense. Serotonin N-acetyltransferase (SNAT) catalyzes formation of N-acetylserotonin (NAS) from serotonin. Plants contain two SNAT isogenes, which exhibit low-level amino acid homology. We studied the ArabidopsisthalianaSNAT2 (AtSNAT2) gene; we prepared recombinant SNAT2 protein and characterized a snat2 knockout mutant. The SNAT2 protein exhibited…	BIOMOLECULES	2019	10.3390/biom9110712	Lee, Hyoung Yool	Back, Kyoungwhan	3	0	0	0	0	0	1	0	0	0	0	0	0	0	0	0	0	0	0	0	0	0	0	0	0	0	0	0	0	0	0	0	0	0	0	0	0	0	0	0	0	0
Melatonin enhances salt tolerance by promoting MYB108A-mediated ethylene biosynthesis in grapevines	Xu, Lili; Xiang, Guangqing; Sung, Qinghua; Ni, Yong; Jin, Zhongxin; Gao, Shiwei; Yao, Yuxin	The signal molecules melatonin and ethylene play key roles in abiotic stress tolerance. The interplay between melatonin and ethylene in regulating salt tolerance and the underlying molecular mechanism of this interplay remain unclear. Here, we found that both melatonin and 1-aminocyclopropane-1-carboxylic acid (ACC, a precursor of ethylene) enhanced the tolerance of grapevine to NaCl; additionall…	HORTICULTURE RESEARCH	2019	10.1038/s41438-019-0197-4	Xu, Lili	Yao, Yuxin	7	0	0	0	0	0	0	0	0	0	0	0	0	0	0	0	0	0	0	0	0	0	0	0	0	0	0	0	0	0	0	0	0	0	0	0	0	0	0	0	0	0
Melatonin Deficiency Confers Tolerance to Multiple Abiotic Stresses in Rice via Decreased Brassinosteroid Levels	Hwang, Ok Jin; Back, Kyoungwhan	Melatonin has long been recognized as a positive signaling molecule and potent antioxidant in plants, which alleviates damage caused by adverse conditions such as salt, cold, and heat stress. In this study, we found a paradoxical role for melatonin in abiotic stress responses. Suppression of the serotonin N-acetyltransferase 2 (snat2) gene encoding the penultimate enzyme in melatonin biosynthesis…	INTERNATIONAL JOURNAL OF MOLECULAR SCIENCES	2019	10.3390/ijms20205173	Hwang, Ok Jin	Back, Kyoungwhan	2	0	1	1	0	0	0	0	0	0	0	0	0	0	0	0	0	0	0	0	0	0	0	0	0	0	0	1	0	0	0	0	0	0	1	0	0	0	0	0	0	0
Potential roles of melatonin and sulfur in alleviation of lanthanum toxicity in tomato seedlings	Siddiqui, Manzer H.; Alamri, Saud; Alsubaie, Qasi D.; Ali, Hayssam M.; Ibrahim, Abdullah A.; Alsadon, Abdullah	Owing to the active use of rare-earth elements in many areas, it is necessary to study their behavior in the environment and their biological impact on plants. Despite the role of melatonin and sulfur in plant growth, development and abiotic stress tolerance; it is still not clear how they have a strong regulatory influence and synergistic effect on growth, physiological and biochemical character…	ECOTOXICOLOGY AND ENVIRONMENTAL SAFETY	2019	10.1016/j.ecoenv.2019.05.043	Siddiqui, Manzer H.	Alsadon, Abdullah	6	0	0	0	0	0	0	0	0	0	0	0	0	0	0	0	0	0	0	0	0	0	0	0	0	0	0	0	1	0	0	0	0	0	1	0	0	0	0	0	0	0
Effects of Exogenous Application of Melatonin on Quality and Sugar Metabolism in Zaosu' Pear Fruit	Liu, Jianlong; Yue, Rongrong; Si, Min; Wu, Meng; Cong, Liu; Zhai, Rui; Yang, Chengquan; Wang, Zhigang; Ma, Fengwang; Xu, Lingfei	Melatonin (MT) modulates a wide range of physiological functions with pleiotropic effects in plants. In this study, we studied the effect of exogenous applications of MT to pear trees on indicators of pear fruit quality. The results showed that MT increased the size of pear fruit by improving the net photosynthetic rate and maximal quantum efficiency of photosystem II photochemistry during the la…	JOURNAL OF PLANT GROWTH REGULATION	2019	10.1007/s00344-019-09921-0	Liu, Jianlong	Xu, Lingfei	10	0	0	0	1	0	0	0	0	0	0	0	0	0	0	0	0	0	0	0	0	0	0	1	0	0	0	0	0	0	0	0	0	0	0	0	0	0	0	0	0	0
Strand-specific RNA-seq based identification and functional prediction of lncRNAs in response to melatonin and simulated drought stresses in cassava	Ding, Zehong; Wu, Chunlai; Tie, Weiwei; Yan, Yan; He, Guangyuan; Hu, Wei	Melatonin (MT) plays important roles in mediating plant responses to abiotic stresses such as drought. lncRNAs also play crucial roles in regulating responses to drought stress, however, their roles in MT-mediated drought stress responses in plants remain largely unknown. In this study, a total of 1405 high-confidence lncRNAs were identified in leaves of cassava, an important food crop in tropica…	PLANT PHYSIOLOGY AND BIOCHEMISTRY	2019	10.1016/j.plaphy.2019.05.008	Ding, Zehong	Hu, Wei	6	0	0	0	0	0	0	0	0	0	0	0	0	0	0	0	0	0	0	0	0	0	0	1	0	0	0	0	0	0	0	0	0	0	0	0	0	0	0	0	0	0
Overexpression of the Melatonin Synthesis-Related Gene SlCOMT1 Improves the Resistance of Tomato to Salt Stress	Liu, Dan-Dan; Sun, Xiao-Shuai; Liu, Lin; Shi, Hong-Di; Chen, Sui-Yun; Zhao, Da-Ke	Melatonin can increase plant resistance to stress, and exogenous melatonin has been reported to promote stress resistance in plants. In this study, a melatonin biosynthesis-related SlCOMT1 gene was cloned from tomato (Solanum lycopersicum Mill. cv. Ailsa Craig), which is highly expressed in fruits compared with other organs. The protein was found to locate in the cytoplasm. Melatonin content in S…	MOLECULES	2019	10.3390/molecules24081514	Liu, Dan-Dan	Zhao, Da-Ke	6	0	0	0	0	0	0	0	0	0	0	0	0	0	0	0	0	0	0	0	0	0	0	0	0	0	1	0	1	0	0	0	0	0	0	0	0	0	0	0	0	0
Postharvest exogenous melatonin treatment of strawberry reduces postharvest spoilage but affects components of the aroma profile	El-Mogy, Mohamed M.; Ludlow, Richard A.; Roberts, Callum; Muller, Carsten T.; Roger, Hilary J.	BACKGROUND: Strawberries are perishable fruits that decay quickly after harvest, but are valued for their distinctive taste and aroma. Melatonin is involved in plant resistance against stress, plant senescence and fruit ripening, and was shown to delay post-harvest spoilage of strawberries. OBJECTIVE: The effects of melatonin postharvest treatment on shelf-life and volatile organic compound profi…	JOURNAL OF BERRY RESEARCH	2019	10.3233/JBR-180361	El-Mogy, Mohamed M.	Roger, Hilary J.	5	0	0	0	1	0	0	0	0	0	0	0	0	0	0	0	0	0	0	0	0	0	0	0	0	0	0	0	0	0	0	0	0	0	0	0	0	1	0	0	0	0
Genome-Wide Analysis of Watermelon HSP20s and Their Expression Profiles and Subcellular Locations under Stresses	He, Yanjun; Fan, Min; Sun, Yuyan; Li, Lili	Watermelon (Citrullus lanatus L.), which is an economically important cucurbit crop that is cultivated worldwide, is vulnerable to various adverse environmental conditions. Small heat shock protein 20s (HSP20s) are the most abundant plant HSPs and they play important roles in various biotic and abiotic stress responses. However, they have not been systematically investigated in watermelon. In thi…	INTERNATIONAL JOURNAL OF MOLECULAR SCIENCES	2019	10.3390/ijms20010012	He, Yanjun	Li, Lili	4	0	0	0	0	0	0	0	0	0	0	0	0	0	0	0	0	0	0	0	0	0	0	0	0	0	0	0	0	0	0	0	0	0	0	0	0	0	0	1	0	0
Melatonin and related bioactive compounds in commercialized date palm fruits (Phoenix dactylifera L.): correlation with some antioxidant parameters	Verde, Antia; Miguez, Jesus M.; Gallardo, Mercedes	The presence of melatonin in plant foodstuffs is a matter of growing interest since its antioxidant properties and the possible benefits for health of consumers. Fruits of date palm (Phoenix dactylifera, L.) are highly appreciated because of their nutritional value and healthy properties related to high content in antioxidant compounds present in them. In this study, we show that dates' antioxida…	EUROPEAN FOOD RESEARCH AND TECHNOLOGY	2019	10.1007/s00217-018-3139-8	Verde, Antia	Gallardo, Mercedes	3	0	0	0	0	0	0	0	0	0	0	0	0	0	0	0	0	0	0	0	0	0	0	0	1	0	0	0	0	0	0	0	0	0	0	0	0	0	0	0	0	0
Melatonin Treatment Inhibits the Growth of Xanthomonas oryzae pv. oryzae	Chen, Xian; Sun, Cheng; Laborda, Pedro; Zhao, Yancun; Palmer, Ian; Fu, Zheng Qing; Qiu, Jingping; Liu, Fengquan	Xanthomonas oryzae pv. oryzae (Xoo) causes rice bacterial blight (BB), one of the most widespread and destructive diseases in rice-growing regions worldwide. Melatonin enhances pathogen resistance by inducing plant innate immunity, but the direct effect of melatonin on plant pathogenic bacteria is poorly understood. In this study, we investigated the direct effects of melatonin on Xoo. Exogenous …	FRONTIERS IN MICROBIOLOGY	2018	10.3389/fmicb.2018.02280	Chen, Xian	Liu, Fengquan	8	0	1	1	0	0	0	0	0	0	0	0	0	0	0	0	0	0	0	0	0	0	0	1	0	0	0	0	0	0	0	0	0	0	0	0	0	0	0	0	0	0
Growth, physiology, and transcriptional analysis of Two contrasting Carex rigescens genotypes under Salt stress reveals salt-tolerance mechanisms	Li, Mingna; Zhang, Kun; Sun, Yan; Cui, Huiting; Cao, Shihao; Yan, Li; Xu, Mengxin	Salt stress is a major abiotic stress threatening plant growth and development throughout the world. In this study, we investigated the salt stress adaptation mechanism of Carex rigescens (Franch.) V. Krecz, a stress-tolerant turfgrass species with a wide distribution in northern China. Specifically, we analyzed the growth, physiology, and transcript expression patterns of two C. rigescens genoty…	JOURNAL OF PLANT PHYSIOLOGY	2018	10.1016/j.jplph.2018.07.005	Li, Mingna	Xu, Mengxin	7	0	0	0	0	0	0	0	0	0	0	0	0	0	0	0	0	0	0	0	0	0	0	0	0	0	0	1	0	0	0	0	0	0	0	0	0	0	0	0	0	0
Physiological and biochemical analyses reveal drought tolerance in cool-season tall fescue (Festuca arundinacea) turf grass with the application of melatonin	Alama, Mohammad Nur; Wang, Yanping; Chan, Zhulong	Tall fescue (Festuca arundinacea Schreb.) is a widely used, cool-season turf grass and is relatively sensitive to water stress. Melatonin has been reported to improve abiotic stress tolerance in many plants. In this study, we demonstrated that, although shoot height and fresh weight of tall fescue seedlings were significantly reduced by drought stress, they were increased by melatonin pre-treatme…	CROP & PASTURE SCIENCE	2018	10.1071/CP18394	Alama, Mohammad Nur	Chan, Zhulong	3	0	0	1	0	0	0	0	0	0	0	0	0	0	0	0	0	0	0	0	0	0	0	0	0	0	0	1	0	0	0	0	0	0	1	0	0	0	0	0	0	0
Overexpression of ovine AANAT and HIOMT genes in switchgrass leads to improved growth performance and salt-tolerance	Huang, Yan-Hua; Liu, Si-Jia; Yuan, Shan; Guan, Cong; Tian, Dan-Yang; Cui, Xin; Zhang, Yun-Wei; Yang, Fu-Yu	Melatonin is a well-known bioactive molecule with an array of health-promoting properties. Here, we detected the physiological function of melatonin in transgenic switchgrass overexpressing the homologous sheep arylalkylamine N-acetyltransferase and hydroxyindole O-methyltransferase genes, which catalyze the last two steps of melatonin synthesis. Compared to the wild-type (WT) and transgenic cont…	SCIENTIFIC REPORTS	2017	10.1038/s41598-017-12566-2	Huang, Yan-Hua	Yang, Fu-Yu	8	0	1	0	0	0	0	0	0	0	0	0	0	0	0	0	0	0	0	0	0	0	0	0	0	0	0	0	0	0	1	0	0	0	0	0	0	0	0	0	0	0
Melatonin alleviates cold-induced oxidative damage by regulation of ascorbate-glutathione and proline metabolism in melon seedlings (Cucumis melo L.)	Zhang, Y. P.; Xu, S.; Yang, S. J.; Chen, Y. Y.	Cold stress is one of the most detrimental environmental factors affecting plant growth and development. Melatonin (MEL), a natural indoleamine compound, responds to various environmental cues. To explore the role of MEL in the response of melon (Cucumis melo L.) seedlings to cold stress, the effects of exogenous MEL on the ascorbate-glutathione (AsA-GSH) cycle and proline metabolism were investi…	JOURNAL OF HORTICULTURAL SCIENCE & BIOTECHNOLOGY	2017	10.1080/14620316.2016.1266915	Zhang, Y. P.	Chen, Y. Y.	4	0	0	1	0	0	0	0	0	0	0	0	0	0	0	0	0	0	0	0	0	0	0	1	0	0	0	1	0	0	0	0	0	0	0	0	0	0	0	0	0	0
Development and Validation of New Ultra-High-Performance Liquid Chromatography-Hybrid Quadrupole-Orbitrap Mass Spectrometry Method for Determination of Melatonin in Fruits	Reinholds, Ingars; Pugajeva, Iveta; Radenkovs, Vitalijs; Rjabova, Jekaterina; Bartkevics, Vadims	A new reliable analytical method based on ultra-high-performance liquid chromatography coupled with hybrid quadrupole-Orbitrap mass spectrometry was developed for the analysis of melatonin (MEL) in food products. In-house validation was performed using deuterated melatonin (MEL-d4) as an internal standard to ensure method selectivity and accuracy and to evaluate the efficiency of a robust ethyl a…	JOURNAL OF CHROMATOGRAPHIC SCIENCE	2016	10.1093/chromsci/bmw030	Reinholds, Ingars	Bartkevics, Vadims	5	0	0	0	0	0	0	0	0	0	0	0	0	0	0	0	0	0	0	0	0	0	0	0	0	0	0	0	0	0	0	0	0	0	0	0	0	0	0	0	0	0
Evaluation of ploidy variations in Hypericum perforatum L. (St. John's wort) germplasm from seeds, in vitro germplasm collection, and regenerants from floral cultures	Alan, Ali R.; Murch, Susan J.; Saxena, Praveen K.	Hypericum perforatum L. (St. John's wort) is an important medicinal herb and a subject of intensive research for its complex and diverse bioactive chemicals. An in vitro-grown germplasm collection of elite H. perforatum lines, established to provide easy access to physiologically uniform plants, was used for ploidy assessment studies. Germplasm lines were maintained by repeated subculture of shoo…	IN VITRO CELLULAR & DEVELOPMENTAL BIOLOGY-PLANT	2015	10.1007/s11627-015-9708-7	Alan, Ali R.	Saxena, Praveen K.	3	0	0	0	0	0	0	0	0	0	0	0	0	0	0	0	0	0	0	0	0	0	0	0	0	0	0	0	0	0	0	0	0	0	0	0	0	0	0	0	0	0
Melatonin mitigates cadmium and aluminium toxicity through modulation of antioxidant potential inBrassica napusL	Sami, A.; Shah, F. A.; Abdullah, M.; Zhou, X.; Yan, Y.; Zhu, Z.; Zhou, K.	Melatonin has emerged as an essential molecule in plants, due to its role in defence against metal toxicity. Aluminium (Al) and cadmium (Cd) toxicity inhibit rapeseed seedling growth. In this study, we applied different doses of melatonin (50 and 100 mu m) to alleviate Al (25 mu m) and Cd (25 mu m) stress in rapeseed seedlings. Results show that Al and Cd caused toxicity in rapeseed seedling, as …	PLANT BIOLOGY	2020	10.1111/plb.13093	Sami, A.	Zhou, K.	7	0	0	0	0	0	0	0	0	0	0	0	0	0	0	0	0	0	0	0	0	0	0	0	1	0	1	1	1	0	0	0	0	0	1	0	0	1	0	0	0	0
Melatonin alleviates nickel phytotoxicity by improving photosynthesis, secondary metabolism and oxidative stress tolerance in tomato seedlings	Jahan, Mohammad Shah; Guo, Shirong; Baloch, Abdul Raziq; Sun, Jin; Shu, Sheng; Wang, Yu; Ahammed, Golam Jalal; Kabir, Khairul; Roy, Rana	Arable land contamination with nickel (Ni) has become a major threat to worldwide crop production. Recently, melatonin has appeared as a promising stress-relief substance that can alleviate heavy metal-induced phytotoxicity in plants. However, the plausible underlying mechanism of melatonin function under Ni stress has not been fully substantiated in plants. Herein, we conducted an experiment tha…	ECOTOXICOLOGY AND ENVIRONMENTAL SAFETY	2020	10.1016/j.ecoenv.2020.110593	Jahan, Mohammad Shah	Roy, Rana	9	0	0	0	0	0	0	0	0	0	0	0	0	0	0	0	0	0	0	0	0	0	0	1	0	0	1	1	1	0	0	1	0	0	1	0	0	1	0	0	0	0
Combined Application of Arbuscular Mycorrhizal Fungi and Exogenous Melatonin Alleviates Drought Stress and Improves Plant Growth in Tobacco Seedlings	Liu, Ling; Li, Dong; Ma, Yilin; Shen, Hongtao; Zhao, Shimin; Wang, Yanfang	Studies have shown that the application of arbuscular mycorrhizal (AM) fungi or exogenous melatonin (MT) can alleviate drought stress and improve plant growth, but the additive effects of both treatments on plants grown under drought stress are largely unknown. In this study, we conducted a pot experiment to investigate the effects of AM inoculation (Funneliformis mosseaeBGC XJ01) and/or MT appli…	JOURNAL OF PLANT GROWTH REGULATION	2020	10.1007/s00344-020-10165-6	Liu, Ling	Wang, Yanfang	6	0	1	1	1	0	0	0	0	0	0	0	0	0	0	0	0	0	0	0	0	0	0	0	0	0	0	0	0	0	0	0	0	0	1	0	0	0	0	0	0	0
Application of Melatonin-Enhanced Tolerance to High-Temperature Stress in Cherry Radish (Raphanus sativus L. var. radculus pers)	Jia, Chunhua; Yu, Xiaojing; Zhang, Min; Liu, Zhiguang; Zou, Peng; Ma, Jun; Xu, Yachun	The growth and development of cold-season plants are susceptible to high temperature. Melatonin is a plant growth regulator with potential to improve plant tolerance to biological and abiotic stresses. In our study, cherry radish (Raphanus sativus L. var. radculus pers) was cultured at a high temperature (35 degrees C/30 degrees C day/night) and different concentrations (0, 11.6, 17.4, 29.0, 34.8…	JOURNAL OF PLANT GROWTH REGULATION	2020	10.1007/s00344-019-10006-1	Jia, Chunhua	Xu, Yachun	7	0	0	0	0	0	0	0	0	0	0	0	0	0	0	0	0	0	0	0	0	0	0	0	0	0	0	0	0	0	0	0	0	0	1	1	0	0	0	1	0	0
SlSNAT Interacts with HSP40, a Molecular Chaperone, to Regulate Melatonin Biosynthesis and Promote Thermotolerance in Tomato	Wang, Xiaoyun; Zhang, Haijun; Xie, Qian; Liu, Ying; Lv, Hongmei; Bai, Ruyue; Ma, Rui; Li, Xiangdong; Zhang, Xichun; Guo, Yang-Dong; Zhang, Na	The SNAT enzyme participates in the biosynthesis of melatonin, which is reported to regulate thermotolerance in many plants. However, the mechanistic basis of this regulation remains unclear. In this study, we identified the SlSNAT gene, which is responsible for melatonin biosynthesis in tomato. SlSNAT expression levels were 3- and 5-fold higher in SlSNAT overexpression lines OX-2 and OX-6, respe…	PLANT AND CELL PHYSIOLOGY	2020	10.1093/pcp/pcaa018	Wang, Xiaoyun	Zhang, Na	11	0	0	0	0	0	0	0	0	0	0	0	0	0	0	0	0	0	0	0	0	0	0	0	0	0	0	0	0	0	0	0	0	0	0	0	0	0	0	0	0	0
Alkanes (C29 and C31)-Mediated Intracuticular Wax Accumulation Contributes to Melatonin- and ABA-Induced Drought Tolerance in Watermelon	Li, Hao; Guo, Yanliang; Cui, Qi; Zhang, Zixing; Yan, Xing; Ahammed, Golam Jalal; Yang, Xiaozhen; Yang, Jianqiang; Wei, Chunhua; Zhang, Xian	As the outermost hydrophobic layer, cuticular waxes serve as an essential waterproof barrier to protect plants from desiccation, but the mechanism of wax accumulation still remains unclear. We analyzed the response of cuticular wax composition and deposition to drought in three different watermelon germplasms, namely, M20, M08, and J5F, which showed similar stomatal response, but high, moderate, …	JOURNAL OF PLANT GROWTH REGULATION	2020	10.1007/s00344-020-10099-z	Li, Hao	Zhang, Xian	10	0	0	0	0	0	0	0	0	0	0	0	0	0	0	0	0	0	0	0	0	0	0	0	0	0	0	0	0	0	0	0	0	0	0	0	0	0	0	1	0	0
2-Hydroxymelatonin mitigates cadmium stress in cucumis sativus seedlings: Modulation of antioxidant enzymes and polyamines	Shah, Anis Ali; Ahmed, Shakil; Ali, Aamir; Yasin, Nasim Ahmad	Cadmium level is continuously increasing in agricultural soils mainly due to anthropogenic activities. Cadmium is one of the most phytotoxic metals in the soils. The present study investigates the possible role of 2-hydroxymelatonin (2-OHMT) in assuagement of Cd-toxicity in cucumber (Cucumis sativus L.) plants. 2-OHMT is an important metabolite produced through interaction of melatonin with oxyge…	CHEMOSPHERE	2020	10.1016/j.chemosphere.2019.125308	Shah, Anis Ali	Yasin, Nasim Ahmad	4	0	0	0	0	0	0	1	0	1	0	0	0	0	0	0	0	0	0	0	0	0	0	0	1	0	1	1	1	0	0	0	0	0	0	0	0	0	0	0	0	0
Nitric oxide is involved in the regulation of melatonin-induced antioxidant responses in Catharanthus roseus roots under cadmium stress	Nabaei, Masoomeh; Amooaghaie, Rayhaneh	Nitric oxide (NO) and melatonin are two biostimulant molecules in plants that not only modulate the growth and development of plants but also confer enhanced tolerance to abiotic stresses. Therefore, in this study, the interactive effects of melatonin and nitric oxide (NO) on seedlings of Catharanthus roseus (L.) G. Don was evaluated under both control and conditions of stress due to Cd. Our resu…	BOTANY	2019	10.1139/cjb-2019-0107	Nabaei, Masoomeh	Amooaghaie, Rayhaneh	2	0	0	0	0	0	0	0	0	0	0	0	0	0	0	0	0	0	0	0	0	0	0	0	1	1	1	0	0	0	0	0	0	0	0	0	0	0	0	0	0	0
Molecular cloning and characterization of a grapevine (Vitis vinifera L.) serotonin N-acetyltransferase (VvSNAT2) gene involved in plant defense	Yu, Yihe; Bian, Lu; Jiao, Zeling; Yu, Keke; Wan, Yutong; Zhang, Guohai; Guo, Dalong	Background Melatonin is a ubiquitous molecule and exists across kingdoms. Studies on melatonin in plants have mainly focused on its physiological influence on growth and development, and on its biosynthesis. A number of studies have been conducted on the melatonin content and exogenous melatonin treatment of grapevine (Vitis vinifera L.). However, key genes or enzymes of the melatonin biosyntheti…	BMC GENOMICS	2019	10.1186/s12864-019-6085-3	Yu, Yihe	Guo, Dalong	7	0	0	0	0	0	0	0	0	0	0	0	0	0	0	0	0	0	0	0	0	0	0	0	0	0	0	0	0	0	0	0	0	0	1	0	0	0	0	0	0	1
2-Hydroxymelatonin induced nutritional orchestration in Cucumis sativus under cadmium toxicity: modulation of non-enzymatic antioxidants and gene expression	Shah, Anis Ali; Ahmed, Shakil; Yasin, Nasim Ahmad	2-Hydroxymelatonin (2-OHMT) is an important metabolite produced through melatonin interaction with oxygenated compounds. 2-OHMT pretreated seeds (50 mu M, 100 mu M, and 150 mu M) were grown in soil contaminated with 50 mg kg(-1) cadmium. Cadmium imposed stress reduced seed germination, growth, biomass production, and chlorophyll (Chl) content in Cucumis sativus seedlings. 2-OHMT application empha…	INTERNATIONAL JOURNAL OF PHYTOREMEDIATION	2020	10.1080/15226514.2019.1683715	Shah, Anis Ali	Yasin, Nasim Ahmad	3	0	0	0	0	0	0	1	0	1	0	0	0	0	0	0	0	0	0	0	0	0	1	0	1	0	0	0	0	0	0	0	0	0	1	0	0	0	0	0	0	0
Knockdown of the chitin-binding protein family gene CaChiIV1 increased sensitivity to Phytophthora capsici and drought stress in pepper plants	Ali, Muhammad; Gai, Wen-Xian; Khattak, Abdul Mateen; Khan, Abid; Ul Haq, Saeed; Ma, Xiao; Wei, Ai-Min; Muhammad, Izhar; Jan, Ibadullah; Gong, Zhen-Hui	Phytophthora capsici has been the most destructive pathogen of pepper plants (Capsicum annuum L.), possessing the ability to quickly overcome the host defense system. In this context, the chitin-binding protein (CBP) family member CaChiIV1 regulates the response to P. capsici and abiotic stresses. The relevance of functional characterization and regulation of CaChiIV1 has not been explored in hor…	MOLECULAR GENETICS AND GENOMICS	2019	10.1007/s00438-019-01583-7	Ali, Muhammad	Gong, Zhen-Hui	10	0	0	0	0	0	0	0	0	0	0	0	0	0	0	0	0	0	0	0	0	0	0	0	0	0	1	1	0	0	0	0	0	0	1	0	0	0	0	0	0	0
Effect of exogenous melatonin on resistance of cucumber to downy mildew	Sun, Yunkuo; Liu, Zeyu; Lan, Guangpu; Jiao, Congjian; Sun, Yan	Downy mildew, caused by Pseudoperonospora cubensis, is a major threat to cucumber (Cucumis sativus) production. An increase in the disadvantages associated with chemical controls has prompted the need for alternative protecting agents. We analyzed the effects of melatonin pretreatment on resistance of cucumber to downy mildew. Application of 100 mu mol L-1 melatonin enhanced the activity of antio…	SCIENTIA HORTICULTURAE	2019	10.1016/j.scienta.2019.04.057	Sun, Yunkuo	Sun, Yan	5	0	0	0	1	0	0	0	0	0	0	0	0	0	0	0	0	0	0	0	0	0	0	1	0	0	0	1	0	0	0	0	0	0	1	0	0	0	0	0	0	0
Physiological and iTRAQ-based proteomic analyses reveal that melatonin alleviates oxidative damage in maize leaves exposed to drought stress	Su, Xiaoyu; Fan, Xiaocong; Shao, Ruixin; Guo, Jiameng; Wang, Yongchao; Yang, Jianping; Yang, Qinghua; Guo, Lin	To explain the underlying mechanism of melatonin-mediated drought stress responses in maize, maize pretreated with or without melatonin was subjected to 20% PEG nutrient solution to induce drought stress. We found that exogenous melatonin significantly improved drought tolerance, demonstrated by improved photosynthesis, reduced ROS accumulation, enhanced activities of superoxide dismutase (SOD), …	PLANT PHYSIOLOGY AND BIOCHEMISTRY	2019	10.1016/j.plaphy.2019.07.012	Su, Xiaoyu	Guo, Lin	8	0	0	0	0	0	0	0	0	0	0	0	0	0	0	0	0	0	0	0	0	0	0	0	0	0	0	0	1	0	0	0	0	0	0	0	0	0	0	0	0	0
Exogenous melatonin improves seed germination in Limonium bicolor under salt stress	Li, Junpeng; Zhao, Chen; Zhang, Mingjing; Yuan, Fang; Chen, Min	Melatonin involves in improving tolerance to abiotic and biotic stresses by regulating various biological processes. However, little is known about the underlying mechanism. Here, we investigated the effects of exogenous melatonin on seed germination in the halophyte Limonium bicolor under salt stress. Specifically, we examined the effect of salt stress on seed germination, melatonin concentratio…	PLANT SIGNALING & BEHAVIOR	2019	10.1080/15592324.2019.1659705	Li, Junpeng	Chen, Min	5	0	0	0	1	0	0	0	0	0	0	0	0	0	0	0	0	0	0	0	0	0	0	0	0	0	0	0	0	0	0	0	0	0	0	0	0	0	0	1	1	0
Melatonin promotes plant growth by maintaining integration and coordination between carbon and nitrogen metabolisms	Erdal, Serkan	Key messageMelatonin-induced growth promotion of maize seedlings is associated with maintaining coordination between gene expressions and activities of key enzymes involved in carbon and nitrogen metabolisms.AbstractMelatonin is a pleiotropic molecule that influences many diverse actions to enhance plant growth. The effect of melatonin on maintaining a necessary balance between carbon and nitroge…	PLANT CELL REPORTS	2019	10.1007/s00299-019-02423-z	#VALUE!	#VALUE!	1	0	1	1	0	0	0	0	0	0	0	0	0	0	0	0	0	0	0	0	0	0	0	1	0	0	0	0	0	0	0	0	0	0	1	0	0	0	0	0	0	0
Exogenous application of melatonin improves eradication of apple stem grooving virus from the infected in vitro shoots by shoot tip culture	Chen, L.; Wang, M. -R.; Li, J. -W.; Feng, C. -H.; Cui, Z. -H.; Zhao, L.; Wang, Q. -C.	Production and maintenance of virus-free planting materials is pivotal for the control of viral diseases. The present study attempted to test exogenous application of melatonin for eradication of apple stem grooving virus (ASGV) from virus-infected in vitro shoots of apple cultivar Gala. Exogenous application of 15 mu m melatonin to the shoot proliferation medium significantly increased the numbe…	PLANT PATHOLOGY	2019	10.1111/ppa.13018	Chen, L.	Wang, Q. -C.	7	0	0	0	1	0	0	0	0	0	0	0	0	0	0	0	0	0	0	0	0	0	0	0	0	0	0	0	0	0	0	0	0	0	0	0	0	0	0	0	0	0
Plant hormone treatments to alleviate the effects of salt stress on germination of Betula platyphylla seeds	Li, Zhixin; Pei, Xiaona; Yin, Shaopeng; Lang, Xianbo; Zhao, Xiyang; Qu, Guan-Zheng	We analyzed the germination traits (germination rate, germination potential, and germination index) of seeds from 23 half-sib families of birch (Betula platyphylla). The germination rates of the 23 families ranged from 38.57 to 76.50%. Seeds from the eight families germinating at the highest rates were then used for germination experiments under salt stress. Germination rate, germination potentia…	JOURNAL OF FORESTRY RESEARCH	2019	10.1007/s11676-018-0661-2	Li, Zhixin	Qu, Guan-Zheng	6	0	0	0	0	0	0	0	0	0	0	0	0	0	0	0	0	0	0	0	0	0	0	0	0	0	0	0	0	0	0	0	0	0	0	0	0	0	0	0	0	0
Transcriptomic and Metabolic Insights into the Distinctive Effects of Exogenous Melatonin and Gibberellin on Terpenoid Synthesis and Plant Hormone Signal Transduction Pathway in Camellia sinensis	Di, Taimei; Zhao, Lei; Chen, Huimin; Qian, Wenjun; Wang, Peiqiang; Zhang, Xinfu; Xia, Tao	Melatonin and gibberellin are bioactive molecules in plants. In the present study, the role of exogenous melatonin (MT) and gibberellin (GA) in the tea plant was explored by transcriptome and metabolic analysis. Results showed that the growth of tea plant was enhanced by MT treatment. The pathways of terpenoid synthesis and plant pathogen interaction were significantly strengthened, combined with…	JOURNAL OF AGRICULTURAL AND FOOD CHEMISTRY	2019	10.1021/acs.jafc.9b00503	Di, Taimei	Xia, Tao	7	0	1	1	1	0	0	0	0	0	0	0	0	0	0	0	0	0	0	0	0	0	0	0	0	0	0	0	0	0	0	0	0	0	0	0	0	0	0	0	1	0
Assessment of Tryptophan, Tryptophan Ethylester, and Melatonin Derivatives in Red Wine by SPE-HPLC-FL and SPE-HPLC-MS Methods	Fracassetti, Daniela; Vigentini, Ileana; Lo Faro, Alfredo Fabrizio Francesco; De Nisi, Patrizia; Foschino, Roberto; Tirelli, Antonio; Orioli, Marica; Iriti, Marcello	Melatonin (MEL) is an indoleamine produced mainly by the pineal gland in vertebrates. It plays a significant role in the regulation of circadian rhythms, mitigation of sleeping disorders, and jet lag. This compound is synthetized from tryptophan (TRP) and it has been found in seeds, fruits, and fermented beverages, including wine. Wine is also a source of other tryptophan derivatives, the tryptop…	FOODS	2019	10.3390/foods8030099	Fracassetti, Daniela	Iriti, Marcello	8	0	1	1	0	0	0	0	0	0	0	0	0	0	0	0	0	0	0	0	0	0	0	0	0	0	0	0	0	0	0	0	0	0	0	0	0	0	0	0	0	0
Exogenous melatonin improves lead tolerance of bermudagrass through modulation of the antioxidant defense system	Xie, Chengcheng; Xiong, Xi; Huang, Zhuo; Sun, Lingxia; Ma, Jun; Cai, Shizhen; Yu, Fei; Zhong, Woxiu; Chen, Shuyu; Li, Xi	Lead (Pb) is a major anthropogenic contaminant that can be devastating on both animals and plants. It is essential to develop methods to decrease the Pb contaminant in soil by phytoremediation using plants that are tolerance to Pb. In this study, we investigated the tolerance of bermudagrass (Cynodon dactylon (L.) Pers.) and the role of exogenous application of melatonin for improving its toleran…	INTERNATIONAL JOURNAL OF PHYTOREMEDIATION	2018	10.1080/15226514.2018.1488813	Xie, Chengcheng	Li, Xi	10	0	1	0	1	0	0	0	0	0	0	0	0	0	0	0	0	0	0	0	0	0	0	0	1	0	1	0	1	0	0	0	0	0	0	0	0	0	0	0	0	0
RNA-seq approach to analysis of gene expression profiles in dark green islands and light green tissues of Cucumber mosaic virus-infected Nicotiana tabacum	Chen, Lijuan; Fei, Chunyan; Zhu, Lin; Xu, Zhenpeng; Zou, Wenshan; Yang, Ting; Lin, Honghui; Xi, Dehui	Dark green islands (DGIs) surrounded by light green tissues (LGTs) are common leaf symptoms of plants that are systemically infected by various viruses that induce leaf mosaic in infected plants. The inoculation of Cucumber mosaic virus (CMV) in Nicotiana tabacum produced a commonly occurring sequence of classic patterns of DGIs and LGTs. Previous studies confirmed that there are significant diff…	PLOS ONE	2017	10.1371/journal.pone.0175391	Chen, Lijuan	Xi, Dehui	8	0	0	0	0	0	0	0	0	0	0	0	0	0	0	0	0	0	0	0	0	0	0	1	0	0	0	0	0	0	0	0	1	0	1	0	0	0	0	0	0	0
Plant signals during beetle (Scolytus multistriatus) feeding in American elm (Ulmus americana Planch)	Saremba, Brett M.; Tymm, Fiona J. M.; Baethke, Kathy; Rheault, Mark R.; Sherif, Sherif M.; Saxena, Praveen K.; Murch, Susan J.	American Elms were devastated by an outbreak of Dutch Elm Disease is caused by the fungus Ophiostoma novo-ulmi Brasier that originated in Asia and arrived in the early 1900s. In spite of decades of study, the specific mechanisms and disease resistance in some trees is not well understood. the fungus is spread by several species of bark beetles in the genus Scolytus, during their dispersal and fee…	PLANT SIGNALING & BEHAVIOR	2017	10.1080/15592324.2017.1296997	Saremba, Brett M.	Murch, Susan J.	7	1	1	1	0	0	0	0	0	0	0	0	0	0	0	0	0	0	0	0	0	0	0	0	0	0	0	0	0	0	0	0	0	0	0	0	0	0	0	0	0	0
RNA-seq Analysis of Overexpressing Ovine AANAT Gene of Melatonin Biosynthesis in Switchgrass	Yuan, Shan; Huang, Yanhua; Liu, Sijia; Guan, Cong; Cui, Xin; Tian, Danyang; Zhang, Yunwei; Yang, Fuyu	Melatonin serves important functions in the promotion of growth and anti stress regulation by efficient radical scavenging and regulation of antioxidant enzyme activity in various plants. To investigate its regulatory roles and metabolism pathways, the transcriptomic profile of overexpressing the ovine arylalkylamine N-acetyltransferase (oAANAT) gene, encoding the penultimate enzyme in melatonin …	FRONTIERS IN PLANT SCIENCE	2016	10.3389/fpls.2016.01289	Yuan, Shan	Yang, Fuyu	8	1	1	1	0	0	0	0	0	0	0	0	0	0	0	0	0	0	0	0	0	0	0	1	0	0	0	0	0	0	0	0	0	0	0	0	0	0	0	0	0	0
Comparative Analysis of Therapeutically Important Indole Compounds in in vitro Cultures of Hypericum perforatum Cultivars by HPLC and TLC Analysis Coupled with Densitometric Detection	Muszynska, Bozena; Ekiert, Halina; Kwiecien, Inga; Maslanka, Anna; Zodi, Rawad; Beerhues, Ludger	Five indole compounds (5-hydroxy-L-tryptophan, L-tryptophan, indole-3-acetic acid, melatonin, serotonin) and hypericin were identified and quantified in methanolic extracts of shoot cultures of three Hypericum perforatum cultivars (Helos, Elixir, Topas) growing on two variants of Murashige -Skoog medium differing in concentrations of growth regulators (naphthalene-l-acetic acid and 6-benzylaminop…	NATURAL PRODUCT COMMUNICATIONS	2014		Muszynska, Bozena	Beerhues, Ludger	6	0	0	0	0	0	0	0	0	0	0	0	0	0	0	0	0	0	0	0	0	0	0	0	0	0	0	0	0	0	0	0	0	0	0	0	0	0	0	0	0	0
Melatonin improves rice salinity stress tolerance by NADPH oxidase-dependent control of the plasma membrane K+ transporters and K+ homeostasis	Liu, Juan; Shabala, Sergey; Zhang, Jing; Ma, Guohui; Chen, Dandan; Shabala, Lana; Zeng, Fanrong; Chen, Zhong-Hua; Zhou, Meixue; Venkataraman, Gayatri; Zhao, Quanzhi	This study aimed to reveal the mechanistic basis of the melatonin-mediated amelioration of salinity stress in plants. Electrophysiological experiments revealed that melatonin decreased salt-induced K+ efflux (a critical determinant of plant salt tolerance) in a dose- and time-dependent manner and reduced sensitivity of the plasma membrane K+-permeable channels to hydroxyl radicals. These benefici…	PLANT CELL AND ENVIRONMENT	2020	10.1111/pce.13759	Liu, Juan	Zhao, Quanzhi	11	0	1	1	0	0	0	0	0	0	0	0	0	0	0	0	0	0	0	0	0	0	0	0	0	0	0	0	0	0	0	0	0	0	0	0	0	0	0	0	0	0
Melatonin Enhances Cold Tolerance by Regulating Energy and Proline Metabolism in Litchi Fruit	Liu, Gangshuai; Zhang, Yuxin; Yun, Ze; Hu, Meijiao; Liu, Jialiang; Jiang, Yueming; Zhang, Zhengke	Melatonin (MLT) is a vital signaling molecule that regulates multiple physiological processes in higher plants. In the current study, the role of MLT in regulating chilling tolerance and its possible mechanisms in litchi fruit during storage at ambient temperatures after its removal from refrigeration was investigated. The results show that the application of MLT (400 mu M, dipping for 20 min) to…	FOODS	2020	10.3390/foods9040454	Liu, Gangshuai	Zhang, Zhengke	7	0	0	0	0	0	0	0	0	0	0	0	0	0	0	0	0	0	0	0	0	0	0	1	0	0	0	1	0	0	0	0	0	0	0	0	0	1	0	0	0	0
Melatonin and nitric oxide enhance cadmium tolerance and phytoremediation efficiency in Catharanthus roseus (L.) G. Don	Nabaei, Masoomeh; Amooaghaie, Rayhaneh	In this study, a pot experiment was performed to evaluate the effects of foliar spray with sodium nitroprusside (200 mu M SNP) and melatonin (100 mu M) singly and in combination on tolerance and accumulation of cadmium (Cd) in Catharanthus roseus (L.) G. Don plants exposed to different levels of cadmium (0, 50, 100, and 200 mg Cd kg(-1) soil). The results showed that 50 mg kg(-1) Cd had no signif…	ENVIRONMENTAL SCIENCE AND POLLUTION RESEARCH	2020	10.1007/s11356-019-07283-4	Nabaei, Masoomeh	Amooaghaie, Rayhaneh	2	0	0	0	0	0	0	0	0	0	0	0	0	0	0	0	0	0	0	0	0	0	0	0	0	1	0	0	0	0	0	0	0	0	1	0	0	0	0	0	0	0
Protective mechanisms of melatonin against selenium toxicity in Brassica napus: insights into physiological traits, thiol biosynthesis and antioxidant machinery	Ulhassan, Zaid; Huang, Qian; Gill, Rafaqat Ali; Ali, Skhawat; Mwamba, Theodore Mulembo; Ali, Basharat; Hina, Faiza; Zhou, Weijun	Background The ubiquitous signaling molecule melatonin (N-acetyl-5-methoxytryptamine) (MT) plays vital roles in plant development and stress tolerance. Selenium (Se) may be phytotoxic at high concentrations. Interactions between MT and Se (IV) stress in higher plants are poorly understood. The aim of this study was to evaluate the defensive roles of exogenous MT (0 mu M, 50 mu M, and 100 mu M) ag…	BMC PLANT BIOLOGY	2019	10.1186/s12870-019-2110-6	Ulhassan, Zaid	Zhou, Weijun	8	0	1	0	0	0	0	0	0	0	0	0	0	0	0	0	0	0	0	0	0	0	0	0	1	0	0	0	0	0	0	0	0	0	0	0	0	0	0	0	0	0
Melatonin-Induced Transcriptome Variation of Rapeseed Seedlings under Salt Stress	Tan, Xiaoyu; Long, Weihua; Zeng, Liu; Ding, Xiaoyu; Cheng, Yong; Zhang, Xuekun; Zou, Xiling	Salt stress inhibits the production of all crop species, including rapeseed (Brassica napus L.), the second most widely planted oil crop species. Although melatonin was confirmed to alleviate salt stress in rapeseed seedlings recently, the mechanism governing the expression levels remains unknown. Therefore, the melatonin-induced transcriptome variation of salt-stressed seedlings was explored. In…	INTERNATIONAL JOURNAL OF MOLECULAR SCIENCES	2019	10.3390/ijms20215355	Tan, Xiaoyu	Zou, Xiling	7	0	0	0	0	0	0	0	0	0	0	0	0	0	0	0	0	0	0	0	0	0	0	1	0	0	0	0	0	0	0	0	0	0	0	0	0	0	0	0	1	0
Melatonin enhances cotton immunity to Verticillium wilt via manipulating lignin and gossypol biosynthesis	Li, Cheng; He, Qiuling; Zhang, Fan; Yu, Jingwen; Li, Cong; Zhao, Tianlun; Zhang, Yi; Xie, Qianwen; Su, Bangrong; Mei, Lei; Zhu, Shuijin; Chen, Jinhong	Plants endure challenging environments in which they are constantly threatened by diverse pathogens. The soil-borne fungus Verticillium dahliae is a devastating pathogen affecting many plant species including cotton, in which it significantly reduces crop yield and fiber quality. Melatonin involvement in plant immunity to pathogens has been reported, but the mechanisms of melatonin-induced plant …	PLANT JOURNAL	2019	10.1111/tpj.14477	Li, Cheng	Chen, Jinhong	12	0	1	1	0	0	0	0	0	0	0	0	0	0	0	0	0	0	0	0	0	0	0	0	0	0	0	0	0	0	0	0	0	0	0	0	0	0	0	0	0	0
Seed Priming with Melatonin Improves the Seed Germination of Waxy Maize under Chilling Stress via Promoting the Antioxidant System and Starch Metabolism	Cao, Qingjun; Li, Gang; Cui, Zhengguo; Yang, Fentuan; Jiang, Xiaoli; Diallo, Lamine; Kong, Fanli	Chilling stress is one of the major abiotic stresses affecting waxy maize plant growth. Melatonin (MT) is able to improve tolerance to abiotic stress in plants. To investigate the effects of seed priming with MT on tolerance to chilling stress in waxy maize, the seed germination characteristics and physiological parameters were tested with varied MT concentrations (0, 50, 100 mu M) and treatment …	SCIENTIFIC REPORTS	2019	10.1038/s41598-019-51122-y	Cao, Qingjun	Kong, Fanli	7	0	0	0	0	0	0	0	0	0	0	0	0	0	0	0	0	0	0	0	0	0	0	1	1	0	1	1	1	0	0	0	0	0	0	0	0	0	0	0	0	0
The bZIP gene family in watermelon: genome-wide identification and expression analysis under cold stress and root-knot nematode infection	Yang, Youxin; Li, Jingwen; Li, Hao; Yang, Yingui; Guang, Yelan; Zhou, Yong	The basic leucine zipper (bZIP) family transcription factors play crucial roles in regulating plant development and stress response. In this study, we identified 62 ClabZIP genes from watermelon genome, which were unevenly distributed across the 11 chromosomes. These ClabZIP proteins could be classified into 13 groups based on the phylogenetic relationships, and members in the same group showed s…	PEERJ	2019	10.7717/peerj.7878	Yang, Youxin	Zhou, Yong	6	0	0	0	0	0	0	0	0	0	0	0	0	0	0	0	0	0	0	0	0	0	0	0	0	0	0	0	0	0	0	0	0	0	0	0	0	0	0	0	0	0
Exogenous melatonin stimulated Amaryllidaceae alkaloid biosynthesis in in vitro cultures of Leucojum aestivum L	Ptak, Agata; Simlat, Magdalena; Moranska, Emilia; Skrzypek, Edyta; Warchol, Marzena; Tarakemeh, Ameneh; Laurain-Mattar, Dominique	Leucojum aestivum L. is a highly demanding pharmaceutical plant which is a natural source of pharmacologically active Amaryllidaceae alkaloids, especially galanthamine and lycorine. To establish an efficient method for the production of these alkaloids Leucojum aestivum plants derived from somatic embryos were subjected to various concentrations of melatonin (N-acetyl-5-methoxy tryptamine), NaCl …	INDUSTRIAL CROPS AND PRODUCTS	2019	10.1016/j.indcrop.2019.06.021	Ptak, Agata	Laurain-Mattar, Dominique	7	0	0	0	1	0	0	0	0	0	0	0	0	0	0	0	0	0	0	0	0	0	0	0	0	0	0	0	1	0	0	0	0	0	1	1	0	0	0	0	0	0
Suppression of Melatonin 2-Hydroxylase Increases Melatonin Production Leading to the Enhanced Abiotic Stress Tolerance against Cadmium, Senescence, Salt, and Tunicamycin in Rice Plants	Choi, Geun-Hee; Back, Kyoungwhan	Melatonin 2-hydroxylase (M2H) catalyzes the conversion of melatonin into 2-hydroxymelatonin (2OHM), which is present in plants at a higher concentration than melatonin. Although M2H has been cloned, the in vivo function of its product is unknown. Here, we generated stable T-2 homozygous transgenic rice plants in which expression of endogenous M2H was suppressed (RNAi lines). However, we failed to…	BIOMOLECULES	2019	10.3390/biom9100589	Choi, Geun-Hee	Back, Kyoungwhan	2	0	1	1	0	0	0	1	1	1	0	0	1	0	0	0	0	0	0	0	0	0	0	0	0	0	0	0	0	0	1	0	0	0	0	0	0	0	1	0	0	0
Exogenous application of melatonin mitigates the adverse effects of drought stress on morpho-physiological traits and secondary metabolites in Moldavian balm (Dracocephalum moldavica)	Naghizadeh, Mehdi; Kabiri, Rozita; Hatami, Ali; Oloumi, Hakimeh; Nasibi, Fatemeh; Tahmasei, Zahra	Melatonin has emerged as an important signaling molecule that regulates plant responses to environmental stresses. In this research, melatonin was used to alleviate the adverse effects of oxidative stress induced by water deficit in Moldavian balm (Dracocephalum moldavica) plants and morpho-physiological traits were investigated. This experiment was conducted as a factorial arrangement based on c…	PHYSIOLOGY AND MOLECULAR BIOLOGY OF PLANTS	2019	10.1007/s12298-019-00674-4	Naghizadeh, Mehdi	Tahmasei, Zahra	6	0	0	0	1	0	0	0	0	0	0	0	0	0	0	0	0	0	0	0	0	0	0	1	0	0	0	1	0	0	0	0	0	0	0	0	0	1	0	0	0	0
Striking effects of melatonin on secondary metabolites produced by callus culture of rosemary (Rosmarinus officinalis L.)	Coskun, Yasemin; Duran, Ragbet Ezgi; Kilic, Semra	In recent years, phytomelatonin has become even more important because of its numerous useful properties in plant metabolism. In this study, different concentrations of melatonin (MEL) (0, 100 and 200 mu M) were used to investigate the changes in the accumulation of phenolic compounds, and the aromatic content of rosemary (Rosmarinus officinalis L.) leaf explants by callus culture. MS medium supp…	PLANT CELL TISSUE AND ORGAN CULTURE	2019	10.1007/s11240-019-01605-7	Coskun, Yasemin	Kilic, Semra	3	0	0	0	0	0	0	0	0	0	0	0	0	0	0	0	0	0	0	0	0	0	0	1	0	1	0	0	0	0	0	0	0	0	0	0	0	0	0	0	0	0
Effects of melatonin on cadmium accumulation in the accumulator plant Perilla frutescens	Xiang, Gang; Lin, Lijin; Liao, Ming'an; Tang, Yi; Liang, Dong; Xia, Hui; Wang, Jin; Wang, Xun; Sun, Guochao; Zhang, Huifen; Zou, Yao; Ren, Wei	To enhance the phytoremediation ability of the heavy metal accumulator Perilla frutescens, melatonin (MT) was applied at different concentrations (0, 25, 50, 100, 150, and 200mol/L) to P.frutescens growing in cadmium (Cd) contaminated soil (10mg/kg). The MT treatments increased the root and shoot biomasses of P.frutescens, with the maximum increase in the 150mol/L MT treatment (79.51% and 36.18% …	CHEMISTRY AND ECOLOGY	2019	10.1080/02757540.2019.1600683	Xiang, Gang	Ren, Wei	12	0	0	0	0	0	0	0	0	0	0	0	0	0	0	0	0	0	0	0	0	0	0	0	0	0	0	0	1	0	0	0	0	0	1	0	0	0	0	0	0	0
Melatonin confers drought stress tolerance in soybean (Glycine max L.) by modulating photosynthesis, osmolytes, and reactive oxygen metabolism	Cao, L.; Jin, X. J.; Zhang, Y. X.	In order to investigate the role of melatonin in the drought tolerance, we examined pigments, gas exchange, osmolytes, and reactive oxygen radical metabolism in soybean plants. Drought declined photosynthetic pigments and caused irreversible reduction in net photosynthesis, which was followed by stomatal limitation for 5 and 10 d and nonstomatal limitation for 15 d. Soluble sugar, soluble protein…	PHOTOSYNTHETICA	2019	10.32615/ps.2019.100	Cao, L.	Zhang, Y. X.	3	0	1	1	0	0	0	0	0	0	0	0	0	0	0	0	0	0	0	0	0	0	0	1	0	0	1	1	1	0	0	1	0	0	0	0	0	0	0	0	0	0
Foliar Accumulation of Melatonin Applied to the Roots of Maize (Zea mays) Seedlings	Yoon, Young Ha; Kim, Minjae; Park, Woong June	Plants absorb melatonin from the environments as well as they synthesize the regulatory molecule. We applied melatonin to the roots of maize (Zea mays) seedlings and examined its accumulation in the leaves. Melatonin accumulation in the leaves was proportional to the exogenously applied concentrations up to 5 mM, without saturation. Time-course analysis of the accumulated melatonin content did no…	BIOMOLECULES	2019	10.3390/biom9010026	Yoon, Young Ha	Park, Woong June	3	0	1	1	0	0	0	0	0	0	0	0	0	0	0	0	0	0	0	0	0	0	0	0	0	0	0	0	0	0	0	0	0	0	0	0	0	0	0	1	0	1
Exogenous Melatonin Mitigates Methyl Viologen-Triggered Oxidative Stress in Poplar Leaf	Ding, Fei; Wang, Gang; Zhang, Shuoxin	As a ubiquitous molecule, melatonin plays a crucial role in tolerance to multiple stresses in plants. In the present work, we report the role of exogenous melatonin in relieving oxidative stress induced by methyl viologen (MV) in poplar (Populus alba x Populus glandulosa) leaf. Leaf discs pretreated with melatonin exhibited increased tolerance to MV-mediated oxidative stress. It was observed that…	MOLECULES	2018	10.3390/molecules23112852	Ding, Fei	Zhang, Shuoxin	3	0	1	1	1	0	0	0	0	0	0	0	0	0	0	0	0	0	0	0	0	0	0	0	0	0	0	0	1	0	0	0	0	0	0	0	0	0	0	0	0	0
Exogenous Melatonin Protects Canola Plants from Toxicity of Excessive Copper	Kholodova, V. P.; Vasil'ev, S. V.; Efimova, M. V.; Voronin, P. Yu.; Rakhmankulova, Z. F.; Danilova, E. Yu.; Kuznetsov, Vl. V.	Physiological mechanisms of canola (Brassica napus L., cv. Westar) plant protection afforded by melatonin (at 0.1-100 M) from copper salts (at 10-100 M) were studied. Plants were cultivated on Hoagland-Snyder medium. At the age of 5 weeks, they were subjected to melatonin, copper sulfate, or their combination for 7 days. It was found that excessive copper in a nutrient medium inhibited the dry bi…	RUSSIAN JOURNAL OF PLANT PHYSIOLOGY	2018	10.1134/S1021443718060080	Kholodova, V. P.	Kuznetsov, Vl. V.	7	0	0	0	1	0	0	0	0	0	0	0	0	0	0	0	0	0	0	0	0	0	0	0	0	0	0	0	0	0	0	0	0	0	1	1	0	0	0	0	0	0
Infection with phytopathogenic bacterium inhibits melatonin biosynthesis, decreases longevity of its vector, and suppresses the free radical-defense	Nehela, Yasser; Killiny, Nabil	Vector-borne phytopathogenic bacteria may alter the reproductive fitness, survival, behavior, and metabolism of their vectors. Candidatus Liberibacter asiaticus (CLas) is associated with the Huanglongbing (also known as citrus greening disease), one of the most destructive citrus diseases worldwide, and transmitted by Asian citrus psyllid, Diaphorina citri (Insecta, Hemiptera, Liviidae). The geno…	JOURNAL OF PINEAL RESEARCH	2018	10.1111/jpi.12511	Nehela, Yasser	Killiny, Nabil	2	0	0	0	0	0	0	0	0	0	0	0	0	0	0	0	0	0	0	0	0	0	0	1	0	0	0	0	0	0	0	0	0	0	0	0	0	0	0	0	0	0
Zinc finger of Arabidopsis thaliana 6 is involved in melatonin-mediated auxin signaling through interacting INDETERMINATE DOMAIN15 and INDOLE-3-ACETIC ACID 17	Shi, Haitao; Zhang, Shengmin; Lin, Daozhe; Wei, Yunxie; Yan, Yu; Liu, Guoyin; Reiter, Russel J.; Chan, Zhulong	Although accumulating evidence demonstrates the cross talk between melatonin and auxin as derivatives of tryptophan, the underlying signaling events remain unclear. In this study, we found that melatonin and auxin mediated the transcriptional levels of zinc finger of Arabidopsis thaliana (ZAT6) in a mutually antagonistic manner. ZAT6 negatively modulated the endogenous auxin level, and ZAT6 knock…	JOURNAL OF PINEAL RESEARCH	2018	10.1111/jpi.12494	Shi, Haitao	Chan, Zhulong	8	0	0	0	0	0	0	0	0	0	0	0	0	0	0	0	0	0	0	0	0	0	0	0	0	0	0	0	0	0	0	0	0	0	0	0	0	0	0	0	0	0
The Tryptophan Decarboxylase in Solanum lycopersicum	Pang, Xin; Wei, Yanping; Cheng, Yuan; Pan, Luzhao; Ye, Qingjing; Wang, Rongqing; Ruan, Meiying; Zhou, Guozhi; Yao, Zhuping; Li, Zhimiao; Yang, Yuejian; Liu, Weicheng; Wan, Hongjian	Melatonin plays an important role in plant growth, development, and environmental stress. In this study, a systematic analysis of tomato tryptophan decarboxylase (SlTrpDC), which is the first enzyme of melatonin biosynthesis, was conducted by integrating structural features, phylogenetic relationships, an exon/intron feature, and a divergent expression profile. The results determined that the tom…	MOLECULES	2018	10.3390/molecules23050998	Pang, Xin	Wan, Hongjian	13	0	1	1	0	0	0	0	0	0	0	0	0	0	0	0	0	0	0	0	0	0	0	0	0	0	0	0	0	0	0	0	0	0	0	0	0	0	0	0	0	0
Differential Responses of Amino Acids and Soluble Proteins to Heat Stress Associated with Genetic Variations in Heat Tolerance for Hard Fescue	Wang, Jinyu; Yuan, Bo; Xu, Yi; Huang, Bingru	Amino acid and protein metabolism are interrelated and both play important roles in plant adaptation to heat stress. The objective of this study was to identify amino acids and soluble proteins associated with genetic variation in heat tolerance of hard fescue (Festuca trachyphylla). According to a previous screening experiment, the hard fescue cultivars Reliant IV and Predator were selected as h…	JOURNAL OF THE AMERICAN SOCIETY FOR HORTICULTURAL SCIENCE	2018	10.21273/JASHS04246-17	Wang, Jinyu	Huang, Bingru	4	0	0	0	0	0	0	0	0	0	0	0	0	0	0	0	0	0	0	0	0	0	0	1	0	0	0	0	0	0	0	0	0	0	0	0	0	0	0	0	0	0
Development of enhanced hypericin yielding transgenic plants and somaclones: High throughput direct organogenesis from leaf and callus explants of Hypericum perforatum	Khan, Shamshad A.; Verma, Priyanka; Arbat, Akshata; Gaikwad, Sushma; Parasharami, Varsha A.	Hypericum perforatum is well known for its anti-depressent properties due to the presence of hypericins and hyperforins. The direct regeneration protocol from leaf explants and Agrobacterium tumefaciens mediated genetic transformation is a prerequisite for gene transfer studies in this valuable plant system as H. perforatum has shown its recalcitrance to these studies previously. The aim of gener…	INDUSTRIAL CROPS AND PRODUCTS	2018	10.1016/j.indcrop.2017.11.032	Khan, Shamshad A.	Parasharami, Varsha A.	5	0	0	0	0	0	1	0	0	0	0	0	0	0	0	0	0	0	0	0	0	0	0	0	0	0	0	0	0	0	0	0	0	0	0	0	0	0	0	0	0	0
Genomic Analysis of the ASMT Gene Family in Solanum lycopersicum	Liu, Weicheng; Zhao, Dake; Zheng, Chunfang; Chen, Chen; Peng, Xin; Cheng, Yuan; Wan, Hongjian	Acetylserotonin methyltransferase (ASMT) is the last enzyme of melatonin biosynthesis and may play a rate-limiting role in the melatonin production of plants. In this study, systematic analysis of the ASMT gene family in tomato (Solanum lycopersicum Mill) has been presented by the integration of the structural features, phylogenetic relationships, exon/intron configuration, and expression profile…	MOLECULES	2017	10.3390/molecules22111984	Liu, Weicheng	Wan, Hongjian	7	0	1	1	0	0	0	0	0	0	0	0	0	0	0	0	0	0	0	0	0	0	0	0	0	0	0	0	0	0	0	0	0	0	0	0	0	0	0	0	0	0
Melatonin-enhanced biosynthesis of antimicrobial AgNPs by improving the phytochemical reducing potential of a callus culture of Ocimum basilicum L. var. thyrsiflora	Sumaira; Khan, Tariq; Abbasi, Bilal Haider; Afridi, Muhammad Siddique; Tanveer, Faouzia; Ullah, Ikram; Bashir, Samina; Hano, Christophe	Herein, we describe the green synthesis of silver nanoparticles (AgNPs) using Ocimum basilicum L. var. thyrsiflora leaf derived callus extracts formed in response to 9.0 mu M of thidiazuron (TDZ) alone and a combination of 9.0 mu M of TDZ + 15 mu M of melatonin (Mel) which act both as reducing and stabilizing agents. Based on the phytochemical analysis, the highest total phenolic and flavonoid co…	RSC ADVANCES	2017	10.1039/c7ra05044e	Sumaira	Hano, Christophe	8	0	0	0	0	0	0	0	0	0	0	0	0	0	0	0	0	0	0	0	0	0	0	0	0	0	0	0	0	0	0	0	0	0	0	0	0	0	0	0	0	0
Investigation of uterotonic properties of Ananas comosus extracts	Monji, Faezeh; Adaikan, P. Ganesan; Lau, Lang Chu; Bin Said, Baharudin; Gong, Yinhan; Tan, Huey Min; Choolani, Mahesh	Ethnopharmacological relevance: In folklore medicine Ananas comosus (pineapple) is reputed to act as an abortifacient and in expectant women as a means of inducing labor. Several reports have claimed abortifacient property of A. comosus fruit (ripe or unripe). Ripe fruit has been used orally as traditional medicine in inducing abortion in Kerala state of India while the juice of unripe fruit was …	JOURNAL OF ETHNOPHARMACOLOGY	2016	10.1016/j.jep.2016.07.041	Monji, Faezeh	Choolani, Mahesh	7	0	0	1	0	0	0	0	0	0	0	0	0	0	0	0	0	0	0	0	0	0	0	0	0	0	0	0	0	0	0	0	0	0	0	0	0	0	0	0	0	0
Comparative Transcriptomic Analyses of Differentially Expressed Genes in Transgenic Melatonin Biosynthesis Ovine HIOMT Gene in Switchgrass	Yuan, Shan; Guan, Cong; Liu, Sijia; Huang, Yanhua; Tan, Danyang; Cui, Xin; Zhang, Yunwei; Yang, Fuyu	Melatonin serves pleiotropic functions in prompting plant growth and resistance to various stresses. The accurate biosynthetic pathway of melatonin remains elusive in plant species, while the N-acetyltransferase and O-methyltransferase were considered to be the last two key enzymes during its biosynthesis. To investigate the biosynthesis and metabolic pathway of melatonin in plants, the RNA-seq p…	FRONTIERS IN PLANT SCIENCE	2016	10.3389/fpls.2016.01613	Yuan, Shan	Yang, Fuyu	8	0	1	1	0	0	1	0	0	0	0	0	0	0	0	0	0	0	0	0	0	0	0	1	0	0	0	0	0	0	0	0	0	0	0	0	0	0	0	0	0	0
Serotonin, melatonin, and certain indole derivatives profiles in rutabaga and kohlrabi seeds, sprouts, bulbs, and roots	Pasko, Pawel; Sulkowska-Ziaja, Katarzyna; Muszynska, Bozena; Zagrodzki, Pawel	Rutabaga and kohlrabi provide valuable and beneficial constituents of human diet. Compounds such as tryptamine, melatonin, indole and methyltryptamine were determined in kohlrabi bulbs in the respective amounts of 1.38 +/- 0.31, 0.78 +/- 0.09, 0.32 +/- F 0.03 and 0.67 +/- 0.09 mu g/100 g fw. Rutabaga roots contained L-tlyptophan, tryptamine, melatonin, serotonin and methyltryptamine in the amount…	LWT-FOOD SCIENCE AND TECHNOLOGY	2014	10.1016/j.lwt.2014.07.024	Pasko, Pawel	Zagrodzki, Pawel	4	0	0	1	0	0	0	0	0	0	0	0	0	0	0	0	0	0	0	0	0	0	0	0	0	0	0	0	0	0	0	0	0	0	0	0	0	0	0	0	0	0
Stomata and Xylem Vessels Traits Improved by Melatonin Application Contribute to Enhancing Salt Tolerance and Fatty Acid Composition of Brassica napus L. Plants	Mohamed, Ibrahim A. A.; Shalby, Nesma; M. A. El-Badri, Ali; Saleem, Muhammad Hamzah; Khan, Mohammad Nauman; A. Nawaz, Muhammad; Qin, Meng; Agami, Ramadan A.; Kuai, Jie; Wang, Bo; Zhou, Guangsheng	Salinity stress is a limiting factor for the growth and yield quality of rapeseed. The potentiality of melatonin (MT; 0, 25, 50, and 100 mu M) application as a seed priming agent in mediating K+/Na(+)homeostasis and preventing the salinity stress mediated oxidative damage and photosynthetic inhibition was studied in two rapeseed cultivars. We found that 50 mu M MT treatment imparted a very promin…	AGRONOMY-BASEL	2020	10.3390/agronomy10081186	Mohamed, Ibrahim A. A.	Zhou, Guangsheng	11	0	0	0	0	0	0	0	0	0	0	0	0	0	0	0	0	0	0	0	0	0	0	1	0	0	1	0	1	0	0	0	0	0	1	0	0	0	0	0	0	0
Melatonin Suppressed the Heat Stress-Induced Damage in Wheat Seedlings by Modulating the Antioxidant Machinery	Buttar, Zeeshan Ali; Wu, Sheng Nan; Arnao, Marino B.; Wang, Chaojie; Ullah, Ikram; Wang, Chengshe	Melatonin (N-acetyl-5-methoxytryptamine) is a pleiotropic signaling molecule that plays a crucial role in the regulation of various environmental stresses, including heat stress (HS). In this study, a 100 mu M melatonin (MT) pretreatment followed by exposure to heat stress for different time periods was found to efficiently reduce oxidative stress by preventing the over-accumulation of hydrogen p…	PLANTS-BASEL	2020	10.3390/plants9070809	Buttar, Zeeshan Ali	Wang, Chengshe	6	0	0	0	0	0	0	0	0	0	0	0	0	0	0	0	0	0	0	0	0	0	0	0	1	0	1	1	1	0	0	0	0	0	1	0	0	0	0	0	0	0
Role of Melatonin in Arbuscular Mycorrhizal Fungi-Induced Resistance to Fusarium Wilt in Cucumber	Ahammed, Golam Jalal; Mao, Qi; Yan, Yaru; Wu, Meijuan; Wang, Yaqi; Ren, Jingjing; Guo, Pan; Liu, Airong; Chen, Shuangchen	Melatonin is a multifunctional molecule that confers tolerance to a number of biotic and abiotic stresses in plants. However, the role of melatonin in plant response to Fusarium oxysporum and the interaction with arbuscular mycorrhizal fungi (AMF) remain unclear. Here we show that exogenous melatonin application promoted the AMF colonization rate in cucumber roots, which potentially suppressed Fu…	PHYTOPATHOLOGY	2020	10.1094/PHYTO-11-19-0435-R	Ahammed, Golam Jalal	Chen, Shuangchen	9	0	0	0	0	0	0	0	0	0	0	0	0	0	0	0	0	0	0	0	0	0	0	0	0	0	1	1	1	0	0	0	0	0	0	0	0	0	0	0	0	0
Delay of ripening and softening in 'Guifei' mango fruit by postharvest application of melatonin	Liu, Shuaimin; Huang, Hua; Huber, Donald J.; Pan, Yonggui; Shi, Xuequn; Zhang, Zhengke	Melatonin (MT) functions as an important bio-active molecule in diverse physiological processes in higher plants. In the present study the role of MT in modulating ripening and softening in relation to ethylene and abscisic acid (ABA) biosyntheses in stored mango fruit was evaluated. The results showed that application of MT (0.5 mM, immersion for 1 h) to 'Guifei'-mangoes effectively delayed the …	POSTHARVEST BIOLOGY AND TECHNOLOGY	2020	10.1016/j.postharvbio.2020.111136	Liu, Shuaimin	Zhang, Zhengke	6	0	0	0	0	0	0	0	0	0	0	0	0	0	0	0	0	0	0	0	0	0	0	0	0	0	0	0	0	0	0	0	0	0	0	1	0	0	0	1	0	0
Melatonin foliar sprays elicit salinity stress tolerance and enhance fruit yield and quality in strawberry (Fragaria x ananassa Duch.)	Zahedi, Seyed Morteza; Hosseini, Marjan Sadat; Abadia, Javier; Marjani, Mina	The increasing salinity in soils and irrigation water is a major concern for growers of strawberry, a salt-sensitive horticultural crop. The hormone melatonin (N-acetyl-5-methoxytryptamine) is involved in many biological processes and affects plant responses to environmental stresses. The effects of weekly 100 and 200 mu M melatonin sprays on leaf composition parameters (photosynthetic pigment an…	PLANT PHYSIOLOGY AND BIOCHEMISTRY	2020	10.1016/j.plaphy.2020.02.021	Zahedi, Seyed Morteza	Marjani, Mina	4	0	0	0	0	0	0	0	0	0	0	0	0	0	0	0	0	0	0	0	0	0	0	0	0	0	0	0	0	0	0	0	0	0	0	0	0	0	0	1	0	0
Overexpression of soybean DREB1 enhances drought stress tolerance of transgenic wheat in the field	Zhou, Yongbin; Chen, Ming; Guo, Jinkao; Wang, Yanxia; Min, Donghong; Jiang, Qiyan; Ji, Hutai; Huang, Chengyan; Wei, Wei; Xu, Huijun; Chen, Xiao; Li, Liancheng; Xu, Zhaoshi; Cheng, Xianguo; Wang, Chunxiao; Wang, Chengshe; Ma, Youzhi	Drought-response-element binding (DREB)-like transcription factors can significantly enhance plant tolerance to water stress. However, most research on DREB-like proteins to date has been conducted in growth chambers or greenhouses, so there is very little evidence available to support their practical use in the field. In this study, we overexpressed GmDREB1 from soybean in two popular wheat vari…	JOURNAL OF EXPERIMENTAL BOTANY	2020	10.1093/jxb/erz569	Zhou, Yongbin	Ma, Youzhi	17	0	0	0	0	0	1	0	0	0	0	0	0	0	0	0	0	0	0	0	0	0	0	0	0	0	0	0	0	0	0	0	0	0	0	0	0	0	0	0	0	0
Interactive Effect of Melatonin and UV-C on Phenylpropanoid Metabolite Production and Antioxidant Potential in Callus Cultures of Purple Basil (Ocimum basilicum L. var purpurascens)	Nazir, Munazza; Ullah, Muhammad Asad; Mumtaz, Sadia; Siddiquah, Aisha; Shah, Muzamil; Drouet, Samantha; Hano, Christophe; Abbasi, Bilal Haider	The present study evaluated the interactive effect of melatonin and UV-C on phenylpropanoid metabolites profile and antioxidant potential of Ocimum basilicum L. Callus was treated with varying concentrations of melatonin and UV-C radiations for different time durations, either alone and/or in combination. Individual treatments of both UV-C and melatonin proved to be more effective than combine tr…	MOLECULES	2020	10.3390/molecules25051072	Nazir, Munazza	Abbasi, Bilal Haider	8	0	0	0	0	0	0	0	0	0	0	0	0	0	0	0	0	0	0	0	0	0	0	0	1	0	0	0	0	0	0	0	0	1	0	0	0	1	0	0	0	0
Nano-ZnO-Induced Drought Tolerance Is Associated with Melatonin Synthesis and Metabolism in Maize	Sun, Luying; Song, Fengbin; Guo, Junhong; Zhu, Xiancan; Liu, Shengqun; Liu, Fulai; Li, Xiangnan	The applications of ZnO nanoparticles in agriculture have largely contributed to crop growth regulation, quality enhancement, and induction of stress tolerance, while the underlying mechanisms remain elusive. Herein, the involvement of melatonin synthesis and metabolism in the process of nano-ZnO induced drought tolerance was investigated in maize. Drought stress resulted in the changes of subcel…	INTERNATIONAL JOURNAL OF MOLECULAR SCIENCES	2020	10.3390/ijms21030782	Sun, Luying	Li, Xiangnan	7	0	0	0	0	0	0	0	0	0	0	0	0	0	0	0	0	0	0	0	0	0	0	1	0	0	0	1	0	0	0	0	0	0	0	0	0	0	0	0	0	0
Melatonin Alleviates Drought Stress by a Non-Enzymatic and Enzymatic Antioxidative System in Kiwifruit Seedlings	Xia, Hui; Ni, Zhiyou; Hu, Rongping; Lin, Lijin; Deng, Honghong; Wang, Jin; Tang, Yi; Sun, Guochao; Wang, Xun; Li, Huanxiu; Liao, Mingan; Lv, Xiulan; Liang, Dong	Although melatonin was affirmed to alleviate drought stress in various plant species, the mechanism in kiwifruit remains to be elucidated. In this study, the transcriptomes of kiwifruit leaves under control (CK), DR (drought stress), and MTDR (drought plus melatonin) treatments were evaluated. After comparisons of the gene expression between DR and MTDR, the differentially expressed genes (DEGs) …	INTERNATIONAL JOURNAL OF MOLECULAR SCIENCES	2020	10.3390/ijms21030852	Xia, Hui	Liang, Dong	13	0	0	0	0	0	0	0	0	0	0	0	0	0	0	0	0	0	0	0	0	0	0	1	0	0	0	0	1	0	0	0	0	0	0	1	0	0	0	0	0	0
Melatonin Positively Influences the Photosynthetic Machinery and Antioxidant System of Avena sativa during Salinity Stress	Varghese, Nisha; Alyammahi, Onoud; Nasreddine, Sarah; Alhassani, Abla; Gururani, Mayank Anand	Recent studies have demonstrated melatonin protects various crops against abiotic stresses. However, the effects of melatonin on the photosynthetic apparatus of stressed plants is poorly characterized. We investigated the effects of melatonin pretreatment on photosynthesis and tolerance to salinity stress in Avena sativa (oat) plants. Oat plants were exposed to four treatments (three replicate po…	PLANTS-BASEL	2019	10.3390/plants8120610	Varghese, Nisha	Gururani, Mayank Anand	5	0	0	0	0	0	0	0	0	0	0	0	0	0	0	0	0	0	0	0	0	0	0	0	1	0	0	0	0	0	0	0	0	0	1	0	0	0	0	0	0	0
Melatonin Stimulates Activities and Expression Level of Antioxidant Enzymes and Preserves Functionality of Photosynthetic Apparatus in Hickory Plants (Carya cathayensis Sarg.) under PEG-Promoted Drought	Wang, Junfeng; Chen, Juanjuan; Sharma, Anket; Tao, Shenchen; Zheng, Bingsong; Landi, Marco; Yuan, Huwei; Yan, Daoliang	Nowadays, drought is one of the major abiotic factors which negatively affects growth and development of several fruit tree species, including Chinese hickory plants (Carya cathayensis Sarg.). The present investigation was conducted to study the possible positive effects of melatonin in drought resistance of C. cathayensis plants along with associated mechanisms. It was observed that melatonin pr…	AGRONOMY-BASEL	2019	10.3390/agronomy9110702	Wang, Junfeng	Yan, Daoliang	8	0	0	0	0	0	0	0	0	0	0	0	0	0	0	0	0	0	0	0	0	0	0	0	1	0	0	1	1	0	0	0	0	0	0	0	0	0	0	0	0	0
Melatonin facilitates lateral root development by coordinating PAO-derived hydrogen peroxide and Rboh-derived superoxide radical	Chen, Jian; Li, Hui; Yang, Kang; Wang, Yongzhu; Yang, Lifei; Hu, Liangbin; Liu, Ruixian; Shi, Zhiqi	Melatonin, a phytochemical, can regulate lateral root (LR) formation, but the downstream signaling of melatonin remains elusive. Here we investigated the roles of hydrogen peroxide (H2O2) and superoxide radical (O-2(center dot-)) in melatonin-promoted LR formation in tomato (Solanum lycopersicum) roots by using physiological, histochemical, bioinformatic, and biochemical approaches. The increase …	FREE RADICAL BIOLOGY AND MEDICINE	2019	10.1016/j.freeradbiomed.2019.09.011	Chen, Jian	Shi, Zhiqi	8	0	0	0	0	0	0	0	0	0	0	0	0	0	0	0	0	0	0	0	0	0	0	0	0	0	1	0	1	0	0	0	0	0	0	0	0	0	0	0	0	0
Improving drought stress tolerance in fenugreek (Trigonella foenum-graecum) by exogenous melatonin	Zamani, Zohreh; Amiri, Hamzeh; Ismaili, Ahmad	The present study was conducted to determine the changes which occurred in the water-stressed fenugreek (Trigonella foenum-gracum L.) in response to melatonin treatment. Fenugreek is a valuable medicinal plant which contains trigonelline that plays an osmoregulatory role in abiotic stress. To this end, the effects of three levels of water deficit in the first experiment and four concentrations of…	PLANT BIOSYSTEMS	2020	10.1080/11263504.2019.1674398	Zamani, Zohreh	Ismaili, Ahmad	3	0	0	0	1	0	0	0	0	0	0	0	0	0	0	0	0	0	0	0	0	0	0	0	0	0	1	1	0	0	0	0	0	0	1	0	0	0	0	0	0	0
Investigating the effect of methyl jasmonate and melatonin on resistance of Malus crabapple 'Hong Jiu' to ozone stress	Qiu, Yanfen; An, Kai; Sun, Jingjing; Chen, Xuesen; Gong, Xiaojun; Ma, Li; Wu, Shuqing; Jiang, Shenghui; Zhang, Zongying; Wang, Yanling	Ozone (O-3) is an adverse environmental factor posing damage to ornamental plants. Thus, it is important to seek an effective way of enhancing plant tolerance to O-3-induced damage. Methyl jasmonate (MJ) and melatonin (MT) are plant growth regulators (PGRs) involved in plant abiotic stress responses. In this study, compared with the control group of plants without ozone, the influence of exogenou…	ENVIRONMENTAL SCIENCE AND POLLUTION RESEARCH	2019	10.1007/s11356-019-05946-w	Qiu, Yanfen	Wang, Yanling	10	0	0	0	0	0	0	0	0	0	0	0	0	0	0	0	0	0	0	0	0	0	0	0	0	0	0	1	0	0	0	0	0	0	0	0	0	0	0	0	0	0
Transgenic Arabidopsis overexpressing MsSNAT enhances salt tolerance via the increase in autophagy, and the reestablishment of redox and ion homeostasis	Zhao, Gan; Yu, Xiuli; Lou, Wang; Wei, Siqi; Wang, Ren; Wan, Qun; Shen, Wenbiao	Whether or how alfalfa serotonin N-acetyltransferase gene (MsSNAT; a melatonin synthetic gene) enhances salinity tolerance is still elusive. In this report, the wild-type and the transgenic Arabidopsis plants overexpressing MsSNAT were adopted. Compared to the wild-type, two transgenic Arabidopsis lines enhanced endogenous melatonin production in response to NaCl stress. Meanwhile, the primary ro…	ENVIRONMENTAL AND EXPERIMENTAL BOTANY	2019	10.1016/j.envexpbot.2019.04.017	Zhao, Gan	Shen, Wenbiao	7	0	0	0	0	0	1	0	0	0	0	0	0	0	0	0	0	0	0	0	0	0	0	0	0	0	0	0	0	0	0	0	0	0	1	0	0	0	0	0	0	0
Effects of melatonin on photosynthesis and soybean seed growth during grain filling under drought stress	Zou, J. N.; Jin, X. J.; Zhang, Y. X.; Ren, C. Y.; Zhang, M. C.; Wang, M. X.	We studied the effects of melatonin on soybean photosynthesis and seed growth at different developmental stages under drought stress induced by polyethylene glycol in the growth medium. Experimental groups were supplied with a normal nutrient solution after seven days of continuous treatment; overall, five treatments were completed when the early maturity stage was reached. Under normal water sup…	PHOTOSYNTHETICA	2019	10.32615/ps.2019.066	Zou, J. N.	Wang, M. X.	6	0	0	0	0	0	0	0	0	0	0	0	0	0	0	0	0	0	0	0	0	0	0	0	0	0	0	0	0	0	0	1	0	0	1	0	0	0	0	0	0	0
Antioxidative response of Melissa officinalis L. and Valeriana officinalis L. leaves exposed to exogenous melatonin and excessive zinc and cadmium levels	Hodzic, Elvisa; Balaban, Milica; Suskalo, Nevena; Galijasevic, Semira; Hasanagic, Dino; Kukavica, Biljana	Heavy metals disturb the redox homeostasis of the plant cell. The indolamine hormone, melatonin, protects plants from oxidative damage by directly scavenging reactive oxygen species or by stimulating the activity of antioxidant enzymes. The antioxidative role of melatonin in the leaves of two medicinal plants, lemon balm (Melissa officinalis L.) and valerian (Valeriana officinalis L.) that were t…	JOURNAL OF THE SERBIAN CHEMICAL SOCIETY	2019	10.2298/JSC180504070H	Hodzic, Elvisa	Kukavica, Biljana	6	0	1	0	1	0	0	0	0	0	0	0	0	0	0	0	0	0	0	0	0	0	0	0	0	0	0	0	1	0	0	0	0	0	0	0	0	0	0	0	0	0
Plasticity in the hormonal response to cold stress in the invasive plant Carpobrotus edulis	Fenollosa, Erola; Gamez, Anna; Munne-Bosch, Sergi	Cold stress response is mediated by multiple signaling pathways with complex interactions, among which phytohormones may play a role. We explored changes in the contents of phytohormones, including abscisic acid, jasmonic acid, salicylic acid, auxin, cytokinins, gibberellins and melatonin, along with stress tolerance markers in an invasive halophyte, Carpobrotus edulis in response to chilling. In…	JOURNAL OF PLANT PHYSIOLOGY	2018	10.1016/j.jplph.2018.09.009	Fenollosa, Erola	Munne-Bosch, Sergi	3	0	0	0	0	0	0	0	0	0	0	0	0	0	0	0	0	0	0	0	0	0	0	0	0	0	0	0	0	0	0	0	0	0	0	0	0	0	0	1	0	1
Inhibition of NADPH oxidase increases defense enzyme activities and improves maize seed germination under Pb stress	Zhang, Yifei; Deng, Benliang; Li, Zuotong	Contaminated soil accumulated high levels of Pb, which shows great risk to human health and crop growth. To alleviate Pb impaired seed germination and seedling growth, effects of three methods were compared. Here, effects of the heavy metal chelator EDTA, reactive oxygen species (ROS) scavenger (e.g. dimethylthiourea/DMTU, glutathione and melatonin), and specific inhibitors of NADPH oxidase or NO…	ECOTOXICOLOGY AND ENVIRONMENTAL SAFETY	2018	10.1016/j.ecoenv.2018.04.028	Zhang, Yifei	Li, Zuotong	3	0	0	0	0	0	0	0	0	0	0	0	0	0	0	0	0	0	0	0	0	0	0	0	0	0	1	0	0	0	0	0	0	0	0	0	0	0	0	0	0	0
Physiology and transcriptome analyses reveal a protective effect of the radical scavenger melatonin in aging maize seeds	Su, Xiaoyu; Xin, Longfei; Li, Zhuo; Zheng, Huifang; Mao, Jun; Yang, Qinghua	To determine the role of melatonin in aging maize seeds (Zea mays L.), we investigated the physiological characteristics and performance analysis of the transcriptome after applying melatonin to maize seeds as a response to aging. In this study, we demonstrated that applying exogenous melatonin alleviated aging-induced oxidative damage, improved the activity of aging seeds, promoted growth of the…	FREE RADICAL RESEARCH	2018	10.1080/10715762.2018.1472378	Su, Xiaoyu	Yang, Qinghua	6	0	0	0	0	0	0	0	0	0	0	0	0	0	0	0	0	0	0	0	0	0	0	1	0	0	0	0	0	0	0	0	0	0	0	0	0	0	0	0	0	0
Low-Energy Electron Interaction with Melatonin and Related Compounds	Pshenichnyuk, Stanislav A.; Modelli, Alberto; Jones, Derek; Lazneva, Eleonora F.; Komolov, Alexei S.	The electron attaching properties and fragmentation of temporary negative ions of melatonin and its biosynthetic precursor tryptophan are studied in vacuo using dissociative electron attachment (DEA) spectroscopy. The experimental findings are interpreted in silico with the support of Hartree-Fock and density functional theory calculations of empty orbital energies and symmetries, and evaluation …	JOURNAL OF PHYSICAL CHEMISTRY B	2017	10.1021/acs.jpcb.7b01408	Pshenichnyuk, Stanislav A.	Komolov, Alexei S.	5	0	1	1	0	0	0	0	0	0	0	0	0	0	0	0	0	0	0	0	0	0	0	0	0	0	0	0	0	0	0	0	0	0	0	0	0	0	0	0	0	0
Physiological response of plants to polyethylene glycol (PEG-6000) by exogenous melatonin application in wheat	Li, Dongxiao; Zhang, Di; Wang, Hongguang; Li, Yanming; Li, Ruiqi	The regulation effect of melatonin on water use efficiency of leaf and potential mechanisms related to phytohormone of leaf/root were investigated using two wheat (Triticum aestivum L.) cultivars with contrasting drought tolerance: drought-tolerant 'Hengguan35' (HG35) and growing in irrigated fields 'Jimai22' (JM22). Four treatments, including normal water treatment (N), 20% polyethylene glycol (…	ZEMDIRBYSTE-AGRICULTURE	2017	10.13080/z-a.2017.104.028	Li, Dongxiao	Li, Ruiqi	5	0	0	0	1	0	0	0	0	0	0	0	0	0	0	0	0	0	0	0	0	0	0	0	0	0	1	0	0	0	0	0	0	0	1	0	0	0	0	1	0	0
In vitro conservation, phytochemistry, and medicinal activity of Artemisia tridentata Nutt.: metabolomics as a hypothesis-generating tool for plant tissue culture	Turi, Christina E.; Axwik, Katarina E.; Murch, Susan J.	Artemisia tridentata Nutt. and related species in the subgenus Tridentatae are ecologically important plants with a rich history of ceremonial and medicinal use by the indigenous people of North America. With the exception of antimicrobial and insecticidal bioassays, there is limited data to support the traditional uses of A. tridentata. Additionally, wild A. tridentata populations are declining …	PLANT GROWTH REGULATION	2014	10.1007/s10725-014-9915-y	Turi, Christina E.	Murch, Susan J.	3	1	0	0	0	0	0	0	0	0	0	0	0	0	0	0	0	0	0	0	0	0	0	0	0	0	0	0	0	0	0	0	0	0	0	0	0	0	0	0	0	0
[truncated: 186 more rows]
[truncated: 150 more columns]
