# Supplementary material for: A Systematic Review of Melatonin in Plants: An Example of Evolution of Literature
Source: Front Plant Sci. 2021 Jun 18;12:683047. doi: 10.3389/fpls.2021.683047 (PMC8270005; doi:10.3389/fpls.2021.683047)
Supplement: Supplementary Data 2 — Complete bibliography of review articles included in this study and query terms. [file Table_2.XLSX]

## Sheet: Sheet2
Row Labels	Count of Year
1996	1
1997	1
2001	2
2002	1
2003	1
2005	1
2006	1
2008	1
2009	3
2010	2
2011	3
2012	2
2013	3
2014	2
2015	9
2016	6
2017	5
2018	12
2019	17
2020	22
2021	1
Grand Total	96		count			percent
			original	review	Total	original	review
		1969	1		1	100	0
		1973	1		1	100	0
		1994	1		1	100	0
		1995	3		3	100	0
		1996	1	1	2	50	50
		1997	2	1	3	66.6667	33.3333
		2000	3		3	100	0
		2001	5	2	7	71.4286	28.5714
		2002	3	1	4	75	25
		2003	6	1	7	85.7143	14.2857
		2004	2		2	100	0
		2005	3	1	4	75	25
		2006	11	1	12	91.6667	8.33333
		2007	6		6	100	0
		2008	5	1	6	83.3333	16.6667
		2009	13	3	16	81.25	18.75
		2010	6	2	8	75	25
		2011	13	3	16	81.25	18.75
		2012	18	2	20	90	10
		2013	25	3	28	89.2857	10.7143
		2014	33	2	35	94.2857	5.71429
		2015	47	9	56	83.9286	16.0714
		2016	55	6	61	90.1639	9.83607
		2017	65	5	70	92.8571	7.14286
		2018	90	12	102	88.2353	11.7647
		2019	123	17	140	87.8571	12.1429
		2020	150	22	172	87.2093	12.7907
		2021	3	1	4	75	25

## Sheet: Reviews
SUM									28	72	74	20	36	14	14	46	4	1	1	16	17	21	63	51	79	0	4	4	9	14	7	19	1	37	46	4	4	21	0	0	0	0	19	7	36	3	43	14	24
						Authorship			Melatonin Discovery			Topic Area By Title Search Term
Title	Authors	Abstract	Journal	Year	DOI	First Author	Last Author	Total Number Authors	1997 Murch	Dubbels 1995	Hattori 1995	senescence	signal	circadian	vertebrate	animal	clinical	nutraceutical	non-vertebrate	rhythm	photosynthesis	light	antioxidant	ROS or reactive oxygen species	stress	cold stress	low temperature	salt OR sodium OR salinity	heat OR high temperature	metal OR cadmium OR selenium OR aluminum OR arsenic OR copper OR boron OR fluoride	toxicity	drought	water stress	abiotic	biotic	organogenesis	morphogenesis	root	seed OR nut	embryo OR ovule	pollen	microspore	reproduction OR reproductive	shoot	enzyme OR characterization OR cloning	vegetative	development	germination	metabolism
Melatonin and reactive oxygen and nitrogen species: a model for the plant redox network	Arnao, M. B.; Hernandez-Ruiz, J.	Melatonin (N-acetyl-5-methoxytryptamine) was discovered in plants in 1995; since then numerous functions have been attributed to this molecule in vascular plants. In addition to its recognized role as a universal antioxidant, other relevant functions have been studied in plants such as its rhizogenic- and vegetative-growth effects, protection against leaf senescence and influences on photosynthes…	MELATONIN RESEARCH	2019	10.32794/11250036	Arnao, M. B.	Hernandez-Ruiz, J.	2	0	0	0	1	1	0	0	0	0	0	0	0	1	0	1	1	1	0	0	0	0	0	0	0	0	1	1	0	0	0	0	0	0	0	0	0	0	1	0	0	0
Phytomelatonin: An Emerging Regulator of Plant Biotic Stress Resistance	Zhao, DK; Wang, HP; Chen, SY; Yu, DQ; Reiter, RJ	Melatonin has diverse functions in plant development and stress tolerance, with recent evidence showing a beneficial role in plant biotic stress tolerance. It has been hypothesized that pathogenic invasion causes the immediate generation of melatonin, reactive oxygen species (ROS), and reactive nitrogen species (RNS), with these being mutually dependent, forming the integrative melatonin-ROS-RNS …	TRENDS IN PLANT SCIENCE	2021	10.1016/j.tplants.2020.08.009	Zhao, DK	Reiter, RJ	5	0	0	0	0	1	0	0	0	0	0	0	0	0	0	0	1	1	0	0	0	0	0	0	0	0	0	1	0	0	0	0	0	0	0	0	0	0	0	1	0	0
Melatonin as a regulatory hub of plant hormone levels and action in stress situations	Arnao, MB; Hernandez-Ruiz, J	Melatonin, a molecule first discovered in animal tissues, plays an important role in multiple physiological responses as a possible plant master regulator. It mediates responses to different types of stress, both biotic and abiotic. Melatonin reduces the negative effects associated with stressors, improving the plant response by increasing plant stress tolerance. When plants respond to stress sit…	PLANT BIOLOGY	2020	10.1111/plb.13202	Arnao, MB	Hernandez-Ruiz, J	2	0	1	1	0	1	0	0	1	0	0	0	0	0	0	0	0	1	0	0	0	0	0	0	0	0	1	1	0	0	0	0	0	0	0	0	0	0	0	0	0	1
Role of Melatonin in Plant Tolerance to Soil Stressors: Salinity, pH and Heavy Metals	Moustafa-Farag, M; Elkelish, A; Dafea, M; Khan, M; Arnao, MB; Abdelhamid, MT; Abu El-Ezz, A; Almoneafy, A; Mahmoud, A; Awad, M; Li, LF; Wang, YH; Hasanuzzaman, M; Ai, SY	Melatonin (MT) is a pleiotropic molecule with diverse and numerous actions both in plants and animals. In plants, MT acts as an excellent promotor of tolerance against abiotic stress situations such as drought, cold, heat, salinity, and chemical pollutants. In all these situations, MT has a stimulating effect on plants, fomenting many changes in biochemical processes and stress-related gene expre…	MOLECULES	2020	10.3390/molecules25225359	Moustafa-Farag, M	Ai, SY	14	0	1	1	0	0	0	0	1	0	0	0	0	0	0	1	1	1	0	0	1	1	1	0	1	0	1	1	0	0	0	0	0	0	0	0	0	1	0	0	0	1
ROS and NO Regulation by Melatonin Under Abiotic Stress in Plants	Pardo-Hernandez, M; Lopez-Delacalle, M; Rivero, RM	Abiotic stress in plants is an increasingly common problem in agriculture, and thus, studies on plant treatments with specific compounds that may help to mitigate these effects have increased in recent years. Melatonin (MET) application and its role in mitigating the negative effects of abiotic stress in plants have become important in the last few years. MET, a derivative of tryptophan, is an im…	ANTIOXIDANTS	2020	10.3390/antiox9111078	Pardo-Hernandez, M	Rivero, RM	3	0	1	1	0	1	0	0	0	0	0	0	0	0	1	1	1	1	0	1	0	0	0	0	0	0	1	1	0	0	0	0	0	0	0	1	0	0	0	1	0	0
Emerging roles of melatonin in mitigating abiotic and biotic stresses of horticultural crops	Tiwari, RK; Lal, MK; Naga, KC; Kumar, R; Chourasia, KN; Subhash, S; Kumar, D; Sharma, S	Environmental stress and pathogen infection are the major limiting factors in worldwide horticulture production, resulting in huge yield loss. Melatonin (N-acetyl-5-methoxytryptamine) has gained a great interest in plant science research owing to its multifaceted role in plant systems. Melatonin mediated efficient reactive oxygen species scavenging and activation of antioxidant defence responses …	SCIENTIA HORTICULTURAE	2020	10.1016/j.scienta.2020.109592	Tiwari, RK	Sharma, S	8	0	0	0	0	0	0	0	0	0	0	0	0	0	1	1	1	1	0	0	0	1	0	0	1	0	1	1	0	0	0	0	0	0	0	0	0	1	0	0	0	0
Crosstalk between melatonin and nitric oxide in plant development and stress responses	He, HY; He, LF	Melatonin is widely involved in plant growth and stress responses as a master regulator. Melatonin treatment alters the levels of endogenous nitric oxide (NO) and NO affects endogenous melatonin content. Melatonin and NO may induce various plant physiological behavior through interaction mechanism. However, the interactions between melatonin and NO in plants are largely unknown. The review presen…	PHYSIOLOGIA PLANTARUM	2020	10.1111/ppl.13143	He, HY	He, LF	2	0	1	1	0	0	0	0	0	0	0	0	0	0	0	0	1	1	0	0	0	0	0	0	0	0	0	0	0	0	0	0	0	0	0	0	0	0	0	1	0	1
Naturally occurring melatonin: Sources and possible ways of its biosynthesis	Juhnevica-Radenkova, K; Moreno, DA; Ikase, L; Drudze, I; Radenkovs, V	According to recent reports, the global market for melatonin is worth 700 million USD in 2018 and would reach 2,790 million USD by 2025, growing at a CAGR of 18.9% during 2019 to 2025. Having regard to the prevalence of sleep and circadian rhythm disorders and a clear tendency to increase the demand for melatonin, and the current lack of alternative green and cost-efficient technologies of its sy…	COMPREHENSIVE REVIEWS IN FOOD SCIENCE AND FOOD SAFETY	2020	10.1111/1541-4337.12639	Juhnevica-Radenkova, K	Radenkovs, V	5	1	1	1	0	0	1	0	0	0	0	0	1	0	0	0	0	0	0	0	0	0	0	0	0	0	0	1	0	0	0	0	0	0	0	0	0	0	0	0	0	0
Melatonin in business with abiotic stresses in plants	Khan, TA; Fariduddin, Q; Nazir, F; Saleem, M	Melatonin (MEL) is the potential biostimulator molecule, governing multiple range of growth and developmental processes in plants, particularly under different environmental constrains. Mainly, its role is considered as an antioxidant molecule that copes with oxidative stress through scavenging of reactive oxygen species and modulation of stress related genes. It also enhances the antioxidant enz…	PHYSIOLOGY AND MOLECULAR BIOLOGY OF PLANTS	2020	10.1007/s12298-020-00878-z	Khan, TA	Saleem, M	4	0	1	1	1	1	0	0	0	0	0	0	0	0	0	1	1	1	0	0	0	0	0	0	0	0	1	1	0	0	1	0	0	0	0	0	0	1	0	1	1	0
Melatonin-Induced Water Stress Tolerance in Plants: Recent Advances	Moustafa-Farag, M; Mahmoud, A; Arnao, MB; Sheteiwy, MS; Dafea, M; Soltan, M; Elkelish, A; Hasanuzzaman, M; Ai, SY	Water stress (drought and waterlogging) is severe abiotic stress to plant growth and development. Melatonin, a bioactive plant hormone, has been widely tested in drought situations in diverse plant species, while few studies on the role of melatonin in waterlogging stress conditions have been published. In the current review, we analyze the biostimulatory functions of melatonin on plants under bo…	ANTIOXIDANTS	2020	10.3390/antiox9090809	Moustafa-Farag, M	Ai, SY	9	0	0	0	0	0	0	0	0	0	0	0	0	0	0	0	1	1	0	0	0	0	0	0	1	1	1	1	0	0	0	0	0	0	0	0	0	0	0	1	0	0
Melatonin: A master regulator of plant development and stress responses	Sun, CL; Liu, LJ; Wang, LX; Li, BH; Jin, CW; Lin, XY	Melatonin is a pleiotropic molecule with multiple functions in plants. Since the discovery of melatonin in plants, numerous studies have provided insight into the biosynthesis, catabolism, and physiological and biochemical functions of this important molecule. Here, we describe the biosynthesis of melatonin from tryptophan, as well as its various degradation pathways in plants. The identification…	JOURNAL OF INTEGRATIVE PLANT BIOLOGY	2020	10.1111/jipb.12993	Sun, CL	Lin, XY	6	0	1	1	1	0	0	0	0	0	0	0	0	0	0	1	1	1	0	0	0	0	1	0	1	0	1	1	0	0	1	0	0	0	0	0	0	0	0	1	0	0
An evolutionary view of melatonin synthesis and metabolism related to its biological functions in plants	Tan, DX; Reiter, RJ	Plant melatonin research is a rapidly developing field. A variety of isoforms of melatonin's biosynthetic enzymes are present in different plants. Due to the different origins, they exhibit independent responses to the variable environmental stimuli. The locations for melatonin biosynthesis in plants are chloroplasts and mitochondria. These organelles have inherited their melatonin biosynthetic c…	JOURNAL OF EXPERIMENTAL BOTANY	2020	10.1093/jxb/eraa235	Tan, DX	Reiter, RJ	2	1	1	1	0	0	0	0	1	0	0	0	0	0	0	0	0	0	0	0	0	0	0	0	0	0	0	0	0	0	0	0	0	0	0	0	0	1	0	0	0	1
Electroanalytical and Spectrophotometric Methods for the Determination of Melatonin-a Review	Alessa, H; Althakafy, JT; Saber, AL	Melatonin (MT), chemically N-acetyl-5-methoxytryptamine, was initially recognized in bovine pineal tissue and hence it has been represented exclusively as a hormone. The hormone can be used as a sleep aid for the treatment of some sleep disorders. However, MT is discovered in the earliest life forms and presented plants, bacteria, insects, fungi, and vertebrates as well as humans. MT possess vari…	INTERNATIONAL JOURNAL OF ELECTROCHEMICAL SCIENCE	2020	10.20964/2020.08.04	Alessa, H	Saber, AL	3	0	0	0	0	0	0	1	0	0	0	0	0	0	0	1	0	0	0	0	0	1	0	0	0	0	0	0	0	0	0	0	0	0	0	0	0	0	0	0	0	0
Melatonin plays multifunctional role in horticultural crops against environmental stresses: A review	Bose, SK; Howlader, P	Melatonin (N-acetyl-5-methoxytryptamine) is a multifunctional nontoxic signaling molecule, universally distributed in different plant organs and accountable for invigorating numerous physiological mechanisms against various adverse environmental factors. In the current review, we revealed that the biosynthesis of melatonin occurred in plants by themselves and accumulation of melatonin vacillated …	ENVIRONMENTAL AND EXPERIMENTAL BOTANY	2020	10.1016/j.envexpbot.2020.104063	Bose, SK	Howlader, P	2	0	1	1	0	1	0	0	0	0	0	0	0	1	0	1	1	1	0	0	0	0	1	0	1	0	0	0	0	0	1	0	0	0	0	0	0	1	0	0	1	0
Melatonin in fruit production and postharvest preservation: A review	Wang, SY; Shi, XC; Wang, R; Wang, HL; Liu, FQ; Laborda, P	Melatonin (MLT) is a versatile biological signal that is involved in a number of plant processes, including germination, development, flowering, photosynthesis and defence. The need to develop new methodologies for enhancing crop yields and extending fruit postharvest preservation, together with the beneficial effects of dietary MLT, have stimulated the study of the availability and biological ro…	FOOD CHEMISTRY	2020	10.1016/j.foodchem.2020.126642	Wang, SY	Laborda, P	6	0	1	1	0	1	0	0	0	0	0	0	0	1	0	0	0	1	0	0	0	0	0	0	0	0	1	1	0	0	0	0	0	0	0	0	0	0	0	1	1	0
Occurrence and Biosynthesis of Melatonin and Its Exogenous Effect on Plants	Mir, AR; Faizan, M; Bajguz, A; Sami, F; Siddiqui, H; Hayat, S	Melatonin is an endogenous indolamine found in many plants. It has been shown to generate a wide range of metabolic, physiological, and cellular responses, thus affecting growth and development, particularly under different environmental stresses. In the present review, we focus on its role in germination, growth and development, photosynthesis, senescence, and antioxidant activity in plants. Fur…	ACTA SOCIETATIS BOTANICORUM POLONIAE	2020	10.5586/asbp.8922	Mir, AR	Hayat, S	6	1	1	1	1	1	0	0	0	0	0	0	0	1	0	1	0	1	0	0	0	0	0	0	0	0	1	1	0	0	0	0	0	0	0	0	0	0	0	1	1	0
Melatonin in flowering, fruit set and fruit ripening	Arnao, MB; Hernandez-Ruiz, J	Key message Melatonin induces a delay in flowering stabilizing DELLA proteins and also promotes the transcription of FLC. In fruit set, melatonin is able to induce parthenocarpy. Melatonin promotes ripening and retards senescence of fruits. Melatonin is an animal hormone involved in many regulatory processes such as those related to sleep. Melatonin was discovered in plants in 1995 and is called …	PLANT REPRODUCTION	2020	10.1007/s00497-020-00388-8	Arnao, MB	Hernandez-Ruiz, J	2	0	0	0	1	0	0	0	1	0	0	0	0	1	0	0	0	1	0	0	0	0	0	0	0	0	0	0	0	0	0	0	0	0	0	1	0	0	0	1	1	1
Melatonin: Awakening the Defense Mechanisms during Plant Oxidative Stress	Khan, A; Numan, M; Khan, AL; Lee, IJ; Imran, M; Asaf, S; Al-Harrasi, A	Melatonin is a multifunctional signaling molecule that is ubiquitously distributed in different parts of a plant and responsible for stimulating several physio-chemical responses to adverse environmental conditions. In this review, we show that, although plants are able to biosynthesize melatonin, the exogenous application of melatonin to various crops can improve plant growth and development in …	PLANTS-BASEL	2020	10.3390/plants9040407	Khan, A	Al-Harrasi, A	7	0	0	0	0	1	0	0	0	0	0	0	0	0	0	1	0	1	0	0	0	0	1	0	1	0	1	1	0	0	0	0	0	0	0	0	0	1	0	1	0	0
Melatonin and Its Protective Role against Biotic Stress Impacts on Plants	Moustafa-Farag, M; Almoneafy, A; Mahmoud, A; Elkelish, A; Arnao, MB; Li, LF; Ai, SY	Biotic stress causes immense damage to agricultural products worldwide and raises the risk of hunger in many areas. Plants themselves tolerate biotic stresses via several pathways, including pathogen-associated molecular patterns (PAMPs), which trigger immunity and plant resistance (R) proteins. On the other hand, humans use several non-ecofriendly methods to control biotic stresses, such as chem…	BIOMOLECULES	2020	10.3390/biom10010054	Moustafa-Farag, M	Ai, SY	7	0	1	1	0	0	0	0	1	0	0	0	0	0	1	0	0	1	0	0	0	0	0	0	0	0	1	1	0	0	0	0	0	0	0	0	1	0	0	0	0	0
Is Phytomelatonin a New Plant Hormone?	Arnao, MB; Hernandez-Ruiz, J	Melatonin (N-acetyl-5-methoxytryptamine) is of particular importance as a chronobiological hormone in mammals, acting as a signal of darkness that provides information to the brain and peripheral organs. It is an endogenous synchronizer for both endocrine (i.e., via neurotransmitter release) and other physiological rhythms. In this work we will try to add to the series of scientific events and di…	AGRONOMY-BASEL	2020	10.3390/agronomy10010095	Arnao, MB	Hernandez-Ruiz, J	2	0	1	1	0	1	0	0	1	0	0	0	1	0	0	0	0	0	0	0	0	0	0	0	0	0	0	0	0	0	0	0	0	0	0	0	0	0	0	0	0	0
Role of Melatonin to Enhance Phytoremediation Capacity	Arnao, MB; Hernandez-Ruiz, J	Phytoremediation is a green technology that aims to take up pollutants from soil or water. Metals are one of the targets of these techniques due to their high toxicity in biological systems, including plants and animals. Their elimination or, at least, decrease will help keep them from being incorporated in the trophic chain and thus reaching animal and human food. The metal removal efficiency of…	APPLIED SCIENCES-BASEL	2019	10.3390/app9245293	Arnao, MB	Hernandez-Ruiz, J	2	0	0	0	0	0	0	0	1	0	0	0	0	0	1	1	1	1	0	0	0	0	1	1	0	0	1	1	0	0	0	0	0	0	0	0	0	0	0	0	0	1
Melatonin-Nitric Oxide Crosstalk and Their Roles in the Redox Network in Plants	Zhu, Y; Gao, H; Lu, MX; Hao, CY; Pu, ZQ; Guo, MJ; Hou, DR; Chen, LY; Huang, X	Melatonin, an amine hormone highly conserved during evolution, has a wide range of physiological functions in animals and plants. It is involved in plant growth, development, maturation, and aging, and also helps ameliorate various types of abiotic and biotic stresses, including salt, drought, heavy metals, and pathogens. Melatonin-related growth and defense responses of plants are complex, and i…	INTERNATIONAL JOURNAL OF MOLECULAR SCIENCES	2019	10.3390/ijms20246200	Zhu, Y	Huang, X	9	0	0	0	0	1	0	0	1	0	0	0	0	0	0	0	1	1	0	0	0	0	1	0	1	0	1	1	0	0	1	0	0	0	0	0	0	0	0	1	0	0
Insights into nitric oxide-melatonin crosstalk and N-nitrosomelatonin functioning in plants	Mukherjee, S	Similar to animal systems, plants have been suggested to possess both positive and antagonistic interactions between nitric oxide (NO) and melatonin. This review summarizes the current understanding of NO-melatonin crosstalk in plants with regard to redox homoeostasis, regulation of gene expression, and developmental changes. It also addresses the possible role of N-nitrosomelatonin (NOmela), whi…	JOURNAL OF EXPERIMENTAL BOTANY	2019	10.1093/jxb/erz375	#VALUE!	#VALUE!	1	0	0	0	0	1	0	0	1	0	0	0	0	0	0	0	1	0	0	0	0	0	0	0	0	0	0	0	0	0	0	0	0	0	0	0	0	0	0	1	0	0
Melatonin Is a Potential Target for Improving Post-Harvest Preservation of Fruits and Vegetables	Xu, T; Chen, Y; Kang, HS	Melatonin is a ubiquitous molecule distributed in nature and not only plays an important role in animals and humans but also has extensive functions in plants, such as delaying senescence, exerting antioxidant effects, regulating growth and development, and facilitating plant adaption to stress conditions. Endogenous melatonin is widespread in fruits and vegetables and plays prominent roles in th…	FRONTIERS IN PLANT SCIENCE	2019	10.3389/fpls.2019.01388	Xu, T	Kang, HS	3	0	1	1	1	0	0	0	1	0	0	0	0	0	0	1	1	1	0	0	0	0	0	0	0	0	0	0	0	0	0	0	0	0	0	0	0	1	0	1	0	0
Melatonin as a Chemical Substance or as Phytomelatonin Rich-Extracts for Use as Plant Protector and/or Biostimulant in Accordance with EC Legislation	Arnao, MB; Hernandez-Ruiz, J	Melatonin (N-acetyl-5-methoxytryptamine) is a ubiquitous molecule present in animals and plants, and also in bacteria and fungi. In plants, it has an important regulatory and protective role in the face of different stress situations in which it can be involved, mainly due to its immobility. Both in the presence of biotic and abiotic stressors, melatonin exerts protective action in which, through…	AGRONOMY-BASEL	2019	10.3390/agronomy9100570	Arnao, MB	Hernandez-Ruiz, J	2	0	1	1	0	0	0	0	1	0	0	0	0	0	0	0	0	1	0	0	0	0	0	0	0	0	1	1	0	0	0	0	0	0	0	0	0	0	0	0	0	0
Melatonin Mediated Regulation of Drought Stress: Physiological and Molecular Aspects	Sharma, A; Zheng, BS	Drought stress adversely effects physiological and biochemical processes of plants, leading to a reduction in plant productivity. Plants try to protect themselves via activation of their internal defense system, but severe drought causes dysfunction of this defense system. The imbalance between generation and scavenging of reactive oxygen species (ROS) leads to oxidative stress. Melatonin, a mult…	PLANTS-BASEL	2019	10.3390/plants8070190	Sharma, A	Zheng, BS	2	0	0	0	0	0	0	0	0	0	0	0	0	0	0	0	1	1	0	0	0	0	0	0	1	0	0	0	0	0	0	0	0	0	0	0	0	0	0	0	0	0
Melatonin in Medicinal and Food Plants: Occurrence, Bioavailability, and Health Potential for Humans	Salehi, B; Sharopov, F; Fokou, PVT; Kobylinska, A; de Jonge, L; Tadio, K; Sharifi-Rad, J; Posmyk, MM; Martorell, M; Martins, N; Iriti, M	Melatonin is a widespread molecule among living organisms involved in multiple biological, hormonal, and physiological processes at cellular, tissue, and organic levels. It is well-known for its ability to cross the blood brain barrier, and renowned antioxidant effects, acting as a free radical scavenger, up-regulating antioxidant enzymes, reducing mitochondrial electron leakage, and interfering …	CELLS	2019	10.3390/cells8070681	Salehi, B	Iriti, M	11	1	1	1	0	1	0	1	0	0	0	0	0	0	0	1	1	0	0	0	0	0	0	0	0	0	0	0	0	0	0	0	0	0	0	0	0	1	0	0	0	0
Role of Melatonin and Plant-Growth-Promoting Rhizobacteria in the Growth and Development of Plants	Asif, M; Pervez, A; Ahmad, R	Melatonin is a tryptophan-based indole molecule found in primitive photosynthetic bacteria to mammals. It performs different functions in plants like rhizogenesis, enhancing plant growth, seed germination, plant yield, biomass production, photosynthesis, circadian rhythm, and fruit ripening. In addition, one of the most significant attributes of melatonin is its antioxidant activity. Moreover, it…	CLEAN-SOIL AIR WATER	2019	10.1002/clen.201800459	Asif, M	Ahmad, R	3	0	1	1	0	0	1	0	0	0	0	0	1	1	0	1	0	1	0	0	0	0	1	0	1	0	1	1	0	0	1	0	0	0	0	0	0	0	0	1	1	0
Melatonin Synthesis and Function: Evolutionary History in Animals and Plants	Zhao, D; Yu, Y; Shen, Y; Liu, Q; Zhao, ZW; Sharma, R; Reiter, RJ	Melatonin is an ancient molecule that can be traced back to the origin of life. Melatonin's initial function was likely that as a free radical scavenger. Melatonin presumably evolved in bacteria; it has been measured in both alpha-proteobacteria and in photosynthetic cyanobacteria. In early evolution, bacteria were phagocytosed by primitive eukaryotes for their nutrient value. According to the en…	FRONTIERS IN ENDOCRINOLOGY	2019	10.3389/fendo.2019.00249	Zhao, D	Reiter, RJ	7	1	1	1	0	0	1	0	1	0	0	0	1	0	0	1	0	1	0	0	0	0	0	0	0	0	0	1	0	0	0	0	0	0	0	0	0	0	0	0	1	0
The Role of Melatonin in Salt Stress Responses	Li, JP; Liu, J; Zhu, TT; Zhao, C; Li, LY; Chen, M	Melatonin, an indoleamine widely found in animals and plants, is considered as a candidate phytohormone that affects responses to a variety of biotic and abiotic stresses. In plants, melatonin has a similar action to that of the auxin indole-3-acetic acid (IAA), and IAA and melatonin have the same biosynthetic precursor, tryptophan. Salt stress results in the rapid accumulation of melatonin in pl…	INTERNATIONAL JOURNAL OF MOLECULAR SCIENCES	2019	10.3390/ijms20071735	Li, JP	Chen, M	6	0	0	1	0	1	0	0	1	0	0	0	0	1	0	1	1	1	0	0	1	0	0	0	0	0	1	1	0	0	0	0	0	0	0	0	0	1	0	0	0	0
Melatonin Mediates Enhancement of Stress Tolerance in Plants	Debnath, B; Islam, W; Li, M; Sun, YT; Lu, XC; Mitra, S; Hussain, M; Liu, S; Qiu, DL	Melatonin is a multifunctional signaling molecule, ubiquitously distributed in different parts of plants and responsible for stimulating several physiological responses to adverse environmental conditions. In the current review, we showed that the biosynthesis of melatonin occurred in plants by themselves, and accumulation of melatonin fluctuated sharply by modulating its biosynthesis and metabol…	INTERNATIONAL JOURNAL OF MOLECULAR SCIENCES	2019	10.3390/ijms20051040	Debnath, B	Qiu, DL	9	0	1	1	1	1	0	0	0	0	0	0	0	1	0	1	1	1	0	0	0	0	1	0	1	0	1	1	0	0	0	0	0	0	0	0	0	0	0	0	0	0
Biosynthesis, Metabolism and Function of Auxin, Salicylic Acid and Melatonin in Climacteric and Non-climacteric Fruits	Perez-Llorca, M; Munoz, P; Muller, M; Munne-Bosch, S	Climacteric and non-climacteric fruits are differentiated by the ripening process, in particular by the involvement of ethylene, high respiration rates and the nature of the process, being autocatalytic or not, respectively. Here, we focus on the biosynthesis, metabolism and function of three compounds (auxin, salicylic acid and melatonin) sharing not only a common precursor (chorismate), but als…	FRONTIERS IN PLANT SCIENCE	2019	10.3389/fpls.2019.00136	Perez-Llorca, M	Munne-Bosch, S	4	0	0	0	0	0	0	0	0	0	0	0	0	0	0	0	0	0	0	0	0	0	0	0	0	0	0	0	0	0	0	0	0	0	0	0	0	0	0	0	0	1
Melatonin: A Small Molecule but Important for Salt Stress Tolerance in Plants	Zhan, HS; Nie, XJ; Zhang, T; Li, S; Wang, XY; Du, XH; Tong, W; Song, WN	Salt stress is one of the most serious limiting factors in worldwide agricultural production, resulting in huge annual yield loss. Since 1995, melatonin (N-acetyl-5-methoxytryptamine)an ancient multi-functional molecule in eukaryotes and prokaryoteshas been extensively validated as a regulator of plant growth and development, as well as various stress responses, especially its crucial role in pla…	INTERNATIONAL JOURNAL OF MOLECULAR SCIENCES	2019	10.3390/ijms20030709	Zhan, HS	Song, WN	8	0	1	1	0	1	0	0	0	0	0	0	0	1	0	1	0	1	0	0	1	0	0	0	0	0	0	0	0	0	0	0	0	0	0	0	0	0	0	1	0	1
New insights into the role of melatonin in plants and animals	Agathokleous, E; Kitao, M; Calabrese, EJ	Melatonin is a hormone produced in animals by the pineal gland and in plants under stress. Melatonin research has expanded rapidly, affecting an impressive enhancement in the understanding of its functions in plants and animals. However, far less focus has been directed to clarifying the nature of melatonin dose-response relationships. Here, we provide substantial evidence of melatonin-induced bi…	CHEMICO-BIOLOGICAL INTERACTIONS	2019	10.1016/j.cbi.2018.12.008	Agathokleous, E	Calabrese, EJ	3	0	0	0	0	0	1	0	1	0	0	0	1	0	0	0	0	1	0	0	0	0	0	0	0	0	0	0	0	0	0	0	0	0	0	0	0	0	0	0	0	0
Recent advancements in the mechanism of nitric oxide signaling associated with hydrogen sulfide and melatonin crosstalk during ethylene-induced fruit ripening in plants	Mukherjee, S	The current review focuses on the significant role of nitric oxide (NO) in modulating ethylene-induced fruit ripening responses in plants. In this context, hydrogen sulfide (H2S) and melatonin mediated crosstalk mechanisms have been discussed with recent updates. Physiological and biochemical events associated with climacteric fruit ripening involves a plethora of effects mediated by these biomol…	NITRIC OXIDE-BIOLOGY AND CHEMISTRY	2019	10.1016/j.niox.2018.11.003	#VALUE!	#VALUE!	1	0	0	0	1	1	0	0	0	0	0	0	0	0	0	0	1	0	0	0	0	0	0	0	0	0	0	0	0	0	0	0	0	0	0	0	0	0	0	1	0	1
Melatonin: A New Plant Hormone and/or a Plant Master Regulator?	Arnao, MB; Hernandez-Ruiz, J	Melatonin is a pleiotropic molecule with many diverse actions in plants. It is considered primarily an antioxidant with important actions in the control of reactive oxygen and nitrogen species (ROS and RNS), among other free radicals, and harmful oxidative molecules present in plant cells. In addition, plant melatonin is involved in multiple physiological actions, such as growth, rooting, seed ge…	TRENDS IN PLANT SCIENCE	2019	10.1016/j.tplants.2018.10.010	Arnao, MB	Hernandez-Ruiz, J	2	0	1	1	0	0	0	0	0	0	0	0	0	1	0	1	1	1	0	0	0	0	0	0	0	0	1	1	0	0	1	0	0	0	0	0	0	0	0	0	1	0
Novel perspectives on the molecular crosstalk mechanisms of serotonin and melatonin in plants	Mukherjee, S	Current review focuses on the significant role of serotonin and melatonin in various molecular crosstalk mechanisms in plants. In this context phytohormones (like auxin, gibberellins, ethylene or abscisic acid), plant growth regulators, and associated biomolecules like reactive oxygen species, nitric oxide, brassinosteroids and hydrogen sulphide have been discussed in a wider context. Long distan…	PLANT PHYSIOLOGY AND BIOCHEMISTRY	2018	10.1016/j.plaphy.2018.08.031	#VALUE!	#VALUE!	1	0	0	0	0	1	0	0	0	0	0	0	0	0	0	0	1	1	0	0	0	0	0	0	0	0	1	1	0	0	1	0	0	0	0	0	0	1	0	1	0	1
Phytomelatonin: Recent advances and future prospects	Kanwar, MK; Yu, JQ; Zhou, J	Melatonin (MEL) has been revealed as a phylogenetically conserved molecule with a ubiquitous distribution from primitive photosynthetic bacteria to higher plants, including algae and fungi. Since MEL is implicated in numerous plant developmental processes and stress responses, the exploration of its functions in plant has become a rapidly progressing field with the new paradigm of involvement in …	JOURNAL OF PINEAL RESEARCH	2018	10.1111/jpi.12526	Kanwar, MK	Zhou, J	3	1	1	1	0	1	0	0	1	0	0	0	0	1	0	0	1	1	0	0	0	0	0	0	0	0	0	0	0	0	0	0	0	0	0	0	0	0	0	1	0	0
Melatonin and Its Effects on Plant Systems	Sharif, R; Xie, C; Zhang, HQ; Arnao, MB; Ali, M; Ali, Q; Muhammad, I; Shalmani, A; Nawaz, MA; Chen, P; Li, YH	Melatonin (N-acetyl-5-methoxytryptamine) is a nontoxic biological molecule produced in a pineal gland of animals and different tissues of plants. It is an important secondary messenger molecule, playing a vital role in coping with various abiotic and biotic stresses. Melatonin serves as an antioxidant in postharvest technology and enhances the postharvest life of fruits and vegetables. The applic…	MOLECULES	2018	10.3390/molecules23092352	Sharif, R	Li, YH	11	0	0	1	0	0	0	0	1	0	0	0	0	0	1	1	1	1	0	0	0	0	0	0	0	0	1	1	0	0	0	0	0	0	0	0	0	1	0	0	0	0
The Role of Phyto-Melatonin and Related Metabolites in Response to Stress	Yu, Y; Lv, Y; Shi, YN; Li, T; Chen, YC; Zhao, DK; Zhao, ZW	Plant hormone candidate melatonin has been widely studied in plants under various stress conditions, such as heat, cold, salt, drought, heavy metal, and pathogen attack. Under stress, melatonin usually accumulates sharply by modulating its biosynthesis and metabolic pathways. Beginning from the precursor tryptophan, four consecutive enzymes mediate the biosynthesis of tryptamine or 5-hydroxytrypt…	MOLECULES	2018	10.3390/molecules23081887	Yu, Y	Zhao, ZW	7	0	0	0	0	0	0	0	0	0	0	0	0	1	0	1	1	1	0	0	0	1	1	0	1	0	0	0	0	0	0	0	0	0	0	0	0	1	0	0	0	0
Melatonin: A Multifunctional Factor in Plants	Fan, JB; Xie, Y; Zhang, ZC; Chen, L	Melatonin (N-acetyl-5-methoxy-tryptamine) is a universal molecule that is present in animals and plants. It has been detected in different kinds of plants and organs in different levels. Melatonin in plants shares the same initial biosynthesis compound with auxin, and therefore functions as indole-3-acetic acid like hormones. Moreover, melatonin is involved in regulating plant growth and developm…	INTERNATIONAL JOURNAL OF MOLECULAR SCIENCES	2018	10.3390/ijms19051528	Fan, JB	Chen, L	4	0	1	1	0	0	0	0	1	0	0	0	0	0	0	0	1	1	0	0	0	1	1	0	1	0	1	1	0	0	0	0	0	0	0	0	0	1	0	1	0	0
Relationship of Melatonin and Salicylic Acid in Biotic/Abiotic Plant Stress Responses	Hernandez-Ruiz, J; Arnao, MB	Melatonin (N-acetyl-5-methoxytryptamine) was discovered in plants in 1995, while salicylic acid was the name given to the active ingredient of willow in 1838. From a physiological point of view, these two molecules present in plants have never been compared, even though they have a great number of similarities, as we shall see in this work. Both molecules have biosynthesis pathways that share a c…	AGRONOMY-BASEL	2018	10.3390/agronomy8040033	Hernandez-Ruiz, J	Arnao, MB	2	0	1	1	0	0	0	0	0	0	0	0	0	0	0	0	0	1	0	0	0	0	0	0	0	0	1	1	0	0	0	0	0	0	0	0	0	0	0	0	0	0
Phytomelatonin: a universal abiotic stress regulator	Wang, YP; Reiter, RJ; Chan, ZL	Melatonin, a derivative of tryptophan, was first detected in plant species in 1995 and it has been shown to be a diverse regulator during plant growth and development, and in stress responses. Recently, great progress has been made towards determining the detailed functions of melatonin in plant responses to abiotic stress. Melatonin priming improves plant tolerance to cold, heat, salt, and droug…	JOURNAL OF EXPERIMENTAL BOTANY	2018	10.1093/jxb/erx473	Wang, YP	Chan, ZL	3	0	1	1	1	1	0	0	0	0	0	0	0	1	0	0	1	1	0	0	0	1	0	0	1	0	1	1	0	0	0	0	0	0	0	0	0	0	0	1	0	0
Melatonin and its relationship to plant hormones	Arnao, MB; Hernandez-Ruiz, J	Background Plant melatonin appears to be a multi-regulatory molecule, similar to those observed in animals, with many specific functions in plant physiology. In recent years, the number of studies on melatonin in plants has increased significantly. One of the most studied actions of melatonin in plants is its effect on biotic and abiotic stress, such as that produced by drought, extreme temperatu…	ANNALS OF BOTANY	2018	10.1093/aob/mcx114	Arnao, MB	Hernandez-Ruiz, J	2	0	1	1	1	0	0	0	1	0	0	0	0	0	1	0	0	1	0	0	0	0	0	0	1	0	1	1	0	0	1	0	0	0	0	0	1	0	0	0	0	1
Melatonin in plant morphogenesis	Erland, LAE; Saxena, PK	Melatonin is a ubiquitously present indoleamine with a vast capacity for modulating the growth and behavior of plants, animals, and microbes. Though melatonin was discovered in plants decades after its discovery in mammals, its presence has now been confirmed in almost all plant families. Despite this, the in vitro and in vivo mechanisms of action of melatonin are still poorly defined. Although t…	IN VITRO CELLULAR & DEVELOPMENTAL BIOLOGY-PLANT	2018	10.1007/s11627-017-9879-5	Erland, LAE	Saxena, PK	2	0	1	1	1	0	0	0	1	0	0	0	1	0	1	0	0	1	0	0	0	0	0	0	0	0	1	1	1	1	1	0	0	0	0	1	1	0	0	1	0	0
The Potential of Phytomelatonin as a Nutraceutical	Arnao, MB; Hernandez-Ruiz, J	Phytomelatonin (plant melatonin) is chemically related to the amino acid tryptophan and has many diverse properties. Phytomelatonin is an interesting compound due to its outstanding actions at the cellular and physiological level, especially its protective effect in plants exposed to diverse stress situations, while its vegetable origin offers many opportunities because it is a natural compound. …	MOLECULES	2018	10.3390/molecules23010238	Arnao, MB	Hernandez-Ruiz, J	2	1	1	1	0	0	0	0	0	0	1	0	0	0	0	0	0	1	0	0	0	0	0	0	0	0	0	0	0	0	0	0	0	0	0	0	0	0	0	0	0	0
Phytomelatonin and Its Roles in Plants	Yakupoglu, G; Koklu, S; Korkmaz, A	Since its discovery in plants, extensive research has been conducted on melatonin which was formerly known to be a hormone existed exclusively in animals. Studies have shown that melatonin was indeed present in every plant species tested and that it had similar roles as in animals. Main roles of phytomelatonin are to regulate circadian rhythm as well as growth and development and to enhance toler…	KSU TARIM VE DOGA DERGISI-KSU JOURNAL OF AGRICULTURE AND NATURE	2018	10.18016/ksudobil.320180	Yakupoglu, G	Korkmaz, A	3	0	1	1	0	0	1	0	1	0	0	0	1	0	0	0	0	1	0	0	0	0	0	0	0	0	0	0	0	0	0	0	0	0	0	0	0	0	0	1	0	0
Melatonin transport into mitochondria	Mayo, JC; Sainz, RM; Gonzalez-Menendez, P; Hevia, D; Cernuda-Cernuda, R	Melatonin is a well-known, nighttime-produced indole found in bacteria, eukaryotic unicellulars, animals or vascular plants. In vertebrates, melatonin is the major product of the pineal gland, which accounts for its increase in serum during the dark phase, but it is also produced by many other organs and cell types. Such a wide distribution is consistent with its multiple and well-described funct…	CELLULAR AND MOLECULAR LIFE SCIENCES	2017	10.1007/s00018-017-2616-8	Mayo, JC	Cernuda-Cernuda, R	5	0	1	1	0	0	1	1	1	0	0	0	0	0	0	1	0	0	0	0	0	0	0	0	0	0	0	0	0	0	0	0	0	0	0	0	0	0	0	0	0	0
Phytomelatonin: A review	Shibaeva, TG; Markovskaya, EF; Mamaev, AV	Melatonin (N-acetyl-5-methoxy tryptamine) is a hormone, an indole compound, which for a long time was considered as associated only with animals and humans. After 30 years of its discovery, it was detected also in plants. Ubiquitous presence and high concentrations of melatonin in higher plants, as opposite to animals, led to introduction of the term "phytomelatonin" in 2004. At present, proved b…	ZHURNAL OBSHCHEI BIOLOGII	2017		Shibaeva, TG	Mamaev, AV	3	0	1	1	0	0	1	0	1	0	0	0	1	0	0	1	0	1	0	0	0	0	0	0	0	0	0	0	0	0	0	0	0	0	0	0	0	0	0	0	0	0
Melatonin in Edible and Non-Edible Plants	Koca Caliskan, U; Aka, C; Bor, E	The concept of melatonin has become more important recently both in plants and in human who utilize plants for nutritional and health purposes. Melatonin, synthesized from L-tryptophan by enzyms, protects plants against difficult conditions. People have consumed these plants for their antioxidant, immunomodulator, antiinflammatory and anticancer effects. In parts of edible and non-edible plants, …	TURKISH JOURNAL OF PHARMACEUTICAL SCIENCES	2017	10.4274/tjps.33043	Koca Caliskan, U	Bor, E	3	1	1	1	0	0	0	0	1	0	0	0	0	0	0	1	0	0	0	0	0	0	0	0	0	0	0	0	0	0	0	0	0	0	0	0	0	1	0	0	0	0
Dietary Sources and Bioactivities of Melatonin	Meng, X; Li, Y; Li, S; Zhou, Y; Gan, RY; Xu, DP; Li, HB	Insomnia is a serious worldwide health threat, affecting nearly one third of the general population. Melatonin has been reported to improve sleep efficiency and it was found that eating melatonin-rich foods could assist sleep. During the last decades, melatonin has been widely identified and qualified in various foods from fungi to animals and plants. Eggs and fish are higher melatonin-containing…	NUTRIENTS	2017	10.3390/nu9040367	Meng, X	Li, HB	7	1	1	1	0	0	0	0	1	0	0	0	0	0	0	1	0	0	0	0	0	0	0	0	0	0	0	0	0	0	0	0	0	0	0	0	0	0	0	0	0	0
Are the proposed benefits of melatonin-rich foods too hard to swallow?	Kennaway, DJ	Melatonin has been proposed as a potent anti-oxidant, and its presence in many plants and foods has been suggested to be beneficial for health. Indeed, the concentrations of melatonin in blood and the melatonin metabolite 6 sulphatoxymelatonin in urine have been found to increase significantly after ingestion of melatonin-rich foods. In this review, the studies have been critically evaluated in l…	CRITICAL REVIEWS IN FOOD SCIENCE AND NUTRITION	2017	10.1080/10408398.2014.962686	#VALUE!	#VALUE!	1	0	1	1	0	0	0	0	0	0	0	0	0	0	1	0	0	0	0	0	0	0	0	0	0	0	0	0	0	0	0	0	0	0	0	0	0	0	0	0	0	0
Melatonin biosynthesis in plants: multiple pathways catalyze tryptophan to melatonin in the cytoplasm or chloroplasts	Back, K; Tan, DX; Reiter, RJ	Melatonin is an animal hormone as well as a signaling molecule in plants. It was first identified in plants in 1995, and almost all enzymes responsible for melatonin biosynthesis had already been characterized in these species. Melatonin biosynthesis from tryptophan requires four-step reactions. However, six genes, that is, TDC, TPH, T5H, SNAT, ASMT, and COMT, have been implicated in the synthesi…	JOURNAL OF PINEAL RESEARCH	2016	10.1111/jpi.12364	Back, K	Reiter, RJ	3	0	0	0	1	1	0	0	1	0	0	0	0	0	0	0	0	0	0	0	0	0	0	0	0	0	0	0	0	0	0	0	0	0	0	0	0	1	0	0	0	0
Constitutive photomorphogenesis protein 1 (COP1) and COP9 signalosome, evolutionarily conserved photomorphogenic proteins as possible targets of melatonin	Sanchez-Barcelo, EJ; Mediavilla, MD; Vriend, J; Reiter, RJ	The ubiquitin proteasome system has been proposed as a possible mechanism involved in the multiple actions of melatonin. COP1 (constitutive photomorphogenesis protein 1), a RING finger-type ubiquitin E3 ligase formerly identified in Arabidopsis, is a central switch for the transition from plant growth underground in darkness (etiolation) to growth under light exposure (photomorphogenesis). In dar…	JOURNAL OF PINEAL RESEARCH	2016	10.1111/jpi.12340	Sanchez-Barcelo, EJ	Reiter, RJ	4	0	0	0	0	1	0	0	0	0	0	0	0	0	1	0	0	1	0	0	0	0	0	0	0	0	0	0	0	1	0	0	0	0	0	0	0	0	0	0	0	1
On the significance of an alternate pathway of melatonin synthesis via 5-methoxytryptamine: comparisons across species	Tan, DX; Hardeland, R; Back, K; Manchester, LC; Alatorre-Jimenez, MA; Reiter, RJ	Melatonin is a phylogenetically ancient molecule. It is ubiquitously present in almost all organisms from primitive photosynthetic bacteria to humans. Its original primary function is presumable to be that of an antioxidant with other functions of this molecule having been acquired during evolution. The synthetic pathway of melatonin in vertebrates has been extensively studied. It is common knowl…	JOURNAL OF PINEAL RESEARCH	2016	10.1111/jpi.12336	Tan, DX	Reiter, RJ	6	0	1	1	0	0	0	1	1	0	0	0	0	0	0	1	1	0	0	0	0	0	0	0	0	0	0	0	0	0	0	0	0	0	0	0	0	0	0	0	0	0
Fundamental Issues of Melatonin-Mediated Stress Signaling in Plants	Shi, H; Chen, KL; Wei, YX; He, CZ	As a widely known hormone in animals, melatonin (N-acetyl-5-methoxytryptamine) has been more and more popular research topic in various aspects of plants. To summarize the these recent advances, this review focuses on the regulatory effects of melatonin in plant response to multiple abiotic stresses including salt, drought, cold, heat and oxidative stresses and biotic stress such as pathogen infe…	FRONTIERS IN PLANT SCIENCE	2016	10.3389/fpls.2016.01124	Shi, H	He, CZ	4	0	1	1	0	1	0	0	1	0	0	0	0	0	1	0	0	1	0	0	0	1	0	0	1	0	1	1	0	0	0	0	0	0	0	0	0	0	0	0	0	0
Melatonin in Plants - Diversity of Levels and Multiplicity of Functions	Hardeland, R	Melatonin has been detected in numerous plant species. A particularly surprising finding concerns the highly divergent levels of melatonin that vary between species, organs and environmental conditions, from a few pg/g to over 20 mu g/g, reportedly up to 200 mu g/g. Highest values have been determined in oily seeds and in plant organs exposed to high UV radiation. The divergency of melatonin conc…	FRONTIERS IN PLANT SCIENCE	2016	10.3389/fpls.2016.00198	#VALUE!	#VALUE!	1	0	1	1	1	1	0	0	0	0	0	0	0	0	1	1	0	1	0	0	0	0	0	0	0	0	0	0	0	0	0	0	0	0	0	0	0	1	0	0	1	0
MELATONIN - A NEW PLANT BIOSTIMULATOR?	Kolodziejczyk, I; Posmyk, MM	Melatonin (MEL) is a highly conserved molecule occurring in evolutionarily distant organisms such as bacteria, mono-and multicellular algae, higher plants, invertebrates and vertebrates. Although until recently, this molecule was mainly known as an animal hormone and neuro-transmitter, its role in plants is currently being extensively investigated. MEL, N-acetyl-5-methoxytryptamine was found in v…	JOURNAL OF ELEMENTOLOGY	2016	10.5601/jelem.2015.20.3.1012	Kolodziejczyk, I	Posmyk, MM	2	1	1	1	1	0	0	1	1	0	0	0	0	0	0	1	0	1	0	0	0	0	0	0	0	0	0	0	0	0	0	0	0	0	0	1	0	1	0	1	1	0
A new balancing act: The many roles of melatonin and serotonin in plant growth and development	Erland, LAE; Murch, SJ; Reiter, RJ; Saxena, PK	Melatonin and serotonin are indoleamines first identified as neurotransmitters in vertebrates; they have now been found to be ubiquitously present across all forms of life. Both melatonin and serotonin were discovered in plants several years after their discovery in mammals, but their presence has now been confirmed in almost all plant families. The mechanisms of action of melatonin and serotonin…	PLANT SIGNALING & BEHAVIOR	2015	10.1080/15592324.2015.1096469	Erland, LAE	Saxena, PK	4	1	1	1	1	0	0	1	0	0	0	0	0	0	0	0	1	1	0	0	0	0	0	0	0	0	1	1	1	0	1	0	0	0	0	1	1	0	1	1	0	0
Regulatory roles of serotonin and melatonin in abiotic stress tolerance in plants	Kaur, H; Mukherjee, S; Baluska, F; Bhatla, SC	Understanding the physiological and biochemical basis of abiotic stress tolerance in plants has always been one of the major aspects of research aiming to enhance plant productivity in arid and semi-arid cultivated lands all over the world. Growth of stress-tolerant transgenic crops and associated agricultural benefits through increased productivity, and related ethical issues, are also the major…	PLANT SIGNALING & BEHAVIOR	2015	10.1080/15592324.2015.1049788	Kaur, H	Bhatla, SC	4	0	0	0	0	1	0	0	0	0	0	0	0	0	0	0	0	1	0	0	0	0	0	0	0	0	1	1	0	0	0	0	0	0	0	0	0	1	0	0	0	0
Melatonin: an ancient molecule that makes oxygen metabolically tolerable	Manchester, LC; Coto-Montes, A; Boga, JA; Andersen, LPH; Zhou, Z; Galano, A; Vriend, J; Tan, DX; Reiter, RJ	Melatonin is remarkably functionally diverse with actions as a free radical scavenger and antioxidant, circadian rhythm regulator, anti-inflammatory and immunoregulating molecule, and as an oncostatic agent. We hypothesize that the initial and primary function of melatonin in photosynthetic cyanobacteria, which appeared on Earth 3.5-3.2billion years ago, was as an antioxidant. The evolution of me…	JOURNAL OF PINEAL RESEARCH	2015	10.1111/jpi.12267	Manchester, LC	Reiter, RJ	9	0	1	1	0	0	1	0	0	0	0	0	1	1	0	1	0	1	0	0	0	0	0	0	0	0	0	0	0	0	0	0	0	0	0	0	0	1	0	0	0	0
Melatonin as a Potent and Inducible Endogenous Antioxidant: Synthesis and Metabolism	Tan, DX; Manchester, LC; Esteban-Zubero, E; Zhou, Z; Reiter, RJ	Melatonin is a tryptophan-derived molecule with pleiotropic activities. It is present in almost all or all organisms. Its synthetic pathway depends on the species in which it is measured. For example, the tryptophan to melatonin pathway differs in plants and animals. It is speculated that the melatonin synthetic machinery in eukaryotes was inherited from bacteria as a result of endosymbiosis. How…	MOLECULES	2015	10.3390/molecules201018886	Tan, DX	Reiter, RJ	5	0	1	1	0	1	0	0	1	0	0	0	0	0	0	1	0	1	0	0	0	0	0	0	0	0	0	0	0	0	0	0	0	0	0	0	0	0	0	0	0	1
Functions of melatonin in plants: a review	Arnao, MB; Hernandez-Ruiz, J	The number of studies on melatonin in plants has increased significantly in recent years. This molecule, with a large set of functions in animals, has also shown great potential in plant physiology. This review outlines the main functions of melatonin in the physiology of higher plants. Its role as antistress agent against abiotic stressors, such as drought, salinity, low and high ambient tempera…	JOURNAL OF PINEAL RESEARCH	2015	10.1111/jpi.12253	Arnao, MB	Hernandez-Ruiz, J	2	1	1	1	0	0	1	0	1	0	0	0	1	1	0	0	1	1	0	0	0	0	0	0	1	0	1	1	0	0	0	0	0	0	0	0	0	0	0	1	0	0
Melatonin in Mediterranean diet, a new perspective	Iriti, M; Varoni, EM	The health-promoting properties of the Mediterranean diet have been attributed, at least in part, to the chemical diversity of plant foods. Among phytochemicals, polyphenols represent the paradigm of the relationship between healthy foods and reduced risk of chronic-degenerative diseases, although, in the past few years, a new element has enriched this scenario. Melatonin, and possibly other indo…	JOURNAL OF THE SCIENCE OF FOOD AND AGRICULTURE	2015	10.1002/jsfa.7051	Iriti, M	Varoni, EM	2	0	1	1	0	0	0	0	0	0	0	0	0	0	0	0	0	0	0	0	0	0	0	0	0	0	0	0	0	0	0	0	0	0	0	0	0	0	0	0	0	0
Phytomelatonin: Assisting Plants to Survive and Thrive	Reiter, RJ; Tan, DX; Zhou, Z; Cruz, MHC; Fuentes-Broto, L; Galano, A	This review summarizes the advances that have been made in terms of the identified functions of melatonin in plants. Melatonin is an endogenously-produced molecule in all plant species that have been investigated. Its concentration in plant organs varies in different tissues, e.g., roots versus leaves, and with their developmental stage. As in animals, the pathway of melatonin synthesis in plants…	MOLECULES	2015	10.3390/molecules20047396	Reiter, RJ	Galano, A	6	1	1	1	0	0	0	0	1	0	0	0	0	0	0	0	0	1	0	0	0	0	0	0	1	0	1	1	0	0	1	0	0	0	0	0	0	0	0	1	1	0
Melatonin in plants and other phototrophs: advances and gaps concerning the diversity of functions	Hardeland, R	Melatonin is synthesized in Alphaproteobacteria, Cyanobacteria, Dinoflagellata, Euglenoidea, Rhodophyta, Phaeophyta, and Viridiplantae. The biosynthetic pathways have been identified in dinoflagellates and plants. Other than in dinoflagellates and animals, tryptophan is not 5-hydroxylated in plants but is first decarboxylated. Serotonin is formed by 5-hydroxylation of tryptamine. Serotonin N-acet…	JOURNAL OF EXPERIMENTAL BOTANY	2015	10.1093/jxb/eru386	#VALUE!	#VALUE!	1	1	0	0	1	1	0	1	1	0	0	0	0	0	1	1	0	1	0	1	0	0	0	0	1	0	0	0	0	1	1	0	0	0	0	0	0	0	0	0	0	0
Roles of melatonin in abiotic stress resistance in plants	Zhang, N; Sun, QQ; Zhang, HJ; Cao, YY; Weeda, S; Ren, SX; Guo, YD	In recent years melatonin has emerged as a research highlight in plant studies. Melatonin has different functions in many aspects of plant growth and development. The most frequently mentioned functions of melatonin are related to abiotic stresses such as drought, radiation, extreme temperature, and chemical stresses. This review mainly focuses on the regulatory effects of melatonin when plants f…	JOURNAL OF EXPERIMENTAL BOTANY	2015	10.1093/jxb/eru336	Zhang, N	Guo, YD	7	0	1	0	0	0	0	0	0	0	0	0	0	0	1	0	0	1	0	0	0	0	0	0	1	0	1	1	0	0	0	0	0	0	0	0	0	0	0	1	0	0
Melatonin: plant growth regulator and/or biostimulator during stress?	Arnao, MB; Hernandez-Ruiz, J	Melatonin regulates the growth of roots, shoots, and explants, to activate seed germination and rhizogenesis and to delay induced leaf senescence. The antioxidant properties of melatonin would seem to explain, at least partially, its ability to fortify plants subjected to abiotic stress. In this Review we examine recent data on the gene-regulation capacity of melatonin that point to many interest…	TRENDS IN PLANT SCIENCE	2014	10.1016/j.tplants.2014.07.006	Arnao, MB	Hernandez-Ruiz, J	2	0	1	1	1	0	0	0	0	0	0	0	0	0	0	1	0	1	0	0	0	0	0	0	0	0	1	1	0	0	1	0	0	0	0	0	1	0	0	0	1	0
Fundamental Issues Related to the Origin of Melatonin and Melatonin Isomers during Evolution: Relation to Their Biological Functions	Tan, DX; Zheng, XD; Kong, J; Manchester, LC; Hardeland, R; Kim, SJ; Xu, XY; Reiter, RJ	Melatonin and melatonin isomers exist and/or coexist in living organisms including yeasts, bacteria and plants. The levels of melatonin isomers are significantly higher than that of melatonin in some plants and in several fermented products such as in wine and bread. Currently, there are no reports documenting the presence of melatonin isomers in vertebrates. From an evolutionary point of view, i…	INTERNATIONAL JOURNAL OF MOLECULAR SCIENCES	2014	10.3390/ijms150915858	Tan, DX	Reiter, RJ	8	1	1	1	0	0	0	1	1	0	0	0	0	0	0	0	0	1	0	1	0	0	0	0	0	0	0	0	0	0	0	0	0	0	0	0	0	1	0	0	0	0
Melatonin, an underestimated natural substance with great potential for agricultural application	Janas, KM; Posmyk, MM	Melatonin (MEL) was thought to be only a neurotransmitter found in vertebrates until its detection in other organisms including plants. Although the number of publications on MEL function in plants is expanding, the knowledge of this subject is still insufficient. Among many functions which MEL performs in plants, its role as an antioxidant and a growth promoter is most supported by experimental …	ACTA PHYSIOLOGIAE PLANTARUM	2013	10.1007/s11738-013-1372-0	Janas, KM	Posmyk, MM	2	1	1	1	0	0	0	1	1	0	0	0	0	0	0	1	0	1	0	0	0	0	0	0	0	0	0	0	0	0	0	0	0	0	0	0	0	0	0	0	1	0
Mitochondria and chloroplasts as the original sites of melatonin synthesis: a hypothesis related to melatonin's primary function and evolution in eukaryotes	Tan, DX; Manchester, LC; Liu, XY; Rosales-Corral, SA; Acuna-Castroviejo, D; Reiter, RJ	Mitochondria and chloroplasts are major sources of free radical generation in living organisms. Because of this, these organelles require strong protection from free radicals and associated oxidative stress. Melatonin is a potent free radical scavenger and antioxidant. It meets the criteria as a mitochondrial and chloroplast antioxidant. Evidence has emerged to show that both mitochondria and chl…	JOURNAL OF PINEAL RESEARCH	2013	10.1111/jpi.12026	Tan, DX	Reiter, RJ	6	0	0	0	0	0	0	0	1	0	0	0	0	0	0	1	0	1	0	0	0	0	0	0	0	0	0	1	0	0	0	0	0	0	0	0	0	1	0	0	0	0
The Universal Nature, Unequal Distribution and Antioxidant Functions of Melatonin and Its Derivatives	Reiter, RJ; Tan, DX; Rosales-Corral, S; Manchester, LC	Melatonin is an uncommonly widely distributed molecule. It is found throughout the plant and animal kingdoms, i.e., perhaps in every living organism. Within vertebrate organisms, melatonin also has an extremely wide distribution, seemingly being capable of entering every cell and all subcellular compartments. So-called morphophysiological barriers, e. g., the blood-brain barrier, are no impedimen…	MINI-REVIEWS IN MEDICINAL CHEMISTRY	2013		Reiter, RJ	Manchester, LC	4	0	1	1	0	0	0	1	1	1	0	0	0	0	0	1	0	0	0	0	0	0	0	1	0	0	0	0	0	0	0	0	0	0	0	0	0	0	0	0	0	0
Emergence of naturally occurring melatonin isomers and their proposed nomenclature	Tan, DX; Hardeland, R; Manchester, LC; Rosales-Corral, S; Coto-Montes, A; Boga, JA; Reiter, RJ	Melatonin was considered to be the sole member of this natural family. The emergence of naturally occurring melatonin isomers (MIs) has opened an exciting new research area. Currently, several MIs have been identified in wine, and these molecules are believed to be synthesized by either yeasts or bacteria. A tentative nomenclature for the MIs is proposed in this article. It will be important to e…	JOURNAL OF PINEAL RESEARCH	2012	10.1111/j.1600-079X.2012.00979.x	Tan, DX	Reiter, RJ	7	0	1	1	0	0	0	0	0	0	0	0	0	0	0	0	0	1	0	0	0	0	0	0	0	0	0	1	0	0	0	0	0	0	0	0	0	0	0	0	0	0
Functional roles of melatonin in plants, and perspectives in nutritional and agricultural science	Tan, DX; Hardeland, R; Manchester, LC; Korkmaz, A; Ma, SR; Rosales-Corral, S; Reiter, RJ	The presence of melatonin in plants is universal. Evidence has confirmed that a major portion of the melatonin is synthesized by plants themselves even though a homologue of the classic arylalkylamine N-acetyltransferase (AANAT) has not been identified as yet in plants. Thus, the serotonin N-acetylating enzyme in plants may differ greatly from the animal AANAT with regard to sequence and structur…	JOURNAL OF EXPERIMENTAL BOTANY	2012	10.1093/jxb/err256	Tan, DX	Reiter, RJ	7	1	1	1	0	0	0	0	1	0	0	0	0	1	0	0	0	1	0	0	0	1	0	0	0	0	0	0	0	0	1	0	0	0	0	0	0	1	0	1	0	0
Melatonin as an Endogenous Plant Regulatory Signal: Debates and Perspectives	Park, WJ	Melatonin (N-acetyl-5-methoxytryptamine) exists in plants, although it is commonly known as a neurohormone in animals. Indeed, the melatonin level is very high in some medicinal plants and changes developmental stage specifically, indicating that it plays specific physiological roles. Plant melatonin may play unique roles in plants as well as similar functions in animals. Furthermore, exogenously…	JOURNAL OF PLANT BIOLOGY	2011	10.1007/s12374-011-9159-6	#VALUE!	#VALUE!	1	0	1	0	0	1	0	0	1	0	0	0	0	0	0	0	0	0	0	0	0	0	0	0	0	0	0	0	0	0	0	0	0	0	0	1	0	0	1	1	0	0
Application of LC and LC-MS to the Analysis of Melatonin and Serotonin in Edible Plants	Huang, X; Mazza, G	Melatonin is a neurohormone produced by the pineal gland of animals. Serotonin is a monoamine neurotransmitter and one of the precursors of melatonin biosynthesis. These two indoleamines have recently been reported to have widespread occurrence in many edible plants. Consuming foodstuffs containing melatonin and serotonin could raise their physiologic concentrations in blood and enhance human hea…	CRITICAL REVIEWS IN FOOD SCIENCE AND NUTRITION	2011	10.1080/10408398.2010.529193	Huang, X	Mazza, G	2	0	1	1	0	0	0	0	1	0	0	0	0	0	0	0	0	0	0	0	0	0	0	0	0	0	0	0	0	0	0	0	0	0	0	0	0	0	0	0	0	0
Melatonin in traditional Mediterranean diets	Iriti, M; Varoni, EM; Vitalini, S	Compared with other industrialized countries, the lower incidence of chronic-degenerative disorders in Mediterranean populations has been emphasized in recent decades. The health-promoting effects arising from Mediterranean dietary habits have been attributed to the large intake of plant foodstuffs rich in bioactive phytochemicals, such as melatonin. Recently, it has been suggested that melatonin…	JOURNAL OF PINEAL RESEARCH	2010	10.1111/j.1600-079X.2010.00777.x	Iriti, M	Vitalini, S	3	0	1	1	0	0	0	0	0	0	0	0	0	0	0	0	0	0	0	0	0	0	0	0	0	0	0	0	0	0	0	0	0	0	0	0	0	0	0	0	0	0
The changing biological roles of melatonin during evolution: from an antioxidant to signals of darkness, sexual selection and fitness	Tan, DX; Hardeland, R; Manchester, LC; Paredes, SD; Korkmaz, A; Sainz, RM; Mayo, JC; Fuentes-Broto, L; Reiter, RJ	Melatonin is a molecule present in a multitude of taxa and may be ubiquitous in organisms. It has been found in bacteria, unicellular eukaryotes, macroalgae, fungi, plants and animals. A primary biological function of melatonin in primitive unicellular organisms is in antioxidant defence to protect against toxic free radical damage. During evolution, melatonin has been adopted by multicellular or…	BIOLOGICAL REVIEWS	2010	10.1111/j.1469-185X.2009.00118.x	Tan, DX	Reiter, RJ	9	0	1	1	1	1	0	1	1	0	0	0	0	0	0	1	0	0	0	0	0	0	0	0	0	0	0	0	0	0	0	0	0	0	0	1	0	0	0	0	0	1
Analysis of melatonin in foods	Garcia-Parrilla, MC; Cantos, E; Troncoso, AM	Melatonin (N-acetyl-5-methoxytriptamine), a neurohormone produced by the pineal gland, has recently been reported in foods, mainly of plant origin. Literature concerning the biological properties is extensive. However, little is known about melatonin presence in foods or the analytical methods suitable for assay in food matrices and the potential influence of dietetic intake on human health. The …	JOURNAL OF FOOD COMPOSITION AND ANALYSIS	2009	10.1016/j.jfca.2008.09.009	Garcia-Parrilla, MC	Troncoso, AM	3	1	1	1	0	0	0	0	0	0	0	0	0	0	0	0	0	0	0	0	0	0	0	0	0	0	0	0	0	0	0	0	0	0	0	0	0	0	0	0	0	0
Melatonin in plants	Posmyk, MM; Janas, KM	A widespread occurrence of melatonin (MEL) in plant kingdom has been reported. MEL is a highly conserved molecule occurring in evolutionary distant organisms. Its role in plants seems to be similar to that in animals. Although MEL function in plants is not well known, yet a hypothesis can be put forward that it probably functions as a night signal, coordinating responses to diurnal and photoperio…	ACTA PHYSIOLOGIAE PLANTARUM	2009	10.1007/s11738-008-0213-z	Posmyk, MM	Janas, KM	2	1	1	1	0	1	0	0	1	0	0	0	0	0	0	1	1	0	0	0	0	0	0	0	0	0	0	0	0	0	0	0	0	0	0	0	0	0	0	0	0	0
Phytomelatonin: a review	Paredes, SD; Korkmaz, A; Manchester, LC; Tan, DX; Reiter, RJ	Melatonin (N-acetyl-5-methoxytryptamine) has been detected in a number of plant species. Indeed, there exists evidence that this classically-considered animal indole is actually both synthesized in and taken up by plants. Among the actions that melatonin may carry out in plant tissues, its role as an antioxidant or growth promoter is most strongly supported by the experimental evidence. Other sug…	JOURNAL OF EXPERIMENTAL BOTANY	2009	10.1093/jxb/ern284	Paredes, SD	Reiter, RJ	5	1	1	1	0	0	0	0	1	0	0	0	0	0	0	1	0	0	0	0	0	0	0	0	0	0	0	0	0	0	0	0	0	0	0	1	0	1	0	0	0	0
Melatonin, hormone of darkness and more - occurrence, control mechanisms, actions and bioactive metabolites	Hardeland, R	In its role as a pineal hormone, melatonin is a pleiotropic, nocturnally peaking and systemically acting chronobiotic. These effects are largely explained by actions via G protein-coupled membrane receptors found in the suprachiasmatic nucleus, but also in numerous other sites. Nuclear (ROR/RZR), cytoplasmic (quinone reductase-2, calmodulin, calreticulin) and mitochondrial binding sites and radic…	CELLULAR AND MOLECULAR LIFE SCIENCES	2008	10.1007/s00018-008-8001-x	#VALUE!	#VALUE!	1	0	0	0	0	0	0	0	0	0	0	0	0	0	0	0	0	0	0	0	0	0	0	0	0	0	0	1	0	0	0	0	0	0	0	0	0	1	0	0	0	0
Melatonin - Nature's most versatile biological signal?	Pandi-Perumal, SR; Srinivasan, V; Maestroni, GJM; Cardinali, DP; Poeggeler, B; Hardeland, R	Melatonin is a ubiquitous molecule and widely distributed in nature, with functional activity occurring in unicellular organisms, plants, fungi and animals. In most vertebrates, including humans, melatonin is synthesized primarily in the pineal gland and is regulated by the environmental light/dark cycle via the suprachiasmatic nucleus. Pinealocytes function as 'neuroendocrine transducers' to sec…	FEBS JOURNAL	2006	10.1111/j.1742-4658.2006.05322.x	Pandi-Perumal, SR	Hardeland, R	6	0	0	1	0	1	1	1	1	0	0	0	1	0	1	1	0	0	0	0	0	0	0	0	0	0	0	1	0	0	0	0	0	0	0	1	0	1	0	0	0	0
Melatonin in higher plants: occurrence and possible functions	Kolar, J; Machackova, I	Melatonin may be ubiquitous in the plant kingdom. This review considers the evaluation of methods of melatonin determination in plant material and possible melatonin functions in plants. Concerning the determination methods, the only reliable techniques are liquid chromatography - mass spectrometry or gas chromatography - mass spectrometry after some purification steps of the extract. Melatonin w…	JOURNAL OF PINEAL RESEARCH	2005	10.1111/j.1600-079X.2005.00276.x	Kolar, J	Machackova, I	2	1	1	1	0	1	0	0	0	0	0	0	0	0	0	1	0	0	0	0	0	0	0	0	0	0	0	0	0	0	0	0	0	0	0	0	0	0	0	0	0	0
Non-vertebrate melatonin	Hardeland, R; Poeggeler, B	Melatonin has been detected in bacteria, eukaryotic unicells, macroalgae, plants, fungi and various taxa of invertebrates. Although precise determinations are missing in many of these organisms and the roles of melatonin are still unknown, investigations in some species allow more detailed conclusions. Non-vertebrate melatonin is not necessarily circadian, and if so, not always peaking at night, …	JOURNAL OF PINEAL RESEARCH	2003	10.1034/j.1600-079X.2003.00040.x	Hardeland, R	Poeggeler, B	2	1	1	1	0	0	1	1	0	0	0	1	0	0	0	0	1	1	0	0	0	0	0	0	0	0	0	0	0	0	0	0	0	0	0	0	0	0	0	0	0	0
Melatonin: A potential regulator of plant growth and development?	Murch, SJ; Saxena, PK	Recent research has reported the presence of melatonin (N-acetyl-5-methoxytryptamine), a mammalian indoleamine neurohormone, in higher plants, indicating that melatonin may be an important metabolic regulator that has been highly conserved across biological kingdoms. Melatonin is synthesized from tryptophan in the mammalian pineal gland and a similar biosynthetic pathway was recently described in…	IN VITRO CELLULAR & DEVELOPMENTAL BIOLOGY-PLANT	2002	10.1079/IVP2002333	Murch, SJ	Saxena, PK	2	1	1	1	0	0	0	0	0	0	0	0	0	0	0	0	1	0	0	0	0	0	0	0	0	0	0	0	0	0	1	0	0	0	0	0	1	0	0	1	0	0
Melatonin in plants	Reiter, RJ; Tan, DX; Burkhardt, S; Manchester, LC	Once thought to be exclusively a molecule of the animal kingdom, melatonin has now been found to exist in plants as well. Among a number of actions, melatonin is a direct free radical scavenger and an indirect antioxidant. Melatonin directly detoxifies the hydroxyl radical (circle OH), hydrogen peroxide, nitric oxide, peroxynitrite anion, peroxynitrous acid, and hypochlorous acid. The products fr…	NUTRITION REVIEWS	2001		Reiter, RJ	Manchester, LC	4	1	1	1	0	0	0	0	1	0	0	0	0	0	0	1	0	1	0	0	0	0	0	0	0	0	0	0	0	0	0	0	0	0	0	0	0	1	0	0	0	0
Putative regulatory molecules in plants: evaluating melatonin	Van Tassel, DL; O'Neill, SD	Numerous classes of chemicals have been considered as regulators of various aspects of plant growth and development. In evaluating these putative regulatory molecules, plant biologists have encountered a number of challenges, including: the problem of quantifying substances present at trace levels in extremely complex mixtures; difficulty in obtaining and interpreting phenotypic responses to exog…	JOURNAL OF PINEAL RESEARCH	2001	10.1034/j.1600-079X.2001.310101.x	Van Tassel, DL	O'Neill, SD	2	0	1	1	0	1	0	0	1	0	0	0	0	0	0	0	0	0	0	0	0	0	0	0	0	0	0	0	0	0	0	0	0	0	0	0	0	0	0	1	0	0
New actions of melatonin and their relevance to biometeorology	Hardeland, R	Melatonin is not only produced by the pineal gland, retina and parietal but also by various other tissues and cells from vertebrates, invertebrates, fungi, plants, multicellular algae and by unicells. In plants, many invertebrates and unicells, its concentration often exceeds that found in vertebrate blood by several orders of magnitude. The action of melatonin is highly pleiotropic. It involves …	INTERNATIONAL JOURNAL OF BIOMETEOROLOGY	1997	10.1007/s004840050053	#VALUE!	#VALUE!	1	0	1	1	0	1	0	1	0	0	0	0	0	0	0	0	0	0	0	0	0	0	0	0	0	0	0	0	0	0	0	0	0	0	0	0	0	0	0	0	0	0
Melatonin in unicellular organisms and plants	Hardeland, R; Balzer, I; Fuhrberg, B; Behrmann, G		MELATONIN: A UNIVERSAL PHOTOPERIODIC SIGNAL WITH DIVERSE ACTIONS	1996		Hardeland, R	Behrmann, G	4	0	1	1	0	0	0	0	0	0	0	0	0	0	0	0	0	0	0	0	0	0	0	0	0	0	0	0	0	0	0	0	0	0	0	0	0	0	0	0	0	0
													0	0	0	0	0	0	0
[truncated: 111 more columns]

## Sheet: Query Terms
Melatonin and reactive oxygen and nitrogen species: a model for the plant redox network	Arnao, M. B.; Hernandez-Ruiz, J.	Melatonin (N-acetyl-5-methoxytryptamine) was discovered in plants in 1995; since then numerous functions have been attributed to this molecule in vascular plants. In addition to its recognized role as a universal antioxidant, other relevant functions have been studied in plants such as its rhizogenic- and vegetative-growth effects, protection against leaf senescence and influences on photosynthes…	MELATONIN RESEARCH	2019	10.32794/11250036	Arnao, M. B.	Hernandez-Ruiz, J.	2	0	0	0	1	1	1	1	1	1	1	1	1	1	1	1	1	1	1	1	0	0	0	1	1	1	1	1	1	1	1	1	1	1	1	0	1	0	1	1	1	1
[truncated: 36 more columns]

## Sheet: Interesting Not Relevant
Exposure to Artificial Light at Night and the Consequences for Flora, Fauna, and Ecosystems	Falcon, J; Torriglia, A; Attia, D; Vienot, F; Gronfier, C; Behar-Cohen, F; Martinsons, C; Hicks, D	The present review draws together wide-ranging studies performed over the last decades that catalogue the effects of artificial-light-at-night (ALAN) upon living species and their environment. We provide an overview of the tremendous variety of light-detection strategies which have evolved in living organisms - unicellular, plants and animals, covering chloroplasts (plants), and the plethora of o…	FRONTIERS IN NEUROSCIENCE	2020	10.3389/fnins.2020.602796	Falcon, J	Hicks, D	8	0	0	0	0	0	0	1	0	0	1	0	0	0	0	0	0	0	0	0	0	0	0	0	0	0	0	0	1	0	0	0	1	0	0	0	0	0	0	0	0	0
[truncated: 83 more columns]
